# Supplementary material for: High content image analysis of focal adhesion-dependent mechanosensitive stem cell differentiation
Source: Royal Society of Chemistry journal article supplement (doi:10.1039/c6ib00076b), 2016-01-01
Supplement: c6ib00076b2.xlsx [file c6ib00076b2.xlsx]

## Sheet: All Data
Supplemental Table 3
Protein	Accession	MOTIF_NAME	MOTIF_GROUP	SCORE	PERCENTILE	PROTEIN	SITE	SITE_SEQUENCE	SURFACE_ACCESS_VALUE
Integrin Alpha 1	P56199	Crk SH2	Src homology 2 group	0.443	0.0083691	ITA1_HUMAN (swissprot)	Y80	KNRTGDVyKCPVGRG	0.737769
		Abl Kinase	Tyrosine kinase group	0.3814	0.00123955	ITA1_HUMAN (swissprot)	Y80	KNRTGDVyKCPVGRG	0.737769
		14-3-3 Mode 1	Phosphoserine/threonine binding group	0.3112	0.00155782	ITA1_HUMAN (swissprot)	S89	CPVGRGEsLPCVKLD	0.359783
		Aurora A	Basophilic serine/threonine kinase	0.521	0.00670062	ITA1_HUMAN (swissprot)	T248	VQRGGRQtMTALGID	1.61864
		Aurora B	Basophilic serine/threonine kinase	0.5368	0.00703962	ITA1_HUMAN (swissprot)	S306	DENIQRFsIAILGSY	0.258555
		PKC delta	Basophilic serine/threonine kinase	0.4028	0.00601156	ITA1_HUMAN (swissprot)	T335	KSIASEPtEKHFFNV	4.17394
		ATM Kinase	DNA damage kinase group	0.5045	0.00804201	ITA1_HUMAN (swissprot)	S378	ASFEMEMsQTGFSAH	1.30186
		DNA PK	DNA damage kinase group	0.4784	0.00512328	ITA1_HUMAN (swissprot)	S387	TGFSAHYsQDWVMLG	1.99121
		AMP_Kinase	Basophilic serine/threonine kinase	0.6044	0.00716152	ITA1_HUMAN (swissprot)	T419	QIIIPRNtTFNVEST	2.25762
		PLK1 Kinase	Acidophilic serine/threonine kinase group	0.3297	0.00781004	ITA1_HUMAN (swissprot)	T420	IIIPRNTtFNVESTK	0.855521
		PDK1 Binding	Kinase binding site group	0.5706	0.00580692	ITA1_HUMAN (swissprot)	T439	LASYLGYtVNSATAS	0.851856
		PDK1 Binding	Kinase binding site group	0.5857	0.00744371	ITA1_HUMAN (swissprot)	E537	ALNQTRFeYQMSLEP	1.80759
		Itk Kinase	Tyrosine kinase group	0.3707	0.00239423	ITA1_HUMAN (swissprot)	Y604	DDHGGAVyIYHGSGK	0.402403
		PLK1 Kinase	Acidophilic serine/threonine kinase group	0.2406	0.00100346	ITA1_HUMAN (swissprot)	T714	KLKSKEDtIYEADLQ	1.81948
		PKC epsilon	Basophilic serine/threonine kinase	0.326	0.000322162	ITA1_HUMAN (swissprot)	T714	KLKSKEDtIYEADLQ	1.81948
		ATM Kinase	DNA damage kinase group	0.5114	0.00901013	ITA1_HUMAN (swissprot)	T725	ADLQYRVtLDSLRQI	0.88735
		Calmodulin dependent Kinase 2	Basophilic serine/threonine kinase	0.444	0.00305556	ITA1_HUMAN (swissprot)	S733	LDSLRQIsRSFFSGT	0.847365
		PKC delta	Basophilic serine/threonine kinase	0.4183	0.00998199	ITA1_HUMAN (swissprot)	S735	SLRQISRsFFSGTQE	0.809981
		PKC epsilon	Basophilic serine/threonine kinase	0.3955	0.00303016	ITA1_HUMAN (swissprot)	S735	SLRQISRsFFSGTQE	0.809981
		DNA PK	DNA damage kinase group	0.4729	0.00467549	ITA1_HUMAN (swissprot)	T740	SRSFFSGtQERKVQR	2.5766
		PKC alpha/beta/gamma	Basophilic serine/threonine kinase	0.4498	0.0090805	ITA1_HUMAN (swissprot)	T750	RKVQRNItVRKSECT	1.12557
		Aurora A	Basophilic serine/threonine kinase	0.5167	0.00634926	ITA1_HUMAN (swissprot)	S760	KSECTKHsFYMLDKH	1.12214
		PLK1 Kinase	Acidophilic serine/threonine kinase group	0.2866	0.00332052	ITA1_HUMAN (swissprot)	S819	EKCISDLsLHVATTE	0.352271
		PLK1 Kinase	Acidophilic serine/threonine kinase group	0.3067	0.00511836	ITA1_HUMAN (swissprot)	S842	QNDKFNVsLTVKNTK	0.336259
		PLK1 Kinase	Acidophilic serine/threonine kinase group	0.2554	0.0015637	ITA1_HUMAN (swissprot)	S910	ILFQFNTsYLMENVT	0.946507
		PLK1 Kinase	Acidophilic serine/threonine kinase group	0.3015	0.0045981	ITA1_HUMAN (swissprot)	T917	SYLMENVtIYLSATS	0.371322
		Casein Kinase 2	Acidophilic serine/threonine kinase group	0.4627	0.00683907	ITA1_HUMAN (swissprot)	S924	TIYLSATsDSEEPPE	1.73539
		PKC epsilon	Basophilic serine/threonine kinase	0.4185	0.00576033	ITA1_HUMAN (swissprot)	S994	YLIRKSGsFPMPELK	0.539675
		14-3-3 Mode 1	Phosphoserine/threonine binding group	0.4567	0.00992426	ITA1_HUMAN (swissprot)	S994	YLIRKSGsFPMPELK	0.539675
		AMP_Kinase	Basophilic serine/threonine kinase	0.6189	0.00912483	ITA1_HUMAN (swissprot)	S1005	PELKLSIsFPNMTSN	0.64508
		Protein Kinase A	Basophilic serine/threonine kinase	0.3323	0.00203852	ITA1_HUMAN (swissprot)	T1058	TDHLKRGtILDCNTC	0.61887
		PKC epsilon	Basophilic serine/threonine kinase	0.4311	0.0077033	ITA1_HUMAN (swissprot)	T1092	SLILWKPtFIKSYFS	1.24149
		AMP_Kinase	Basophilic serine/threonine kinase	0.5576	0.00306878	ITA1_HUMAN (swissprot)	S1099	TFIKSYFsSLNLTIR	0.769037
		PLK1 Kinase	Acidophilic serine/threonine kinase group	0.2533	0.00147319	ITA1_HUMAN (swissprot)	T1104	YFSSLNLtIRGELRS	0.61887
Integrin Alpha 2	P17301	Abl Kinase	Tyrosine kinase group	0.4772	0.00719681	ITA2_HUMAN (swissprot)	Y81	ENRMGDVyKCPVDLS	0.737769
		CDK1 motif 2 - [ST]PxxK	Proline-dependent serine/threonine kinase group	0.444	0.00998208	ITA2_HUMAN (swissprot)	S163	FQLSASFsPATQPCP	0.803423
		PKC delta	Basophilic serine/threonine kinase	0.4143	0.00895736	ITA2_HUMAN (swissprot)	S265	YARKYAYsAASGGRR	0.664877
		AMP_Kinase	Basophilic serine/threonine kinase	0.6241	0.00996687	ITA2_HUMAN (swissprot)	T275	SGGRRSAtKVMVVVT	0.657712
		DNA PK	DNA damage kinase group	0.4285	0.00216481	ITA2_HUMAN (swissprot)	S389	GFSADYSsQNDILML	3.1146
		PLK1 Kinase	Acidophilic serine/threonine kinase group	0.2919	0.00374017	ITA2_HUMAN (swissprot)	S637	GDSITDVsIGAFGQV	0.266766
		Protein Kinase A	Basophilic serine/threonine kinase	0.458	0.00876766	ITA2_HUMAN (swissprot)	T824	SNQNKRLtFSVTLKN	0.460108
		Aurora A	Basophilic serine/threonine kinase	0.349	0.000571188	ITA2_HUMAN (swissprot)	T824	SNQNKRLtFSVTLKN	0.460108
		Aurora B	Basophilic serine/threonine kinase	0.4074	0.00105872	ITA2_HUMAN (swissprot)	T824	SNQNKRLtFSVTLKN	0.460108
		PKC alpha/beta/gamma	Basophilic serine/threonine kinase	0.3578	0.00119815	ITA2_HUMAN (swissprot)	T828	KRLTFSVtLKNKRES	0.906032
		Aurora A	Basophilic serine/threonine kinase	0.4997	0.00515865	ITA2_HUMAN (swissprot)	S835	TLKNKREsAYNTGIV	2.75374
		Aurora B	Basophilic serine/threonine kinase	0.5483	0.00795232	ITA2_HUMAN (swissprot)	S835	TLKNKREsAYNTGIV	2.75374
		PDK1 Binding	Kinase binding site group	0.5686	0.00559013	ITA2_HUMAN (swissprot)	S855	NLFFASFsLPVDGTE	0.337297
		ATM Kinase	DNA damage kinase group	0.4743	0.00457605	ITA2_HUMAN (swissprot)	S916	SFQALSEsQEENKAD	3.70217
		DNA PK	DNA damage kinase group	0.4109	0.00155925	ITA2_HUMAN (swissprot)	S916	SFQALSEsQEENKAD	3.70217
		AMP_Kinase	Basophilic serine/threonine kinase	0.6145	0.00848194	ITA2_HUMAN (swissprot)	S1033	LKIGQTSsSVSFKSE	0.791711
		PDK1 Binding	Kinase binding site group	0.5781	0.00661989	ITA2_HUMAN (swissprot)	T1088	NGTFASStFQTVQLT	1.28548
Integrin Alpha 3	P26006	Erk D-domain	Kinase binding site group	0.6101	0.00992394	ITA3_HUMAN (swissprot)	L19	PRLMLCAlALMVAAG	0.08438
		Abl Kinase	Tyrosine kinase group	0.3845	0.00131821	ITA3_HUMAN (swissprot)	Y92	TNRTGAVyLCPLTAH	0.184043
		DNA PK	DNA damage kinase group	0.5021	0.00746679	ITA3_HUMAN (swissprot)	T206	LGTSGGFtQNTVYFG	1.18294
		PDK1 Binding	Kinase binding site group	0.5341	0.0026331	ITA3_HUMAN (swissprot)	S238	EWDLSEYsYKDPEDQ	4.36103
		Abl SH2	Src homology 2 group	0.4614	0.00971626	ITA3_HUMAN (swissprot)	Y239	WDLSEYSyKDPEDQG	3.89378
		Itk Kinase	Tyrosine kinase group	0.4059	0.00545326	ITA3_HUMAN (swissprot)	Y249	PEDQGNLyIGYTMQV	0.537533
		PLK1 Kinase	Acidophilic serine/threonine kinase group	0.3393	0.00918333	ITA3_HUMAN (swissprot)	T267	ILHPKNItIVTGAPR	0.290706
		ATM Kinase	DNA damage kinase group	0.4089	0.0012012	ITA3_HUMAN (swissprot)	S285	MGAVFLLsQEAGGDL	0.63285
		p85 SH2	Src homology 2 group	0.3427	0.00115612	ITA3_HUMAN (swissprot)	Y343	EEVGGAIyVFMNQAG	0.161731
		Itk Kinase	Tyrosine kinase group	0.4131	0.00642448	ITA3_HUMAN (swissprot)	Y400	FEGLGKVyIYHSSSK	0.796594
		Erk D-domain	Kinase binding site group	0.5584	0.00495103	ITA3_HUMAN (swissprot)	L555	MRCQKLElLLMDNLR	0.181666
		Amphiphysin SH3	Src homology 3 group	0.5411	0.00582662	ITA3_HUMAN (swissprot)	P577	ISMNYSLpLRMPDRP	0.625997
		Erk D-domain	Kinase binding site group	0.6054	0.00931711	ITA3_HUMAN (swissprot)	L591	PRLGLRSlDAYPILN	1.31131
		Erk D-domain	Kinase binding site group	0.5376	0.00369948	ITA3_HUMAN (swissprot)	L653	RDVRKLLlSINVTNT	0.201637
		Erk D-domain	Kinase binding site group	0.5323	0.00344794	ITA3_HUMAN (swissprot)	I655	VRKLLLSiNVTNTRT	0.317578
		PLK1 Kinase	Acidophilic serine/threonine kinase group	0.2464	0.00118648	ITA3_HUMAN (swissprot)	T699	GACQANEtIFCELGN	0.311226
		Erk D-domain	Kinase binding site group	0.6054	0.00931711	ITA3_HUMAN (swissprot)	L716	KRNQRMElLIAFEVI	0.18916
		Amphiphysin SH3	Src homology 3 group	0.5553	0.00746458	ITA3_HUMAN (swissprot)	P845	VHGNGSWpCRPPGDL	0.810617
		PLK1 Kinase	Acidophilic serine/threonine kinase group	0.2945	0.00396194	ITA3_HUMAN (swissprot)	T859	LINPLNLtLSDPGDR	0.840648
		Amphiphysin SH3	Src homology 3 group	0.4151	0.000402996	ITA3_HUMAN (swissprot)	P867	LSDPGDRpSSPQRRR	3.21863
		Cdc2 Kinase	Proline-dependent serine/threonine kinase group	0.2361	3.03704e-05	ITA3_HUMAN (swissprot)	S869	DPGDRPSsPQRRRRQ	3.33783
		Cdk5 Kinase	Proline-dependent serine/threonine kinase group	0.1655	2.23077e-05	ITA3_HUMAN (swissprot)	S869	DPGDRPSsPQRRRRQ	3.33783
		CDK1 motif 1 - [ST]Px[KR]x	Proline-dependent serine/threonine kinase group	0.2739	0.00179425	ITA3_HUMAN (swissprot)	S869	DPGDRPSsPQRRRRQ	3.33783
		CDK1 motif 2 - [ST]PxxK	Proline-dependent serine/threonine kinase group	0.4211	0.00732857	ITA3_HUMAN (swissprot)	S869	DPGDRPSsPQRRRRQ	3.33783
		p85 SH3 mode2	Src homology 3 group	0.6091	0.00974408	ITA3_HUMAN (swissprot)	P870	PGDRPSSpQRRRRQL	4.22792
		PLK1 Kinase	Acidophilic serine/threonine kinase group	0.3096	0.00541392	ITA3_HUMAN (swissprot)	T937	KARVWNStFIEDYRD	0.778066
Integrin Alpha 4	P13612	Erk D-domain	Kinase binding site group	0.5503	0.00441274	ITA4_HUMAN (swissprot)	V129	RDNQWLGvTLSRQPG	0.221405
		Abl Kinase	Tyrosine kinase group	0.4818	0.00779576	ITA4_HUMAN (swissprot)	Y166	KLPTGGCyGVPPDLR	0.216344
		Cdk5 Kinase	Proline-dependent serine/threonine kinase group	0.4809	0.0094495	ITA4_HUMAN (swissprot)	S529	DVNRKAEsPPRFYFS	2.51621
		Erk D-domain	Kinase binding site group	0.6101	0.00992394	ITA4_HUMAN (swissprot)	L572	RKDVRDIlTPIQIEA	0.346079
		PKC mu	Basophilic serine/threonine kinase	0.4433	0.00881148	ITA4_HUMAN (swissprot)	S592	PHVISKRsTEEFPPL	5.20688
		PKC epsilon	Basophilic serine/threonine kinase	0.3979	0.00322977	ITA4_HUMAN (swissprot)	T615	EKDIMKKtINFARFC	1.34081
		PLK1 Kinase	Acidophilic serine/threonine kinase group	0.3305	0.00792344	ITA4_HUMAN (swissprot)	S662	KTLMLNVsLFNAGDD	0.45395
		Itk Kinase	Tyrosine kinase group	0.4185	0.0071529	ITA4_HUMAN (swissprot)	Y717	DCSIGYIyVDHLSRI	0.665197
		PLK1 Kinase	Acidophilic serine/threonine kinase group	0.337	0.00885404	ITA4_HUMAN (swissprot)	S743	SRAEEDLsITVHATC	0.317578
		Erk D-domain	Kinase binding site group	0.5765	0.00630132	ITA4_HUMAN (swissprot)	I744	RAEEDLSiTVHATCE	0.258767
		Aurora B	Basophilic serine/threonine kinase	0.5708	0.00982321	ITA4_HUMAN (swissprot)	T777	LKYEVKLtVHGFVNP	0.545168
		PLK1 Kinase	Acidophilic serine/threonine kinase group	0.3141	0.00591887	ITA4_HUMAN (swissprot)	T808	MVEKMNLtFHVINTG	0.398338
		Calmodulin dependent Kinase 2	Basophilic serine/threonine kinase	0.4212	0.00185485	ITA4_HUMAN (swissprot)	T977	QRPKRYFtIVIISSS	0.163657
		Akt Kinase	Basophilic serine/threonine kinase	0.5332	0.00535476	ITA4_HUMAN (swissprot)	S1021	QEENRRDsWSYINSK	2.21785
		Protein Kinase A	Basophilic serine/threonine kinase	0.3204	0.00168932	ITA4_HUMAN (swissprot)	S1021	QEENRRDsWSYINSK	2.21785
		Aurora A	Basophilic serine/threonine kinase	0.4159	0.0016754	ITA4_HUMAN (swissprot)	S1021	QEENRRDsWSYINSK	2.21785
		Aurora B	Basophilic serine/threonine kinase	0.4682	0.00275057	ITA4_HUMAN (swissprot)	S1021	QEENRRDsWSYINSK	2.21785
Integrin Alpha 5	P08648	Cdc2 Kinase	Proline-dependent serine/threonine kinase group	0.5075	0.00809304	ITA5_HUMAN (swissprot)	S8	MGSRTPEsPLHAVQL	1.42703
		Cdk5 Kinase	Proline-dependent serine/threonine kinase group	0.4837	0.00980469	ITA5_HUMAN (swissprot)	S8	MGSRTPEsPLHAVQL	1.42703
		Abl SH3	Src homology 3 group	0.4591	0.0085268	ITA5_HUMAN (swissprot)	P24	WGPRRRPpLLPLLLL	1.1286
		p85 SH3 mode1	Src homology 3 group	0.4315	0.000503478	ITA5_HUMAN (swissprot)	P24	WGPRRRPpLLPLLLL	1.1286
		Src SH3	Src homology 3 group	0.2968	0.000208864	ITA5_HUMAN (swissprot)	P24	WGPRRRPpLLPLLLL	1.1286
		Erk D-domain	Kinase binding site group	0.495	0.00196953	ITA5_HUMAN (swissprot)	L26	PRRRPPLlPLLLLLL	0.25344
		p85 SH3 mode2	Src homology 3 group	0.4475	0.000580167	ITA5_HUMAN (swissprot)	P27	RRRPPLLpLLLLLLP	0.135168
		Erk D-domain	Kinase binding site group	0.2923	4.85483e-05	ITA5_HUMAN (swissprot)	L28	RRPPLLPlLLLLLPP	0.135168
		Nck 2nd SH3	Src homology 3 group	0.4985	0.00616395	ITA5_HUMAN (swissprot)	P34	PLLLLLLpPPPRVGG	0.891
		Intersectin SH3A	Src homology 3 group	0.6709	0.0098922	ITA5_HUMAN (swissprot)	P36	LLLLLPPpPRVGGFN	1.90451
		PDK1 Binding	Kinase binding site group	0.5848	0.00734615	ITA5_HUMAN (swissprot)	S63	PGSFFGFsVEFYRPG	0.292919
		PLK1 Kinase	Acidophilic serine/threonine kinase group	0.3103	0.00549247	ITA5_HUMAN (swissprot)	S124	GSRLLESsLSSSEGE	1.05561
		PKC epsilon	Basophilic serine/threonine kinase	0.4311	0.0077033	ITA5_HUMAN (swissprot)	S124	GSRLLESsLSSSEGE	1.05561
		ATM Kinase	DNA damage kinase group	0.4763	0.0047789	ITA5_HUMAN (swissprot)	T237	QGQILSAtQEQIAES	2.32572
		DNA PK	DNA damage kinase group	0.3192	0.000185721	ITA5_HUMAN (swissprot)	T237	QGQILSAtQEQIAES	2.32572
		PLK1 Kinase	Acidophilic serine/threonine kinase group	0.3425	0.0096971	ITA5_HUMAN (swissprot)	S270	ASSIYDDsYLGYSVA	1.09524
		PLCg C-terminal SH2	Src homology 2 group	0.4259	0.00906285	ITA5_HUMAN (swissprot)	Y302	KGNLTYGyVTILNGS	0.418081
		DNA PK	DNA damage kinase group	0.5165	0.00947428	ITA5_HUMAN (swissprot)	T420	GAPFGGEtQQGVVFV	1.68241
		Erk1 Binding	Kinase binding site group	0.224	0.00111985	ITA5_HUMAN (swissprot)	P429	QGVVFVFpGGPGGLG	0.344881
		Akt Kinase	Basophilic serine/threonine kinase	0.5449	0.00630711	ITA5_HUMAN (swissprot)	S514	NPEERSCsLEGNPVA	0.311812
		14-3-3 Mode 1	Phosphoserine/threonine binding group	0.4446	0.00857433	ITA5_HUMAN (swissprot)	S514	NPEERSCsLEGNPVA	0.311812
		ATM Kinase	DNA damage kinase group	0.4624	0.00369689	ITA5_HUMAN (swissprot)	T571	ASRQATLtQTLLIQN	0.811346
		Erk D-domain	Kinase binding site group	0.5644	0.00534977	ITA5_HUMAN (swissprot)	I606	DKLSPIHiALNFSLD	0.213184
		PLK1 Kinase	Acidophilic serine/threonine kinase group	0.3202	0.00661352	ITA5_HUMAN (swissprot)	T677	DKNALNLtFHAQNVG	0.542182
		Shc SH2	Src homology 2 group	0.4426	0.00544862	ITA5_HUMAN (swissprot)	Y703	TAPPEAEySGLVRHP	0.687094
		Fgr Kinase	Tyrosine kinase group	0.4089	0.00564683	ITA5_HUMAN (swissprot)	Y703	TAPPEAEySGLVRHP	0.687094
		Abl SH3	Src homology 3 group	0.4166	0.00441062	ITA5_HUMAN (swissprot)	P752	GGLRFTVpHLRDTKK	0.834261
		PKC delta	Basophilic serine/threonine kinase	0.4163	0.00946968	ITA5_HUMAN (swissprot)	T760	HLRDTKKtIQFDFQI	1.39047
		PKC epsilon	Basophilic serine/threonine kinase	0.4142	0.00517079	ITA5_HUMAN (swissprot)	T760	HLRDTKKtIQFDFQI	1.39047
		PDK1 Binding	Kinase binding site group	0.591	0.00803297	ITA5_HUMAN (swissprot)	D764	TKKTIQFdFQILSKN	0.603301
		Lck SH2	Src homology 2 group	0.4084	0.00938442	ITA5_HUMAN (swissprot)	Y830	GPAVHHVyELINQGP	0.36307
		Src SH2	Src homology 2 group	0.4029	0.00823545	ITA5_HUMAN (swissprot)	Y830	GPAVHHVyELINQGP	0.36307
		Abl Kinase	Tyrosine kinase group	0.4641	0.00579512	ITA5_HUMAN (swissprot)	Y995	WTKAEGSyGVPLWII	0.540861
Integrin Alpha 6	P23229	PKC zeta	Basophilic serine/threonine kinase	0.4505	0.00491526	ITA6_HUMAN (swissprot)	S42	RKYGDPGsLFGFSLA	0.332108
		Casein Kinase 2	Acidophilic serine/threonine kinase group	0.4268	0.00393954	ITA6_HUMAN (swissprot)	S107	DNDADPTsESKEDQW	3.1809
		Calmodulin dependent Kinase 2	Basophilic serine/threonine kinase	0.4196	0.00177924	ITA6_HUMAN (swissprot)	S147	HVNTKQEsRDIFGRC	2.11189
		PLK1 Kinase	Acidophilic serine/threonine kinase group	0.3349	0.00855339	ITA6_HUMAN (swissprot)	T225	RVEQKNNtFFDMNIF	1.15495
		Casein Kinase 2	Acidophilic serine/threonine kinase group	0.4716	0.00795648	ITA6_HUMAN (swissprot)	T243	PYEVGGEtEHDESLV	2.23069
		Abl SH2	Src homology 2 group	0.4099	0.00405557	ITA6_HUMAN (swissprot)	Y268	LFLTSVSyTDPDQFV	1.33103
		PDK1 Binding	Kinase binding site group	0.5561	0.00423518	ITA6_HUMAN (swissprot)	S300	MNSYLGFsLDSGKGI	0.485708
		PLK1 Kinase	Acidophilic serine/threonine kinase group	0.3097	0.00542514	ITA6_HUMAN (swissprot)	T314	IVSKDEItFVSGAPR	0.345807
		p85 SH2	Src homology 2 group	0.3427	0.00115612	ITA6_HUMAN (swissprot)	Y391	GEVGGAVyVYMNQQG	0.309872
		CDK1 motif 1 - [ST]Px[KR]x	Proline-dependent serine/threonine kinase group	0.2998	0.0025872	ITA6_HUMAN (swissprot)	T516	IQKTITVtPNRIDLR	1.79177
		PDK1 Binding	Kinase binding site group	0.5644	0.00513487	ITA6_HUMAN (swissprot)	E543	LQVKSCFeYTANPAG	0.420845
		Protein Kinase A	Basophilic serine/threonine kinase	0.4172	0.00598148	ITA6_HUMAN (swissprot)	S570	AEKERRKsGLSSRVQ	1.31564
		Aurora B	Basophilic serine/threonine kinase	0.4946	0.00409006	ITA6_HUMAN (swissprot)	S570	AEKERRKsGLSSRVQ	1.31564
		ATM Kinase	DNA damage kinase group	0.5095	0.00874355	ITA6_HUMAN (swissprot)	T588	QGSEPKYtQELTLKR	2.56339
		DNA PK	DNA damage kinase group	0.3979	0.00121554	ITA6_HUMAN (swissprot)	T588	QGSEPKYtQELTLKR	2.56339
		PKC alpha/beta/gamma	Basophilic serine/threonine kinase	0.4161	0.00458166	ITA6_HUMAN (swissprot)	T592	PKYTQELtLKRQKQK	1.52583
		Src SH3	Src homology 3 group	0.4326	0.00346722	ITA6_HUMAN (swissprot)	P620	RDKLRPIpITASVEI	0.392543
		Akt Kinase	Basophilic serine/threonine kinase	0.3241	0.000137029	ITA6_HUMAN (swissprot)	S638	SSRRRVNsLPEVLPI	0.840648
		AMP_Kinase	Basophilic serine/threonine kinase	0.5591	0.00315042	ITA6_HUMAN (swissprot)	S638	SSRRRVNsLPEVLPI	0.840648
		14-3-3 Mode 1	Phosphoserine/threonine binding group	0.3054	0.00139448	ITA6_HUMAN (swissprot)	S638	SSRRRVNsLPEVLPI	0.840648
		PDK1 Binding	Kinase binding site group	0.5478	0.00360318	ITA6_HUMAN (swissprot)	S692	EGNQDKFsYLPIQKG	1.06263
		Erk D-domain	Kinase binding site group	0.5939	0.00799281	ITA6_HUMAN (swissprot)	I715	QKDIALEiTVTNSPS	0.354674
		CDK1 motif 2 - [ST]PxxK	Proline-dependent serine/threonine kinase group	0.422	0.00741676	ITA6_HUMAN (swissprot)	S720	LEITVTNsPSNPRNP	2.56135
		Crk SH3	Src homology 3 group	0.4299	0.00454252	ITA6_HUMAN (swissprot)	P724	VTNSPSNpRNPTKDG	4.0109
		Aurora B	Basophilic serine/threonine kinase	0.5576	0.0087184	ITA6_HUMAN (swissprot)	S786	GNPFKRNsNVTFYLV	1.79688
		PLK1 Kinase	Acidophilic serine/threonine kinase group	0.2381	0.000924577	ITA6_HUMAN (swissprot)	T789	FKRNSNVtFYLVLST	0.458692
		PLK1 Kinase	Acidophilic serine/threonine kinase group	0.2774	0.00270039	ITA6_HUMAN (swissprot)	T800	VLSTTEVtFDTPDLD	0.887207
		Casein Kinase 1	Acidophilic serine/threonine kinase group	0.3902	0.00517429	ITA6_HUMAN (swissprot)	S867	KSEDEVGsLIEYEFR	0.225833
		Protein Kinase A	Basophilic serine/threonine kinase	0.4038	0.0052016	ITA6_HUMAN (swissprot)	S955	IDDNRKFsLFAERKY	0.383665
		AMP_Kinase	Basophilic serine/threonine kinase	0.6235	0.00986972	ITA6_HUMAN (swissprot)	S985	CPLRGLDsKASLILR	1.14512
		PLK1 Kinase	Acidophilic serine/threonine kinase group	0.3005	0.00449805	ITA6_HUMAN (swissprot)	T999	RSRLWNStFLEEYSK	0.915372
		PLCg N-terminal SH2	Src homology 2 group	0.3539	0.00623915	ITA6_HUMAN (swissprot)	Y1009	EEYSKLNyLDILMRA	0.477414
Integrin Alpha 7	Q13683	ATM Kinase	DNA damage kinase group	0.4685	0.00412058	ITA7_HUMAN (swissprot)	S167	IGRCFVLsQDLAIRD	0.448345
		PDK1 Binding	Kinase binding site group	0.5561	0.00423518	ITA7_HUMAN (swissprot)	S310	LNSYLGFsIDSGKGL	0.412851
		Aurora A	Basophilic serine/threonine kinase	0.4143	0.00164074	ITA7_HUMAN (swissprot)	T361	MLSGERLtSGFGYSL	0.613477
		Aurora B	Basophilic serine/threonine kinase	0.4467	0.00196383	ITA7_HUMAN (swissprot)	T361	MLSGERLtSGFGYSL	0.613477
		Src SH2	Src homology 2 group	0.4149	0.00994315	ITA7_HUMAN (swissprot)	Y400	EELGGAVyVYLNQGG	0.258227
		CDK1 motif 1 - [ST]Px[KR]x	Proline-dependent serine/threonine kinase group	0.3262	0.00348935	ITA7_HUMAN (swissprot)	S413	GGHWAGIsPLRLCGS	0.532097
		PKC epsilon	Basophilic serine/threonine kinase	0.4415	0.00964232	ITA7_HUMAN (swissprot)	S505	YPDLLVGsLADTAVL	0.313842
		Aurora A	Basophilic serine/threonine kinase	0.5373	0.00823103	ITA7_HUMAN (swissprot)	T588	RGQVPRVtFLSRNLE	0.460108
		Erk D-domain	Kinase binding site group	0.5853	0.00715678	ITA7_HUMAN (swissprot)	V635	DKLRAIVvTLSYSLQ	0.141146
		Cdc2 Kinase	Proline-dependent serine/threonine kinase group	0.4468	0.00303084	ITA7_HUMAN (swissprot)	T643	TLSYSLQtPRLRRQA	1.17976
		Cdk5 Kinase	Proline-dependent serine/threonine kinase group	0.4041	0.00307002	ITA7_HUMAN (swissprot)	T643	TLSYSLQtPRLRRQA	1.17976
		Nck 2nd SH3	Src homology 3 group	0.4958	0.00586585	ITA7_HUMAN (swissprot)	P657	APGQGLPpVAPILNA	0.523908
		Erk D-domain	Kinase binding site group	0.5464	0.00415356	ITA7_HUMAN (swissprot)	L849	RARVFIElPLSIAGM	0.392072
		Erk D-domain	Kinase binding site group	0.5149	0.00265305	ITA7_HUMAN (swissprot)	L948	PRPNILHlDVDSRDR	0.438984
		PLK1 Kinase	Acidophilic serine/threonine kinase group	0.3005	0.00449805	ITA7_HUMAN (swissprot)	T1027	WGRLWNStFLEEYSA	0.915372
		Cdc2 Kinase	Proline-dependent serine/threonine kinase group	0.4463	0.00300304	ITA7_HUMAN (swissprot)	S1150	ILRNNWGsPRREGPD	1.8956
		Cdk5 Kinase	Proline-dependent serine/threonine kinase group	0.4035	0.00304296	ITA7_HUMAN (swissprot)	S1150	ILRNNWGsPRREGPD	1.8956
		CDK1 motif 1 - [ST]Px[KR]x	Proline-dependent serine/threonine kinase group	0.3559	0.00453344	ITA7_HUMAN (swissprot)	S1150	ILRNNWGsPRREGPD	1.8956
Integrin Alpha 8	P53708	DNA PK	DNA damage kinase group	0.4179	0.00174432	ITA8_HUMAN (swissprot)	S83	GAPKANTsQPDIVEG	3.31005
		Abl Kinase	Tyrosine kinase group	0.4636	0.00574683	ITA8_HUMAN (swissprot)	Y94	IVEGGAVyYCPWPAE	0.349682
		CDK1 motif 1 - [ST]Px[KR]x	Proline-dependent serine/threonine kinase group	0.4189	0.00758614	ITA8_HUMAN (swissprot)	T162	HWRTLKPtPEKDPVG	5.47717
		PDK1 Binding	Kinase binding site group	0.594	0.00837105	ITA8_HUMAN (swissprot)	S185	FSAYAEFsPCRNSNA	0.747675
		CDK1 motif 1 - [ST]Px[KR]x	Proline-dependent serine/threonine kinase group	0.3521	0.00438762	ITA8_HUMAN (swissprot)	S185	FSAYAEFsPCRNSNA	0.747675
		Grb2 SH2	Src homology 2 group	0.5301	0.00909775	ITA8_HUMAN (swissprot)	Y209	AGFSLDFyKNGDLIV	1.71616
		DNA PK	DNA damage kinase group	0.3904	0.0010561	ITA8_HUMAN (swissprot)	S280	AGEFTGDsQQELVAG	2.63627
		PLK1 Kinase	Acidophilic serine/threonine kinase group	0.3408	0.00941479	ITA8_HUMAN (swissprot)	T307	IINSTDMtFIQNFTG	0.574572
		PDK1 Binding	Kinase binding site group	0.5425	0.00322789	ITA8_HUMAN (swissprot)	E349	APLFMEReFESNPRE	2.70543
		PLCg N-terminal SH2	Src homology 2 group	0.3788	0.00976926	ITA8_HUMAN (swissprot)	Y361	PREVGQIyLYLQVSS	0.464535
		PKC epsilon	Basophilic serine/threonine kinase	0.4415	0.00964232	ITA8_HUMAN (swissprot)	S368	YLYLQVSsLLFRDPQ	0.179892
		Calmodulin dependent Kinase 2	Basophilic serine/threonine kinase	0.4767	0.00606585	ITA8_HUMAN (swissprot)	S577	LVIKRQKsHQCQDFI	1.34361
		Erk D-domain	Kinase binding site group	0.5156	0.00267709	ITA8_HUMAN (swissprot)	I602	DKLSPINiSLNYSLD	0.347067
		PLK1 Kinase	Acidophilic serine/threonine kinase group	0.3163	0.00616574	ITA8_HUMAN (swissprot)	S607	INISLNYsLDESTFK	1.91668
		PKC epsilon	Basophilic serine/threonine kinase	0.3526	0.000797229	ITA8_HUMAN (swissprot)	T612	NYSLDEStFKEGLEV	2.30199
		Fgr Kinase	Tyrosine kinase group	0.3798	0.00287637	ITA8_HUMAN (swissprot)	Y698	MIPEEADyVGIERNN	0.311911
		PDGFR Kin	Tyrosine kinase group	0.3465	0.00301861	ITA8_HUMAN (swissprot)	Y698	MIPEEADyVGIERNN	0.311911
		Calmodulin dependent Kinase 2	Basophilic serine/threonine kinase	0.476	0.00596888	ITA8_HUMAN (swissprot)	S712	NKGFRPLsCEYKMEN	0.569657
		PLK1 Kinase	Acidophilic serine/threonine kinase group	0.2856	0.00325189	ITA8_HUMAN (swissprot)	S755	RLEKTNMsINFDLQI	0.514476
		14-3-3 Mode 1	Phosphoserine/threonine binding group	0.3928	0.00469572	ITA8_HUMAN (swissprot)	S793	QVEIRGVsHPPQIVL	0.733899
		Itk Kinase	Tyrosine kinase group	0.3117	0.000472161	ITA8_HUMAN (swissprot)	Y855	ARDEFLLyIFHIQTL	0.201706
		AMP_Kinase	Basophilic serine/threonine kinase	0.6085	0.00769753	ITA8_HUMAN (swissprot)	T898	SAFLRNStIPHLVRK	1.09167
		CDK1 motif 1 - [ST]Px[KR]x	Proline-dependent serine/threonine kinase group	0.3545	0.00447972	ITA8_HUMAN (swissprot)	S917	VVEFHRQsPAKILNC	3.2543
		PLK1 Kinase	Acidophilic serine/threonine kinase group	0.3015	0.0045981	ITA8_HUMAN (swissprot)	S1007	IWATPNVsFSIPLWV	0.309639
Integrin Alpha 9	Q13797	Erk D-domain	Kinase binding site group	0.5665	0.00548933	ITA9_HUMAN (swissprot)	L18	GRLRALLlALVVAGI	0.0794788
		Amphiphysin SH3	Src homology 3 group	0.5329	0.00492961	ITA9_HUMAN (swissprot)	P34	AGAYNLDpQRPVHFQ	2.55966
		CDK1 motif 2 - [ST]PxxK	Proline-dependent serine/threonine kinase group	0.3408	0.002178	ITA9_HUMAN (swissprot)	S75	PKADSKYsPSVKSPG	1.48009
		14-3-3 Mode 1	Phosphoserine/threonine binding group	0.413	0.00597923	ITA9_HUMAN (swissprot)	T91	VFKCRVHtNPDRRCT	1.44042
		Protein Kinase A	Basophilic serine/threonine kinase	0.4332	0.00696812	ITA9_HUMAN (swissprot)	T98	TNPDRRCtELDMARG	0.828194
		Aurora B	Basophilic serine/threonine kinase	0.5552	0.00851896	ITA9_HUMAN (swissprot)	T98	TNPDRRCtELDMARG	0.828194
		Protein Kinase A	Basophilic serine/threonine kinase	0.3789	0.00385118	ITA9_HUMAN (swissprot)	T245	VIMNRRYtYLGYAVT	1.29796
		Aurora A	Basophilic serine/threonine kinase	0.3617	0.000712299	ITA9_HUMAN (swissprot)	T245	VIMNRRYtYLGYAVT	1.29796
		Aurora B	Basophilic serine/threonine kinase	0.5095	0.00502386	ITA9_HUMAN (swissprot)	T245	VIMNRRYtYLGYAVT	1.29796
		Protein Kinase A	Basophilic serine/threonine kinase	0.4664	0.0094736	ITA9_HUMAN (swissprot)	T288	RADRRSGtLIKIFQA	0.507079
		PKC zeta	Basophilic serine/threonine kinase	0.459	0.00570683	ITA9_HUMAN (swissprot)	T288	RADRRSGtLIKIFQA	0.507079
		PKC delta	Basophilic serine/threonine kinase	0.4128	0.00857313	ITA9_HUMAN (swissprot)	S302	ASGKKMGsYFGSSLC	0.403843
		DNA PK	DNA damage kinase group	0.4737	0.00474062	ITA9_HUMAN (swissprot)	S370	HFGESIAsLDDLDND	0.500185
		Itk Kinase	Tyrosine kinase group	0.4078	0.00570956	ITA9_HUMAN (swissprot)	Y397	DDFAGAVyIYHGDAG	0.402403
		PLK1 Kinase	Acidophilic serine/threonine kinase group	0.3007	0.00451806	ITA9_HUMAN (swissprot)	S468	PVITVDVsIFLPGSI	0.190547
		Cdc2 Kinase	Proline-dependent serine/threonine kinase group	0.4709	0.00462525	ITA9_HUMAN (swissprot)	T597	ERELPPLtPVLRWKK	0.399168
		Cdk5 Kinase	Proline-dependent serine/threonine kinase group	0.4735	0.00852279	ITA9_HUMAN (swissprot)	T597	ERELPPLtPVLRWKK	0.399168
		PLK1 Kinase	Acidophilic serine/threonine kinase group	0.2695	0.0022643	ITA9_HUMAN (swissprot)	S660	KNISLNIsISNLGDD	0.563985
		PLK1 Kinase	Acidophilic serine/threonine kinase group	0.3245	0.0071551	ITA9_HUMAN (swissprot)	S674	DAYDANVsFNVSREL	0.408555
		PLK1 Kinase	Acidophilic serine/threonine kinase group	0.3193	0.00650237	ITA9_HUMAN (swissprot)	S728	FSVIFDTsHLSGEEE	1.11308
		Akt Kinase	Basophilic serine/threonine kinase	0.5476	0.00657212	ITA9_HUMAN (swissprot)	S753	GNTERSEsLHDNTLV	1.3357
		PLK1 Kinase	Acidophilic serine/threonine kinase group	0.2837	0.00312149	ITA9_HUMAN (swissprot)	T758	SESLHDNtLVLMVPL	0.46559
		PLK1 Kinase	Acidophilic serine/threonine kinase group	0.282	0.00300482	ITA9_HUMAN (swissprot)	S772	LMHEVDTsITGIMSP	0.741015
		Erk1 Kinase	Proline-dependent serine/threonine kinase group	0.3405	0.000240007	ITA9_HUMAN (swissprot)	S778	TSITGIMsPTSFVYG	0.637116
		Aurora A	Basophilic serine/threonine kinase	0.4449	0.00256498	ITA9_HUMAN (swissprot)	S834	ISFPNRLsSGGAEMF	0.651037
		Aurora B	Basophilic serine/threonine kinase	0.3781	0.000677248	ITA9_HUMAN (swissprot)	S834	ISFPNRLsSGGAEMF	0.651037
		Erk D-domain	Kinase binding site group	0.5973	0.00832333	ITA9_HUMAN (swissprot)	I1015	RRRYKEIiEAEKNRK	0.590887
Integrin Alpha V	P06756	PKC epsilon	Basophilic serine/threonine kinase	0.4082	0.00442444	ITAV_HUMAN (swissprot)	S47	EYSGPEGsYFGFAVD	0.706725
		DNA PK	DNA damage kinase group	0.4821	0.00542452	ITAV_HUMAN (swissprot)	T76	GAPKANTtQPGIVEG	2.1124
		PKC alpha/beta/gamma	Basophilic serine/threonine kinase	0.4291	0.00604451	ITAV_HUMAN (swissprot)	S127	SHQWFGAsVRSKQDK	0.59814
		PLK1 Kinase	Acidophilic serine/threonine kinase group	0.3056	0.00500831	ITAV_HUMAN (swissprot)	S250	AQAIFDDsYLGYSVA	1.09524
		PKC delta	Basophilic serine/threonine kinase	0.4157	0.00931598	ITAV_HUMAN (swissprot)	S433	AARSMPPsFGYSMKG	0.985945
		14-3-3 Mode 1	Phosphoserine/threonine binding group	0.4166	0.00624877	ITAV_HUMAN (swissprot)	S492	NQDNKTCsLPGTALK	0.29982
		PIP3-binding PH	Lipid binding group	0.6744	0.00473094	ITAV_HUMAN (swissprot)	F503	TALKVSCfNVRFCLK	0.346067
		Cdk5 Kinase	Proline-dependent serine/threonine kinase group	0.4695	0.00813163	ITAV_HUMAN (swissprot)	S548	ALFLYSRsPSHSKNM	2.27291
		CDK1 motif 2 - [ST]PxxK	Proline-dependent serine/threonine kinase group	0.4262	0.00786546	ITAV_HUMAN (swissprot)	S548	ALFLYSRsPSHSKNM	2.27291
		14-3-3 Mode 1	Phosphoserine/threonine binding group	0.454	0.00962303	ITAV_HUMAN (swissprot)	S550	FLYSRSPsHSKNMTI	2.32076
		PLK1 Kinase	Acidophilic serine/threonine kinase group	0.3086	0.00530846	ITAV_HUMAN (swissprot)	T556	PSHSKNMtISRGGLM	1.00566
		Aurora A	Basophilic serine/threonine kinase	0.5448	0.00902586	ITAV_HUMAN (swissprot)	S697	NEALARLsCAFKTEN	0.23261
		Aurora B	Basophilic serine/threonine kinase	0.5368	0.00703962	ITAV_HUMAN (swissprot)	S697	NEALARLsCAFKTEN	0.23261
		14-3-3 Mode 1	Phosphoserine/threonine binding group	0.409	0.0056939	ITAV_HUMAN (swissprot)	S778	AVEIRGVsSPDHVFL	0.780602
		Casein Kinase 2	Acidophilic serine/threonine kinase group	0.4594	0.00653186	ITAV_HUMAN (swissprot)	T798	EHKENPEtEEDVGPV	4.43603
		Itk Kinase	Tyrosine kinase group	0.2986	0.000331279	ITAV_HUMAN (swissprot)	Y840	YNNNTLLyILHYDID	0.192101
		PKC epsilon	Basophilic serine/threonine kinase	0.4185	0.00576033	ITAV_HUMAN (swissprot)	S955	YSLKSSAsFNVIEFP	0.446244
		AMP_Kinase	Basophilic serine/threonine kinase	0.5844	0.00502557	ITAV_HUMAN (swissprot)	S955	YSLKSSAsFNVIEFP	0.446244
		PDK1 Binding	Kinase binding site group	0.5845	0.00731363	ITAV_HUMAN (swissprot)	E960	SASFNVIeFPYKNLP	0.433209
		PLK1 Kinase	Acidophilic serine/threonine kinase group	0.3092	0.00536904	ITAV_HUMAN (swissprot)	T975	IEDITNStLVTTNVT	0.653837
Integrin Beta 1	P05556	PLK1 Kinase	Acidophilic serine/threonine kinase group	0.3178	0.00633405	ITB1_HUMAN (swissprot)	T52	CGWCTNStFLQEGMP	0.915372
		Erk D-domain	Kinase binding site group	0.6054	0.00931711	ITB1_HUMAN (swissprot)	I143	KRAEDYPiDLYYLMD	0.839895
		p85 SH2	Src homology 2 group	0.5024	0.00811764	ITB1_HUMAN (swissprot)	Y146	EDYPIDLyYLMDLSY	0.632392
		PLK1 Kinase	Acidophilic serine/threonine kinase group	0.3396	0.00922629	ITB1_HUMAN (swissprot)	S152	LYYLMDLsYSMKDDL	0.8789
		Aurora A	Basophilic serine/threonine kinase	0.4909	0.00462448	ITB1_HUMAN (swissprot)	T177	MNEMRRItSDFRIGF	0.879956
		Aurora B	Basophilic serine/threonine kinase	0.4682	0.00275057	ITB1_HUMAN (swissprot)	T177	MNEMRRItSDFRIGF	0.879956
		AMP_Kinase	Basophilic serine/threonine kinase	0.5483	0.00256263	ITB1_HUMAN (swissprot)	S178	NEMRRITsDFRIGFG	0.879956
		CDK1 motif 1 - [ST]Px[KR]x	Proline-dependent serine/threonine kinase group	0.261	0.00144161	ITB1_HUMAN (swissprot)	T199	VMPYISTtPAKLRNP	1.99826
		CDK1 motif 2 - [ST]PxxK	Proline-dependent serine/threonine kinase group	0.4208	0.00729917	ITB1_HUMAN (swissprot)	T199	VMPYISTtPAKLRNP	1.99826
		PDK1 Binding	Kinase binding site group	0.5644	0.00513487	ITB1_HUMAN (swissprot)	S218	QNCTSPFsYKNVLSL	2.15182
		Grb2 SH2	Src homology 2 group	0.5132	0.00766237	ITB1_HUMAN (swissprot)	Y219	NCTSPFSyKNVLSLT	1.03288
		Crk SH2	Src homology 2 group	0.42	0.00562895	ITB1_HUMAN (swissprot)	Y314	MYTMSHYyDYPSIAH	3.09773
		Nck SH2	Src homology 2 group	0.4596	0.00768557	ITB1_HUMAN (swissprot)	Y314	MYTMSHYyDYPSIAH	3.09773
		Erk1 Binding	Kinase binding site group	0.5468	0.00524559	ITB1_HUMAN (swissprot)	P317	MSHYYDYpSIAHLVQ	0.879956
		AMP_Kinase	Basophilic serine/threonine kinase	0.6195	0.00922199	ITB1_HUMAN (swissprot)	S327	AHLVQKLsENNIQTI	2.44629
		Aurora B	Basophilic serine/threonine kinase	0.5631	0.00917632	ITB1_HUMAN (swissprot)	S390	ILENGKLsEGVTISY	0.644289
		PLK1 Kinase	Acidophilic serine/threonine kinase group	0.3104	0.00550369	ITB1_HUMAN (swissprot)	S419	GRKCSNIsIGDEVQF	0.416481
		Erk D-domain	Kinase binding site group	0.6051	0.00927838	ITB1_HUMAN (swissprot)	I420	RKCSNISiGDEVQFE	0.431906
		PLK1 Kinase	Acidophilic serine/threonine kinase group	0.3118	0.00566079	ITB1_HUMAN (swissprot)	S429	DEVQFEIsITSNKCP	0.505446
		PIP3-binding PH	Lipid binding group	0.6903	0.00605493	ITB1_HUMAN (swissprot)	F443	PKKDSDSfKIRPLGF	1.21937
		Cdc2 Kinase	Proline-dependent serine/threonine kinase group	0.3777	0.000869376	ITB1_HUMAN (swissprot)	S474	QSEGIPEsPKCHEGN	1.36324
		Cdk5 Kinase	Proline-dependent serine/threonine kinase group	0.3634	0.0015921	ITB1_HUMAN (swissprot)	S474	QSEGIPEsPKCHEGN	1.36324
		PLK1 Kinase	Acidophilic serine/threonine kinase group	0.3439	0.00992959	ITB1_HUMAN (swissprot)	S597	CDCSLDTsTCEASNG	0.991653
		PLCg SH3	Src homology 3 group	0.5532	0.00919009	ITB1_HUMAN (swissprot)	P685	KLPQPVQpDPVSHCK	0.87298
		PDK1 Binding	Kinase binding site group	0.307	0.000466378	ITB1_HUMAN (swissprot)	T704	DDCWFYFtYSVNGNN	0.699364
		PDK1 Binding	Kinase binding site group	0.5983	0.00885563	ITB1_HUMAN (swissprot)	S706	CWFYFTYsVNGNNEV	0.851856
		Shc PTB	Phosphotyrosine binding group	0.5526	0.00982785	ITB1_HUMAN (swissprot)	Y783	DTGENPIyKSAVTTV	1.05377
Integrin Beta 4	P16144	Aurora B	Basophilic serine/threonine kinase	0.5653	0.00936115	ITB4_HUMAN (swissprot)	S76	AAGCQREsIVVMESS	0.402266
		p85 SH2	Src homology 2 group	0.368	0.0016598	ITB4_HUMAN (swissprot)	Y133	LESPVDLyILMDFSN	0.282912
		PDK1 Binding	Kinase binding site group	0.5634	0.00502647	ITB4_HUMAN (swissprot)	D137	VDLYILMdFSNSMSD	0.605266
		AMP_Kinase	Basophilic serine/threonine kinase	0.6015	0.00678239	ITB4_HUMAN (swissprot)	S161	QNLARVLsQLTSDYT	0.387459
		PKC mu	Basophilic serine/threonine kinase	0.4426	0.00861631	ITB4_HUMAN (swissprot)	T164	ARVLSQLtSDYTIGF	1.65639
		PDK1 Binding	Kinase binding site group	0.5496	0.00373063	ITB4_HUMAN (swissprot)	S202	PNSDPPFsFKNVISL	1.18917
		ATM Kinase	DNA damage kinase group	0.4882	0.00598588	ITB4_HUMAN (swissprot)	T301	GTYTQYRtQDYPSVP	4.59966
		DNA PK	DNA damage kinase group	0.4494	0.00312134	ITB4_HUMAN (swissprot)	T301	GTYTQYRtQDYPSVP	4.59966
		PDK1 Binding	Kinase binding site group	0.5688	0.00561181	ITB4_HUMAN (swissprot)	D303	YTQYRTQdYPSVPTL	3.10573
		AMP_Kinase	Basophilic serine/threonine kinase	0.5741	0.00418131	ITB4_HUMAN (swissprot)	T309	QDYPSVPtLVRLLAK	0.455052
		PLK1 Kinase	Acidophilic serine/threonine kinase group	0.3094	0.00539148	ITB4_HUMAN (swissprot)	S329	IFAVTNYsYSYYEKL	2.64402
		Shc SH2	Src homology 2 group	0.4581	0.0076205	ITB4_HUMAN (swissprot)	Y333	TNYSYSYyEKLHTYF	2.1536
		PDK1 Binding	Kinase binding site group	0.6037	0.00946417	ITB4_HUMAN (swissprot)	E334	NYSYSYYeKLHTYFP	2.18673
		Akt Kinase	Basophilic serine/threonine kinase	0.5177	0.00426885	ITB4_HUMAN (swissprot)	S397	FQKTRTGsFHIRRGE	0.362274
		Abl Kinase	Tyrosine kinase group	0.4901	0.00887648	ITB4_HUMAN (swissprot)	Y408	RRGEVGIyQVQLRAL	0.554508
		Aurora A	Basophilic serine/threonine kinase	0.5368	0.00817891	ITB4_HUMAN (swissprot)	S469	EVRSARCsFNGDFVC	0.461422
		Aurora A	Basophilic serine/threonine kinase	0.4107	0.00156275	ITB4_HUMAN (swissprot)	S558	CNDRGRCsMGQCVCE	0.546871
		Aurora B	Basophilic serine/threonine kinase	0.5264	0.00624431	ITB4_HUMAN (swissprot)	S558	CNDRGRCsMGQCVCE	0.546871
		PKC epsilon	Basophilic serine/threonine kinase	0.4408	0.00950564	ITB4_HUMAN (swissprot)	S672	EEVVVRCsFRDEDDD	0.913232
		Casein Kinase 1	Acidophilic serine/threonine kinase group	0.3947	0.00573774	ITB4_HUMAN (swissprot)	T681	RDEDDDCtYSYTMEG	0.974114
		PLK1 Kinase	Acidophilic serine/threonine kinase group	0.3232	0.00699137	ITB4_HUMAN (swissprot)	T681	RDEDDDCtYSYTMEG	0.974114
		PDK1 Binding	Kinase binding site group	0.6019	0.00926133	ITB4_HUMAN (swissprot)	S683	EDDDCTYsYTMEGDG	1.55414
		PIP3-binding PH	Lipid binding group	0.6555	0.00353059	ITB4_HUMAN (swissprot)	F757	NRGHMVGfKEDHYML	0.843027
		PLK1 Kinase	Acidophilic serine/threonine kinase group	0.2929	0.00382547	ITB4_HUMAN (swissprot)	T882	AGKKQDHtIVDTVLM	0.652989
		PDK1 Binding	Kinase binding site group	0.5709	0.00583944	ITB4_HUMAN (swissprot)	E998	VVSFEQPeFSVSRGD	0.915372
		ATM Kinase	DNA damage kinase group	0.5019	0.00767721	ITB4_HUMAN (swissprot)	S1022	RVLDGGKsQVSYRTQ	1.04697
		PKC zeta	Basophilic serine/threonine kinase	0.4712	0.00684297	ITB4_HUMAN (swissprot)	S1084	RRFHVQLsNPKFGAH	2.26508
		PLK1 Kinase	Acidophilic serine/threonine kinase group	0.272	0.0024023	ITB4_HUMAN (swissprot)	S1111	DPDELDRsFTSQMLS	1.68227
		AMP_Kinase	Basophilic serine/threonine kinase	0.5361	0.00202318	ITB4_HUMAN (swissprot)	T1113	DELDRSFtSQMLSSQ	0.881469
		Akt Kinase	Basophilic serine/threonine kinase	0.5392	0.00580736	ITB4_HUMAN (swissprot)	S1325	TQPKRPMsIPIIPDI	0.357065
		Calmodulin dependent Kinase 2	Basophilic serine/threonine kinase	0.3993	0.00114949	ITB4_HUMAN (swissprot)	S1325	TQPKRPMsIPIIPDI	0.357065
		Erk D-domain	Kinase binding site group	0.5062	0.00235422	ITB4_HUMAN (swissprot)	I1328	KRPMSIPiIPDIPIV	0.315179
		Insulin Receptor Kinase	Tyrosine kinase group	0.6137	0.00822985	ITB4_HUMAN (swissprot)	Y1343	DAQSGEDyDSFLMYS	2.01251
		Protein Kinase A	Basophilic serine/threonine kinase	0.2911	0.00100308	ITB4_HUMAN (swissprot)	T1389	ELDLRRVtWRLPPEL	0.816565
		Aurora B	Basophilic serine/threonine kinase	0.5553	0.00852727	ITB4_HUMAN (swissprot)	S1401	PELIPRLsASSGRSS	0.899979
		GSK3-improved	Acidophilic serine/threonine kinase group	0.4173	0.00398421	ITB4_HUMAN (swissprot)	S1404	IPRLSASsGRSSDAE	1.07997
		14-3-3 Mode 1	Phosphoserine/threonine binding group	0.4346	0.0076906	ITB4_HUMAN (swissprot)	T1434	GSLPRSAtPGPPGEH	1.05946
		CDK1 motif 2 - [ST]PxxK	Proline-dependent serine/threonine kinase group	0.4334	0.00867452	ITB4_HUMAN (swissprot)	T1434	GSLPRSAtPGPPGEH	1.05946
		Erk1 Binding	Kinase binding site group	0.2094	0.00097975	ITB4_HUMAN (swissprot)	P1452	GRMDFAFpGSTNSLH	0.593297
		Cbl-Associated protein C-SH3	Src homology 3 group	0.5875	0.00181965	ITB4_HUMAN (swissprot)	P1478	THLSPHVpHRVLSTS	0.70793
		Intersectin SH3A	Src homology 3 group	0.586	0.00307722	ITB4_HUMAN (swissprot)	P1478	THLSPHVpHRVLSTS	0.70793
		p85 SH3 mode2	Src homology 3 group	0.6037	0.00904101	ITB4_HUMAN (swissprot)	P1478	THLSPHVpHRVLSTS	0.70793
		14-3-3 Mode 1	Phosphoserine/threonine binding group	0.4333	0.00757681	ITB4_HUMAN (swissprot)	T1505	SEHSHSTtLPRDYST	1.5976
		Aurora A	Basophilic serine/threonine kinase	0.5347	0.00796	ITB4_HUMAN (swissprot)	T1524	SSHDSRLtAGVPDTP	0.3964
		Aurora B	Basophilic serine/threonine kinase	0.4233	0.00135083	ITB4_HUMAN (swissprot)	T1524	SSHDSRLtAGVPDTP	0.3964
		Cdc2 Kinase	Proline-dependent serine/threonine kinase group	0.4606	0.00380914	ITB4_HUMAN (swissprot)	T1530	LTAGVPDtPTRLVFS	3.73284
		CDK1 motif 1 - [ST]Px[KR]x	Proline-dependent serine/threonine kinase group	0.2718	0.00173601	ITB4_HUMAN (swissprot)	T1530	LTAGVPDtPTRLVFS	3.73284
		CDK1 motif 2 - [ST]PxxK	Proline-dependent serine/threonine kinase group	0.4189	0.007113	ITB4_HUMAN (swissprot)	T1530	LTAGVPDtPTRLVFS	3.73284
		SHIP SH2	Src homology 2 group	0.418	0.00963221	ITB4_HUMAN (swissprot)	Y1564	LQGYSVEyQLLNGGE	0.543635
		Shc PTB	Phosphotyrosine binding group	0.5099	0.00422353	ITB4_HUMAN (swissprot)	Y1596	DLLPNHSyVFRVRAQ	0.82425
		Erk1 Kinase	Proline-dependent serine/threonine kinase group	0.5205	0.0089635	ITB4_HUMAN (swissprot)	S1626	ESQVHPQsPLCPLPG	0.562162
		p38 MAPK	Proline-dependent serine/threonine kinase group	0.2518	0.000502142	ITB4_HUMAN (swissprot)	S1626	ESQVHPQsPLCPLPG	0.562162
		Amphiphysin SH3	Src homology 3 group	0.4962	0.00224341	ITB4_HUMAN (swissprot)	P1664	LQLSWERpRRPNGDI	7.12993
		Aurora B	Basophilic serine/threonine kinase	0.5685	0.00962999	ITB4_HUMAN (swissprot)	T1702	DSPESRLtVPGLSEN	0.606735
		Aurora B	Basophilic serine/threonine kinase	0.5289	0.00643452	ITB4_HUMAN (swissprot)	T1721	FKVQARTtEGFGPER	1.3874
		ATM Kinase	DNA damage kinase group	0.5069	0.00837875	ITB4_HUMAN (swissprot)	T1733	PEREGIItIESQDGG	0.264387
		DNA PK	DNA damage kinase group	0.4983	0.00707016	ITB4_HUMAN (swissprot)	S1736	EGIITIEsQDGGPFP	1.06706
		ATM Kinase	DNA damage kinase group	0.4364	0.00219633	ITB4_HUMAN (swissprot)	T1797	GSLTRHVtQEFVSRT	0.867491
Integrin Beta 5	P18084	Abl Kinase	Tyrosine kinase group	0.4158	0.00243002	ITB5_HUMAN (swissprot)	Y9	PRAPAPLyACLLGLC	0.204492
		p85 SH2	Src homology 2 group	0.5024	0.00811764	ITB5_HUMAN (swissprot)	Y141	EDYPVDLyYLMDLSL	0.632392
		Aurora B	Basophilic serine/threonine kinase	0.4787	0.00323711	ITB5_HUMAN (swissprot)	T172	AEEMRKLtSNFRLGF	1.05704
		AMP_Kinase	Basophilic serine/threonine kinase	0.5456	0.00241568	ITB5_HUMAN (swissprot)	S173	EEMRKLTsNFRLGFG	1.03524
		PDK1 Binding	Kinase binding site group	0.5201	0.00173783	ITB5_HUMAN (swissprot)	S191	DKDISPFsYTAPRYQ	0.939386
		Abl SH2	Src homology 2 group	0.4256	0.00533055	ITB5_HUMAN (swissprot)	Y192	KDISPFSyTAPRYQT	0.939386
		14-3-3 Mode 1	Phosphoserine/threonine binding group	0.3939	0.00476188	ITB5_HUMAN (swissprot)	T199	YTAPRYQtNPCIGYK	1.24229
		Akt Kinase	Basophilic serine/threonine kinase	0.4634	0.00184174	ITB5_HUMAN (swissprot)	S229	PLTDRVDsFNEEVRK	0.953295
		PDK1 Binding	Kinase binding site group	0.5644	0.00513487	ITB5_HUMAN (swissprot)	T349	YMLYKNFtALIPGTT	0.279306
		Aurora B	Basophilic serine/threonine kinase	0.5195	0.00573075	ITB5_HUMAN (swissprot)	T438	RSCPSRHtEHVFALR	1.54171
		PLCg N-terminal SH2	Src homology 2 group	0.3659	0.00760989	ITB5_HUMAN (swissprot)	Y696	DCVMMFTyVELPSGK	0.475681
		Shc PTB	Phosphotyrosine binding group	0.5134	0.00448344	ITB5_HUMAN (swissprot)	Y774	EMASNPLyRKPISTH	2.77335
		PDK1 Binding	Kinase binding site group	0.5781	0.00661989	ITB5_HUMAN (swissprot)	T786	STHTVDFtFNKFNKS	1.38309
Integrin Beta 6	P18564	ATM Kinase	DNA damage kinase group	0.4462	0.00267442	ITB6_HUMAN (swissprot)	S80	NFIENPVsQVEILKN	0.784605
		DNA PK	DNA damage kinase group	0.4608	0.00372631	ITB6_HUMAN (swissprot)	S80	NFIENPVsQVEILKN	0.784605
		p85 SH2	Src homology 2 group	0.5024	0.00811764	ITB6_HUMAN (swissprot)	Y136	EDYPVDLyYLMDLSA	0.632392
		SHIP SH2	Src homology 2 group	0.4142	0.00903855	ITB6_HUMAN (swissprot)	Y202	NPCSSIPyFCLPTFG	0.148987
		PLK1 Kinase	Acidophilic serine/threonine kinase group	0.3318	0.00810956	ITB6_HUMAN (swissprot)	S302	LDSKNEYsMSTVLEY	1.59504
		Casein Kinase 1	Acidophilic serine/threonine kinase group	0.4169	0.00983629	ITB6_HUMAN (swissprot)	T305	KNEYSMStVLEYPTI	0.464951
		ATM Kinase	DNA damage kinase group	0.5115	0.00902416	ITB6_HUMAN (swissprot)	T331	VLLIFAVtQEQVHLY	1.28809
		Src SH2	Src homology 2 group	0.3996	0.00776583	ITB6_HUMAN (swissprot)	Y368	LQLIISAyEELRSEV	1.20241
		PLK1 Kinase	Acidophilic serine/threonine kinase group	0.3015	0.0045981	ITB6_HUMAN (swissprot)	S389	DTEGLNLsFTAICNN	0.533967
		Erk D-domain	Kinase binding site group	0.5028	0.00223744	ITB6_HUMAN (swissprot)	I435	RRSRHIIiKPVGLGD	0.181169
		Src Kinase	Tyrosine kinase group	0.4916	0.00724516	ITB6_HUMAN (swissprot)	Y533	LSPYGNIyGPYCQCD	1.00787
		Shc PTB	Phosphotyrosine binding group	0.495	0.00311709	ITB6_HUMAN (swissprot)	Y762	QTGTNPLyRGSTSTF	1.18939
		PKC alpha/beta/gamma	Basophilic serine/threonine kinase	0.4317	0.00642585	ITB6_HUMAN (swissprot)	T773	TSTFKNVtYKHREKQ	1.74794
		PDK1 Binding	Kinase binding site group	0.5698	0.00572021	ITB6_HUMAN (swissprot)	T773	TSTFKNVtYKHREKQ	1.74794
Integrin Beta 7	P26010	p85 SH2	Src homology 2 group	0.5024	0.00811764	ITB7_HUMAN (swissprot)	Y155	EGYPVDLyYLMDLSY	0.632392
		PLK1 Kinase	Acidophilic serine/threonine kinase group	0.3396	0.00922629	ITB7_HUMAN (swissprot)	S161	LYYLMDLsYSMKDDL	0.8789
		PLK1 Kinase	Acidophilic serine/threonine kinase group	0.2319	0.00075691	ITB7_HUMAN (swissprot)	T291	LVFTSDDtFHTAGDG	1.56845
		PDK1 Binding	Kinase binding site group	0.5561	0.00423518	ITB7_HUMAN (swissprot)	D326	YSRSTEFdYPSVGQV	1.86344
		Erk1 Binding	Kinase binding site group	0.3396	0.00270874	ITB7_HUMAN (swissprot)	P328	RSTEFDYpSVGQVAQ	0.912703
		Lck SH2	Src homology 2 group	0.4017	0.0082996	ITB7_HUMAN (swissprot)	Y356	TSAALPVyQELSKLI	1.01932
		Src SH2	Src homology 2 group	0.3785	0.00527536	ITB7_HUMAN (swissprot)	Y356	TSAALPVyQELSKLI	1.01932
		Cdc2 Kinase	Proline-dependent serine/threonine kinase group	0.5125	0.00868474	ITB7_HUMAN (swissprot)	T643	DQCPGCKtPCERHRD	0.508944
		Cdk5 Kinase	Proline-dependent serine/threonine kinase group	0.4634	0.00753513	ITB7_HUMAN (swissprot)	T643	DQCPGCKtPCERHRD	0.508944
		Clk2 Kinase	Basophilic serine/threonine kinase	0.5715	0.00275791	ITB7_HUMAN (swissprot)	S759	IYDRREYsRFEKEQQ	2.44777
		Shc PTB	Phosphotyrosine binding group	0.5501	0.00940652	ITB7_HUMAN (swissprot)	Y778	KQDSNPLyKSAITTT	1.23973
Integrin Beta 8	P26012	DNA PK	DNA damage kinase group	0.5082	0.00820631	ITB8_HUMAN (swissprot)	T116	PTENEINtQVTPGEV	0.718215
		PLCg N-terminal SH2	Src homology 2 group	0.3459	0.00547942	ITB8_HUMAN (swissprot)	Y199	VDKTVSPyISIHPER	0.489973
		Grb2 SH3	Src homology 3 group	0.4519	0.00471377	ITB8_HUMAN (swissprot)	P356	HWYKDLLpLLPGTIA	0.25344
		PLCg C-terminal SH2	Src homology 2 group	0.4287	0.00969951	ITB8_HUMAN (swissprot)	Y447	DVTGGKNyAIIKPIG	0.595301
		PKC alpha/beta/gamma	Basophilic serine/threonine kinase	0.4005	0.00317014	ITB8_HUMAN (swissprot)	T743	SVCTRAVtYRREKPE	1.49063
Syndecan-4	P31431	PLK1 Kinase	Acidophilic serine/threonine kinase group	0.3291	0.00773447	SDC4_HUMAN (swissprot)	S72	DLDDLEDsMIGPEVV	0.60975
		Protein Kinase A	Basophilic serine/threonine kinase	0.4632	0.0091774	SDC4_HUMAN (swissprot)	S117	EVIPKRIsPVEESED	0.838053
Urokinase Plasminogen Activator Receptor (uPAR)	P00749	Erk D-domain	Kinase binding site group	0.5746	0.00611662	UROK_HUMAN (swissprot)	V135	RRRPWCYvQVGLKPL	0.181729
		Akt Kinase	Basophilic serine/threonine kinase	0.4278	0.00101862	UROK_HUMAN (swissprot)	S204	YRRHRGGsVTYVCGG	0.504804
		Clk2 Kinase	Basophilic serine/threonine kinase	0.6924	0.00933767	UROK_HUMAN (swissprot)	S204	YRRHRGGsVTYVCGG	0.504804
		PKC delta	Basophilic serine/threonine kinase	0.3664	0.00237048	UROK_HUMAN (swissprot)	S204	YRRHRGGsVTYVCGG	0.504804
		Erk D-domain	Kinase binding site group	0.555	0.00472508	UROK_HUMAN (swissprot)	V205	RRHRGGSvTYVCGGS	0.378603
		Fgr Kinase	Tyrosine kinase group	0.4023	0.0048265	UROK_HUMAN (swissprot)	Y235	DYPKKEDyIVYLGRS	0.846614
		Akt Kinase	Basophilic serine/threonine kinase	0.5572	0.00751436	UROK_HUMAN (swissprot)	S246	LGRSRLNsNTQGEMK	1.76536
		Erk1 Binding	Kinase binding site group	0.4722	0.00456839	UROK_HUMAN (swissprot)	P329	NSTDYLYpEQLKMTV	1.13257
		Aurora A	Basophilic serine/threonine kinase	0.4738	0.00374937	UROK_HUMAN (swissprot)	T389	CSLQGRMtLTGIVSW	0.755048
SHP-2 Substrate 1 (SHPS-1)	P78324	Erk D-domain	Kinase binding site group	0.6002	0.00864574	SHPS1_HUMAN (swissprot)	L17	RLGPLLClLLAASCA	0.0574013
		PKC delta	Basophilic serine/threonine kinase	0.4105	0.00798397	SHPS1_HUMAN (swissprot)	S59	TLRCTATsLIPVGPI	0.40024
		Akt Kinase	Basophilic serine/threonine kinase	0.4941	0.00301551	SHPS1_HUMAN (swissprot)	T92	GHFPRVTtVSDLTKR	0.588453
		AMP_Kinase	Basophilic serine/threonine kinase	0.493	0.00085326	SHPS1_HUMAN (swissprot)	T92	GHFPRVTtVSDLTKR	0.588453
		Protein Kinase A	Basophilic serine/threonine kinase	0.4034	0.00517859	SHPS1_HUMAN (swissprot)	S128	CVKFRKGsPDDVEFK	2.62102
		Erk D-domain	Kinase binding site group	0.602	0.00887814	SHPS1_HUMAN (swissprot)	L142	KSGAGTElSVRAKPS	0.920215
		Cdk5 Kinase	Proline-dependent serine/threonine kinase group	0.452	0.00642781	SHPS1_HUMAN (swissprot)	T161	SGPAARAtPQHTVSF	2.3846
		Erk D-domain	Kinase binding site group	0.5485	0.00429312	SHPS1_HUMAN (swissprot)	L283	RKFYPQRlQLTWLEN	1.32133
		Akt Kinase	Basophilic serine/threonine kinase	0.5609	0.00787751	SHPS1_HUMAN (swissprot)	T298	GNVSRTEtASTVTEN	1.61509
		14-3-3 Mode 1	Phosphoserine/threonine binding group	0.4334	0.00758556	SHPS1_HUMAN (swissprot)	T298	GNVSRTEtASTVTEN	1.61509
		Casein Kinase 1	Acidophilic serine/threonine kinase group	0.3572	0.00209745	SHPS1_HUMAN (swissprot)	T301	SRTETAStVTENKDG	0.830615
		Erk D-domain	Kinase binding site group	0.5927	0.00787615	SHPS1_HUMAN (swissprot)	V349	SKSHDLKvSAHPKEQ	0.516774
		PLK1 Kinase	Acidophilic serine/threonine kinase group	0.3305	0.00792344	SHPS1_HUMAN (swissprot)	T428	TQDTNDItYADLNLP	1.02346
		SHIP SH2	Src homology 2 group	0.2835	0.000419952	SHPS1_HUMAN (swissprot)	Y429	QDTNDITyADLNLPK	0.505411
		Fgr Kinase	Tyrosine kinase group	0.4213	0.00718806	SHPS1_HUMAN (swissprot)	Y429	QDTNDITyADLNLPK	0.505411
		Itk SH2	Src homology 2 group	0.468	0.00724131	SHPS1_HUMAN (swissprot)	Y453	EPNNHTEyASIQTSP	0.85171
		PLK1 Kinase	Acidophilic serine/threonine kinase group	0.2548	0.00153784	SHPS1_HUMAN (swissprot)	T467	PQPASEDtLTYADLD	1.7838
		PKC epsilon	Basophilic serine/threonine kinase	0.4149	0.00525786	SHPS1_HUMAN (swissprot)	S492	PAPKPEPsFSEYASV	1.65276
Talin	Q9Y490	PKC epsilon	Basophilic serine/threonine kinase	0.4045	0.00396419	TLN1_HUMAN (swissprot)	S22	KTMQFEPsTMVYDAC	0.871783
		ATM Kinase	DNA damage kinase group	0.4879	0.00595545	TLN1_HUMAN (swissprot)	S52	SDFGLFLsDDDPKKG	1.02139
		PKC alpha/beta/gamma	Basophilic serine/threonine kinase	0.3806	0.00205411	TLN1_HUMAN (swissprot)	T144	KKEEITGtLRKDKTL	1.52583
		Protein Kinase A	Basophilic serine/threonine kinase	0.4504	0.00818194	TLN1_HUMAN (swissprot)	T150	GTLRKDKtLLRDEKK	1.47133
		PKC alpha/beta/gamma	Basophilic serine/threonine kinase	0.4392	0.00752584	TLN1_HUMAN (swissprot)	T150	GTLRKDKtLLRDEKK	1.47133
		AMP_Kinase	Basophilic serine/threonine kinase	0.6129	0.00827276	TLN1_HUMAN (swissprot)	T150	GTLRKDKtLLRDEKK	1.47133
		AMP_Kinase	Basophilic serine/threonine kinase	0.5933	0.00588888	TLN1_HUMAN (swissprot)	S405	IILKKKKsKDHFGLE	5.58175
		Casein Kinase 2	Acidophilic serine/threonine kinase group	0.4378	0.00466516	TLN1_HUMAN (swissprot)	S417	GLEGDEEsTMLEDSV	1.08489
		Cdk5 Kinase	Proline-dependent serine/threonine kinase group	0.4388	0.00540187	TLN1_HUMAN (swissprot)	S425	TMLEDSVsPKKSTVL	1.88906
		PKC mu	Basophilic serine/threonine kinase	0.4225	0.00570205	TLN1_HUMAN (swissprot)	S688	ALVLKAKsVAQRTED	0.805697
		Casein Kinase 1	Acidophilic serine/threonine kinase group	0.3957	0.00586296	TLN1_HUMAN (swissprot)	S1055	LEMDSALsVVQNLEK	0.244099
		DNA PK	DNA damage kinase group	0.4552	0.00342913	TLN1_HUMAN (swissprot)	S1181	GHPGDPEsQQRLAQV	4.83113
		Calmodulin dependent Kinase 2	Basophilic serine/threonine kinase	0.4351	0.00258686	TLN1_HUMAN (swissprot)	S1225	DASKRLLsDSLPPST	0.385482
		Akt Kinase	Basophilic serine/threonine kinase	0.5367	0.00561878	TLN1_HUMAN (swissprot)	S1227	SKRLLSDsLPPSTGT	1.35521
		Erk D-domain	Kinase binding site group	0.5584	0.00495103	TLN1_HUMAN (swissprot)	L1228	KRLLSDSlPPSTGTF	1.35521
		ATM Kinase	DNA damage kinase group	0.5048	0.0080841	TLN1_HUMAN (swissprot)	S1294	EMAGQAPsQEDRAQV	2.40285
		DNA PK	DNA damage kinase group	0.4698	0.00442309	TLN1_HUMAN (swissprot)	S1294	EMAGQAPsQEDRAQV	2.40285
		Cbl-Associated protein C-SH3	Src homology 3 group	0.7057	0.00834914	TLN1_HUMAN (swissprot)	P1329	LSTDPAApNLKSQLA	0.996054
		PLK1 Kinase	Acidophilic serine/threonine kinase group	0.3012	0.00456808	TLN1_HUMAN (swissprot)	S1388	VQPINDMsYFGCLDS	0.681485
		14-3-3 Mode 1	Phosphoserine/threonine binding group	0.2759	0.000750706	TLN1_HUMAN (swissprot)	T1562	RAQCRAAtAPLLEAV	0.434831
		Cbl-Associated protein C-SH3	Src homology 3 group	0.7148	0.00937192	TLN1_HUMAN (swissprot)	P1627	LAVNPRDpPSWSVLA	2.52538
		DNA PK	DNA damage kinase group	0.4935	0.00656914	TLN1_HUMAN (swissprot)	S1694	LAPREGIsQEALHTQ	0.645507
		PKC epsilon	Basophilic serine/threonine kinase	0.4149	0.00525786	TLN1_HUMAN (swissprot)	T1767	ALLDQTKtLAESALQ	1.37726
		ATM Kinase	DNA damage kinase group	0.4815	0.00530632	TLN1_HUMAN (swissprot)	T1792	NPKQAAHtQEALEEA	1.37754
		DNA PK	DNA damage kinase group	0.4761	0.00493602	TLN1_HUMAN (swissprot)	T1792	NPKQAAHtQEALEEA	1.37754
		14-3-3 Mode 1	Phosphoserine/threonine binding group	0.4289	0.00719167	TLN1_HUMAN (swissprot)	T1877	EMVTKSNtSPEELGP	2.65621
		PLK1 Kinase	Acidophilic serine/threonine kinase group	0.1827	0.0001433	TLN1_HUMAN (swissprot)	T1995	IIADLDTtIMFATAG	0.47881
		PKC mu	Basophilic serine/threonine kinase	0.4335	0.00685799	TLN1_HUMAN (swissprot)	T2030	AKVLVEDtKVLVQNA	1.17087
		DNA PK	DNA damage kinase group	0.4935	0.00656914	TLN1_HUMAN (swissprot)	S2040	LVQNAAGsQEKLAQA	1.84159
		ATM Kinase	DNA damage kinase group	0.4521	0.00298148	TLN1_HUMAN (swissprot)	T2076	LGAEDPEtQVVLINA	0.844959
		DNA PK	DNA damage kinase group	0.4523	0.00327524	TLN1_HUMAN (swissprot)	T2076	LGAEDPEtQVVLINA	0.844959
		Cbl-Associated protein C-SH3	Src homology 3 group	0.6341	0.00324374	TLN1_HUMAN (swissprot)	P2166	VFCSPEPpAKTSTPE	2.76682
		PLCg N-terminal SH2	Src homology 2 group	0.3211	0.00344197	TLN1_HUMAN (swissprot)	Y2247	GRECANGyLELLDHV	0.698959
		ATM Kinase	DNA damage kinase group	0.4213	0.00159945	TLN1_HUMAN (swissprot)	S2420	AAVQGHAsQEKLISS	2.53219
		DNA PK	DNA damage kinase group	0.4041	0.00137946	TLN1_HUMAN (swissprot)	S2420	AAVQGHAsQEKLISS	2.53219
Filamin	P21333	Cdk5 Kinase	Proline-dependent serine/threonine kinase group	0.452	0.00642781	FLNA_HUMAN (swissprot)	T167	DEEAKKQtPKQRLLG	6.13443
		Itk SH3	Src homology 3 group	0.5614	0.00376378	FLNA_HUMAN (swissprot)	P271	FPKAKLKpGAPLRPK	0.90345
		p85 SH3 mode1	Src homology 3 group	0.4539	0.000824646	FLNA_HUMAN (swissprot)	P271	FPKAKLKpGAPLRPK	0.90345
		Intersectin SH3A	Src homology 3 group	0.5689	0.00248361	FLNA_HUMAN (swissprot)	P274	AKLKPGApLRPKLNP	0.884822
		p85 SH3 mode1	Src homology 3 group	0.5862	0.00849597	FLNA_HUMAN (swissprot)	P274	AKLKPGApLRPKLNP	0.884822
		p85 SH3 mode2	Src homology 3 group	0.3921	0.000159518	FLNA_HUMAN (swissprot)	P274	AKLKPGApLRPKLNP	0.884822
		PLK1 Kinase	Acidophilic serine/threonine kinase group	0.328	0.00759592	FLNA_HUMAN (swissprot)	T341	ANNDKNRtFSVWYVP	0.931718
		Akt Kinase	Basophilic serine/threonine kinase	0.5318	0.00524915	FLNA_HUMAN (swissprot)	S343	NDKNRTFsVWYVPEV	0.46931
		Src SH2	Src homology 2 group	0.4029	0.00823545	FLNA_HUMAN (swissprot)	Y403	NIANKTTyFEIFTAG	0.786194
		PDK1 Binding	Kinase binding site group	0.5359	0.00276055	FLNA_HUMAN (swissprot)	T408	TTYFEIFtAGAGTGE	0.202755
		PDK1 Binding	Kinase binding site group	0.5763	0.00642478	FLNA_HUMAN (swissprot)	T507	TADFKVYtKGAGSGE	0.769017
		Lck Kinase	Tyrosine kinase group	0.4841	0.00879943	FLNA_HUMAN (swissprot)	Y538	KDLGDGVyGFEYYPM	0.391417
		PDK1 Binding	Kinase binding site group	0.5543	0.00406343	FLNA_HUMAN (swissprot)	E541	GDGVYGFeYYPMVPG	1.29113
		p85 SH2	Src homology 2 group	0.4583	0.00528594	FLNA_HUMAN (swissprot)	Y542	DGVYGFEyYPMVPGT	1.29113
		Insulin Receptor Kinase	Tyrosine kinase group	0.5438	0.00226071	FLNA_HUMAN (swissprot)	Y542	DGVYGFEyYPMVPGT	1.29113
		Cbl-Associated protein C-SH3	Src homology 3 group	0.6854	0.00631595	FLNA_HUMAN (swissprot)	P740	CSYVPRKpVKHTAMV	2.80342
		Cdc2 Kinase	Proline-dependent serine/threonine kinase group	0.5133	0.00877941	FLNA_HUMAN (swissprot)	S757	GGVSIPNsPFRVNVG	2.07973
		PKC delta	Basophilic serine/threonine kinase	0.3906	0.00446428	FLNA_HUMAN (swissprot)	T790	GLKAHEPtYFTVDCA	1.73425
		PKC epsilon	Basophilic serine/threonine kinase	0.4311	0.0077033	FLNA_HUMAN (swissprot)	T790	GLKAHEPtYFTVDCA	1.73425
		Fgr Kinase	Tyrosine kinase group	0.4163	0.00656659	FLNA_HUMAN (swissprot)	Y791	LKAHEPTyFTVDCAE	0.743251
		Insulin Receptor Kinase	Tyrosine kinase group	0.6139	0.00825848	FLNA_HUMAN (swissprot)	Y846	TPRGAGSyTIMVLFA	0.476759
		Cdc2 Kinase	Proline-dependent serine/threonine kinase group	0.4684	0.00442716	FLNA_HUMAN (swissprot)	S860	ADQATPTsPIRVKVE	1.45495
		Cdk5 Kinase	Proline-dependent serine/threonine kinase group	0.4502	0.00628791	FLNA_HUMAN (swissprot)	S860	ADQATPTsPIRVKVE	1.45495
		CDK1 motif 1 - [ST]Px[KR]x	Proline-dependent serine/threonine kinase group	0.335	0.00380436	FLNA_HUMAN (swissprot)	S860	ADQATPTsPIRVKVE	1.45495
		p85 SH3 mode2	Src homology 3 group	0.5801	0.00642049	FLNA_HUMAN (swissprot)	P861	DQATPTSpIRVKVEP	0.698378
		PLK1 Kinase	Acidophilic serine/threonine kinase group	0.3236	0.00704175	FLNA_HUMAN (swissprot)	T932	IIDHHDNtYTVKYTP	1.54809
		GSK3 Kinase	Acidophilic serine/threonine kinase group	0.5236	0.00967495	FLNA_HUMAN (swissprot)	S962	PIPKSPFsVAVSPSL	0.228843
		GSK3-improved	Acidophilic serine/threonine kinase group	0.4716	0.00991182	FLNA_HUMAN (swissprot)	S962	PIPKSPFsVAVSPSL	0.228843
		Erk D-domain	Kinase binding site group	0.6072	0.00954951	FLNA_HUMAN (swissprot)	V965	KSPFSVAvSPSLDLS	0.354162
		GSK3 Kinase	Acidophilic serine/threonine kinase group	0.4549	0.00256703	FLNA_HUMAN (swissprot)	S966	SPFSVAVsPSLDLSK	0.393513
		Fgr SH2	Src homology 2 group	0.4375	0.00602701	FLNA_HUMAN (swissprot)	Y1047	PYEVEVTyDGVPVPG	0.471797
		Nck SH2	Src homology 2 group	0.4537	0.00703264	FLNA_HUMAN (swissprot)	Y1047	PYEVEVTyDGVPVPG	0.471797
		Shc SH2	Src homology 2 group	0.4496	0.00642947	FLNA_HUMAN (swissprot)	Y1047	PYEVEVTyDGVPVPG	0.471797
		SHIP SH2	Src homology 2 group	0.3013	0.000704284	FLNA_HUMAN (swissprot)	Y1047	PYEVEVTyDGVPVPG	0.471797
		Erk1 Kinase	Proline-dependent serine/threonine kinase group	0.5225	0.0092276	FLNA_HUMAN (swissprot)	S1055	DGVPVPGsPFPLEAV	0.972972
		Cdc2 Kinase	Proline-dependent serine/threonine kinase group	0.4624	0.00395176	FLNA_HUMAN (swissprot)	S1084	LQGGSAGsPARFTID	0.939386
		Cdk5 Kinase	Proline-dependent serine/threonine kinase group	0.4707	0.00824898	FLNA_HUMAN (swissprot)	S1084	LQGGSAGsPARFTID	0.939386
		CDK1 motif 1 - [ST]Px[KR]x	Proline-dependent serine/threonine kinase group	0.3404	0.00399222	FLNA_HUMAN (swissprot)	S1084	LQGGSAGsPARFTID	0.939386
		Aurora A	Basophilic serine/threonine kinase	0.5513	0.00979748	FLNA_HUMAN (swissprot)	T1089	AGSPARFtIDTKGAG	0.947645
		Cdc2 Kinase	Proline-dependent serine/threonine kinase group	0.4581	0.00365913	FLNA_HUMAN (swissprot)	S1148	ADTHIPGsPFKAHVV	1.25838
		Cdk5 Kinase	Proline-dependent serine/threonine kinase group	0.4455	0.00592261	FLNA_HUMAN (swissprot)	S1148	ADTHIPGsPFKAHVV	1.25838
		CDK1 motif 1 - [ST]Px[KR]x	Proline-dependent serine/threonine kinase group	0.3794	0.00550024	FLNA_HUMAN (swissprot)	S1148	ADTHIPGsPFKAHVV	1.25838
		PLCg N-terminal SH2	Src homology 2 group	0.3786	0.00973578	FLNA_HUMAN (swissprot)	Y1221	DGTHTITyIPLCPGA	0.324716
		SHIP SH2	Src homology 2 group	0.3887	0.0052812	FLNA_HUMAN (swissprot)	Y1221	DGTHTITyIPLCPGA	0.324716
		PKC delta	Basophilic serine/threonine kinase	0.397	0.00501801	FLNA_HUMAN (swissprot)	T1232	CPGAYTVtIKYGGQP	0.778172
		Cortactin SH3	Src homology 3 group	0.5524	0.00598814	FLNA_HUMAN (swissprot)	P1241	KYGGQPVpNFPSKLQ	0.909355
		PLK1 Kinase	Acidophilic serine/threonine kinase group	0.3165	0.00618818	FLNA_HUMAN (swissprot)	T1334	GLHSVDVtYDGSPVP	1.06154
		Erk1 Kinase	Proline-dependent serine/threonine kinase group	0.5197	0.00885786	FLNA_HUMAN (swissprot)	S1343	DGSPVPSsPFQVPVT	1.47567
		PDK1 Binding	Kinase binding site group	0.6037	0.00946417	FLNA_HUMAN (swissprot)	E1418	SVEYIPYeAGTYSLN	1.3874
		PDK1 Binding	Kinase binding site group	0.59	0.00792028	FLNA_HUMAN (swissprot)	T1421	YIPYEAGtYSLNVTY	0.572578
		PLK1 Kinase	Acidophilic serine/threonine kinase group	0.3427	0.00973031	FLNA_HUMAN (swissprot)	T1427	GTYSLNVtYGGHQVP	0.629063
		Cdc2 Kinase	Proline-dependent serine/threonine kinase group	0.4896	0.00625057	FLNA_HUMAN (swissprot)	S1436	GGHQVPGsPFKVPVH	1.25838
		Cdk5 Kinase	Proline-dependent serine/threonine kinase group	0.4717	0.00834677	FLNA_HUMAN (swissprot)	S1436	GGHQVPGsPFKVPVH	1.25838
		CDK1 motif 1 - [ST]Px[KR]x	Proline-dependent serine/threonine kinase group	0.4309	0.00847114	FLNA_HUMAN (swissprot)	S1436	GGHQVPGsPFKVPVH	1.25838
		Cdc2 Kinase	Proline-dependent serine/threonine kinase group	0.4896	0.00625057	FLNA_HUMAN (swissprot)	S1533	GDEEVPRsPFKVKVL	2.49054
		Cdk5 Kinase	Proline-dependent serine/threonine kinase group	0.4457	0.00593816	FLNA_HUMAN (swissprot)	S1533	GDEEVPRsPFKVKVL	2.49054
		Aurora A	Basophilic serine/threonine kinase	0.4807	0.00407062	FLNA_HUMAN (swissprot)	T1617	PDVTGRYtILIKYGG	0.411307
		Cdc2 Kinase	Proline-dependent serine/threonine kinase group	0.4854	0.00584723	FLNA_HUMAN (swissprot)	S1630	GGDEIPFsPYRVRAV	1.95135
		Cdk5 Kinase	Proline-dependent serine/threonine kinase group	0.4559	0.00680172	FLNA_HUMAN (swissprot)	S1630	GGDEIPFsPYRVRAV	1.95135
		Cbl-Associated protein C-SH3	Src homology 3 group	0.684	0.00620996	FLNA_HUMAN (swissprot)	P1631	GDEIPFSpYRVRAVP	0.936648
		Grb2 SH2	Src homology 2 group	0.5301	0.00909775	FLNA_HUMAN (swissprot)	Y1862	PLQFYVDyVNCGHVT	0.295716
		PLCg N-terminal SH2	Src homology 2 group	0.3448	0.00537496	FLNA_HUMAN (swissprot)	Y1924	DGTCSVSyLPVLPGD	0.338038
		Src SH3	Src homology 3 group	0.4915	0.0093199	FLNA_HUMAN (swissprot)	P1926	TCSVSYLpVLPGDYS	0.433382
		Cdc2 Kinase	Proline-dependent serine/threonine kinase group	0.4887	0.00616414	FLNA_HUMAN (swissprot)	S1946	NEQHVPGsPFTARVT	0.908107
		Erk D-domain	Kinase binding site group	0.4869	0.00173474	FLNA_HUMAN (swissprot)	V2007	KRLRNGHvGISFVPK	0.212929
		PDK1 Binding	Kinase binding site group	0.5942	0.00839359	FLNA_HUMAN (swissprot)	E2067	GHTFEPAeFIIDTRD	0.263789
		ATM Kinase	DNA damage kinase group	0.5128	0.00920656	FLNA_HUMAN (swissprot)	S2083	GYGGLSLsIEGPSKV	0.407755
		Casein Kinase 2	Acidophilic serine/threonine kinase group	0.414	0.00323026	FLNA_HUMAN (swissprot)	T2094	PSKVDINtEDLEDGT	0.923419
		Cdc2 Kinase	Proline-dependent serine/threonine kinase group	0.5057	0.00788003	FLNA_HUMAN (swissprot)	S2128	ADQHVPGsPFSVKVT	0.843242
		Src SH3	Src homology 3 group	0.4727	0.00708992	FLNA_HUMAN (swissprot)	P2151	ITRRRRApSVANVGS	0.70454
		Akt Kinase	Basophilic serine/threonine kinase	0.4869	0.00268995	FLNA_HUMAN (swissprot)	S2152	TRRRRAPsVANVGSH	0.600713
		Clk2 Kinase	Basophilic serine/threonine kinase	0.6229	0.00450867	FLNA_HUMAN (swissprot)	S2152	TRRRRAPsVANVGSH	0.600713
		Protein Kinase A	Basophilic serine/threonine kinase	0.472	0.00999194	FLNA_HUMAN (swissprot)	S2152	TRRRRAPsVANVGSH	0.600713
		PKC delta	Basophilic serine/threonine kinase	0.3542	0.00139418	FLNA_HUMAN (swissprot)	S2152	TRRRRAPsVANVGSH	0.600713
		AMP_Kinase	Basophilic serine/threonine kinase	0.5049	0.00108779	FLNA_HUMAN (swissprot)	S2152	TRRRRAPsVANVGSH	0.600713
		Erk D-domain	Kinase binding site group	0.6072	0.00954951	FLNA_HUMAN (swissprot)	V2153	RRRRAPSvANVGSHC	0.44134
		CDK1 motif 2 - [ST]PxxK	Proline-dependent serine/threonine kinase group	0.2828	0.000920401	FLNA_HUMAN (swissprot)	S2180	DMTAQVTsPSGKTHE	0.674594
		Akt Kinase	Basophilic serine/threonine kinase	0.5375	0.00567913	FLNA_HUMAN (swissprot)	T2336	SGDARRLtVSSLQES	0.712071
		Calmodulin dependent Kinase 2	Basophilic serine/threonine kinase	0.4401	0.00285018	FLNA_HUMAN (swissprot)	T2336	SGDARRLtVSSLQES	0.712071
		Protein Kinase A	Basophilic serine/threonine kinase	0.2918	0.00101595	FLNA_HUMAN (swissprot)	T2336	SGDARRLtVSSLQES	0.712071
		Aurora A	Basophilic serine/threonine kinase	0.3716	0.000841775	FLNA_HUMAN (swissprot)	T2336	SGDARRLtVSSLQES	0.712071
		Aurora B	Basophilic serine/threonine kinase	0.3464	0.000387916	FLNA_HUMAN (swissprot)	T2336	SGDARRLtVSSLQES	0.712071
		PKC delta	Basophilic serine/threonine kinase	0.4178	0.00985391	FLNA_HUMAN (swissprot)	S2339	ARRLTVSsLQESGLK	0.755545
		Cdc2 Kinase	Proline-dependent serine/threonine kinase group	0.3843	0.000993825	FLNA_HUMAN (swissprot)	S2414	NGTHIPGsPFKIRVG	1.25838
		Cdk5 Kinase	Proline-dependent serine/threonine kinase group	0.3643	0.00161273	FLNA_HUMAN (swissprot)	S2414	NGTHIPGsPFKIRVG	1.25838
		CDK1 motif 1 - [ST]Px[KR]x	Proline-dependent serine/threonine kinase group	0.3947	0.00622748	FLNA_HUMAN (swissprot)	S2414	NGTHIPGsPFKIRVG	1.25838
		Cdc2 Kinase	Proline-dependent serine/threonine kinase group	0.4692	0.00449055	FLNA_HUMAN (swissprot)	S2510	GPYHIGGsPFKAKVT	0.805361
		Cdk5 Kinase	Proline-dependent serine/threonine kinase group	0.4223	0.00419703	FLNA_HUMAN (swissprot)	S2510	GPYHIGGsPFKAKVT	0.805361
		CDK1 motif 1 - [ST]Px[KR]x	Proline-dependent serine/threonine kinase group	0.4031	0.00664215	FLNA_HUMAN (swissprot)	S2510	GPYHIGGsPFKAKVT	0.805361
		PLK1 Kinase	Acidophilic serine/threonine kinase group	0.3022	0.00466813	FLNA_HUMAN (swissprot)	S2526	PRLVSNHsLHETSSV	1.35625
		PKC mu	Basophilic serine/threonine kinase	0.4419	0.00842114	FLNA_HUMAN (swissprot)	S2526	PRLVSNHsLHETSSV	1.35625
		AMP_Kinase	Basophilic serine/threonine kinase	0.6107	0.00798515	FLNA_HUMAN (swissprot)	S2526	PRLVSNHsLHETSSV	1.35625
		Akt Kinase	Basophilic serine/threonine kinase	0.5299	0.00510583	FLNA_HUMAN (swissprot)	S2615	HVGSRLYsVSYLLKD	0.618485
		Cdc2 Kinase	Proline-dependent serine/threonine kinase group	0.4092	0.00157385	FLNA_HUMAN (swissprot)	S2640	GDEHIPGsPYRVVVP	2.23011
		Cdk5 Kinase	Proline-dependent serine/threonine kinase group	0.4064	0.00317378	FLNA_HUMAN (swissprot)	S2640	GDEHIPGsPYRVVVP	2.23011
Alpha Actinin	P12814	AMP_Kinase	Basophilic serine/threonine kinase	0.5541	0.0028783	ACTN1_HUMAN (swissprot)	T50	SHLRKAGtQIENIEE	0.695161
		Erk D-domain	Kinase binding site group	0.5712	0.00580167	ACTN1_HUMAN (swissprot)	L67	RDGLKLMlLLEVISG	0.181666
		PLCg N-terminal SH2	Src homology 2 group	0.3799	0.00995339	ACTN1_HUMAN (swissprot)	Y215	AFDVAEKyLDIPKML	1.20061
		Shc SH2	Src homology 2 group	0.4256	0.00358821	ACTN1_HUMAN (swissprot)	Y279	NEQLMEDyEKLASDL	2.96621
		Aurora B	Basophilic serine/threonine kinase	0.521	0.0058424	ACTN1_HUMAN (swissprot)	T293	LLEWIRRtIPWLENR	1.446
		PKC epsilon	Basophilic serine/threonine kinase	0.3423	0.000565629	ACTN1_HUMAN (swissprot)	S404	EKFRQKAsIHEAWTD	1.02493
		Crk SH2	Src homology 2 group	0.4248	0.0061288	ACTN1_HUMAN (swissprot)	Y467	ELNELDYyDSPSVNA	3.25151
		Nck SH2	Src homology 2 group	0.3328	0.000491319	ACTN1_HUMAN (swissprot)	Y467	ELNELDYyDSPSVNA	3.25151
		Fyn SH2	Src homology 2 group	0.425	0.00514055	ACTN1_HUMAN (swissprot)	Y592	NMAGTNPyTTITPQE	1.35378
		ATM Kinase	DNA damage kinase group	0.5115	0.00902416	ACTN1_HUMAN (swissprot)	T663	ISIEMHGtLEDQLSH	1.06223
		DNA PK	DNA damage kinase group	0.4576	0.0035565	ACTN1_HUMAN (swissprot)	S744	TRDAKGIsQEQMNEF	1.10658
		PDK1 Binding	Kinase binding site group	0.56	0.00465792	ACTN1_HUMAN (swissprot)	D759	RASFNHFdRDHSGTL	2.00698
		Akt Kinase	Basophilic serine/threonine kinase	0.5318	0.00524915	ACTN1_HUMAN (swissprot)	T765	FDRDHSGtLGPEEFK	0.553513
		p85 SH2	Src homology 2 group	0.423	0.00347901	ACTN1_HUMAN (swissprot)	Y842	ILAGDKNyITMDELR	1.20061
		Insulin Receptor Kinase	Tyrosine kinase group	0.553	0.00261967	ACTN1_HUMAN (swissprot)	Y879	SVPGALDyMSFSTAL	0.567904
Tensin	Q9HBL0	Erk D-domain	Kinase binding site group	0.5212	0.00292113	TENS1_HUMAN (swissprot)	L70	RRPDITKlHAKVLEF	1.49953
		Erk1 Binding	Kinase binding site group	0.4918	0.00482209	TENS1_HUMAN (swissprot)	P80	KVLEFGWpDLHTPAL	0.690994
		PKC alpha/beta/gamma	Basophilic serine/threonine kinase	0.4333	0.00666051	TENS1_HUMAN (swissprot)	S176	FSGLLSGsIKMNNKP	0.565031
		Crk SH2	Src homology 2 group	0.3862	0.00283255	TENS1_HUMAN (swissprot)	Y222	PVYTSGIyNIPGDSQ	0.450891
		Abl Kinase	Tyrosine kinase group	0.4813	0.00773066	TENS1_HUMAN (swissprot)	Y222	PVYTSGIyNIPGDSQ	0.450891
		CDK1 motif 1 - [ST]Px[KR]x	Proline-dependent serine/threonine kinase group	0.3424	0.004059	TENS1_HUMAN (swissprot)	S257	CYHKKFRsPARDVIF	1.5936
		PDK1 Binding	Kinase binding site group	0.5882	0.00771743	TENS1_HUMAN (swissprot)	E301	FPEYGKVeFVFSYGP	0.327844
		PDK1 Binding	Kinase binding site group	0.5839	0.00724859	TENS1_HUMAN (swissprot)	S305	GKVEFVFsYGPEKIQ	0.473254
		PDK1 Binding	Kinase binding site group	0.5942	0.00839359	TENS1_HUMAN (swissprot)	S343	WDSYDNFsGHRDDGM	1.1713
		PKC delta	Basophilic serine/threonine kinase	0.4005	0.0054224	TENS1_HUMAN (swissprot)	S374	AKVKKKDsLHGSTGA	1.13901
		PKC epsilon	Basophilic serine/threonine kinase	0.4149	0.00525786	TENS1_HUMAN (swissprot)	S374	AKVKKKDsLHGSTGA	1.13901
		Aurora A	Basophilic serine/threonine kinase	0.5465	0.00922767	TENS1_HUMAN (swissprot)	S374	AKVKKKDsLHGSTGA	1.13901
		Aurora B	Basophilic serine/threonine kinase	0.5543	0.00844418	TENS1_HUMAN (swissprot)	S374	AKVKKKDsLHGSTGA	1.13901
		Cdk5 Kinase	Proline-dependent serine/threonine kinase group	0.478	0.00908162	TENS1_HUMAN (swissprot)	S433	SSATAALsPQEKREL	1.18659
		Casein Kinase 1	Acidophilic serine/threonine kinase group	0.4125	0.00892844	TENS1_HUMAN (swissprot)	S515	QDGHSAGsMGTLSSL	0.433954
		Erk1 Kinase	Proline-dependent serine/threonine kinase group	0.5253	0.00959733	TENS1_HUMAN (swissprot)	S538	GGYPEALsPLTNGLD	0.47087
		Akt Kinase	Basophilic serine/threonine kinase	0.5206	0.00443704	TENS1_HUMAN (swissprot)	S621	SGMFRSQsFSEAEPQ	1.43239
		Calmodulin dependent Kinase 2	Basophilic serine/threonine kinase	0.3872	0.000856351	TENS1_HUMAN (swissprot)	S621	SGMFRSQsFSEAEPQ	1.43239
		PKC epsilon	Basophilic serine/threonine kinase	0.4311	0.0077033	TENS1_HUMAN (swissprot)	S621	SGMFRSQsFSEAEPQ	1.43239
		PDK1 Binding	Kinase binding site group	0.5698	0.00572021	TENS1_HUMAN (swissprot)	S621	SGMFRSQsFSEAEPQ	1.43239
		14-3-3 Mode 1	Phosphoserine/threonine binding group	0.3705	0.00358269	TENS1_HUMAN (swissprot)	S621	SGMFRSQsFSEAEPQ	1.43239
		Cortactin SH3	Src homology 3 group	0.5398	0.00447648	TENS1_HUMAN (swissprot)	P630	SEAEPQLpPAPVRGG	1.22245
		Crk SH3	Src homology 3 group	0.3962	0.00206169	TENS1_HUMAN (swissprot)	P630	SEAEPQLpPAPVRGG	1.22245
		Itk SH3	Src homology 3 group	0.6069	0.00948815	TENS1_HUMAN (swissprot)	P630	SEAEPQLpPAPVRGG	1.22245
		Nck 2nd SH3	Src homology 3 group	0.4617	0.00284908	TENS1_HUMAN (swissprot)	P631	EAEPQLPpAPVRGGS	0.523908
		Cbl-Associated protein C-SH3	Src homology 3 group	0.5752	0.00152043	TENS1_HUMAN (swissprot)	P633	EPQLPPApVRGGSSR	0.79634
		Intersectin SH3A	Src homology 3 group	0.4264	0.00043802	TENS1_HUMAN (swissprot)	P633	EPQLPPApVRGGSSR	0.79634
		p85 SH3 mode2	Src homology 3 group	0.5034	0.00186218	TENS1_HUMAN (swissprot)	P633	EPQLPPApVRGGSSR	0.79634
		Amphiphysin SH3	Src homology 3 group	0.5398	0.00568366	TENS1_HUMAN (swissprot)	P660	QQQQQQQpRPPPRQQ	4.97713
		Amphiphysin SH3	Src homology 3 group	0.5334	0.00497984	TENS1_HUMAN (swissprot)	P663	QQQQPRPpPRQQERA	5.62889
		Cbl-Associated protein C-SH3	Src homology 3 group	0.6534	0.00416713	TENS1_HUMAN (swissprot)	P663	QQQQPRPpPRQQERA	5.62889
		Intersectin SH3A	Src homology 3 group	0.586	0.00307722	TENS1_HUMAN (swissprot)	P663	QQQQPRPpPRQQERA	5.62889
		GSK3 Kinase	Acidophilic serine/threonine kinase group	0.4798	0.00432253	TENS1_HUMAN (swissprot)	T688	SPQPLAEtPIPSLPE	0.969812
		GSK3-improved	Acidophilic serine/threonine kinase group	0.3633	0.00128141	TENS1_HUMAN (swissprot)	T688	SPQPLAEtPIPSLPE	0.969812
		Erk1 Kinase	Proline-dependent serine/threonine kinase group	0.4941	0.00569642	TENS1_HUMAN (swissprot)	T688	SPQPLAEtPIPSLPE	0.969812
		DNA PK	DNA damage kinase group	0.5097	0.00843546	TENS1_HUMAN (swissprot)	S701	PEFPRAAsQQEIEQS	1.62801
		ATM Kinase	DNA damage kinase group	0.4613	0.00362048	TENS1_HUMAN (swissprot)	S708	SQQEIEQsIETLNML	1.61377
		14-3-3 Mode 1	Phosphoserine/threonine binding group	0.3617	0.00321782	TENS1_HUMAN (swissprot)	S733	APLHKSQsVPGAWPG	0.809513
		CDK1 motif 2 - [ST]PxxK	Proline-dependent serine/threonine kinase group	0.4317	0.00848349	TENS1_HUMAN (swissprot)	S742	PGAWPGAsPLSSQPL	0.524684
		GSK3 Kinase	Acidophilic serine/threonine kinase group	0.4005	0.000891102	TENS1_HUMAN (swissprot)	S746	PGASPLSsQPLSGSS	0.749549
		GSK3-improved	Acidophilic serine/threonine kinase group	0.3663	0.00141098	TENS1_HUMAN (swissprot)	S746	PGASPLSsQPLSGSS	0.749549
		PDK1 Binding	Kinase binding site group	0.1841	0.00026635	TENS1_HUMAN (swissprot)	D797	GRSYSPYdYQPCLAG	3.89069
		CDK1 motif 2 - [ST]PxxK	Proline-dependent serine/threonine kinase group	0.4414	0.0096498	TENS1_HUMAN (swissprot)	S813	NQDFHSKsPASSSLP	1.72299
		Nck 2nd SH3	Src homology 3 group	0.4797	0.00419109	TENS1_HUMAN (swissprot)	P886	VQAREKQpAEPPAPL	3.32018
		Amphiphysin SH3	Src homology 3 group	0.4652	0.00121572	TENS1_HUMAN (swissprot)	P889	REKQPAEpPAPLRRR	1.4975
		Cbl-Associated protein C-SH3	Src homology 3 group	0.6991	0.00760734	TENS1_HUMAN (swissprot)	P892	QPAEPPApLRRRAAS	1.75121
		Intersectin SH3A	Src homology 3 group	0.4032	0.000342663	TENS1_HUMAN (swissprot)	P892	QPAEPPApLRRRAAS	1.75121
		p85 SH3 mode2	Src homology 3 group	0.5842	0.00679485	TENS1_HUMAN (swissprot)	P892	QPAEPPApLRRRAAS	1.75121
		Akt Kinase	Basophilic serine/threonine kinase	0.4795	0.00239836	TENS1_HUMAN (swissprot)	S899	PLRRRAAsDGQYENQ	0.897065
		Grb2 SH2	Src homology 2 group	0.3365	0.000424778	TENS1_HUMAN (swissprot)	Y903	RAASDGQyENQSPEA	3.08241
		GSK3 Kinase	Acidophilic serine/threonine kinase group	0.4911	0.0051192	TENS1_HUMAN (swissprot)	T911	ENQSPEAtSPRSPGV	2.34847
		GSK3-improved	Acidophilic serine/threonine kinase group	0.4241	0.00440374	TENS1_HUMAN (swissprot)	T911	ENQSPEAtSPRSPGV	2.34847
		Cdc2 Kinase	Proline-dependent serine/threonine kinase group	0.4665	0.00427662	TENS1_HUMAN (swissprot)	S915	PEATSPRsPGVRSPV	1.05637
		Cdk5 Kinase	Proline-dependent serine/threonine kinase group	0.4481	0.00612469	TENS1_HUMAN (swissprot)	S915	PEATSPRsPGVRSPV	1.05637
		GSK3 Kinase	Acidophilic serine/threonine kinase group	0.4843	0.00463979	TENS1_HUMAN (swissprot)	S963	MEGTSPSsPPPSGVR	2.3528
		GSK3-improved	Acidophilic serine/threonine kinase group	0.4094	0.00352098	TENS1_HUMAN (swissprot)	S963	MEGTSPSsPPPSGVR	2.3528
		Erk1 Kinase	Proline-dependent serine/threonine kinase group	0.4414	0.00205058	TENS1_HUMAN (swissprot)	S963	MEGTSPSsPPPSGVR	2.3528
		GSK3 Kinase	Acidophilic serine/threonine kinase group	0.3979	0.00085244	TENS1_HUMAN (swissprot)	S967	SPSSPPPsGVRSPPG	1.05637
		GSK3-improved	Acidophilic serine/threonine kinase group	0.2917	0.000245565	TENS1_HUMAN (swissprot)	S967	SPSSPPPsGVRSPPG	1.05637
		Erk1 Kinase	Proline-dependent serine/threonine kinase group	0.4553	0.00275432	TENS1_HUMAN (swissprot)	S971	PPPSGVRsPPGLAKT	1.05637
		Src SH3	Src homology 3 group	0.4867	0.00875055	TENS1_HUMAN (swissprot)	P973	PSGVRSPpGLAKTPL	0.605405
		14-3-3 Mode 1	Phosphoserine/threonine binding group	0.3083	0.00147514	TENS1_HUMAN (swissprot)	S1048	DSEPKSFsAPATQAY	0.562396
		GSK3 Kinase	Acidophilic serine/threonine kinase group	0.5029	0.00666851	TENS1_HUMAN (swissprot)	T1078	VSPSPLStSSPILSA	1.01501
		GSK3 Kinase	Acidophilic serine/threonine kinase group	0.5211	0.00931186	TENS1_HUMAN (swissprot)	S1080	PSPLSTSsPILSADS	0.53093
		GSK3-improved	Acidophilic serine/threonine kinase group	0.4465	0.00658419	TENS1_HUMAN (swissprot)	S1080	PSPLSTSsPILSADS	0.53093
		Casein Kinase 1	Acidophilic serine/threonine kinase group	0.374	0.00314585	TENS1_HUMAN (swissprot)	S1092	ADSTSVGsFPSGESS	0.404756
		Erk1 Kinase	Proline-dependent serine/threonine kinase group	0.4552	0.00274926	TENS1_HUMAN (swissprot)	T1105	SSDQGPRtPTQPLLE	3.8711
		14-3-3 Mode 1	Phosphoserine/threonine binding group	0.3917	0.00463784	TENS1_HUMAN (swissprot)	T1107	DQGPRTPtQPLLESG	1.62994
		Akt Kinase	Basophilic serine/threonine kinase	0.5258	0.00479655	TENS1_HUMAN (swissprot)	S1119	ESGFRSGsLGQPSPS	0.575653
		14-3-3 Mode 1	Phosphoserine/threonine binding group	0.317	0.00172319	TENS1_HUMAN (swissprot)	S1119	ESGFRSGsLGQPSPS	0.575653
		GSK3 Kinase	Acidophilic serine/threonine kinase group	0.4485	0.0022569	TENS1_HUMAN (swissprot)	T1139	QSSSPLPtVGSSYSS	0.415135
		GSK3-improved	Acidophilic serine/threonine kinase group	0.4124	0.00369689	TENS1_HUMAN (swissprot)	T1139	QSSSPLPtVGSSYSS	0.415135
		PDK1 Binding	Kinase binding site group	0.5907	0.00799916	TENS1_HUMAN (swissprot)	D1148	GSSYSSPdYSLQHFS	1.37328
		Cdc2 Kinase	Proline-dependent serine/threonine kinase group	0.3893	0.0010881	TENS1_HUMAN (swissprot)	S1177	GVHTVPGsPQARHRT	1.27135
		Cdk5 Kinase	Proline-dependent serine/threonine kinase group	0.3472	0.00122082	TENS1_HUMAN (swissprot)	S1177	GVHTVPGsPQARHRT	1.27135
		Akt Kinase	Basophilic serine/threonine kinase	0.5568	0.0074751	TENS1_HUMAN (swissprot)	T1184	SPQARHRtVGTNTPP	0.934372
		14-3-3 Mode 1	Phosphoserine/threonine binding group	0.3452	0.00261112	TENS1_HUMAN (swissprot)	T1184	SPQARHRtVGTNTPP	0.934372
		Erk1 Kinase	Proline-dependent serine/threonine kinase group	0.4743	0.00394046	TENS1_HUMAN (swissprot)	T1189	HRTVGTNtPPSPGFG	2.55405
		CDK1 motif 1 - [ST]Px[KR]x	Proline-dependent serine/threonine kinase group	0.4406	0.00923807	TENS1_HUMAN (swissprot)	S1232	FHGSTVSsPQSSAAT	1.09622
		CDK1 motif 2 - [ST]PxxK	Proline-dependent serine/threonine kinase group	0.4089	0.00615927	TENS1_HUMAN (swissprot)	S1232	FHGSTVSsPQSSAAT	1.09622
		GSK3 Kinase	Acidophilic serine/threonine kinase group	0.5239	0.00971853	TENS1_HUMAN (swissprot)	S1236	TVSSPQSsAATTPGS	1.04981
		GSK3-improved	Acidophilic serine/threonine kinase group	0.4326	0.00523115	TENS1_HUMAN (swissprot)	S1236	TVSSPQSsAATTPGS	1.04981
		GSK3 Kinase	Acidophilic serine/threonine kinase group	0.4481	0.00224398	TENS1_HUMAN (swissprot)	T1239	SPQSSAAtTPGSPSL	0.745424
		GSK3-improved	Acidophilic serine/threonine kinase group	0.3695	0.00154918	TENS1_HUMAN (swissprot)	T1239	SPQSSAAtTPGSPSL	0.745424
		CDK1 motif 1 - [ST]Px[KR]x	Proline-dependent serine/threonine kinase group	0.4099	0.00702957	TENS1_HUMAN (swissprot)	T1240	PQSSAATtPGSPSLC	0.988828
		CDK1 motif 2 - [ST]PxxK	Proline-dependent serine/threonine kinase group	0.3764	0.00379052	TENS1_HUMAN (swissprot)	T1240	PQSSAATtPGSPSLC	0.988828
		Cdc2 Kinase	Proline-dependent serine/threonine kinase group	0.5216	0.00976164	TENS1_HUMAN (swissprot)	S1243	SAATTPGsPSLCRHP	0.803088
		Cdc2 Kinase	Proline-dependent serine/threonine kinase group	0.515	0.00898059	TENS1_HUMAN (swissprot)	S1269	KVATTPGsPSLGRHP	0.803088
		CDK1 motif 1 - [ST]Px[KR]x	Proline-dependent serine/threonine kinase group	0.4398	0.00917482	TENS1_HUMAN (swissprot)	S1294	LHSNAIAsPGSPSLG	0.445982
		CDK1 motif 2 - [ST]PxxK	Proline-dependent serine/threonine kinase group	0.408	0.0060836	TENS1_HUMAN (swissprot)	S1294	LHSNAIAsPGSPSLG	0.445982
		Cdc2 Kinase	Proline-dependent serine/threonine kinase group	0.4799	0.00533836	TENS1_HUMAN (swissprot)	T1328	VAYGGYStPEDRRPT	3.10573
		Cdk5 Kinase	Proline-dependent serine/threonine kinase group	0.477	0.00895476	TENS1_HUMAN (swissprot)	T1328	VAYGGYStPEDRRPT	3.10573
		Akt Kinase	Basophilic serine/threonine kinase	0.5456	0.00637582	TENS1_HUMAN (swissprot)	T1335	TPEDRRPtLSRQSSA	2.16817
		Protein Kinase A	Basophilic serine/threonine kinase	0.2957	0.00108765	TENS1_HUMAN (swissprot)	T1335	TPEDRRPtLSRQSSA	2.16817
		Aurora A	Basophilic serine/threonine kinase	0.3645	0.000744911	TENS1_HUMAN (swissprot)	T1335	TPEDRRPtLSRQSSA	2.16817
		Aurora B	Basophilic serine/threonine kinase	0.4864	0.00363728	TENS1_HUMAN (swissprot)	T1335	TPEDRRPtLSRQSSA	2.16817
		14-3-3 Mode 1	Phosphoserine/threonine binding group	0.4502	0.00919909	TENS1_HUMAN (swissprot)	T1335	TPEDRRPtLSRQSSA	2.16817
		Calmodulin dependent Kinase 2	Basophilic serine/threonine kinase	0.4743	0.00573338	TENS1_HUMAN (swissprot)	S1341	PTLSRQSsASGYQAP	0.954925
		14-3-3 Mode 1	Phosphoserine/threonine binding group	0.4431	0.00843462	TENS1_HUMAN (swissprot)	S1341	PTLSRQSsASGYQAP	0.954925
		Abl SH2	Src homology 2 group	0.4591	0.00933712	TENS1_HUMAN (swissprot)	Y1345	RQSSASGyQAPSTPS	1.2883
		Abl Kinase	Tyrosine kinase group	0.423	0.00279987	TENS1_HUMAN (swissprot)	Y1345	RQSSASGyQAPSTPS	1.2883
		Erk1 Kinase	Proline-dependent serine/threonine kinase group	0.4934	0.00561354	TENS1_HUMAN (swissprot)	T1350	SGYQAPStPSFPVSP	1.22973
		Erk1 Kinase	Proline-dependent serine/threonine kinase group	0.4295	0.0016577	TENS1_HUMAN (swissprot)	S1356	STPSFPVsPAYYPGL	0.862702
		GSK3 Kinase	Acidophilic serine/threonine kinase group	0.4176	0.00125893	TENS1_HUMAN (swissprot)	S1365	AYYPGLSsPATSPSP	0.765164
		GSK3-improved	Acidophilic serine/threonine kinase group	0.3269	0.000559145	TENS1_HUMAN (swissprot)	S1365	AYYPGLSsPATSPSP	0.765164
		Erk1 Kinase	Proline-dependent serine/threonine kinase group	0.4941	0.00569642	TENS1_HUMAN (swissprot)	S1365	AYYPGLSsPATSPSP	0.765164
		GSK3 Kinase	Acidophilic serine/threonine kinase group	0.4675	0.00345535	TENS1_HUMAN (swissprot)	S1369	GLSSPATsPSPDSAA	1.43468
		Erk1 Kinase	Proline-dependent serine/threonine kinase group	0.5237	0.00938606	TENS1_HUMAN (swissprot)	S1369	GLSSPATsPSPDSAA	1.43468
		CDK1 motif 2 - [ST]PxxK	Proline-dependent serine/threonine kinase group	0.4292	0.00820257	TENS1_HUMAN (swissprot)	S1369	GLSSPATsPSPDSAA	1.43468
		Calmodulin dependent Kinase 2	Basophilic serine/threonine kinase	0.4758	0.00594118	TENS1_HUMAN (swissprot)	S1381	SAAFRQGsPTPALPE	1.81621
		CDK1 motif 2 - [ST]PxxK	Proline-dependent serine/threonine kinase group	0.4408	0.00957312	TENS1_HUMAN (swissprot)	S1381	SAAFRQGsPTPALPE	1.81621
		Grb2 SH3	Src homology 3 group	0.4757	0.00818085	TENS1_HUMAN (swissprot)	P1384	FRQGSPTpALPEKRR	1.01871
		Src SH3	Src homology 3 group	0.4886	0.00897592	TENS1_HUMAN (swissprot)	P1384	FRQGSPTpALPEKRR	1.01871
		Akt Kinase	Basophilic serine/threonine kinase	0.5366	0.00561124	TENS1_HUMAN (swissprot)	S1393	LPEKRRMsVGDRAGS	0.730163
		Calmodulin dependent Kinase 2	Basophilic serine/threonine kinase	0.4931	0.00833775	TENS1_HUMAN (swissprot)	S1393	LPEKRRMsVGDRAGS	0.730163
		Protein Kinase A	Basophilic serine/threonine kinase	0.2877	0.000940567	TENS1_HUMAN (swissprot)	S1393	LPEKRRMsVGDRAGS	0.730163
		Aurora A	Basophilic serine/threonine kinase	0.2987	0.000219048	TENS1_HUMAN (swissprot)	S1393	LPEKRRMsVGDRAGS	0.730163
		Aurora B	Basophilic serine/threonine kinase	0.3024	0.000140177	TENS1_HUMAN (swissprot)	S1393	LPEKRRMsVGDRAGS	0.730163
		Akt Kinase	Basophilic serine/threonine kinase	0.4904	0.00284821	TENS1_HUMAN (swissprot)	S1400	SVGDRAGsLPNYATI	0.653837
		14-3-3 Mode 1	Phosphoserine/threonine binding group	0.259	0.000544874	TENS1_HUMAN (swissprot)	S1400	SVGDRAGsLPNYATI	0.653837
		GSK3 Kinase	Acidophilic serine/threonine kinase group	0.4853	0.00471029	TENS1_HUMAN (swissprot)	S1417	KVSSPVAsGMSSPSG	0.302218
		GSK3-improved	Acidophilic serine/threonine kinase group	0.3646	0.00133756	TENS1_HUMAN (swissprot)	S1417	KVSSPVAsGMSSPSG	0.302218
		GSK3-improved	Acidophilic serine/threonine kinase group	0.4599	0.00819109	TENS1_HUMAN (swissprot)	T1427	SSPSGGStVSFSHTL	0.377773
		14-3-3 Mode 1	Phosphoserine/threonine binding group	0.4468	0.00881977	TENS1_HUMAN (swissprot)	T1433	STVSFSHtLPDFSKY	1.28432
		PDK1 Binding	Kinase binding site group	0.5085	0.00142773	TENS1_HUMAN (swissprot)	S1441	LPDFSKYsMPDNSPE	2.45923
		PKC mu	Basophilic serine/threonine kinase	0.4218	0.00562849	TENS1_HUMAN (swissprot)	S1558	SALVYQHsIIPLALP	0.549881
		PIP3-binding PH	Lipid binding group	0.7145	0.00870562	TENS1_HUMAN (swissprot)	F1656	TDNQRKLfFRRHYPL	1.08715
Syndesmos	Q9BRJ7	Cbl-Associated protein C-SH3	Src homology 3 group	0.6958	0.00723644	SDOS_HUMAN (swissprot)	P45	GQLFGRIpMRFSVLM	0.816565
		Calmodulin dependent Kinase 2	Basophilic serine/threonine kinase	0.4359	0.00262899	SDOS_HUMAN (swissprot)	T118	HLYARQLtLEQLHAV	1.16834
Receptor-like tyrosine phosphatase alpha	P18433	GSK3 Kinase	Acidophilic serine/threonine kinase group	0.4937	0.00533232	PTPRA_HUMAN (swissprot)	S54	AKTSNPTsSLTSLSV	1.09309
		GSK3-improved	Acidophilic serine/threonine kinase group	0.4416	0.00610722	PTPRA_HUMAN (swissprot)	S54	AKTSNPTsSLTSLSV	1.09309
		PKC mu	Basophilic serine/threonine kinase	0.4446	0.00917394	PTPRA_HUMAN (swissprot)	S60	TSSLTSLsVAPTFSP	0.393513
		Casein Kinase 1	Acidophilic serine/threonine kinase group	0.3098	0.000490723	PTPRA_HUMAN (swissprot)	T130	GNSSTAAtTPETFPP	1.30449
		Erk1 Kinase	Proline-dependent serine/threonine kinase group	0.4451	0.00223791	PTPRA_HUMAN (swissprot)	T131	NSSTAATtPETFPPS	1.86356
		Aurora A	Basophilic serine/threonine kinase	0.4826	0.00417379	PTPRA_HUMAN (swissprot)	S193	HSNSFRLsNGRTEDV	1.60568
		Aurora B	Basophilic serine/threonine kinase	0.4716	0.00290677	PTPRA_HUMAN (swissprot)	S193	HSNSFRLsNGRTEDV	1.60568
		CDK1 motif 2 - [ST]PxxK	Proline-dependent serine/threonine kinase group	0.439	0.00934308	PTPRA_HUMAN (swissprot)	S211	SVPLLARsPSTNRKY	1.81727
		AMP_Kinase	Basophilic serine/threonine kinase	0.6132	0.00831198	PTPRA_HUMAN (swissprot)	S213	PLLARSPsTNRKYPP	3.00405
		Src SH3	Src homology 3 group	0.4867	0.00875055	PTPRA_HUMAN (swissprot)	P219	PSTNRKYpPLPVDKL	2.18948
		p85 SH3 mode2	Src homology 3 group	0.4711	0.000979395	PTPRA_HUMAN (swissprot)	P222	NRKYPPLpVDKLEEE	1.12009
		PLCg C-terminal SH2	Src homology 2 group	0.3468	0.00134381	PTPRA_HUMAN (swissprot)	Y271	ENKEKNRyVNILPYD	1.02047
		PLCg N-terminal SH2	Src homology 2 group	0.3182	0.00327327	PTPRA_HUMAN (swissprot)	Y271	ENKEKNRyVNILPYD	1.02047
		PDGFR Kin	Tyrosine kinase group	0.3697	0.00503412	PTPRA_HUMAN (swissprot)	Y271	ENKEKNRyVNILPYD	1.02047
		AMP_Kinase	Basophilic serine/threonine kinase	0.5809	0.00468607	PTPRA_HUMAN (swissprot)	S280	NILPYDHsRVHLTPV	1.38046
		Grb2 SH2	Src homology 2 group	0.4182	0.00202628	PTPRA_HUMAN (swissprot)	Y295	EGVPDSDyINASFIN	0.950352
		PDK1 Binding	Kinase binding site group	0.5605	0.00471212	PTPRA_HUMAN (swissprot)	S299	DSDYINAsFINGYQE	0.525195
		Abl SH3	Src homology 3 group	0.46	0.00864541	PTPRA_HUMAN (swissprot)	P414	SWPDFGVpFTPIGML	0.502952
		Erk1 Kinase	Proline-dependent serine/threonine kinase group	0.5186	0.00871261	PTPRA_HUMAN (swissprot)	T416	PDFGVPFtPIGMLKF	0.47501
		Lck Kinase	Tyrosine kinase group	0.4662	0.00621777	PTPRA_HUMAN (swissprot)	Y471	TERKVDVyGFVSRIR	0.283078
		Erk D-domain	Kinase binding site group	0.5647	0.00536971	PTPRA_HUMAN (swissprot)	I567	KKNRVLQiIPYEFNR	0.389659
		Grb2 SH2	Src homology 2 group	0.4075	0.0016273	PTPRA_HUMAN (swissprot)	Y588	RGEENTDyVNASFID	1.08366
		PDK1 Binding	Kinase binding site group	0.5921	0.00815693	PTPRA_HUMAN (swissprot)	S592	NTDYVNAsFIDGYRQ	0.525195
		SHIP SH2	Src homology 2 group	0.4177	0.00958534	PTPRA_HUMAN (swissprot)	Y655	PSDGLVSyGDITVEL	0.413759
		Akt Kinase	Basophilic serine/threonine kinase	0.5659	0.00846626	PTPRA_HUMAN (swissprot)	T741	AGAGRTGtFCALSTV	0.221497
Focal Adhesion Kinase	Q05397	PDK1 Binding	Kinase binding site group	0.5305	0.00237819	FAK1_HUMAN (swissprot)	E44	LKVFHYFeSNSEPTT	1.61498
		Casein Kinase 1	Acidophilic serine/threonine kinase group	0.4126	0.00894907	FAK1_HUMAN (swissprot)	S54	SEPTTWAsIIRHGDA	0.31396
		Aurora B	Basophilic serine/threonine kinase	0.5131	0.00526852	FAK1_HUMAN (swissprot)	S88	ACYGFRLsHLRSEEV	1.09028
		PKC alpha/beta/gamma	Basophilic serine/threonine kinase	0.4033	0.00342349	FAK1_HUMAN (swissprot)	T219	LDSVKAKtLRKLIQQ	2.15841
		PKC mu	Basophilic serine/threonine kinase	0.411	0.00449356	FAK1_HUMAN (swissprot)	S239	ANLNREEsILKFFEI	1.06487
		PKC zeta	Basophilic serine/threonine kinase	0.4677	0.00651703	FAK1_HUMAN (swissprot)	S239	ANLNREEsILKFFEI	1.06487
		p85 SH3 mode1	Src homology 3 group	0.4079	0.000274687	FAK1_HUMAN (swissprot)	P371	KEGERALpSIPKLAN	0.428828
		Src SH3	Src homology 3 group	0.327	0.000403986	FAK1_HUMAN (swissprot)	P371	KEGERALpSIPKLAN	0.428828
		Akt Kinase	Basophilic serine/threonine kinase	0.5561	0.00740639	FAK1_HUMAN (swissprot)	S390	GMRTHAVsVSETDDY	0.396661
		Fgr SH2	Src homology 2 group	0.4287	0.00519877	FAK1_HUMAN (swissprot)	Y397	SVSETDDyAEIIDEE	1.22815
		Lck SH2	Src homology 2 group	0.3892	0.00640692	FAK1_HUMAN (swissprot)	Y397	SVSETDDyAEIIDEE	1.22815
		PLCg N-terminal SH2	Src homology 2 group	0.3388	0.00480516	FAK1_HUMAN (swissprot)	Y397	SVSETDDyAEIIDEE	1.22815
		Fgr Kinase	Tyrosine kinase group	0.3592	0.00167657	FAK1_HUMAN (swissprot)	Y397	SVSETDDyAEIIDEE	1.22815
		Insulin Receptor Kinase	Tyrosine kinase group	0.6233	0.00979639	FAK1_HUMAN (swissprot)	Y397	SVSETDDyAEIIDEE	1.22815
		PDGFR Kin	Tyrosine kinase group	0.3074	0.00116226	FAK1_HUMAN (swissprot)	Y397	SVSETDDyAEIIDEE	1.22815
		PLK1 Kinase	Acidophilic serine/threonine kinase group	0.3156	0.00608719	FAK1_HUMAN (swissprot)	T406	EIIDEEDtYTMPSTR	2.14056
		Abl SH2	Src homology 2 group	0.3936	0.00287651	FAK1_HUMAN (swissprot)	Y407	IIDEEDTyTMPSTRD	1.91122
		Itk SH2	Src homology 2 group	0.4094	0.00198313	FAK1_HUMAN (swissprot)	Y407	IIDEEDTyTMPSTRD	1.91122
		Lck SH2	Src homology 2 group	0.4028	0.00847771	FAK1_HUMAN (swissprot)	Y407	IIDEEDTyTMPSTRD	1.91122
		Abl Kinase	Tyrosine kinase group	0.4222	0.00275877	FAK1_HUMAN (swissprot)	Y407	IIDEEDTyTMPSTRD	1.91122
		Casein Kinase 1	Acidophilic serine/threonine kinase group	0.3419	0.00131054	FAK1_HUMAN (swissprot)	T408	IDEEDTYtMPSTRDY	1.53369
		Abl Kinase	Tyrosine kinase group	0.4335	0.00333923	FAK1_HUMAN (swissprot)	Y441	GDVHQGIyMSPENPA	0.510813
		Protein Kinase A	Basophilic serine/threonine kinase	0.4413	0.00752219	FAK1_HUMAN (swissprot)	S517	FLQVRKYsLDLASLI	1.09299
		Aurora A	Basophilic serine/threonine kinase	0.4803	0.00405168	FAK1_HUMAN (swissprot)	S517	FLQVRKYsLDLASLI	1.09299
		PLK1 Kinase	Acidophilic serine/threonine kinase group	0.3379	0.0089829	FAK1_HUMAN (swissprot)	T575	SRYMEDStYYKASKG	3.63419
		Protein Kinase A	Basophilic serine/threonine kinase	0.3861	0.00422636	FAK1_HUMAN (swissprot)	T600	SINFRRFtSASDVWM	1.01767
		Aurora A	Basophilic serine/threonine kinase	0.4674	0.00345445	FAK1_HUMAN (swissprot)	T600	SINFRRFtSASDVWM	1.01767
		Aurora B	Basophilic serine/threonine kinase	0.4753	0.00307892	FAK1_HUMAN (swissprot)	T600	SINFRRFtSASDVWM	1.01767
		PDK1 Binding	Kinase binding site group	0.578	0.00660905	FAK1_HUMAN (swissprot)	T600	SINFRRFtSASDVWM	1.01767
		Nck 2nd SH3	Src homology 3 group	0.5245	0.00918888	FAK1_HUMAN (swissprot)	P642	IENGERLpMPPNCPP	1.35432
		PLCg SH3	Src homology 3 group	0.5538	0.00927689	FAK1_HUMAN (swissprot)	P645	GERLPMPpNCPPTLY	0.750578
		Cbl-Associated protein C-SH3	Src homology 3 group	0.7057	0.00834914	FAK1_HUMAN (swissprot)	P648	LPMPPNCpPTLYSLM	0.583783
		p85 SH2	Src homology 2 group	0.5024	0.00811764	FAK1_HUMAN (swissprot)	Y652	PNCPPTLySLMTKCW	0.467411
		Erk D-domain	Kinase binding site group	0.3747	0.000302637	FAK1_HUMAN (swissprot)	L672	RRPRFTElKAQLSTI	1.65271
		Calmodulin dependent Kinase 2	Basophilic serine/threonine kinase	0.4441	0.00306083	FAK1_HUMAN (swissprot)	S677	TELKAQLsTILEEEK	0.365934
		PKC epsilon	Basophilic serine/threonine kinase	0.4371	0.00878317	FAK1_HUMAN (swissprot)	T678	ELKAQLStILEEEKA	0.365934
		Clk2 Kinase	Basophilic serine/threonine kinase	0.6657	0.00697731	FAK1_HUMAN (swissprot)	S695	EERMRMEsRRQATVS	3.49682
		Calmodulin dependent Kinase 2	Basophilic serine/threonine kinase	0.3918	0.000941305	FAK1_HUMAN (swissprot)	T700	MESRRQAtVSWDSGG	0.605163
		Cortactin SH3	Src homology 3 group	0.5569	0.00653279	FAK1_HUMAN (swissprot)	P712	SGGSDEApPKPSRPG	2.96445
		Itk SH3	Src homology 3 group	0.5933	0.00714269	FAK1_HUMAN (swissprot)	P712	SGGSDEApPKPSRPG	2.96445
		Nck 2nd SH3	Src homology 3 group	0.5078	0.0071572	FAK1_HUMAN (swissprot)	P712	SGGSDEApPKPSRPG	2.96445
		Amphiphysin SH3	Src homology 3 group	0.4511	0.00092368	FAK1_HUMAN (swissprot)	P715	SDEAPPKpSRPGYPS	4.44739
		Cortactin SH3	Src homology 3 group	0.55	0.00569767	FAK1_HUMAN (swissprot)	P715	SDEAPPKpSRPGYPS	4.44739
		Intersectin SH3A	Src homology 3 group	0.5765	0.00274744	FAK1_HUMAN (swissprot)	P715	SDEAPPKpSRPGYPS	4.44739
		p85 SH3 mode2	Src homology 3 group	0.4798	0.00118679	FAK1_HUMAN (swissprot)	P715	SDEAPPKpSRPGYPS	4.44739
		Amphiphysin SH3	Src homology 3 group	0.4897	0.0019811	FAK1_HUMAN (swissprot)	P718	APPKPSRpGYPSPRS	2.23011
		Cbl-Associated protein C-SH3	Src homology 3 group	0.72	0.00995637	FAK1_HUMAN (swissprot)	P721	KPSRPGYpSPRSSEG	2.23011
		Aurora A	Basophilic serine/threonine kinase	0.5319	0.00766813	FAK1_HUMAN (swissprot)	S726	GYPSPRSsEGFYPSP	1.19628
		Aurora B	Basophilic serine/threonine kinase	0.569	0.00967199	FAK1_HUMAN (swissprot)	S726	GYPSPRSsEGFYPSP	1.19628
		Cdc2 Kinase	Proline-dependent serine/threonine kinase group	0.4633	0.00402307	FAK1_HUMAN (swissprot)	S732	SSEGFYPsPQHMVQT	2.71135
		Cdk5 Kinase	Proline-dependent serine/threonine kinase group	0.4202	0.00405291	FAK1_HUMAN (swissprot)	S732	SSEGFYPsPQHMVQT	2.71135
		Aurora A	Basophilic serine/threonine kinase	0.5447	0.00901399	FAK1_HUMAN (swissprot)	S840	LKPDVRLsRGSIDRE	1.28851
		Aurora B	Basophilic serine/threonine kinase	0.4924	0.00395988	FAK1_HUMAN (swissprot)	S840	LKPDVRLsRGSIDRE	1.28851
		PKC epsilon	Basophilic serine/threonine kinase	0.3979	0.00322977	FAK1_HUMAN (swissprot)	S843	DVRLSRGsIDREDGS	1.36483
		p85 SH3 mode1	Src homology 3 group	0.5605	0.00568554	FAK1_HUMAN (swissprot)	P869	QPVGKPDpAAPPKKP	1.44402
		Src SH3	Src homology 3 group	0.4968	0.00994857	FAK1_HUMAN (swissprot)	P869	QPVGKPDpAAPPKKP	1.44402
		Intersectin SH3A	Src homology 3 group	0.6248	0.00560164	FAK1_HUMAN (swissprot)	P872	GKPDPAApPKKPPRP	2.23651
		Amphiphysin SH3	Src homology 3 group	0.5707	0.00965409	FAK1_HUMAN (swissprot)	P873	KPDPAAPpKKPPRPG	3.42323
		Crk SH3	Src homology 3 group	0.415	0.00337507	FAK1_HUMAN (swissprot)	P873	KPDPAAPpKKPPRPG	3.42323
		Itk SH3	Src homology 3 group	0.5938	0.00719565	FAK1_HUMAN (swissprot)	P873	KPDPAAPpKKPPRPG	3.42323
		p85 SH3 mode1	Src homology 3 group	0.504	0.00224152	FAK1_HUMAN (swissprot)	P873	KPDPAAPpKKPPRPG	3.42323
		Amphiphysin SH3	Src homology 3 group	0.5643	0.00858401	FAK1_HUMAN (swissprot)	P876	PAAPPKKpPRPGAPG	6.63687
		Cbl-Associated protein C-SH3	Src homology 3 group	0.6391	0.00347886	FAK1_HUMAN (swissprot)	P876	PAAPPKKpPRPGAPG	6.63687
		Cortactin SH3	Src homology 3 group	0.5735	0.00854193	FAK1_HUMAN (swissprot)	P876	PAAPPKKpPRPGAPG	6.63687
		Intersectin SH3A	Src homology 3 group	0.4448	0.000548888	FAK1_HUMAN (swissprot)	P876	PAAPPKKpPRPGAPG	6.63687
		p85 SH3 mode2	Src homology 3 group	0.5046	0.00190491	FAK1_HUMAN (swissprot)	P876	PAAPPKKpPRPGAPG	6.63687
		Cortactin SH3	Src homology 3 group	0.4744	0.00125791	FAK1_HUMAN (swissprot)	P879	PPKKPPRpGAPGHLG	1.65904
		Cbl-Associated protein C-SH3	Src homology 3 group	0.6998	0.00768601	FAK1_HUMAN (swissprot)	P882	KPPRPGApGHLGSLA	0.39342
		GSK3-improved	Acidophilic serine/threonine kinase group	0.4599	0.00819109	FAK1_HUMAN (swissprot)	S893	GSLASLSsPADSYNE	0.885405
		Erk1 Kinase	Proline-dependent serine/threonine kinase group	0.5145	0.00817121	FAK1_HUMAN (swissprot)	S910	KLQPQEIsPPPTANL	1.37838
		GSK3 Kinase	Acidophilic serine/threonine kinase group	0.4897	0.0050205	FAK1_HUMAN (swissprot)	T914	QEISPPPtANLDRSN	1.10021
		Fgr SH2	Src homology 2 group	0.3782	0.00157691	FAK1_HUMAN (swissprot)	Y925	DRSNDKVyENVTGLV	1.14411
		Lck SH2	Src homology 2 group	0.4024	0.00841294	FAK1_HUMAN (swissprot)	Y925	DRSNDKVyENVTGLV	1.14411
		Src SH2	Src homology 2 group	0.413	0.00967277	FAK1_HUMAN (swissprot)	Y925	DRSNDKVyENVTGLV	1.14411
		p85 SH2	Src homology 2 group	0.1916	0.000121227	FAK1_HUMAN (swissprot)	Y950	QPAPPEEyVPMVKEV	1.22318
		EGFR Kinase	Tyrosine kinase group	0.3417	0.00117789	FAK1_HUMAN (swissprot)	Y950	QPAPPEEyVPMVKEV	1.22318
		Fgr Kinase	Tyrosine kinase group	0.3883	0.00358915	FAK1_HUMAN (swissprot)	Y950	QPAPPEEyVPMVKEV	1.22318
		Insulin Receptor Kinase	Tyrosine kinase group	0.5377	0.00202271	FAK1_HUMAN (swissprot)	Y950	QPAPPEEyVPMVKEV	1.22318
		PDGFR Kin	Tyrosine kinase group	0.2586	0.000278743	FAK1_HUMAN (swissprot)	Y950	QPAPPEEyVPMVKEV	1.22318
Paxillin	P49023	Crk SH2	Src homology 2 group	0.4506	0.00951094	PAXI_HUMAN (swissprot)	Y31	FLSEETPySYPTGNH	2.6018
		Itk SH2	Src homology 2 group	0.4534	0.00523356	PAXI_HUMAN (swissprot)	Y31	FLSEETPySYPTGNH	2.6018
		PDK1 Binding	Kinase binding site group	0.5824	0.007086	PAXI_HUMAN (swissprot)	S32	LSEETPYsYPTGNHT	2.6018
		Erk1 Binding	Kinase binding site group	0.4059	0.00364726	PAXI_HUMAN (swissprot)	P34	EETPYSYpTGNHTYQ	1.7747
		Fgr SH2	Src homology 2 group	0.3497	0.000824025	PAXI_HUMAN (swissprot)	Y40	YPTGNHTyQEIAVPP	1.48254
		Fyn SH2	Src homology 2 group	0.3305	0.000697055	PAXI_HUMAN (swissprot)	Y40	YPTGNHTyQEIAVPP	1.48254
		Lck SH2	Src homology 2 group	0.282	0.000543167	PAXI_HUMAN (swissprot)	Y40	YPTGNHTyQEIAVPP	1.48254
		Src SH2	Src homology 2 group	0.2604	0.00041393	PAXI_HUMAN (swissprot)	Y40	YPTGNHTyQEIAVPP	1.48254
		Abl SH3	Src homology 3 group	0.4565	0.00818412	PAXI_HUMAN (swissprot)	P47	YQEIAVPpPVPPPPS	0.72171
		Crk SH3	Src homology 3 group	0.4519	0.00651228	PAXI_HUMAN (swissprot)	P47	YQEIAVPpPVPPPPS	0.72171
		Nck 2nd SH3	Src homology 3 group	0.49	0.00522548	PAXI_HUMAN (swissprot)	P48	QEIAVPPpVPPPPSS	1.50356
		Cbl-Associated protein C-SH3	Src homology 3 group	0.7025	0.00798948	PAXI_HUMAN (swissprot)	P50	IAVPPPVpPPPSSEA	1.50356
		Cortactin SH3	Src homology 3 group	0.4701	0.00114509	PAXI_HUMAN (swissprot)	P50	IAVPPPVpPPPSSEA	1.50356
		Intersectin SH3A	Src homology 3 group	0.4783	0.000787444	PAXI_HUMAN (swissprot)	P50	IAVPPPVpPPPSSEA	1.50356
		Src SH3	Src homology 3 group	0.4902	0.0091657	PAXI_HUMAN (swissprot)	P50	IAVPPPVpPPPSSEA	1.50356
		Cbl-Associated protein C-SH3	Src homology 3 group	0.6966	0.00732635	PAXI_HUMAN (swissprot)	P51	AVPPPVPpPPSSEAL	1.30309
		PLCg SH3	Src homology 3 group	0.4234	0.00060744	PAXI_HUMAN (swissprot)	P51	AVPPPVPpPPSSEAL	1.30309
		Cdc2 Kinase	Proline-dependent serine/threonine kinase group	0.5182	0.00935928	PAXI_HUMAN (swissprot)	S106	NPQDSVGsPCSRVGE	0.250563
		Cdk5 Kinase	Proline-dependent serine/threonine kinase group	0.4827	0.00967784	PAXI_HUMAN (swissprot)	S106	NPQDSVGsPCSRVGE	0.250563
		CDK1 motif 1 - [ST]Px[KR]x	Proline-dependent serine/threonine kinase group	0.4167	0.00742585	PAXI_HUMAN (swissprot)	S106	NPQDSVGsPCSRVGE	0.250563
		CDK1 motif 2 - [ST]PxxK	Proline-dependent serine/threonine kinase group	0.3836	0.00421501	PAXI_HUMAN (swissprot)	S106	NPQDSVGsPCSRVGE	0.250563
		Crk SH2	Src homology 2 group	0.3979	0.0035158	PAXI_HUMAN (swissprot)	Y118	VGEEEHVySFPNKQK	0.650724
		Itk SH2	Src homology 2 group	0.47	0.00761317	PAXI_HUMAN (swissprot)	Y118	VGEEEHVySFPNKQK	0.650724
		PDK1 Binding	Kinase binding site group	0.567	0.0054167	PAXI_HUMAN (swissprot)	S119	GEEEHVYsFPNKQKS	0.798615
		Erk1 Binding	Kinase binding site group	0.2968	0.00192516	PAXI_HUMAN (swissprot)	P121	EEHVYSFpNKQKSAE	2.37833
		AMP_Kinase	Basophilic serine/threonine kinase	0.6064	0.00742299	PAXI_HUMAN (swissprot)	S143	TSLGSNLsELDRLLL	1.00878
		Erk1 Kinase	Proline-dependent serine/threonine kinase group	0.431	0.00170527	PAXI_HUMAN (swissprot)	S178	PPLPGALsPLYGVPE	0.511231
		Abl Kinase	Tyrosine kinase group	0.3502	0.000598458	PAXI_HUMAN (swissprot)	Y181	PGALSPLyGVPETNS	0.520059
		DNA PK	DNA damage kinase group	0.4576	0.0035565	PAXI_HUMAN (swissprot)	S216	GLEDVRPsVESLLDE	1.60216
		Cdc2 Kinase	Proline-dependent serine/threonine kinase group	0.4613	0.0038646	PAXI_HUMAN (swissprot)	S244	VNQGEMSsPQRVTST	2.13621
		Cdk5 Kinase	Proline-dependent serine/threonine kinase group	0.4145	0.00366173	PAXI_HUMAN (swissprot)	S244	VNQGEMSsPQRVTST	2.13621
		CDK1 motif 1 - [ST]Px[KR]x	Proline-dependent serine/threonine kinase group	0.382	0.00562181	PAXI_HUMAN (swissprot)	S244	VNQGEMSsPQRVTST	2.13621
		Erk1 Kinase	Proline-dependent serine/threonine kinase group	0.3473	0.000273963	PAXI_HUMAN (swissprot)	S322	QGKTGSSsPPGGPPK	1.30502
		Crk SH3	Src homology 3 group	0.379	0.00154584	PAXI_HUMAN (swissprot)	P324	KTGSSSPpGGPPKPG	1.11197
		Cbl-Associated protein C-SH3	Src homology 3 group	0.6966	0.00732635	PAXI_HUMAN (swissprot)	P327	SSSPPGGpPKPGSQL	1.6594
		Cortactin SH3	Src homology 3 group	0.5264	0.00363751	PAXI_HUMAN (swissprot)	P327	SSSPPGGpPKPGSQL	1.6594
		Intersectin SH3A	Src homology 3 group	0.6461	0.0075102	PAXI_HUMAN (swissprot)	P327	SSSPPGGpPKPGSQL	1.6594
		p85 SH3 mode2	Src homology 3 group	0.5699	0.00548916	PAXI_HUMAN (swissprot)	P327	SSSPPGGpPKPGSQL	1.6594
		PLCg SH3	Src homology 3 group	0.4411	0.0010419	PAXI_HUMAN (swissprot)	P328	SSPPGGPpKPGSQLD	1.6594
		PDK1 Binding	Kinase binding site group	0.5965	0.00865278	PAXI_HUMAN (swissprot)	D408	GQPYCEKdYHNLFSP	4.71945
		PLK1 Kinase	Acidophilic serine/threonine kinase group	0.3374	0.00891131	PAXI_HUMAN (swissprot)	T435	VVTALDRtWHPEHFF	2.39329
		Protein Kinase A	Basophilic serine/threonine kinase	0.3406	0.00230805	PAXI_HUMAN (swissprot)	S533	HYHERRGsLCSGCQK	0.352645
		Aurora A	Basophilic serine/threonine kinase	0.4564	0.00299251	PAXI_HUMAN (swissprot)	S533	HYHERRGsLCSGCQK	0.352645
		PKC epsilon	Basophilic serine/threonine kinase	0.4082	0.00442444	PAXI_HUMAN (swissprot)	T572	LKQLNKGtFKEQNDK	1.96302
Integrin-Linked Protein Kinase	Q13418	Erk D-domain	Kinase binding site group	0.5631	0.00526338	ILK_HUMAN (swissprot)	V16	REGNAVAvRLWLDNT	0.216605
		Erk D-domain	Kinase binding site group	0.6101	0.00992394	ILK_HUMAN (swissprot)	L71	NRGDDTPlHLAASHG	0.478115
		PKC alpha/beta/gamma	Basophilic serine/threonine kinase	0.4088	0.00392114	ILK_HUMAN (swissprot)	T172	KDTFWKGtTRTRPRN	2.6702
		Akt Kinase	Basophilic serine/threonine kinase	0.4055	0.000659091	ILK_HUMAN (swissprot)	T181	RTRPRNGtLNKHSGI	1.50541
		PKC zeta	Basophilic serine/threonine kinase	0.4812	0.00879602	ILK_HUMAN (swissprot)	T181	RTRPRNGtLNKHSGI	1.50541
		14-3-3 Mode 1	Phosphoserine/threonine binding group	0.3656	0.00337952	ILK_HUMAN (swissprot)	S246	CPRLRIFsHPNVLPV	0.655005
		Itk Kinase	Tyrosine kinase group	0.4236	0.00799558	ILK_HUMAN (swissprot)	Y278	WMPYGSLyNVLHEGT	0.405646
		PKC mu	Basophilic serine/threonine kinase	0.4277	0.00624849	ILK_HUMAN (swissprot)	T285	YNVLHEGtNFVVDQS	0.60837
		PDK1 Binding	Kinase binding site group	0.6069	0.00982479	ILK_HUMAN (swissprot)	S343	SMADVKFsFQCPGRM	0.427513
		Intersectin SH3A	Src homology 3 group	0.6536	0.00822371	ILK_HUMAN (swissprot)	P414	EGLRPTIpPGISPHV	0.384532
		Erk D-domain	Kinase binding site group	0.5973	0.00832333	ILK_HUMAN (swissprot)	I442	KRPKFDMiVPILEKM	0.21358
Caveolin	Q03135	Crk SH2	Src homology 2 group	0.449	0.00927055	CAV1_HUMAN (swissprot)	Y14	VDSEGHLyTVPIREQ	0.667409
		Abl Kinase	Tyrosine kinase group	0.4543	0.00484861	CAV1_HUMAN (swissprot)	Y14	VDSEGHLyTVPIREQ	0.667409
		Itk Kinase	Tyrosine kinase group	0.4235	0.00797607	CAV1_HUMAN (swissprot)	Y14	VDSEGHLyTVPIREQ	0.667409
		Casein Kinase 1	Acidophilic serine/threonine kinase group	0.4054	0.00746351	CAV1_HUMAN (swissprot)	T93	KASFTTFtVTKYWFY	0.885381
		PDK1 Binding	Kinase binding site group	0.5654	0.00524326	CAV1_HUMAN (swissprot)	T93	KASFTTFtVTKYWFY	0.885381
		Akt Kinase	Basophilic serine/threonine kinase	0.5764	0.00971481	CAV1_HUMAN (swissprot)	S149	QCISRVYsIYVHTVC	0.291164
		Aurora A	Basophilic serine/threonine kinase	0.4787	0.00397726	CAV1_HUMAN (swissprot)	S149	QCISRVYsIYVHTVC	0.291164
PINCH-1	P48059	PDK1 Binding	Kinase binding site group	0.6061	0.00973464	LIMS1_HUMAN (swissprot)	E54	EGLFYEFeGRKYCEH	2.30705
		PDK1 Binding	Kinase binding site group	0.5435	0.0032987	LIMS1_HUMAN (swissprot)	D295	KNKFVEFdMKPVCKK	1.75631
Vasodilator-stimulated phosphoprotein (VASP)	P50552	Nck 2nd SH3	Src homology 3 group	0.4676	0.00319758	VASP_HUMAN (swissprot)	P119	ALEGGGPpPPPALPT	2.00475
		Cortactin SH3	Src homology 3 group	0.5238	0.00347472	VASP_HUMAN (swissprot)	P122	GGGPPPPpALPTWSV	1.09147
		Crk SH3	Src homology 3 group	0.431	0.00462871	VASP_HUMAN (swissprot)	P122	GGGPPPPpALPTWSV	1.09147
		Src SH3	Src homology 3 group	0.4449	0.00439715	VASP_HUMAN (swissprot)	P122	GGGPPPPpALPTWSV	1.09147
		Abl SH3	Src homology 3 group	0.4483	0.00717762	VASP_HUMAN (swissprot)	P130	ALPTWSVpNGPSPEE	0.900694
		Protein Kinase A	Basophilic serine/threonine kinase	0.4516	0.00827442	VASP_HUMAN (swissprot)	S157	EHIERRVsNAGGPPA	0.745374
		Crk SH3	Src homology 3 group	0.4614	0.00820615	VASP_HUMAN (swissprot)	P162	RVSNAGGpPAPPAGG	0.838253
		Nck 2nd SH3	Src homology 3 group	0.3864	0.000504941	VASP_HUMAN (swissprot)	P163	VSNAGGPpAPPAGGP	1.30977
		Intersectin SH3A	Src homology 3 group	0.5983	0.00375448	VASP_HUMAN (swissprot)	P165	NAGGPPApPAGGPPP	0.855716
		Abl SH3	Src homology 3 group	0.4344	0.00587162	VASP_HUMAN (swissprot)	P170	PAPPAGGpPPPPGPP	1.28304
		Abl SH3	Src homology 3 group	0.3373	0.00106928	VASP_HUMAN (swissprot)	P171	APPAGGPpPPPGPPP	2.00475
		Nck 2nd SH3	Src homology 3 group	0.5059	0.0069556	VASP_HUMAN (swissprot)	P171	APPAGGPpPPPGPPP	2.00475
		Itk SH3	Src homology 3 group	0.5962	0.00744987	VASP_HUMAN (swissprot)	P172	PPAGGPPpPPGPPPP	2.00475
		Cortactin SH3	Src homology 3 group	0.5592	0.00681116	VASP_HUMAN (swissprot)	P173	PAGGPPPpPGPPPPP	2.00475
		Crk SH3	Src homology 3 group	0.4564	0.00731464	VASP_HUMAN (swissprot)	P173	PAGGPPPpPGPPPPP	2.00475
		Amphiphysin SH3	Src homology 3 group	0.5707	0.00965409	VASP_HUMAN (swissprot)	P174	AGGPPPPpGPPPPPG	2.00475
		Nck 2nd SH3	Src homology 3 group	0.4147	0.00115233	VASP_HUMAN (swissprot)	P174	AGGPPPPpGPPPPPG	2.00475
		PLCg SH3	Src homology 3 group	0.5115	0.00409806	VASP_HUMAN (swissprot)	P174	AGGPPPPpGPPPPPG	2.00475
		Abl SH3	Src homology 3 group	0.4381	0.00621926	VASP_HUMAN (swissprot)	P176	GPPPPPGpPPPPGPP	2.00475
		Cortactin SH3	Src homology 3 group	0.5744	0.00865086	VASP_HUMAN (swissprot)	P176	GPPPPPGpPPPPGPP	2.00475
		Grb2 SH3	Src homology 3 group	0.4852	0.00969752	VASP_HUMAN (swissprot)	P176	GPPPPPGpPPPPGPP	2.00475
		Intersectin SH3A	Src homology 3 group	0.6569	0.00853766	VASP_HUMAN (swissprot)	P176	GPPPPPGpPPPPGPP	2.00475
		Src SH3	Src homology 3 group	0.495	0.00973506	VASP_HUMAN (swissprot)	P176	GPPPPPGpPPPPGPP	2.00475
		Abl SH3	Src homology 3 group	0.3849	0.00260155	VASP_HUMAN (swissprot)	P177	PPPPPGPpPPPGPPP	2.00475
		Nck 2nd SH3	Src homology 3 group	0.5059	0.0069556	VASP_HUMAN (swissprot)	P177	PPPPPGPpPPPGPPP	2.00475
		PLCg SH3	Src homology 3 group	0.5131	0.00418848	VASP_HUMAN (swissprot)	P177	PPPPPGPpPPPGPPP	2.00475
		Abl SH3	Src homology 3 group	0.3956	0.00308835	VASP_HUMAN (swissprot)	P179	PPPGPPPpPGPPPPP	2.00475
		Cortactin SH3	Src homology 3 group	0.5837	0.00997878	VASP_HUMAN (swissprot)	P179	PPPGPPPpPGPPPPP	2.00475
		Amphiphysin SH3	Src homology 3 group	0.5565	0.00761383	VASP_HUMAN (swissprot)	P180	PPGPPPPpGPPPPPG	2.00475
		Nck 2nd SH3	Src homology 3 group	0.4292	0.00154585	VASP_HUMAN (swissprot)	P180	PPGPPPPpGPPPPPG	2.00475
		PLCg SH3	Src homology 3 group	0.5218	0.00468017	VASP_HUMAN (swissprot)	P180	PPGPPPPpGPPPPPG	2.00475
		Abl SH3	Src homology 3 group	0.4655	0.0093703	VASP_HUMAN (swissprot)	P182	GPPPPPGpPPPPGLP	2.00475
		Cortactin SH3	Src homology 3 group	0.4868	0.00158326	VASP_HUMAN (swissprot)	P182	GPPPPPGpPPPPGLP	2.00475
		Grb2 SH3	Src homology 3 group	0.4852	0.00969752	VASP_HUMAN (swissprot)	P182	GPPPPPGpPPPPGLP	2.00475
		PLCg SH3	Src homology 3 group	0.4818	0.00241955	VASP_HUMAN (swissprot)	P182	GPPPPPGpPPPPGLP	2.00475
		Abl SH3	Src homology 3 group	0.3688	0.00190413	VASP_HUMAN (swissprot)	P183	PPPPPGPpPPPGLPP	2.00475
		Nck 2nd SH3	Src homology 3 group	0.5059	0.0069556	VASP_HUMAN (swissprot)	P183	PPPPPGPpPPPGLPP	2.00475
		p85 SH3 mode1	Src homology 3 group	0.573	0.00688076	VASP_HUMAN (swissprot)	P183	PPPPPGPpPPPGLPP	2.00475
		PLCg SH3	Src homology 3 group	0.5131	0.00418848	VASP_HUMAN (swissprot)	P183	PPPPPGPpPPPGLPP	2.00475
		Crk SH3	Src homology 3 group	0.4194	0.00371982	VASP_HUMAN (swissprot)	P186	PPGPPPPpGLPPSGV	1.0692
		Src SH3	Src homology 3 group	0.4685	0.00659173	VASP_HUMAN (swissprot)	P186	PPGPPPPpGLPPSGV	1.0692
		Abl SH3	Src homology 3 group	0.4675	0.0096339	VASP_HUMAN (swissprot)	P206	GAGGGPPpAPPLPAA	2.04652
		Itk SH3	Src homology 3 group	0.603	0.00863553	VASP_HUMAN (swissprot)	P206	GAGGGPPpAPPLPAA	2.04652
		Nck 2nd SH3	Src homology 3 group	0.4631	0.00292571	VASP_HUMAN (swissprot)	P206	GAGGGPPpAPPLPAA	2.04652
		Cortactin SH3	Src homology 3 group	0.5163	0.00300514	VASP_HUMAN (swissprot)	P208	GGGPPPApPLPAAQG	1.09147
		Crk SH3	Src homology 3 group	0.4049	0.00258372	VASP_HUMAN (swissprot)	P208	GGGPPPApPLPAAQG	1.09147
		Grb2 SH3	Src homology 3 group	0.4599	0.00565839	VASP_HUMAN (swissprot)	P208	GGGPPPApPLPAAQG	1.09147
		Intersectin SH3A	Src homology 3 group	0.5116	0.00117037	VASP_HUMAN (swissprot)	P208	GGGPPPApPLPAAQG	1.09147
		Src SH3	Src homology 3 group	0.4897	0.00910639	VASP_HUMAN (swissprot)	P208	GGGPPPApPLPAAQG	1.09147
		PLCg SH3	Src homology 3 group	0.5466	0.00823522	VASP_HUMAN (swissprot)	P209	GGPPPAPpLPAAQGP	0.713097
		Protein Kinase A	Basophilic serine/threonine kinase	0.4387	0.00734434	VASP_HUMAN (swissprot)	S239	GAKLRKVsKQEEASG	2.7342
		Casein Kinase 1	Acidophilic serine/threonine kinase group	0.4109	0.00859831	VASP_HUMAN (swissprot)	S258	PKAESGRsGGGGLME	0.576919
		Protein Kinase A	Basophilic serine/threonine kinase	0.4522	0.00832066	VASP_HUMAN (swissprot)	T278	LARRRKAtQVGEKTP	0.849966
		Calmodulin dependent Kinase 2	Basophilic serine/threonine kinase	0.4823	0.00684162	VASP_HUMAN (swissprot)	S322	TTLPRMKsSSSVTTS	1.46278
		AMP_Kinase	Basophilic serine/threonine kinase	0.475	0.000575612	VASP_HUMAN (swissprot)	S322	TTLPRMKsSSSVTTS	1.46278
		PKC epsilon	Basophilic serine/threonine kinase	0.4275	0.00714817	VASP_HUMAN (swissprot)	S325	PRMKSSSsVTTSETQ	0.852612
		AMP_Kinase	Basophilic serine/threonine kinase	0.5656	0.003564	VASP_HUMAN (swissprot)	S325	PRMKSSSsVTTSETQ	0.852612
		GSK3-improved	Acidophilic serine/threonine kinase group	0.4362	0.00558158	VASP_HUMAN (swissprot)	T335	TSETQPCtPSSSDYS	0.761261
		Erk1 Kinase	Proline-dependent serine/threonine kinase group	0.5065	0.0071646	VASP_HUMAN (swissprot)	T335	TSETQPCtPSSSDYS	0.761261
		CDK1 motif 1 - [ST]Px[KR]x	Proline-dependent serine/threonine kinase group	0.4151	0.00732623	VASP_HUMAN (swissprot)	T335	TSETQPCtPSSSDYS	0.761261
		CDK1 motif 2 - [ST]PxxK	Proline-dependent serine/threonine kinase group	0.3819	0.00411478	VASP_HUMAN (swissprot)	T335	TSETQPCtPSSSDYS	0.761261
		Protein Kinase A	Basophilic serine/threonine kinase	0.2796	0.000795233	VASP_HUMAN (swissprot)	S379	QELRKRGsP******	3.91248
Parvin	Q9NVD7	GSK3-improved	Acidophilic serine/threonine kinase group	0.4612	0.00838228	PARVA_HUMAN (swissprot)	S10	TSPQKSPsVPKSPTP	1.46062
		14-3-3 Mode 1	Phosphoserine/threonine binding group	0.4026	0.00529888	PARVA_HUMAN (swissprot)	S10	TSPQKSPsVPKSPTP	1.46062
		p85 SH3 mode2	Src homology 3 group	0.583	0.00668528	PARVA_HUMAN (swissprot)	P12	PQKSPSVpKSPTPKS	1.46062
		Cdc2 Kinase	Proline-dependent serine/threonine kinase group	0.4097	0.00158796	PARVA_HUMAN (swissprot)	S14	KSPSVPKsPTPKSPP	3.27702
		Cdk5 Kinase	Proline-dependent serine/threonine kinase group	0.3856	0.00226496	PARVA_HUMAN (swissprot)	S14	KSPSVPKsPTPKSPP	3.27702
		Erk1 Kinase	Proline-dependent serine/threonine kinase group	0.4303	0.00168307	PARVA_HUMAN (swissprot)	S14	KSPSVPKsPTPKSPP	3.27702
		CDK1 motif 1 - [ST]Px[KR]x	Proline-dependent serine/threonine kinase group	0.4037	0.00667587	PARVA_HUMAN (swissprot)	S14	KSPSVPKsPTPKSPP	3.27702
		CDK1 motif 2 - [ST]PxxK	Proline-dependent serine/threonine kinase group	0.2249	0.000355513	PARVA_HUMAN (swissprot)	S14	KSPSVPKsPTPKSPP	3.27702
		CDK1 motif 2 - [ST]PxxK	Proline-dependent serine/threonine kinase group	0.4422	0.00975204	PARVA_HUMAN (swissprot)	T16	PSVPKSPtPKSPPSR	2.84009
		Amphiphysin SH3	Src homology 3 group	0.5643	0.00858401	PARVA_HUMAN (swissprot)	P17	SVPKSPTpKSPPSRK	3.27702
		Cdc2 Kinase	Proline-dependent serine/threonine kinase group	0.2919	0.000134993	PARVA_HUMAN (swissprot)	S19	PKSPTPKsPPSRKKD	3.04295
		Cdk5 Kinase	Proline-dependent serine/threonine kinase group	0.2559	0.000202238	PARVA_HUMAN (swissprot)	S19	PKSPTPKsPPSRKKD	3.04295
		Erk1 Kinase	Proline-dependent serine/threonine kinase group	0.4941	0.00569642	PARVA_HUMAN (swissprot)	S19	PKSPTPKsPPSRKKD	3.04295
		PKC alpha/beta/gamma	Basophilic serine/threonine kinase	0.4167	0.00463595	PARVA_HUMAN (swissprot)	T36	FLGKLGGtLARRKKA	0.528534
		Erk1 Kinase	Proline-dependent serine/threonine kinase group	0.3498	0.000292181	PARVA_HUMAN (swissprot)	S62	NAINLPLsPIPFELD	0.65637
		Casein Kinase 2	Acidophilic serine/threonine kinase group	0.4749	0.00839275	PARVA_HUMAN (swissprot)	T73	FELDPEDtMLEENEV	1.35193
		ATM Kinase	DNA damage kinase group	0.4807	0.00522518	PARVA_HUMAN (swissprot)	T316	PLHSFFLtPDSFEQK	0.817296
		PLK1 Kinase	Acidophilic serine/threonine kinase group	0.2567	0.00161973	PARVA_HUMAN (swissprot)	S328	EQKVLNVsFAFELMQ	0.288342
Vinculin	P18206	DNA PK	DNA damage kinase group	0.512	0.00878682	VINC_HUMAN (swissprot)	T65	GKETVQTtEDQILKR	4.1403
		ATM Kinase	DNA damage kinase group	0.5128	0.00920656	VINC_HUMAN (swissprot)	T153	TVAEVVEtMEDLVTY	1.21674
		Calmodulin dependent Kinase 2	Basophilic serine/threonine kinase	0.4286	0.00224456	VINC_HUMAN (swissprot)	T233	ALKNRNFtVEKMSAE	1.22942
		Casein Kinase 1	Acidophilic serine/threonine kinase group	0.3919	0.00538715	VINC_HUMAN (swissprot)	T603	SDVFSDTtTPIKLLA	1.2469
		CDK1 motif 1 - [ST]Px[KR]x	Proline-dependent serine/threonine kinase group	0.2724	0.00175236	VINC_HUMAN (swissprot)	T604	DVFSDTTtPIKLLAV	1.4932
		CDK1 motif 2 - [ST]PxxK	Proline-dependent serine/threonine kinase group	0.4329	0.00861834	VINC_HUMAN (swissprot)	T604	DVFSDTTtPIKLLAV	1.4932
		Erk D-domain	Kinase binding site group	0.5289	0.00328658	VINC_HUMAN (swissprot)	L765	RRANRILlVAKREVE	0.163826
		Nck 2nd SH3	Src homology 3 group	0.4169	0.00121359	VINC_HUMAN (swissprot)	P844	PQEPDFPpPPPDLEQ	1.75416
		Crk SH3	Src homology 3 group	0.4547	0.00701153	VINC_HUMAN (swissprot)	P861	LTDELAPpKPPLPEG	2.64683
		Nck 2nd SH3	Src homology 3 group	0.5138	0.00779385	VINC_HUMAN (swissprot)	P861	LTDELAPpKPPLPEG	2.64683
		Grb2 SH3	Src homology 3 group	0.4809	0.00901103	VINC_HUMAN (swissprot)	P863	DELAPPKpPLPEGEV	2.16067
		Amphiphysin SH3	Src homology 3 group	0.5038	0.00260779	VINC_HUMAN (swissprot)	P872	LPEGEVPpPRPPPPE	1.90451
		Cortactin SH3	Src homology 3 group	0.5744	0.00865086	VINC_HUMAN (swissprot)	P875	GEVPPPRpPPPEEKD	3.96773
		Intersectin SH3A	Src homology 3 group	0.6569	0.00853766	VINC_HUMAN (swissprot)	P875	GEVPPPRpPPPEEKD	3.96773
		Casein Kinase 2	Acidophilic serine/threonine kinase group	0.4495	0.00561023	VINC_HUMAN (swissprot)	S1084	TNISDEEsEQATEML	2.79087
Zyxin	Q15942	Nck 2nd SH3	Src homology 3 group	0.4631	0.00292571	ZYX_HUMAN (swissprot)	P65	GRVGEIPpPPPEDFP	1.42003
		Abl SH3	Src homology 3 group	0.2612	0.000132728	ZYX_HUMAN (swissprot)	P74	PPEDFPLpPPPLAGD	1.67063
		Cortactin SH3	Src homology 3 group	0.5819	0.00959002	ZYX_HUMAN (swissprot)	P74	PPEDFPLpPPPLAGD	1.67063
		Grb2 SH3	Src homology 3 group	0.3493	0.000346763	ZYX_HUMAN (swissprot)	P74	PPEDFPLpPPPLAGD	1.67063
		Itk SH3	Src homology 3 group	0.6055	0.00918208	ZYX_HUMAN (swissprot)	P74	PPEDFPLpPPPLAGD	1.67063
		p85 SH3 mode1	Src homology 3 group	0.5797	0.00763541	ZYX_HUMAN (swissprot)	P74	PPEDFPLpPPPLAGD	1.67063
		Src SH3	Src homology 3 group	0.409	0.00209974	ZYX_HUMAN (swissprot)	P74	PPEDFPLpPPPLAGD	1.67063
		Grb2 SH3	Src homology 3 group	0.4761	0.00824471	ZYX_HUMAN (swissprot)	P76	EDFPLPPpPLAGDGD	1.09147
		Abl SH3	Src homology 3 group	0.3454	0.00124899	ZYX_HUMAN (swissprot)	P96	LGGAFPPpPPPIEES	3.13242
		Nck 2nd SH3	Src homology 3 group	0.5138	0.00779385	ZYX_HUMAN (swissprot)	P96	LGGAFPPpPPPIEES	3.13242
		Intersectin SH3A	Src homology 3 group	0.6644	0.00925117	ZYX_HUMAN (swissprot)	P97	GGAFPPPpPPIEESF	1.42003
		Nck 2nd SH3	Src homology 3 group	0.4355	0.00172915	ZYX_HUMAN (swissprot)	P115	PLEEEIFpSPPPPPE	0.689188
		Erk1 Kinase	Proline-dependent serine/threonine kinase group	0.4118	0.0011515	ZYX_HUMAN (swissprot)	S116	LEEEIFPsPPPPPEE	1.52027
		Abl SH3	Src homology 3 group	0.4638	0.00914625	ZYX_HUMAN (swissprot)	P117	EEEIFPSpPPPPEEE	2.71477
		Nck 2nd SH3	Src homology 3 group	0.49	0.00522548	ZYX_HUMAN (swissprot)	P118	EEIFPSPpPPPEEEG	2.71477
		Abl SH3	Src homology 3 group	0.4628	0.00901445	ZYX_HUMAN (swissprot)	P132	GGPEAPIpPPPQPRE	1.42003
		Amphiphysin SH3	Src homology 3 group	0.572	0.00990411	ZYX_HUMAN (swissprot)	P132	GGPEAPIpPPPQPRE	1.42003
		Src SH3	Src homology 3 group	0.4767	0.00756438	ZYX_HUMAN (swissprot)	P132	GGPEAPIpPPPQPRE	1.42003
		Itk SH3	Src homology 3 group	0.6069	0.00948815	ZYX_HUMAN (swissprot)	P133	GPEAPIPpPPQPREK	1.59044
		Akt Kinase	Basophilic serine/threonine kinase	0.5006	0.00330943	ZYX_HUMAN (swissprot)	S143	QPREKVSsIDLEIDS	0.294894
		Erk D-domain	Kinase binding site group	0.602	0.00887814	ZYX_HUMAN (swissprot)	I144	PREKVSSiDLEIDSL	0.688086
		Aurora A	Basophilic serine/threonine kinase	0.5154	0.00625297	ZYX_HUMAN (swissprot)	S169	DPFKARVsSGYVPPP	0.927727
		PLCg C-terminal SH2	Src homology 2 group	0.4257	0.00901737	ZYX_HUMAN (swissprot)	Y172	KARVSSGyVPPPVAT	0.845096
		Abl SH3	Src homology 3 group	0.443	0.00667965	ZYX_HUMAN (swissprot)	P175	VSSGYVPpPVATPFS	0.471517
		GSK3 Kinase	Acidophilic serine/threonine kinase group	0.4662	0.0033637	ZYX_HUMAN (swissprot)	T179	YVPPPVAtPFSSKSS	0.444973
		GSK3-improved	Acidophilic serine/threonine kinase group	0.4313	0.0051046	ZYX_HUMAN (swissprot)	T179	YVPPPVAtPFSSKSS	0.444973
		Abl SH3	Src homology 3 group	0.4391	0.00631322	ZYX_HUMAN (swissprot)	P196	PAAGGTApLPPWKSP	1.01871
		Cbl-Associated protein C-SH3	Src homology 3 group	0.6136	0.00254723	ZYX_HUMAN (swissprot)	P199	GGTAPLPpWKSPSSS	1.27336
		p85 SH3 mode2	Src homology 3 group	0.5767	0.00611005	ZYX_HUMAN (swissprot)	P199	GGTAPLPpWKSPSSS	1.27336
		AMP_Kinase	Basophilic serine/threonine kinase	0.5863	0.00520988	ZYX_HUMAN (swissprot)	S205	PPWKSPSsSQPLPQV	2.28378
		Grb2 SH3	Src homology 3 group	0.4733	0.00779769	ZYX_HUMAN (swissprot)	P210	PSSSQPLpQVPAPAQ	0.898128
		Src SH3	Src homology 3 group	0.4602	0.00580993	ZYX_HUMAN (swissprot)	P210	PSSSQPLpQVPAPAQ	0.898128
		Erk1 Kinase	Proline-dependent serine/threonine kinase group	0.452	0.00258725	ZYX_HUMAN (swissprot)	S259	PRGPPASsPAPAPKF	1.00428
		Erk1 Kinase	Proline-dependent serine/threonine kinase group	0.5256	0.00963695	ZYX_HUMAN (swissprot)	S308	ALSAGTGsPQPPSFT	1.81621
		CDK1 motif 1 - [ST]Px[KR]x	Proline-dependent serine/threonine kinase group	0.4289	0.00831474	ZYX_HUMAN (swissprot)	S308	ALSAGTGsPQPPSFT	1.81621
		CDK1 motif 2 - [ST]PxxK	Proline-dependent serine/threonine kinase group	0.3965	0.00513307	ZYX_HUMAN (swissprot)	S308	ALSAGTGsPQPPSFT	1.81621
		PDK1 Binding	Kinase binding site group	0.5827	0.00711852	ZYX_HUMAN (swissprot)	T315	SPQPPSFtYAQQREK	1.05211
		ATM Kinase	DNA damage kinase group	0.5122	0.00912238	ZYX_HUMAN (swissprot)	T363	VEELEQLtQQLMQDM	1.16834
Palladin	Q8WX93	Casein Kinase 1	Acidophilic serine/threonine kinase group	0.4045	0.00727781	PALLD_HUMAN (swissprot)	S9	SGTSSHEsFYDSLSD	1.63982
		ATM Kinase	DNA damage kinase group	0.3632	0.000430458	PALLD_HUMAN (swissprot)	S35	PGLSAFLsQEEINKS	1.13913
		DNA PK	DNA damage kinase group	0.4133	0.0016227	PALLD_HUMAN (swissprot)	S35	PGLSAFLsQEEINKS	1.13913
		Casein Kinase 2	Acidophilic serine/threonine kinase group	0.3659	0.00151501	PALLD_HUMAN (swissprot)	T55	RAIADSEtEDFDSEK	1.92228
		Casein Kinase 2	Acidophilic serine/threonine kinase group	0.4493	0.00559161	PALLD_HUMAN (swissprot)	S60	SETEDFDsEKEISQI	2.66373
		14-3-3 Mode 1	Phosphoserine/threonine binding group	0.4506	0.00924372	PALLD_HUMAN (swissprot)	S114	EKQTKSIsSPVSKRK	0.443706
		Cdc2 Kinase	Proline-dependent serine/threonine kinase group	0.4851	0.00581842	PALLD_HUMAN (swissprot)	S115	KQTKSISsPVSKRKP	0.443706
		Cdk5 Kinase	Proline-dependent serine/threonine kinase group	0.4202	0.00405291	PALLD_HUMAN (swissprot)	S115	KQTKSISsPVSKRKP	0.443706
		CDK1 motif 1 - [ST]Px[KR]x	Proline-dependent serine/threonine kinase group	0.3698	0.00508691	PALLD_HUMAN (swissprot)	S115	KQTKSISsPVSKRKP	0.443706
		CDK1 motif 2 - [ST]PxxK	Proline-dependent serine/threonine kinase group	0.1891	0.000168006	PALLD_HUMAN (swissprot)	S115	KQTKSISsPVSKRKP	0.443706
		GSK3 Kinase	Acidophilic serine/threonine kinase group	0.5132	0.00816447	PALLD_HUMAN (swissprot)	S125	SKRKPAMsPLLTRPS	0.322883
		GSK3-improved	Acidophilic serine/threonine kinase group	0.4635	0.00872054	PALLD_HUMAN (swissprot)	S125	SKRKPAMsPLLTRPS	0.322883
		Cdc2 Kinase	Proline-dependent serine/threonine kinase group	0.3435	0.000445268	PALLD_HUMAN (swissprot)	T156	STNVKPKtPHQRKGG	3.72673
		Cdk5 Kinase	Proline-dependent serine/threonine kinase group	0.3127	0.000661352	PALLD_HUMAN (swissprot)	T156	STNVKPKtPHQRKGG	3.72673
		GSK3-improved	Acidophilic serine/threonine kinase group	0.4216	0.00423634	PALLD_HUMAN (swissprot)	S202	GESSSPDsGYLSPKN	1.01411
		Nck SH2	Src homology 2 group	0.4709	0.00994991	PALLD_HUMAN (swissprot)	Y204	SSSPDSGyLSPKNQP	0.813796
		Erk1 Kinase	Proline-dependent serine/threonine kinase group	0.4679	0.00348017	PALLD_HUMAN (swissprot)	S206	SPDSGYLsPKNQPSA	2.04936
		GSK3 Kinase	Acidophilic serine/threonine kinase group	0.5221	0.0094571	PALLD_HUMAN (swissprot)	S216	NQPSALLsASASQSP	0.285661
		Cdk5 Kinase	Proline-dependent serine/threonine kinase group	0.4839	0.00983007	PALLD_HUMAN (swissprot)	S236	EMEREVKsPGARHCY	0.704691
		ATM Kinase	DNA damage kinase group	0.5	0.00741062	PALLD_HUMAN (swissprot)	S279	RFIQKLRsQEVAEGS	1.10426
		DNA PK	DNA damage kinase group	0.4982	0.00705972	PALLD_HUMAN (swissprot)	S356	PSGSDTTsAEVFIEG	0.830615
		GSK3-improved	Acidophilic serine/threonine kinase group	0.4495	0.00687622	PALLD_HUMAN (swissprot)	S365	EVFIEGAsSTDSDSE	0.991653
		Calmodulin dependent Kinase 2	Basophilic serine/threonine kinase	0.4654	0.00485922	PALLD_HUMAN (swissprot)	S392	QAQKKTTsVSLTIGS	0.524684
		Casein Kinase 1	Acidophilic serine/threonine kinase group	0.4018	0.00672072	PALLD_HUMAN (swissprot)	S394	QKKTTSVsLTIGSSS	0.254847
		Erk D-domain	Kinase binding site group	0.4689	0.00136589	PALLD_HUMAN (swissprot)	L395	KKTTSVSlTIGSSSP	0.188194
		CDK1 motif 1 - [ST]Px[KR]x	Proline-dependent serine/threonine kinase group	0.4393	0.00913528	PALLD_HUMAN (swissprot)	S401	SLTIGSSsPKTGVTT	2.46141
		CDK1 motif 2 - [ST]PxxK	Proline-dependent serine/threonine kinase group	0.4074	0.00603316	PALLD_HUMAN (swissprot)	S401	SLTIGSSsPKTGVTT	2.46141
		Calmodulin dependent Kinase 2	Basophilic serine/threonine kinase	0.4644	0.00477122	PALLD_HUMAN (swissprot)	S479	VQWFRQGsEIQDSPD	1.10658
		p85 SH2	Src homology 2 group	0.3984	0.00263022	PALLD_HUMAN (swissprot)	Y548	ANTENCSyESMGESN	0.592443
		Nck 2nd SH3	Src homology 3 group	0.4755	0.00384624	PALLD_HUMAN (swissprot)	P564	DHFQHFPpPPPILET	1.75416
		Erk1 Kinase	Proline-dependent serine/threonine kinase group	0.4864	0.00481069	PALLD_HUMAN (swissprot)	S641	PTPAVLLsPTKEPPP	0.932131
		CDK1 motif 1 - [ST]Px[KR]x	Proline-dependent serine/threonine kinase group	0.3552	0.00450658	PALLD_HUMAN (swissprot)	S641	PTPAVLLsPTKEPPP	0.932131
		Src SH3	Src homology 3 group	0.4867	0.00875055	PALLD_HUMAN (swissprot)	P648	SPTKEPPpLLAKPKL	0.58212
		p85 SH3 mode1	Src homology 3 group	0.5938	0.00950216	PALLD_HUMAN (swissprot)	P679	EAGARQPpPAPRSAP	2.2921
		Src SH3	Src homology 3 group	0.4968	0.00994857	PALLD_HUMAN (swissprot)	P679	EAGARQPpPAPRSAP	2.2921
		Abl SH3	Src homology 3 group	0.4437	0.00674542	PALLD_HUMAN (swissprot)	P680	AGARQPPpAPRSAPP	2.59225
		GSK3 Kinase	Acidophilic serine/threonine kinase group	0.4843	0.00463979	PALLD_HUMAN (swissprot)	S684	QPPPAPRsAPPSPPF	2.24662
		GSK3-improved	Acidophilic serine/threonine kinase group	0.4345	0.00541609	PALLD_HUMAN (swissprot)	S684	QPPPAPRsAPPSPPF	2.24662
		Erk1 Kinase	Proline-dependent serine/threonine kinase group	0.4699	0.00362401	PALLD_HUMAN (swissprot)	S684	QPPPAPRsAPPSPPF	2.24662
		Abl SH3	Src homology 3 group	0.4371	0.00612531	PALLD_HUMAN (swissprot)	P686	PPAPRSApPSPPFPP	1.53716
		p85 SH3 mode1	Src homology 3 group	0.5749	0.00706243	PALLD_HUMAN (swissprot)	P686	PPAPRSApPSPPFPP	1.53716
		Src SH3	Src homology 3 group	0.4921	0.00939107	PALLD_HUMAN (swissprot)	P686	PPAPRSApPSPPFPP	1.53716
		Abl SH3	Src homology 3 group	0.3826	0.00249691	PALLD_HUMAN (swissprot)	P687	PAPRSAPpSPPFPPP	1.77365
		Nck 2nd SH3	Src homology 3 group	0.4169	0.00121359	PALLD_HUMAN (swissprot)	P687	PAPRSAPpSPPFPPP	1.77365
		GSK3 Kinase	Acidophilic serine/threonine kinase group	0.4499	0.00230211	PALLD_HUMAN (swissprot)	S688	APRSAPPsPPFPPPP	1.52027
		Erk1 Kinase	Proline-dependent serine/threonine kinase group	0.2959	7.67333e-05	PALLD_HUMAN (swissprot)	S688	APRSAPPsPPFPPPP	1.52027
		Cortactin SH3	Src homology 3 group	0.5514	0.00586711	PALLD_HUMAN (swissprot)	P689	PRSAPPSpPFPPPPA	1.52027
		Grb2 SH3	Src homology 3 group	0.436	0.00360971	PALLD_HUMAN (swissprot)	P689	PRSAPPSpPFPPPPA	1.52027
		Cortactin SH3	Src homology 3 group	0.5694	0.00804569	PALLD_HUMAN (swissprot)	P692	APPSPPFpPPPAFPE	1.75416
		GSK3 Kinase	Acidophilic serine/threonine kinase group	0.5058	0.0070897	PALLD_HUMAN (swissprot)	T704	FPELAACtPPASPEP	0.432612
		GSK3-improved	Acidophilic serine/threonine kinase group	0.4612	0.00838228	PALLD_HUMAN (swissprot)	T704	FPELAACtPPASPEP	0.432612
		Erk1 Kinase	Proline-dependent serine/threonine kinase group	0.4947	0.00576746	PALLD_HUMAN (swissprot)	S708	AACTPPAsPEPMSAL	1.98648
		Cbl-Associated protein C-SH3	Src homology 3 group	0.6456	0.00379171	PALLD_HUMAN (swissprot)	P709	ACTPPASpEPMSALA	1.27135
		GSK3 Kinase	Acidophilic serine/threonine kinase group	0.3204	0.000155037	PALLD_HUMAN (swissprot)	T751	GPASGHGtPASSPSS	0.932323
		GSK3-improved	Acidophilic serine/threonine kinase group	0.2729	0.000143302	PALLD_HUMAN (swissprot)	T751	GPASGHGtPASSPSS	0.932323
		CDK1 motif 2 - [ST]PxxK	Proline-dependent serine/threonine kinase group	0.4182	0.0070444	PALLD_HUMAN (swissprot)	T751	GPASGHGtPASSPSS	0.932323
		GSK3 Kinase	Acidophilic serine/threonine kinase group	0.4715	0.00373736	PALLD_HUMAN (swissprot)	S755	GHGTPASsPSSSSLP	1.15458
		GSK3-improved	Acidophilic serine/threonine kinase group	0.3851	0.00222292	PALLD_HUMAN (swissprot)	S755	GHGTPASsPSSSSLP	1.15458
		CDK1 motif 1 - [ST]Px[KR]x	Proline-dependent serine/threonine kinase group	0.3855	0.00578547	PALLD_HUMAN (swissprot)	S755	GHGTPASsPSSSSLP	1.15458
		CDK1 motif 2 - [ST]PxxK	Proline-dependent serine/threonine kinase group	0.3506	0.00254645	PALLD_HUMAN (swissprot)	S755	GHGTPASsPSSSSLP	1.15458
		GSK3 Kinase	Acidophilic serine/threonine kinase group	0.469	0.00356111	PALLD_HUMAN (swissprot)	S759	PASSPSSsSLPSPMS	0.942513
		GSK3-improved	Acidophilic serine/threonine kinase group	0.3512	0.00101612	PALLD_HUMAN (swissprot)	S759	PASSPSSsSLPSPMS	0.942513
		CDK1 motif 2 - [ST]PxxK	Proline-dependent serine/threonine kinase group	0.4341	0.00875318	PALLD_HUMAN (swissprot)	S763	PSSSSLPsPMSPTPR	0.803088
		Amphiphysin SH3	Src homology 3 group	0.5643	0.00858401	PALLD_HUMAN (swissprot)	P764	SSSSLPSpMSPTPRQ	1.50579
		Cdc2 Kinase	Proline-dependent serine/threonine kinase group	0.481	0.00542552	PALLD_HUMAN (swissprot)	S766	SSLPSPMsPTPRQFG	1.62162
		Cdk5 Kinase	Proline-dependent serine/threonine kinase group	0.464	0.0075938	PALLD_HUMAN (swissprot)	S766	SSLPSPMsPTPRQFG	1.62162
		Erk1 Kinase	Proline-dependent serine/threonine kinase group	0.3946	0.000775581	PALLD_HUMAN (swissprot)	S766	SSLPSPMsPTPRQFG	1.62162
		p38 MAPK	Proline-dependent serine/threonine kinase group	0.3132	0.00391994	PALLD_HUMAN (swissprot)	S766	SSLPSPMsPTPRQFG	1.62162
		CDK1 motif 1 - [ST]Px[KR]x	Proline-dependent serine/threonine kinase group	0.4421	0.00935667	PALLD_HUMAN (swissprot)	S766	SSLPSPMsPTPRQFG	1.62162
		CDK1 motif 2 - [ST]PxxK	Proline-dependent serine/threonine kinase group	0.4105	0.00629378	PALLD_HUMAN (swissprot)	S766	SSLPSPMsPTPRQFG	1.62162
		Cortactin SH3	Src homology 3 group	0.5473	0.00537088	PALLD_HUMAN (swissprot)	P778	QFGRAPVpPFAQPFG	0.550103
		GSK3-improved	Acidophilic serine/threonine kinase group	0.4508	0.00700276	PALLD_HUMAN (swissprot)	S794	EPEAPWGsSSPSPPP	0.887412
		Erk1 Kinase	Proline-dependent serine/threonine kinase group	0.3881	0.000686083	PALLD_HUMAN (swissprot)	S796	EAPWGSSsPSPPPPP	1.76721
		CDK1 motif 1 - [ST]Px[KR]x	Proline-dependent serine/threonine kinase group	0.4488	0.00995963	PALLD_HUMAN (swissprot)	S796	EAPWGSSsPSPPPPP	1.76721
		CDK1 motif 2 - [ST]PxxK	Proline-dependent serine/threonine kinase group	0.4175	0.00697581	PALLD_HUMAN (swissprot)	S796	EAPWGSSsPSPPPPP	1.76721
		Nck 2nd SH3	Src homology 3 group	0.5245	0.00918888	PALLD_HUMAN (swissprot)	P797	APWGSSSpSPPPPPP	2.03909
		GSK3 Kinase	Acidophilic serine/threonine kinase group	0.4951	0.00553565	PALLD_HUMAN (swissprot)	S798	PWGSSSPsPPPPPPP	2.3528
		Erk1 Kinase	Proline-dependent serine/threonine kinase group	0.3387	0.000231018	PALLD_HUMAN (swissprot)	S798	PWGSSSPsPPPPPPP	2.3528
		Itk SH3	Src homology 3 group	0.5488	0.00286619	PALLD_HUMAN (swissprot)	P799	WGSSSPSpPPPPPPV	2.71477
		Src SH3	Src homology 3 group	0.4353	0.00362497	PALLD_HUMAN (swissprot)	P799	WGSSSPSpPPPPPPV	2.71477
		Crk SH3	Src homology 3 group	0.4342	0.00487943	PALLD_HUMAN (swissprot)	P800	GSSSPSPpPPPPPVF	2.71477
		Itk SH3	Src homology 3 group	0.6055	0.00918208	PALLD_HUMAN (swissprot)	P801	SSSPSPPpPPPPVFS	3.13242
		Src SH3	Src homology 3 group	0.4483	0.0047111	PALLD_HUMAN (swissprot)	P801	SSSPSPPpPPPPVFS	3.13242
		Abl SH3	Src homology 3 group	0.4586	0.0084609	PALLD_HUMAN (swissprot)	P802	SSPSPPPpPPPVFSP	3.13242
		Cortactin SH3	Src homology 3 group	0.5264	0.00363751	PALLD_HUMAN (swissprot)	P802	SSPSPPPpPPPVFSP	3.13242
		Crk SH3	Src homology 3 group	0.4679	0.00936511	PALLD_HUMAN (swissprot)	P802	SSPSPPPpPPPVFSP	3.13242
		Nck 2nd SH3	Src homology 3 group	0.4993	0.00625228	PALLD_HUMAN (swissprot)	P802	SSPSPPPpPPPVFSP	3.13242
		Intersectin SH3A	Src homology 3 group	0.6611	0.00893722	PALLD_HUMAN (swissprot)	P803	SPSPPPPpPPVFSPT	1.50356
		Intersectin SH3A	Src homology 3 group	0.6611	0.00893722	PALLD_HUMAN (swissprot)	P804	PSPPPPPpPVFSPTA	0.841995
		Nck 2nd SH3	Src homology 3 group	0.5245	0.00918888	PALLD_HUMAN (swissprot)	P820	FPVPDVFpLPPPPPP	0.449064
		Abl SH3	Src homology 3 group	0.3321	0.000958564	PALLD_HUMAN (swissprot)	P822	VPDVFPLpPPPPPLP	1.67063
		Cortactin SH3	Src homology 3 group	0.4942	0.00177742	PALLD_HUMAN (swissprot)	P822	VPDVFPLpPPPPPLP	1.67063
		Grb2 SH3	Src homology 3 group	0.4294	0.00315142	PALLD_HUMAN (swissprot)	P822	VPDVFPLpPPPPPLP	1.67063
		Src SH3	Src homology 3 group	0.399	0.00178294	PALLD_HUMAN (swissprot)	P822	VPDVFPLpPPPPPLP	1.67063
		Nck 2nd SH3	Src homology 3 group	0.4068	0.000931563	PALLD_HUMAN (swissprot)	P823	PDVFPLPpPPPPLPS	1.67063
		Abl SH3	Src homology 3 group	0.4628	0.00901445	PALLD_HUMAN (swissprot)	P824	DVFPLPPpPPPLPSP	3.13242
		Itk SH3	Src homology 3 group	0.5962	0.00744987	PALLD_HUMAN (swissprot)	P824	DVFPLPPpPPPLPSP	3.13242
		Nck 2nd SH3	Src homology 3 group	0.5138	0.00779385	PALLD_HUMAN (swissprot)	P824	DVFPLPPpPPPLPSP	3.13242
		Cortactin SH3	Src homology 3 group	0.5514	0.00586711	PALLD_HUMAN (swissprot)	P826	FPLPPPPpPLPSPGQ	1.67063
		Crk SH3	Src homology 3 group	0.4487	0.00601554	PALLD_HUMAN (swissprot)	P826	FPLPPPPpPLPSPGQ	1.67063
		Grb2 SH3	Src homology 3 group	0.48	0.00886735	PALLD_HUMAN (swissprot)	P826	FPLPPPPpPLPSPGQ	1.67063
		Itk SH3	Src homology 3 group	0.6031	0.00865739	PALLD_HUMAN (swissprot)	P826	FPLPPPPpPLPSPGQ	1.67063
		Src SH3	Src homology 3 group	0.4012	0.00185264	PALLD_HUMAN (swissprot)	P826	FPLPPPPpPLPSPGQ	1.67063
		CDK1 motif 1 - [ST]Px[KR]x	Proline-dependent serine/threonine kinase group	0.3527	0.00441065	PALLD_HUMAN (swissprot)	S839	GQASHCSsPATRFGH	0.497357
		CDK1 motif 2 - [ST]PxxK	Proline-dependent serine/threonine kinase group	0.316	0.00150428	PALLD_HUMAN (swissprot)	S839	GQASHCSsPATRFGH	0.497357
		SHIP SH2	Src homology 2 group	0.3326	0.00161333	PALLD_HUMAN (swissprot)	Y990	ESGDEVQyGDVPVEN	0.566157
		Lck Kinase	Tyrosine kinase group	0.4666	0.00626207	PALLD_HUMAN (swissprot)	Y990	ESGDEVQyGDVPVEN	0.566157
		PDK1 Binding	Kinase binding site group	0.6004	0.00909229	PALLD_HUMAN (swissprot)	E1014	LKHYKIFeGMPVTFT	0.364808
		p85 SH2	Src homology 2 group	0.5191	0.00955447	PALLD_HUMAN (swissprot)	Y1073	TLDDDGNyTIMAANP	0.594115
		PLK1 Kinase	Acidophilic serine/threonine kinase group	0.3092	0.00536904	PALLD_HUMAN (swissprot)	T1074	LDDDGNYtIMAANPQ	0.606493
		CDK1 motif 2 - [ST]PxxK	Proline-dependent serine/threonine kinase group	0.4425	0.00979038	PALLD_HUMAN (swissprot)	S1101	AVNQRGRsPRSPSGH	2.41596
		Cdc2 Kinase	Proline-dependent serine/threonine kinase group	0.4676	0.00436378	PALLD_HUMAN (swissprot)	S1104	QRGRSPRsPSGHPHV	1.90733
		Cdk5 Kinase	Proline-dependent serine/threonine kinase group	0.4493	0.00621796	PALLD_HUMAN (swissprot)	S1104	QRGRSPRsPSGHPHV	1.90733
		Erk1 Kinase	Proline-dependent serine/threonine kinase group	0.5257	0.00965015	PALLD_HUMAN (swissprot)	S1104	QRGRSPRsPSGHPHV	1.90733
		Clk2 Kinase	Basophilic serine/threonine kinase	0.5111	0.00164915	PALLD_HUMAN (swissprot)	S1116	PHVRRPRsRSRDSGD	4.78158
		AMP_Kinase	Basophilic serine/threonine kinase	0.5761	0.00432656	PALLD_HUMAN (swissprot)	S1116	PHVRRPRsRSRDSGD	4.78158
		14-3-3 Mode 1	Phosphoserine/threonine binding group	0.4546	0.00968997	PALLD_HUMAN (swissprot)	S1116	PHVRRPRsRSRDSGD	4.78158
		Akt Kinase	Basophilic serine/threonine kinase	0.4993	0.00325064	PALLD_HUMAN (swissprot)	S1118	VRRPRSRsRDSGDEN	3.53334
		Clk2 Kinase	Basophilic serine/threonine kinase	0.3971	0.00059462	PALLD_HUMAN (swissprot)	S1118	VRRPRSRsRDSGDEN	3.53334
		GSK3 Kinase	Acidophilic serine/threonine kinase group	0.4759	0.00404757	PALLD_HUMAN (swissprot)	T1163	CKVSGLPtPDLSWQL	0.898128
		GSK3-improved	Acidophilic serine/threonine kinase group	0.4228	0.0043067	PALLD_HUMAN (swissprot)	T1163	CKVSGLPtPDLSWQL	0.898128
		Calmodulin dependent Kinase 2	Basophilic serine/threonine kinase	0.4133	0.0015838	PALLD_HUMAN (swissprot)	S1333	YTQWHQQsQSTKPKK	3.08514
Vinexin	O60504	Erk D-domain	Kinase binding site group	0.5765	0.00630132	VINEX_HUMAN (swissprot)	L12	PRSLRAGlSLDDFIP	0.348713
		ATM Kinase	DNA damage kinase group	0.4788	0.00503247	VINEX_HUMAN (swissprot)	S13	RSLRAGLsLDDFIPG	0.576444
		Cdc2 Kinase	Proline-dependent serine/threonine kinase group	0.4716	0.00468072	VINEX_HUMAN (swissprot)	T64	TVCNGGYtPRRDASQ	3.0421
		Cdk5 Kinase	Proline-dependent serine/threonine kinase group	0.4315	0.0048345	VINEX_HUMAN (swissprot)	T64	TVCNGGYtPRRDASQ	3.0421
		CDK1 motif 1 - [ST]Px[KR]x	Proline-dependent serine/threonine kinase group	0.3802	0.00553764	VINEX_HUMAN (swissprot)	T64	TVCNGGYtPRRDASQ	3.0421
		PIP3-binding PH	Lipid binding group	0.6749	0.00476269	VINEX_HUMAN (swissprot)	W146	SVDRPRDwYRRMFQQ	4.73753
		Amphiphysin SH3	Src homology 3 group	0.5123	0.00307982	VINEX_HUMAN (swissprot)	P170	LDWTFEEpPRDPRHL	5.3753
		Aurora A	Basophilic serine/threonine kinase	0.5331	0.00779322	VINEX_HUMAN (swissprot)	T208	SEELPRStFNYRPGA	1.96696
		GSK3 Kinase	Acidophilic serine/threonine kinase group	0.4386	0.00193716	VINEX_HUMAN (swissprot)	S299	AIETRLPsPKSSPAP	1.62291
		GSK3-improved	Acidophilic serine/threonine kinase group	0.3646	0.00133756	VINEX_HUMAN (swissprot)	S299	AIETRLPsPKSSPAP	1.62291
		GSK3 Kinase	Acidophilic serine/threonine kinase group	0.4071	0.000989245	VINEX_HUMAN (swissprot)	S303	RLPSPKSsPAPRRAP	1.98806
		Cdc2 Kinase	Proline-dependent serine/threonine kinase group	0.5114	0.00855457	VINEX_HUMAN (swissprot)	S303	RLPSPKSsPAPRRAP	1.98806
		Cdk5 Kinase	Proline-dependent serine/threonine kinase group	0.4827	0.00967784	VINEX_HUMAN (swissprot)	S303	RLPSPKSsPAPRRAP	1.98806
		CDK1 motif 2 - [ST]PxxK	Proline-dependent serine/threonine kinase group	0.4301	0.0083037	VINEX_HUMAN (swissprot)	S303	RLPSPKSsPAPRRAP	1.98806
		CDK1 motif 1 - [ST]Px[KR]x	Proline-dependent serine/threonine kinase group	0.2376	0.000943386	VINEX_HUMAN (swissprot)	S339	LGSARSLsPHKMADG	1.42816
		CDK1 motif 2 - [ST]PxxK	Proline-dependent serine/threonine kinase group	0.396	0.00509668	VINEX_HUMAN (swissprot)	S339	LGSARSLsPHKMADG	1.42816
		Erk1 Binding	Kinase binding site group	0.3312	0.00255495	VINEX_HUMAN (swissprot)	P359	GRRDFVYpSSTRDPS	1.06811
		Cdc2 Kinase	Proline-dependent serine/threonine kinase group	0.3886	0.00107491	VINEX_HUMAN (swissprot)	S373	SASNGGGsPARREEK	0.920215
		Cdk5 Kinase	Proline-dependent serine/threonine kinase group	0.34	0.00108242	VINEX_HUMAN (swissprot)	S373	SASNGGGsPARREEK	0.920215
		CDK1 motif 1 - [ST]Px[KR]x	Proline-dependent serine/threonine kinase group	0.2494	0.00117764	VINEX_HUMAN (swissprot)	S373	SASNGGGsPARREEK	0.920215
		CDK1 motif 2 - [ST]PxxK	Proline-dependent serine/threonine kinase group	0.3953	0.00504573	VINEX_HUMAN (swissprot)	S373	SASNGGGsPARREEK	0.920215
		PDK1 Binding	Kinase binding site group	0.5975	0.00876548	VINEX_HUMAN (swissprot)	D390	KAARLKFdFQAQSPK	1.00402
		PLCg N-terminal SH2	Src homology 2 group	0.3252	0.00368048	VINEX_HUMAN (swissprot)	Y433	LGIFPANyVEVLPAD	0.577952
		EGFR Kinase	Tyrosine kinase group	0.4124	0.00773612	VINEX_HUMAN (swissprot)	Y451	KPIKPPTyQVLEYGE	0.84943
		PDGFR Kin	Tyrosine kinase group	0.3953	0.00835076	VINEX_HUMAN (swissprot)	Y509	QGIFPASyVQVSREP	0.463789
		14-3-3 Mode 1	Phosphoserine/threonine binding group	0.3632	0.00328001	VINEX_HUMAN (swissprot)	S544	ARSARHPsSPSALRS	1.7944
		Cdc2 Kinase	Proline-dependent serine/threonine kinase group	0.4004	0.00132558	VINEX_HUMAN (swissprot)	S563	IDLGGQTsPRRTGFS	4.55315
		Cdk5 Kinase	Proline-dependent serine/threonine kinase group	0.4025	0.00299785	VINEX_HUMAN (swissprot)	S563	IDLGGQTsPRRTGFS	4.55315
		CDK1 motif 1 - [ST]Px[KR]x	Proline-dependent serine/threonine kinase group	0.3401	0.00398221	VINEX_HUMAN (swissprot)	S563	IDLGGQTsPRRTGFS	4.55315
		Akt Kinase	Basophilic serine/threonine kinase	0.5649	0.00834735	VINEX_HUMAN (swissprot)	S570	SPRRTGFsFPTQEPR	0.50854
		PDK1 Binding	Kinase binding site group	0.5763	0.00642478	VINEX_HUMAN (swissprot)	S570	SPRRTGFsFPTQEPR	0.50854
		Erk1 Binding	Kinase binding site group	0.1794	0.000671029	VINEX_HUMAN (swissprot)	P572	RRTGFSFpTQEPRPQ	1.77989
		ATM Kinase	DNA damage kinase group	0.516	0.00967978	VINEX_HUMAN (swissprot)	T573	RTGFSFPtQEPRPQT	2.05372
		DNA PK	DNA damage kinase group	0.4622	0.00380432	VINEX_HUMAN (swissprot)	T573	RTGFSFPtQEPRPQT	2.05372
		14-3-3 Mode 1	Phosphoserine/threonine binding group	0.4146	0.00609903	VINEX_HUMAN (swissprot)	S597	LSHSRGPsHPLDLGT	0.815443
		CDK1 motif 1 - [ST]Px[KR]x	Proline-dependent serine/threonine kinase group	0.4453	0.00964417	VINEX_HUMAN (swissprot)	S606	PLDLGTSsPNTSQIH	2.21351
		CDK1 motif 2 - [ST]PxxK	Proline-dependent serine/threonine kinase group	0.4138	0.00661325	VINEX_HUMAN (swissprot)	S606	PLDLGTSsPNTSQIH	2.21351
		Cdc2 Kinase	Proline-dependent serine/threonine kinase group	0.5232	0.00996285	VINEX_HUMAN (swissprot)	T615	NTSQIHWtPYRAMYQ	2.24555
		Cdk5 Kinase	Proline-dependent serine/threonine kinase group	0.4752	0.00872642	VINEX_HUMAN (swissprot)	T615	NTSQIHWtPYRAMYQ	2.24555
Ponsin	Q9BX66	Akt Kinase	Basophilic serine/threonine kinase	0.5289	0.0050304	SRBS1_HUMAN (swissprot)	S37	PLRARSIsAVKIIPV	0.432602
		Clk2 Kinase	Basophilic serine/threonine kinase	0.6688	0.00722069	SRBS1_HUMAN (swissprot)	S77	AVTLRASsSYRETPS	1.70996
		GSK3 Kinase	Acidophilic serine/threonine kinase group	0.4607	0.00297594	SRBS1_HUMAN (swissprot)	T82	ASSSYREtPSSSPAS	3.11531
		GSK3-improved	Acidophilic serine/threonine kinase group	0.3646	0.00133756	SRBS1_HUMAN (swissprot)	T82	ASSSYREtPSSSPAS	3.11531
		CDK1 motif 1 - [ST]Px[KR]x	Proline-dependent serine/threonine kinase group	0.4355	0.00883484	SRBS1_HUMAN (swissprot)	T82	ASSSYREtPSSSPAS	3.11531
		CDK1 motif 2 - [ST]PxxK	Proline-dependent serine/threonine kinase group	0.4034	0.00569687	SRBS1_HUMAN (swissprot)	T82	ASSSYREtPSSSPAS	3.11531
		GSK3 Kinase	Acidophilic serine/threonine kinase group	0.5186	0.00894876	SRBS1_HUMAN (swissprot)	S85	SYRETPSsSPASPQE	1.33221
		GSK3-improved	Acidophilic serine/threonine kinase group	0.4394	0.00589307	SRBS1_HUMAN (swissprot)	S85	SYRETPSsSPASPQE	1.33221
		CDK1 motif 1 - [ST]Px[KR]x	Proline-dependent serine/threonine kinase group	0.3991	0.00644469	SRBS1_HUMAN (swissprot)	S86	YRETPSSsPASPQET	1.15458
		CDK1 motif 2 - [ST]PxxK	Proline-dependent serine/threonine kinase group	0.365	0.00318566	SRBS1_HUMAN (swissprot)	S86	YRETPSSsPASPQET	1.15458
		GSK3-improved	Acidophilic serine/threonine kinase group	0.4689	0.00951473	SRBS1_HUMAN (swissprot)	S89	TPSSSPAsPQETRQH	2.22486
		Cdc2 Kinase	Proline-dependent serine/threonine kinase group	0.5191	0.00946579	SRBS1_HUMAN (swissprot)	S89	TPSSSPAsPQETRQH	2.22486
		Cdk5 Kinase	Proline-dependent serine/threonine kinase group	0.477	0.00895476	SRBS1_HUMAN (swissprot)	S89	TPSSSPAsPQETRQH	2.22486
		p85 SH3 mode2	Src homology 3 group	0.6072	0.00949671	SRBS1_HUMAN (swissprot)	P142	RSVHPNLpSDKSQDA	2.18418
		Erk1 Kinase	Proline-dependent serine/threonine kinase group	0.5001	0.00640683	SRBS1_HUMAN (swissprot)	T181	EGTARPPtPLGPLGC	0.99792
		Cortactin SH3	Src homology 3 group	0.568	0.00787625	SRBS1_HUMAN (swissprot)	P182	GTARPPTpLGPLGCV	0.99792
		ATM Kinase	DNA damage kinase group	0.5037	0.00792976	SRBS1_HUMAN (swissprot)	S235	SGSFAPIsQTPPSFS	1.28649
		Erk1 Kinase	Proline-dependent serine/threonine kinase group	0.498	0.00615818	SRBS1_HUMAN (swissprot)	T237	SFAPISQtPPSFSPP	2.45946
		Erk1 Kinase	Proline-dependent serine/threonine kinase group	0.3966	0.000819292	SRBS1_HUMAN (swissprot)	S242	SQTPPSFsPPPPLVP	1.31757
		Abl SH3	Src homology 3 group	0.3461	0.00126859	SRBS1_HUMAN (swissprot)	P244	TPPSFSPpPPLVPPA	1.44788
		Grb2 SH3	Src homology 3 group	0.4442	0.0041791	SRBS1_HUMAN (swissprot)	P246	PSFSPPPpLVPPAPE	0.8019
		Src SH3	Src homology 3 group	0.4685	0.00659173	SRBS1_HUMAN (swissprot)	P246	PSFSPPPpLVPPAPE	0.8019
		Cortactin SH3	Src homology 3 group	0.5255	0.00358116	SRBS1_HUMAN (swissprot)	P249	SPPPPLVpPAPEDLR	0.523908
		Intersectin SH3A	Src homology 3 group	0.61	0.0044101	SRBS1_HUMAN (swissprot)	P249	SPPPPLVpPAPEDLR	0.523908
		Protein Kinase A	Basophilic serine/threonine kinase	0.3766	0.00374767	SRBS1_HUMAN (swissprot)	S259	PEDLRRVsEPDLTGA	1.99654
		14-3-3 Mode 1	Phosphoserine/threonine binding group	0.3039	0.00135313	SRBS1_HUMAN (swissprot)	S259	PEDLRRVsEPDLTGA	1.99654
		Protein Kinase A	Basophilic serine/threonine kinase	0.4466	0.00788908	SRBS1_HUMAN (swissprot)	S325	REQQKRLsSLSDPVS	0.734677
		Aurora A	Basophilic serine/threonine kinase	0.4429	0.00249159	SRBS1_HUMAN (swissprot)	S325	REQQKRLsSLSDPVS	0.734677
		Aurora B	Basophilic serine/threonine kinase	0.4274	0.00145128	SRBS1_HUMAN (swissprot)	S325	REQQKRLsSLSDPVS	0.734677
		Akt Kinase	Basophilic serine/threonine kinase	0.5253	0.00475884	SRBS1_HUMAN (swissprot)	S326	EQQKRLSsLSDPVSE	0.626409
		Calmodulin dependent Kinase 2	Basophilic serine/threonine kinase	0.4654	0.00485922	SRBS1_HUMAN (swissprot)	S326	EQQKRLSsLSDPVSE	0.626409
		14-3-3 Mode 1	Phosphoserine/threonine binding group	0.443	0.00842587	SRBS1_HUMAN (swissprot)	S326	EQQKRLSsLSDPVSE	0.626409
		ATM Kinase	DNA damage kinase group	0.4769	0.00483976	SRBS1_HUMAN (swissprot)	T344	GEQDSAPtQEKPTSP	3.09883
		DNA PK	DNA damage kinase group	0.4041	0.00137946	SRBS1_HUMAN (swissprot)	T344	GEQDSAPtQEKPTSP	3.09883
		Cdc2 Kinase	Proline-dependent serine/threonine kinase group	0.4861	0.00591446	SRBS1_HUMAN (swissprot)	S350	PTQEKPTsPGKAIEK	2.0973
		Cdk5 Kinase	Proline-dependent serine/threonine kinase group	0.4419	0.00564281	SRBS1_HUMAN (swissprot)	S350	PTQEKPTsPGKAIEK	2.0973
		CDK1 motif 1 - [ST]Px[KR]x	Proline-dependent serine/threonine kinase group	0.3541	0.00446437	SRBS1_HUMAN (swissprot)	S350	PTQEKPTsPGKAIEK	2.0973
		Clk2 Kinase	Basophilic serine/threonine kinase	0.6941	0.00951222	SRBS1_HUMAN (swissprot)	S363	EKRAKDDsRRVVKST	2.43863
		AMP_Kinase	Basophilic serine/threonine kinase	0.5859	0.00517107	SRBS1_HUMAN (swissprot)	S369	DSRRVVKsTQDLSDV	1.90267
		PLK1 Kinase	Acidophilic serine/threonine kinase group	0.25	0.00133097	SRBS1_HUMAN (swissprot)	S377	TQDLSDVsMDEVGIP	1.08948
		PKC zeta	Basophilic serine/threonine kinase	0.4498	0.00485007	SRBS1_HUMAN (swissprot)	T397	RSKDWYKtMFKQIHK	1.77606
		PDGFR Kin	Tyrosine kinase group	0.3601	0.00403612	SRBS1_HUMAN (swissprot)	Y415	DTPEENPyFPTYKFP	1.79177
		Crk SH2	Src homology 2 group	0.3585	0.00149305	SRBS1_HUMAN (swissprot)	Y419	ENPYFPTyKFPELPE	2.14569
		Abl Kinase	Tyrosine kinase group	0.4124	0.00227497	SRBS1_HUMAN (swissprot)	Y419	ENPYFPTyKFPELPE	2.14569
		Erk1 Binding	Kinase binding site group	0.3373	0.00266663	SRBS1_HUMAN (swissprot)	P422	YFPTYKFpELPEIQQ	1.35518
		Erk1 Kinase	Proline-dependent serine/threonine kinase group	0.5092	0.00748428	SRBS1_HUMAN (swissprot)	T438	SEEDNPYtPTYQFPA	2.80194
		Abl SH2	Src homology 2 group	0.3543	0.00116964	SRBS1_HUMAN (swissprot)	Y441	DNPYTPTyQFPASTP	1.85813
		Crk SH2	Src homology 2 group	0.3467	0.00113169	SRBS1_HUMAN (swissprot)	Y441	DNPYTPTyQFPASTP	1.85813
		Abl Kinase	Tyrosine kinase group	0.3162	0.000231152	SRBS1_HUMAN (swissprot)	Y441	DNPYTPTyQFPASTP	1.85813
		EGFR Kinase	Tyrosine kinase group	0.3978	0.00544351	SRBS1_HUMAN (swissprot)	Y441	DNPYTPTyQFPASTP	1.85813
		Erk1 Binding	Kinase binding site group	0.2649	0.00154646	SRBS1_HUMAN (swissprot)	P444	YTPTYQFpASTPSPK	1.03827
		CDK1 motif 1 - [ST]Px[KR]x	Proline-dependent serine/threonine kinase group	0.4003	0.00650393	SRBS1_HUMAN (swissprot)	T447	TYQFPAStPSPKSED	1.43468
		CDK1 motif 2 - [ST]PxxK	Proline-dependent serine/threonine kinase group	0.2213	0.000330268	SRBS1_HUMAN (swissprot)	T447	TYQFPAStPSPKSED	1.43468
		CDK1 motif 2 - [ST]PxxK	Proline-dependent serine/threonine kinase group	0.4291	0.00819133	SRBS1_HUMAN (swissprot)	S449	QFPASTPsPKSEDDD	2.84009
		Casein Kinase 2	Acidophilic serine/threonine kinase group	0.4615	0.00672736	SRBS1_HUMAN (swissprot)	S452	ASTPSPKsEDDDSDL	4.58678
		Casein Kinase 2	Acidophilic serine/threonine kinase group	0.4289	0.00407807	SRBS1_HUMAN (swissprot)	S457	PKSEDDDsDLYSPRY	1.84822
		Itk Kinase	Tyrosine kinase group	0.4178	0.00705848	SRBS1_HUMAN (swissprot)	Y460	EDDDSDLySPRYSFS	2.0071
		Casein Kinase 1	Acidophilic serine/threonine kinase group	0.4169	0.00983629	SRBS1_HUMAN (swissprot)	S461	DDDSDLYsPRYSFSE	1.88321
		Aurora A	Basophilic serine/threonine kinase	0.5001	0.0051839	SRBS1_HUMAN (swissprot)	S465	DLYSPRYsFSEDTKS	1.89411
		PDK1 Binding	Kinase binding site group	0.5773	0.00653318	SRBS1_HUMAN (swissprot)	S465	DLYSPRYsFSEDTKS	1.89411
		GSK3 Kinase	Acidophilic serine/threonine kinase group	0.5173	0.00875995	SRBS1_HUMAN (swissprot)	S475	EDTKSPLsVPRSKSE	0.880308
		AMP_Kinase	Basophilic serine/threonine kinase	0.6055	0.00730533	SRBS1_HUMAN (swissprot)	S479	SPLSVPRsKSEMSYI	4.31693
		14-3-3 Mode 1	Phosphoserine/threonine binding group	0.4352	0.00774312	SRBS1_HUMAN (swissprot)	S481	LSVPRSKsEMSYIDG	1.89036
		PLK1 Kinase	Acidophilic serine/threonine kinase group	0.293	0.003834	SRBS1_HUMAN (swissprot)	S484	PRSKSEMsYIDGEKV	0.965437
		PKC epsilon	Basophilic serine/threonine kinase	0.3586	0.000988384	SRBS1_HUMAN (swissprot)	S484	PRSKSEMsYIDGEKV	0.965437
		Akt Kinase	Basophilic serine/threonine kinase	0.5471	0.00652304	SRBS1_HUMAN (swissprot)	T497	KVVKRSAtLPLPARS	0.47087
		14-3-3 Mode 1	Phosphoserine/threonine binding group	0.1843	0.00010685	SRBS1_HUMAN (swissprot)	T497	KVVKRSAtLPLPARS	0.47087
		Erk D-domain	Kinase binding site group	0.4462	0.000979375	SRBS1_HUMAN (swissprot)	L500	KRSATLPlPARSSSL	0.737352
		Cbl-Associated protein C-SH3	Src homology 3 group	0.6163	0.00263897	SRBS1_HUMAN (swissprot)	P501	RSATLPLpARSSSLK	1.1982
		AMP_Kinase	Basophilic serine/threonine kinase	0.6123	0.00819432	SRBS1_HUMAN (swissprot)	S505	LPLPARSsSLKSSSE	1.78159
		PKC alpha/beta/gamma	Basophilic serine/threonine kinase	0.4369	0.00718851	SRBS1_HUMAN (swissprot)	S506	PLPARSSsLKSSSER	1.21898
		PDK1 Binding	Kinase binding site group	0.554	0.00404219	SRBS1_HUMAN (swissprot)	E537	AEPKSIYeYQPGKSS	1.8291
		PDK1 Binding	Kinase binding site group	0.5331	0.00256229	SRBS1_HUMAN (swissprot)	E575	YKFFSELeFGKPPPK	0.97139
		GSK3 Kinase	Acidophilic serine/threonine kinase group	0.4441	0.00211479	SRBS1_HUMAN (swissprot)	S640	VPQSSAIsPTPEISS	0.75045
		Erk1 Kinase	Proline-dependent serine/threonine kinase group	0.4869	0.00484665	SRBS1_HUMAN (swissprot)	S640	VPQSSAIsPTPEISS	0.75045
		CDK1 motif 2 - [ST]PxxK	Proline-dependent serine/threonine kinase group	0.4437	0.00994374	SRBS1_HUMAN (swissprot)	S640	VPQSSAIsPTPEISS	0.75045
		Aurora A	Basophilic serine/threonine kinase	0.4787	0.00397726	SRBS1_HUMAN (swissprot)	S665	FHAVKREsDGAPGDL	1.73921
		Aurora B	Basophilic serine/threonine kinase	0.4457	0.00192905	SRBS1_HUMAN (swissprot)	S665	FHAVKREsDGAPGDL	1.73921
		Aurora B	Basophilic serine/threonine kinase	0.5563	0.00861037	SRBS1_HUMAN (swissprot)	S703	LSGLKRPsSSASTKD	1.68746
		AMP_Kinase	Basophilic serine/threonine kinase	0.5525	0.00279122	SRBS1_HUMAN (swissprot)	S704	SGLKRPSsSASTKDS	1.15458
		GSK3-improved	Acidophilic serine/threonine kinase group	0.404	0.00320435	SRBS1_HUMAN (swissprot)	S707	KRPSSSAsTKDSESP	2.00397
		Cdc2 Kinase	Proline-dependent serine/threonine kinase group	0.4725	0.00475203	SRBS1_HUMAN (swissprot)	S713	ASTKDSEsPRHFIPA	2.93729
		Cdk5 Kinase	Proline-dependent serine/threonine kinase group	0.4098	0.00333918	SRBS1_HUMAN (swissprot)	S713	ASTKDSEsPRHFIPA	2.93729
		PDK1 Binding	Kinase binding site group	0.5774	0.00654402	SRBS1_HUMAN (swissprot)	D721	PRHFIPAdYLESTEE	1.33785
		Protein Kinase A	Basophilic serine/threonine kinase	0.4252	0.00645901	SRBS1_HUMAN (swissprot)	T762	DIAARRHtGVIPTHH	0.453838
		Aurora A	Basophilic serine/threonine kinase	0.4495	0.00273379	SRBS1_HUMAN (swissprot)	T762	DIAARRHtGVIPTHH	0.453838
		Aurora B	Basophilic serine/threonine kinase	0.4358	0.00166185	SRBS1_HUMAN (swissprot)	T762	DIAARRHtGVIPTHH	0.453838
		Protein Kinase A	Basophilic serine/threonine kinase	0.4522	0.00832066	SRBS1_HUMAN (swissprot)	S791	DDTAKRKsGSEMRPA	2.76284
		Aurora B	Basophilic serine/threonine kinase	0.5543	0.00844418	SRBS1_HUMAN (swissprot)	S791	DDTAKRKsGSEMRPA	2.76284
		PLCg N-terminal SH2	Src homology 2 group	0.2774	0.00136087	SRBS1_HUMAN (swissprot)	Y846	VGIFPRTyIELLPPA	1.01617
		PKC epsilon	Basophilic serine/threonine kinase	0.4245	0.00668555	SRBS1_HUMAN (swissprot)	S887	GDTQVEMsFRKGERI	1.78522
		PDGFR Kin	Tyrosine kinase group	0.3892	0.00748293	SRBS1_HUMAN (swissprot)	Y922	QGIFPITyVDVIKRP	0.33419
		SHIP SH2	Src homology 2 group	0.4177	0.00958534	SRBS1_HUMAN (swissprot)	Y937	LVKNPVDyMDLPFSS	0.606597
		EGFR Kinase	Tyrosine kinase group	0.3816	0.00354023	SRBS1_HUMAN (swissprot)	Y937	LVKNPVDyMDLPFSS	0.606597
		CDK1 motif 1 - [ST]Px[KR]x	Proline-dependent serine/threonine kinase group	0.3184	0.00321989	SRBS1_HUMAN (swissprot)	S945	MDLPFSSsPSRSATA	2.23847
		GSK3 Kinase	Acidophilic serine/threonine kinase group	0.4961	0.00568089	SRBS1_HUMAN (swissprot)	S947	LPFSSSPsRSATASP	1.68746
		GSK3-improved	Acidophilic serine/threonine kinase group	0.3747	0.00177376	SRBS1_HUMAN (swissprot)	S947	LPFSSSPsRSATASP	1.68746
		Akt Kinase	Basophilic serine/threonine kinase	0.5666	0.0085495	SRBS1_HUMAN (swissprot)	T951	SSPSRSAtASPQFSS	0.937326
		14-3-3 Mode 1	Phosphoserine/threonine binding group	0.3105	0.00153787	SRBS1_HUMAN (swissprot)	T951	SSPSRSAtASPQFSS	0.937326
		GSK3-improved	Acidophilic serine/threonine kinase group	0.4143	0.0038083	SRBS1_HUMAN (swissprot)	T964	SSHSKLItPAPSSLP	0.461815
		CDK1 motif 2 - [ST]PxxK	Proline-dependent serine/threonine kinase group	0.4396	0.00941976	SRBS1_HUMAN (swissprot)	T964	SSHSKLItPAPSSLP	0.461815
		Aurora A	Basophilic serine/threonine kinase	0.5507	0.00972625	SRBS1_HUMAN (swissprot)	S1000	VGVPGRRsLALTPPL	0.809449
		GSK3 Kinase	Acidophilic serine/threonine kinase group	0.5127	0.00809185	SRBS1_HUMAN (swissprot)	T1004	GRRSLALtPPLPPLP	0.543312
		Erk1 Kinase	Proline-dependent serine/threonine kinase group	0.439	0.00195899	SRBS1_HUMAN (swissprot)	T1004	GRRSLALtPPLPPLP	0.543312
		p85 SH3 mode1	Src homology 3 group	0.5291	0.00342733	SRBS1_HUMAN (swissprot)	P1005	RRSLALTpPLPPLPE	0.8316
		Cortactin SH3	Src homology 3 group	0.5269	0.00366881	SRBS1_HUMAN (swissprot)	P1008	LALTPPLpPLPEASI	0.891
		Grb2 SH3	Src homology 3 group	0.385	0.00102992	SRBS1_HUMAN (swissprot)	P1008	LALTPPLpPLPEASI	0.891
		Intersectin SH3A	Src homology 3 group	0.6556	0.00841398	SRBS1_HUMAN (swissprot)	P1008	LALTPPLpPLPEASI	0.891
		Src SH3	Src homology 3 group	0.4566	0.00547751	SRBS1_HUMAN (swissprot)	P1008	LALTPPLpPLPEASI	0.891
		Cbl-Associated protein C-SH3	Src homology 3 group	0.7025	0.00798948	SRBS1_HUMAN (swissprot)	P1009	ALTPPLPpLPEASIY	0.99792
		GSK3 Kinase	Acidophilic serine/threonine kinase group	0.4205	0.00135259	SRBS1_HUMAN (swissprot)	S1028	LALSPRAsPSLSLSL	1.03844
		GSK3-improved	Acidophilic serine/threonine kinase group	0.3936	0.00259454	SRBS1_HUMAN (swissprot)	S1028	LALSPRAsPSLSLSL	1.03844
		Erk D-domain	Kinase binding site group	0.5538	0.00464534	SRBS1_HUMAN (swissprot)	L1033	RASPSLSlSLPHLSW	0.356928
		CDK1 motif 1 - [ST]Px[KR]x	Proline-dependent serine/threonine kinase group	0.3482	0.00425265	SRBS1_HUMAN (swissprot)	S1057	ASPLALPsPHKTYSL	1.64787
		CDK1 motif 1 - [ST]Px[KR]x	Proline-dependent serine/threonine kinase group	0.4491	0.00998667	SRBS1_HUMAN (swissprot)	T1082	NGDGGVHtPSSGIHQ	0.927567
		CDK1 motif 2 - [ST]PxxK	Proline-dependent serine/threonine kinase group	0.4178	0.00700521	SRBS1_HUMAN (swissprot)	T1082	NGDGGVHtPSSGIHQ	0.927567
		p85 SH3 mode2	Src homology 3 group	0.5711	0.00559873	SRBS1_HUMAN (swissprot)	P1143	GERGPGGpKISKKSC	0.651959
		Protein Kinase A	Basophilic serine/threonine kinase	0.3752	0.00368467	SRBS1_HUMAN (swissprot)	T1223	QAQQRRVtPDRSQTS	2.43168
		CDK1 motif 1 - [ST]Px[KR]x	Proline-dependent serine/threonine kinase group	0.3827	0.00565454	SRBS1_HUMAN (swissprot)	T1223	QAQQRRVtPDRSQTS	2.43168
		Calmodulin dependent Kinase 2	Basophilic serine/threonine kinase	0.4392	0.00280278	SRBS1_HUMAN (swissprot)	S1230	TPDRSQTsQDLFSYQ	1.83074
		ATM Kinase	DNA damage kinase group	0.4501	0.00286468	SRBS1_HUMAN (swissprot)	S1230	TPDRSQTsQDLFSYQ	1.83074
		DNA PK	DNA damage kinase group	0.4561	0.0034769	SRBS1_HUMAN (swissprot)	S1230	TPDRSQTsQDLFSYQ	1.83074
		PDK1 Binding	Kinase binding site group	0.5698	0.00572021	SRBS1_HUMAN (swissprot)	S1235	QTSQDLFsYQALYSY	0.601207
		Shc SH2	Src homology 2 group	0.452	0.00676576	SRBS1_HUMAN (swissprot)	Y1240	LFSYQALySYIPQND	0.44034
		PDK1 Binding	Kinase binding site group	0.59	0.00792028	SRBS1_HUMAN (swissprot)	S1241	FSYQALYsYIPQNDD	0.67399
ASAP1	Q9ULH1	Aurora A	Basophilic serine/threonine kinase	0.4929	0.00473308	ASAP1_HUMAN (swissprot)	S9	RSSASRLsSFSSRDS	0.771411
		Aurora B	Basophilic serine/threonine kinase	0.5526	0.00830291	ASAP1_HUMAN (swissprot)	S9	RSSASRLsSFSSRDS	0.771411
		Akt Kinase	Basophilic serine/threonine kinase	0.4513	0.0015272	ASAP1_HUMAN (swissprot)	S10	SSASRLSsFSSRDSL	0.527807
		Calmodulin dependent Kinase 2	Basophilic serine/threonine kinase	0.489	0.00776978	ASAP1_HUMAN (swissprot)	S10	SSASRLSsFSSRDSL	0.527807
		Clk2 Kinase	Basophilic serine/threonine kinase	0.6581	0.00646249	ASAP1_HUMAN (swissprot)	S10	SSASRLSsFSSRDSL	0.527807
		AMP_Kinase	Basophilic serine/threonine kinase	0.6112	0.00805051	ASAP1_HUMAN (swissprot)	S13	SRLSSFSsRDSLWNR	1.56211
		Aurora A	Basophilic serine/threonine kinase	0.5067	0.00560859	ASAP1_HUMAN (swissprot)	S16	SSFSSRDsLWNRMPD	1.45462
		Crk SH2	Src homology 2 group	0.4313	0.00680567	ASAP1_HUMAN (swissprot)	Y38	IAETTEDyNSPTTSS	3.59377
		Itk SH2	Src homology 2 group	0.4714	0.00787348	ASAP1_HUMAN (swissprot)	Y38	IAETTEDyNSPTTSS	3.59377
		Nck SH2	Src homology 2 group	0.4199	0.00361108	ASAP1_HUMAN (swissprot)	Y38	IAETTEDyNSPTTSS	3.59377
		PDK1 Binding	Kinase binding site group	0.5866	0.00754126	ASAP1_HUMAN (swissprot)	S122	GTAFVKFsTLTKELS	0.913489
		DNA PK	DNA damage kinase group	0.5097	0.00843546	ASAP1_HUMAN (swissprot)	T278	DLYNIKQtQDEEKKQ	5.73727
		Protein Kinase A	Basophilic serine/threonine kinase	0.4132	0.00574271	ASAP1_HUMAN (swissprot)	S348	VWQRRKCsVKNGILT	0.816076
		PLK1 Kinase	Acidophilic serine/threonine kinase group	0.2729	0.00245199	ASAP1_HUMAN (swissprot)	T393	DLISHNRtYHFQAED	1.99722
		Calmodulin dependent Kinase 2	Basophilic serine/threonine kinase	0.4981	0.0090304	ASAP1_HUMAN (swissprot)	S493	VHISRIQsLELDKLG	0.43912
		Erk1 Kinase	Proline-dependent serine/threonine kinase group	0.4888	0.00506889	ASAP1_HUMAN (swissprot)	S525	IMEANLPsPSPKPTP	1.25483
		CDK1 motif 2 - [ST]PxxK	Proline-dependent serine/threonine kinase group	0.3047	0.00128593	ASAP1_HUMAN (swissprot)	S525	IMEANLPsPSPKPTP	1.25483
		GSK3 Kinase	Acidophilic serine/threonine kinase group	0.4097	0.00102791	ASAP1_HUMAN (swissprot)	S527	EANLPSPsPKPTPSS	3.04295
		GSK3-improved	Acidophilic serine/threonine kinase group	0.4004	0.00299326	ASAP1_HUMAN (swissprot)	S527	EANLPSPsPKPTPSS	3.04295
		Erk1 Kinase	Proline-dependent serine/threonine kinase group	0.492	0.00544778	ASAP1_HUMAN (swissprot)	S527	EANLPSPsPKPTPSS	3.04295
		GSK3 Kinase	Acidophilic serine/threonine kinase group	0.4979	0.00594232	ASAP1_HUMAN (swissprot)	T531	PSPSPKPtPSSDMTV	2.84009
		Erk D-domain	Kinase binding site group	0.5991	0.00850371	ASAP1_HUMAN (swissprot)	L655	SKPECLKlLLRSKPT	0.415191
		Casein Kinase 2	Acidophilic serine/threonine kinase group	0.3067	0.000577527	ASAP1_HUMAN (swissprot)	S717	RQEEIDEsDDDLDDK	4.13662
		ATM Kinase	DNA damage kinase group	0.4658	0.00393304	ASAP1_HUMAN (swissprot)	S717	RQEEIDEsDDDLDDK	4.13662
		Cdc2 Kinase	Proline-dependent serine/threonine kinase group	0.4572	0.00360909	ASAP1_HUMAN (swissprot)	S726	DDLDDKPsPIKKERS	2.0586
		Cdk5 Kinase	Proline-dependent serine/threonine kinase group	0.3877	0.00233085	ASAP1_HUMAN (swissprot)	S726	DDLDDKPsPIKKERS	2.0586
		CDK1 motif 1 - [ST]Px[KR]x	Proline-dependent serine/threonine kinase group	0.3847	0.00574806	ASAP1_HUMAN (swissprot)	S726	DDLDDKPsPIKKERS	2.0586
		CDK1 motif 2 - [ST]PxxK	Proline-dependent serine/threonine kinase group	0.4066	0.0059659	ASAP1_HUMAN (swissprot)	S726	DDLDDKPsPIKKERS	2.0586
		GSK3-improved	Acidophilic serine/threonine kinase group	0.4612	0.00838228	ASAP1_HUMAN (swissprot)	S742	RPQSFCHsSSISPQD	0.282
		CDK1 motif 2 - [ST]PxxK	Proline-dependent serine/threonine kinase group	0.4103	0.00627697	ASAP1_HUMAN (swissprot)	S746	FCHSSSIsPQDKLAL	1.29016
		Cdc2 Kinase	Proline-dependent serine/threonine kinase group	0.4912	0.00640423	ASAP1_HUMAN (swissprot)	T758	LALPGFStPRDKQRL	1.94108
		Cdk5 Kinase	Proline-dependent serine/threonine kinase group	0.453	0.00651813	ASAP1_HUMAN (swissprot)	T758	LALPGFStPRDKQRL	1.94108
		Aurora A	Basophilic serine/threonine kinase	0.4428	0.00248792	ASAP1_HUMAN (swissprot)	S766	PRDKQRLsYGAFTNQ	0.777071
		Aurora B	Basophilic serine/threonine kinase	0.4515	0.00213076	ASAP1_HUMAN (swissprot)	S766	PRDKQRLsYGAFTNQ	0.777071
		CDK1 motif 1 - [ST]Px[KR]x	Proline-dependent serine/threonine kinase group	0.3047	0.00275304	ASAP1_HUMAN (swissprot)	S782	FVSTSTDsPTSPTTE	2.21351
		CDK1 motif 2 - [ST]PxxK	Proline-dependent serine/threonine kinase group	0.2652	0.0006991	ASAP1_HUMAN (swissprot)	S782	FVSTSTDsPTSPTTE	2.21351
		GSK3-improved	Acidophilic serine/threonine kinase group	0.4094	0.00352098	ASAP1_HUMAN (swissprot)	T784	STSTDSPtSPTTEAP	2.04955
		Erk1 Kinase	Proline-dependent serine/threonine kinase group	0.5065	0.0071646	ASAP1_HUMAN (swissprot)	S785	TSTDSPTsPTTEAPP	2.2072
		CDK1 motif 2 - [ST]PxxK	Proline-dependent serine/threonine kinase group	0.4223	0.00744616	ASAP1_HUMAN (swissprot)	S785	TSTDSPTsPTTEAPP	2.2072
		Crk SH3	Src homology 3 group	0.4392	0.00527119	ASAP1_HUMAN (swissprot)	P791	TSPTTEApPLPPRNA	1.22245
		Abl SH3	Src homology 3 group	0.3889	0.00278353	ASAP1_HUMAN (swissprot)	P792	SPTTEAPpLPPRNAG	1.09147
		Nck 2nd SH3	Src homology 3 group	0.4248	0.00142699	ASAP1_HUMAN (swissprot)	P792	SPTTEAPpLPPRNAG	1.09147
		Cbl-Associated protein C-SH3	Src homology 3 group	0.6097	0.00241472	ASAP1_HUMAN (swissprot)	P794	TTEAPPLpPRNAGKG	2.28541
		Cortactin SH3	Src homology 3 group	0.5615	0.00708954	ASAP1_HUMAN (swissprot)	P794	TTEAPPLpPRNAGKG	2.28541
		Intersectin SH3A	Src homology 3 group	0.3002	7.67199e-05	ASAP1_HUMAN (swissprot)	P794	TTEAPPLpPRNAGKG	2.28541
		p85 SH3 mode2	Src homology 3 group	0.5012	0.00178383	ASAP1_HUMAN (swissprot)	P794	TTEAPPLpPRNAGKG	2.28541
		GSK3 Kinase	Acidophilic serine/threonine kinase group	0.5255	0.00995091	ASAP1_HUMAN (swissprot)	T808	GPTGPPStLPLSTQT	0.72072
		GSK3-improved	Acidophilic serine/threonine kinase group	0.4684	0.00944119	ASAP1_HUMAN (swissprot)	S817	PLSTQTSsGSSTLSK	1.05561
		Itk SH3	Src homology 3 group	0.524	0.00172523	ASAP1_HUMAN (swissprot)	P827	STLSKKRpPPPPPGH	5.1316
		Amphiphysin SH3	Src homology 3 group	0.551	0.00692974	ASAP1_HUMAN (swissprot)	P828	TLSKKRPpPPPPGHK	3.96773
		Itk SH3	Src homology 3 group	0.5745	0.00515136	ASAP1_HUMAN (swissprot)	P828	TLSKKRPpPPPPGHK	3.96773
		Itk SH3	Src homology 3 group	0.5677	0.00443109	ASAP1_HUMAN (swissprot)	P829	LSKKRPPpPPPGHKR	3.13242
		p85 SH3 mode1	Src homology 3 group	0.5283	0.00338039	ASAP1_HUMAN (swissprot)	P829	LSKKRPPpPPPGHKR	3.13242
		Src SH3	Src homology 3 group	0.3233	0.000370653	ASAP1_HUMAN (swissprot)	P829	LSKKRPPpPPPGHKR	3.13242
		Intersectin SH3A	Src homology 3 group	0.655	0.0083569	ASAP1_HUMAN (swissprot)	P830	SKKRPPPpPPGHKRT	2.00475
		Intersectin SH3A	Src homology 3 group	0.6495	0.00783366	ASAP1_HUMAN (swissprot)	P831	KKRPPPPpPGHKRTL	1.76418
		Cbl-Associated protein C-SH3	Src homology 3 group	0.662	0.00458105	ASAP1_HUMAN (swissprot)	P832	KRPPPPPpGHKRTLS	2.28167
		PLCg SH3	Src homology 3 group	0.4632	0.00158436	ASAP1_HUMAN (swissprot)	P832	KRPPPPPpGHKRTLS	2.28167
		Protein Kinase A	Basophilic serine/threonine kinase	0.4474	0.00795073	ASAP1_HUMAN (swissprot)	T837	PPPGHKRtLSDPPSP	2.39092
		Akt Kinase	Basophilic serine/threonine kinase	0.5531	0.00711194	ASAP1_HUMAN (swissprot)	S839	PGHKRTLsDPPSPLP	1.45946
		14-3-3 Mode 1	Phosphoserine/threonine binding group	0.4117	0.0058819	ASAP1_HUMAN (swissprot)	S839	PGHKRTLsDPPSPLP	1.45946
		Cdc2 Kinase	Proline-dependent serine/threonine kinase group	0.5032	0.00758418	ASAP1_HUMAN (swissprot)	S843	RTLSDPPsPLPHGPP	1.44788
		Erk1 Kinase	Proline-dependent serine/threonine kinase group	0.4341	0.00180359	ASAP1_HUMAN (swissprot)	S843	RTLSDPPsPLPHGPP	1.44788
		Grb2 SH3	Src homology 3 group	0.4089	0.00172794	ASAP1_HUMAN (swissprot)	P846	SDPPSPLpHGPPNKG	0.940896
		Src SH3	Src homology 3 group	0.4716	0.00695944	ASAP1_HUMAN (swissprot)	P846	SDPPSPLpHGPPNKG	0.940896
		PKC epsilon	Basophilic serine/threonine kinase	0.4208	0.006115	ASAP1_HUMAN (swissprot)	T870	PSSSSKTtNKFEGLS	2.76049
		ATM Kinase	DNA damage kinase group	0.5031	0.00784558	ASAP1_HUMAN (swissprot)	S877	TNKFEGLsQQSSTSS	1.00739
		p85 SH3 mode1	Src homology 3 group	0.5052	0.00229159	ASAP1_HUMAN (swissprot)	P895	ALGPRVLpKLPQKVA	0.553133
		Src SH3	Src homology 3 group	0.3564	0.000725587	ASAP1_HUMAN (swissprot)	P895	ALGPRVLpKLPQKVA	0.553133
		p85 SH3 mode2	Src homology 3 group	0.4925	0.00151754	ASAP1_HUMAN (swissprot)	P898	PRVLPKLpQKVALRK	1.50231
		p85 SH3 mode1	Src homology 3 group	0.5936	0.00947568	ASAP1_HUMAN (swissprot)	P931	SSQLAELpQKPPPGD	2.71035
		Cortactin SH3	Src homology 3 group	0.4979	0.0018745	ASAP1_HUMAN (swissprot)	P940	KPPPGDLpPKPTELA	2.33353
		Erk D-domain	Kinase binding site group	0.5177	0.00275502	ASAP1_HUMAN (swissprot)	L955	PKPQIGDlPPKPGEL	1.49346
		Cortactin SH3	Src homology 3 group	0.4878	0.0016095	ASAP1_HUMAN (swissprot)	P956	KPQIGDLpPKPGELP	2.33353
		Nck 2nd SH3	Src homology 3 group	0.4169	0.00121359	ASAP1_HUMAN (swissprot)	P957	PQIGDLPpKPGELPP	1.38283
		p85 SH3 mode1	Src homology 3 group	0.5572	0.00537	ASAP1_HUMAN (swissprot)	P963	PPKPGELpPKPQLGD	2.41996
		Erk D-domain	Kinase binding site group	0.4997	0.00213096	ASAP1_HUMAN (swissprot)	L971	PKPQLGDlPPKPQLS	1.49346
		Cortactin SH3	Src homology 3 group	0.5754	0.00877189	ASAP1_HUMAN (swissprot)	P972	KPQLGDLpPKPQLSD	2.33353
		p85 SH3 mode1	Src homology 3 group	0.5238	0.00316829	ASAP1_HUMAN (swissprot)	P972	KPQLGDLpPKPQLSD	2.33353
		Nck 2nd SH3	Src homology 3 group	0.516	0.00802729	ASAP1_HUMAN (swissprot)	P973	PQLGDLPpKPQLSDL	2.41996
		Erk D-domain	Kinase binding site group	0.5793	0.00657351	ASAP1_HUMAN (swissprot)	L980	PKPQLSDlPPKPQMK	2.02239
		Cortactin SH3	Src homology 3 group	0.5754	0.00877189	ASAP1_HUMAN (swissprot)	P981	KPQLSDLpPKPQMKD	2.33353
		p85 SH3 mode1	Src homology 3 group	0.5699	0.00658435	ASAP1_HUMAN (swissprot)	P981	KPQLSDLpPKPQMKD	2.33353
		Nck 2nd SH3	Src homology 3 group	0.516	0.00802729	ASAP1_HUMAN (swissprot)	P982	PQLSDLPpKPQMKDL	2.41996
		Erk D-domain	Kinase binding site group	0.5973	0.00832333	ASAP1_HUMAN (swissprot)	L989	PKPQMKDlPPKPQLG	3.01803
		Cortactin SH3	Src homology 3 group	0.5754	0.00877189	ASAP1_HUMAN (swissprot)	P990	KPQMKDLpPKPQLGD	2.33353
		p85 SH3 mode1	Src homology 3 group	0.4526	0.000805745	ASAP1_HUMAN (swissprot)	P990	KPQMKDLpPKPQLGD	2.33353
		Src SH3	Src homology 3 group	0.4968	0.00994857	ASAP1_HUMAN (swissprot)	P990	KPQMKDLpPKPQLGD	2.33353
		Nck 2nd SH3	Src homology 3 group	0.516	0.00802729	ASAP1_HUMAN (swissprot)	P991	PQMKDLPpKPQLGDL	2.41996
		Cortactin SH3	Src homology 3 group	0.5823	0.00967641	ASAP1_HUMAN (swissprot)	P1052	NDLTPTLpETPVPLP	1.62994
		Erk1 Kinase	Proline-dependent serine/threonine kinase group	0.4374	0.00190825	ASAP1_HUMAN (swissprot)	T1054	LTPTLPEtPVPLPRK	1.57172
Syntenin	O00560	PLK1 Kinase	Acidophilic serine/threonine kinase group	0.2784	0.00275775	SDCB1_HUMAN (swissprot)	T198	RDRPFERtITMHKDS	1.12313
		Akt Kinase	Basophilic serine/threonine kinase	0.569	0.00883488	SDCB1_HUMAN (swissprot)	T200	RPFERTItMHKDSTG	0.901041
p21-activated kinase (PAK)	Q13153	Amphiphysin SH3	Src homology 3 group	0.5243	0.0040781	PAK1_HUMAN (swissprot)	P13	LDIQDKPpAPPMRNT	2.64683
		Itk SH3	Src homology 3 group	0.4989	0.000977833	PAK1_HUMAN (swissprot)	P13	LDIQDKPpAPPMRNT	2.64683
		Nck 2nd SH3	Src homology 3 group	0.1136	2.48763e-06	PAK1_HUMAN (swissprot)	P13	LDIQDKPpAPPMRNT	2.64683
		Intersectin SH3A	Src homology 3 group	0.6673	0.00953097	PAK1_HUMAN (swissprot)	P15	IQDKPPApPMRNTST	1.65904
		Cbl-Associated protein C-SH3	Src homology 3 group	0.4002	0.000121979	PAK1_HUMAN (swissprot)	P16	QDKPPAPpMRNTSTM	1.79177
		Intersectin SH3A	Src homology 3 group	0.6338	0.00638757	PAK1_HUMAN (swissprot)	P16	QDKPPAPpMRNTSTM	1.79177
		p85 SH3 mode2	Src homology 3 group	0.5553	0.00442434	PAK1_HUMAN (swissprot)	P16	QDKPPAPpMRNTSTM	1.79177
		AMP_Kinase	Basophilic serine/threonine kinase	0.543	0.00229229	PAK1_HUMAN (swissprot)	T22	PPMRNTStMIGAGSK	0.43912
		Cortactin SH3	Src homology 3 group	0.5726	0.008433	PAK1_HUMAN (swissprot)	P42	NHGSKPLpPNPEEKK	1.80428
		Grb2 SH3	Src homology 3 group	0.4155	0.00218623	PAK1_HUMAN (swissprot)	P42	NHGSKPLpPNPEEKK	1.80428
		p85 SH3 mode1	Src homology 3 group	0.5909	0.00911822	PAK1_HUMAN (swissprot)	P42	NHGSKPLpPNPEEKK	1.80428
		Src SH3	Src homology 3 group	0.4785	0.00777789	PAK1_HUMAN (swissprot)	P42	NHGSKPLpPNPEEKK	1.80428
		PLK1 Kinase	Acidophilic serine/threonine kinase group	0.2215	0.000535429	PAK1_HUMAN (swissprot)	T84	LPSDFEHtIHVGFDA	0.551772
		Calmodulin dependent Kinase 2	Basophilic serine/threonine kinase	0.4523	0.00370645	PAK1_HUMAN (swissprot)	S144	SNSQKYMsFTDKSAE	0.993833
		PKC epsilon	Basophilic serine/threonine kinase	0.4245	0.00668555	PAK1_HUMAN (swissprot)	S144	SNSQKYMsFTDKSAE	0.993833
		PDK1 Binding	Kinase binding site group	0.5201	0.00173783	PAK1_HUMAN (swissprot)	T146	SQKYMSFtDKSAEDY	1.71768
		Casein Kinase 1	Acidophilic serine/threonine kinase group	0.4017	0.00670009	PAK1_HUMAN (swissprot)	S149	YMSFTDKsAEDYNSS	2.9967
		Intersectin SH3A	Src homology 3 group	0.5855	0.00305987	PAK1_HUMAN (swissprot)	P171	VSETPAVpPVSEDED	0.408648
		Casein Kinase 2	Acidophilic serine/threonine kinase group	0.4426	0.0049818	PAK1_HUMAN (swissprot)	S174	TPAVPPVsEDEDDDD	1.76536
		Casein Kinase 1	Acidophilic serine/threonine kinase group	0.3849	0.00451066	PAK1_HUMAN (swissprot)	T185	DDDDDDAtPPPVIAP	2.06289
		Itk SH3	Src homology 3 group	0.603	0.00863553	PAK1_HUMAN (swissprot)	P188	DDDATPPpVIAPRPE	0.445322
		PLCg SH3	Src homology 3 group	0.4457	0.00115481	PAK1_HUMAN (swissprot)	P192	TPPPVIApRPEHTKS	1.31617
		Casein Kinase 1	Acidophilic serine/threonine kinase group	0.3973	0.0060633	PAK1_HUMAN (swissprot)	S204	TKSVYTRsVIEPLPV	0.782183
		Src SH3	Src homology 3 group	0.3794	0.0011716	PAK1_HUMAN (swissprot)	P210	RSVIEPLpVTPTRDV	0.74844
		CDK1 motif 1 - [ST]Px[KR]x	Proline-dependent serine/threonine kinase group	0.3754	0.00532169	PAK1_HUMAN (swissprot)	T212	VIEPLPVtPTRDVAT	1.65904
		Cbl-Associated protein C-SH3	Src homology 3 group	0.6789	0.00582384	PAK1_HUMAN (swissprot)	P213	IEPLPVTpTRDVATS	1.79177
		PDK1 Binding	Kinase binding site group	0.5975	0.00876548	PAK1_HUMAN (swissprot)	E274	KKKYTRFeKIGQGAS	0.933806
		p85 SH2	Src homology 2 group	0.4887	0.00732811	PAK1_HUMAN (swissprot)	Y285	QGASGTVyTAMDVAT	0.554961
		Protein Kinase A	Basophilic serine/threonine kinase	0.369	0.00340565	PAK1_HUMAN (swissprot)	T423	PEQSKRStMVGTPYW	0.631005
		Aurora A	Basophilic serine/threonine kinase	0.425	0.00193165	PAK1_HUMAN (swissprot)	T423	PEQSKRStMVGTPYW	0.631005
		Aurora B	Basophilic serine/threonine kinase	0.5346	0.00687111	PAK1_HUMAN (swissprot)	T423	PEQSKRStMVGTPYW	0.631005
		Erk D-domain	Kinase binding site group	0.5665	0.00548933	PAK1_HUMAN (swissprot)	V445	RKAYGPKvDIWSLGI	0.647414
		Grb2 SH2	Src homology 2 group	0.5	0.00658274	PAK1_HUMAN (swissprot)	Y464	MIEGEPPyLNENPLR	2.04773
Protein Kinase AKT	P31749	PIP3-binding PH	Lipid binding group	0.0944	1.3998e-05	AKT1_HUMAN (swissprot)	W22	RGEYIKTwRPRYFLL	4.12535
		PKC zeta	Basophilic serine/threonine kinase	0.4454	0.00444031	AKT1_HUMAN (swissprot)	T34	FLLKNDGtFIGYKER	0.328327
		Akt Kinase	Basophilic serine/threonine kinase	0.4705	0.00208196	AKT1_HUMAN (swissprot)	T72	TERPRPNtFIIRCLQ	0.363383
		PKC epsilon	Basophilic serine/threonine kinase	0.4311	0.0077033	AKT1_HUMAN (swissprot)	T87	WTTVIERtFHVETPE	0.981091
		Protein Kinase A	Basophilic serine/threonine kinase	0.4412	0.00751535	AKT1_HUMAN (swissprot)	T146	AKPKHRVtMNEFEYL	1.37608
		PKC epsilon	Basophilic serine/threonine kinase	0.3919	0.00273075	AKT1_HUMAN (swissprot)	T146	AKPKHRVtMNEFEYL	1.37608
		PKC mu	Basophilic serine/threonine kinase	0.4218	0.00562849	AKT1_HUMAN (swissprot)	T160	LKLLGKGtFGKVILV	1.12172
		Akt Kinase	Basophilic serine/threonine kinase	0.5015	0.00335012	AKT1_HUMAN (swissprot)	S246	LSRERVFsEDRARFY	1.11806
		Clk2 Kinase	Basophilic serine/threonine kinase	0.6187	0.00431871	AKT1_HUMAN (swissprot)	S246	LSRERVFsEDRARFY	1.11806
		SHIP SH2	Src homology 2 group	0.3454	0.00208999	AKT1_HUMAN (swissprot)	Y272	HSEKNVVyRDLKLEN	0.53358
		Erk1 Kinase	Proline-dependent serine/threonine kinase group	0.4739	0.00391169	AKT1_HUMAN (swissprot)	S422	HVYEKKLsPPFKPQV	1.04865
		Calmodulin dependent Kinase 2	Basophilic serine/threonine kinase	0.4907	0.00800528	AKT1_HUMAN (swissprot)	S473	RPHFPQFsYSASGTA	0.976962
		PDK1 Binding	Kinase binding site group	0.1246	6.98237e-05	AKT1_HUMAN (swissprot)	S473	RPHFPQFsYSASGTA	0.976962
Phosphatidyl inositol 3-kinase (PI3K)	P42336	EGFR Kinase	Tyrosine kinase group	0.3732	0.00291578	PK3CA_HUMAN (swissprot)	Y68	LLQDESSyIFVSVTQ	0.290525
		ATM Kinase	DNA damage kinase group	0.4814	0.00529618	PK3CA_HUMAN (swissprot)	T74	SYIFVSVtQEAEREE	0.996738
		DNA PK	DNA damage kinase group	0.4906	0.00626645	PK3CA_HUMAN (swissprot)	T74	SYIFVSVtQEAEREE	0.996738
		PLCg C-terminal SH2	Src homology 2 group	0.3975	0.00458204	PK3CA_HUMAN (swissprot)	Y165	SPHSRAMyVYPPNVE	0.645566
		Erk1 Binding	Kinase binding site group	0.4914	0.00481885	PK3CA_HUMAN (swissprot)	P168	SRAMYVYpPNVESSP	0.789839
		Protein Kinase A	Basophilic serine/threonine kinase	0.4222	0.00627994	PK3CA_HUMAN (swissprot)	T229	AEAIRKKtRSMLLSS	3.43584
		Akt Kinase	Basophilic serine/threonine kinase	0.5532	0.00712176	PK3CA_HUMAN (swissprot)	S231	AIRKKTRsMLLSSEQ	0.584264
		Protein Kinase A	Basophilic serine/threonine kinase	0.448	0.00799698	PK3CA_HUMAN (swissprot)	S312	PSYSRRIsTATPYMN	0.887198
		Aurora A	Basophilic serine/threonine kinase	0.489	0.00452131	PK3CA_HUMAN (swissprot)	S312	PSYSRRIsTATPYMN	0.887198
		Aurora B	Basophilic serine/threonine kinase	0.4748	0.00305566	PK3CA_HUMAN (swissprot)	S312	PSYSRRIsTATPYMN	0.887198
		Grb2 SH2	Src homology 2 group	0.4892	0.00546481	PK3CA_HUMAN (swissprot)	Y343	IKILCATyVNVNIRD	0.481627
		Erk D-domain	Kinase binding site group	0.5149	0.00265305	PK3CA_HUMAN (swissprot)	L404	PRAARLClSICSVKG	0.0420699
		PKC alpha/beta/gamma	Basophilic serine/threonine kinase	0.4242	0.00532585	PK3CA_HUMAN (swissprot)	S408	RLCLSICsVKGRKGA	0.169509
		PDK1 Binding	Kinase binding site group	0.5747	0.00625135	PK3CA_HUMAN (swissprot)	D431	WGNINLFdYTDTLVS	1.03206
		ATM Kinase	DNA damage kinase group	0.4155	0.00141318	PK3CA_HUMAN (swissprot)	T624	RCLEKYLtDDKLSQY	2.38356
		ATM Kinase	DNA damage kinase group	0.3861	0.000705757	PK3CA_HUMAN (swissprot)	T957	ERVPFVLtQDFLIVI	0.506975
Fyn	P06241	14-3-3 Mode 1	Phosphoserine/threonine binding group	0.3831	0.00418536	FYN_HUMAN (swissprot)	T32	SSGYRYGtDPTPQHY	1.91122
		Cdc2 Kinase	Proline-dependent serine/threonine kinase group	0.4685	0.00443509	FYN_HUMAN (swissprot)	T35	YRYGTDPtPQHYPSF	3.11201
		Cdk5 Kinase	Proline-dependent serine/threonine kinase group	0.426	0.00445095	FYN_HUMAN (swissprot)	T35	YRYGTDPtPQHYPSF	3.11201
		PKC alpha/beta/gamma	Basophilic serine/threonine kinase	0.3627	0.0013378	FYN_HUMAN (swissprot)	T75	NSSSHTGtLRTRGGT	1.10111
		Akt Kinase	Basophilic serine/threonine kinase	0.5485	0.00666045	FYN_HUMAN (swissprot)	T82	TLRTRGGtGVTLFVA	0.343348
		Erk D-domain	Kinase binding site group	0.6101	0.00992394	FYN_HUMAN (swissprot)	V84	RTRGGTGvTLFVALY	0.250358
		Erk D-domain	Kinase binding site group	0.602	0.00887814	FYN_HUMAN (swissprot)	L86	RGGTGVTlFVALYDY	0.131438
		14-3-3 Mode 1	Phosphoserine/threonine binding group	0.4265	0.00698999	FYN_HUMAN (swissprot)	T126	WWEARSLtTGETGYI	0.904071
		Shc PTB	Phosphotyrosine binding group	0.5136	0.00449829	FYN_HUMAN (swissprot)	Y213	RKLDNGGyYITTRAQ	0.557441
		Aurora B	Basophilic serine/threonine kinase	0.5671	0.00951237	FYN_HUMAN (swissprot)	T254	HKGMPRLtDLSVKTK	0.985945
		Erk1 Kinase	Proline-dependent serine/threonine kinase group	0.4018	0.000932941	FYN_HUMAN (swissprot)	S307	TLKPGTMsPESFLEE	1.57405
		Itk Kinase	Tyrosine kinase group	0.3531	0.00151135	FYN_HUMAN (swissprot)	Y339	VVSEEPIyIVTEYMN	0.292244
		Abl Kinase	Tyrosine kinase group	0.4557	0.00498383	FYN_HUMAN (swissprot)	Y440	TAPEAALyGRFTIKS	0.502107
		Aurora B	Basophilic serine/threonine kinase	0.5427	0.0075048	FYN_HUMAN (swissprot)	T444	AALYGRFtIKSDVWS	1.05377
		PDK1 Binding	Kinase binding site group	0.5888	0.00778504	FYN_HUMAN (swissprot)	T444	AALYGRFtIKSDVWS	1.05377
		PDK1 Binding	Kinase binding site group	0.5626	0.00493975	FYN_HUMAN (swissprot)	E514	PEERPTFeYLQSFLE	1.10992
Src Kinase	P12931	Protein Kinase A	Basophilic serine/threonine kinase	0.2143	0.00013127	SRC_HUMAN (swissprot)	S17	DASQRRRsLEPAENV	2.6018
		Aurora A	Basophilic serine/threonine kinase	0.3652	0.000753063	SRC_HUMAN (swissprot)	S17	DASQRRRsLEPAENV	2.6018
		CDK1 motif 1 - [ST]Px[KR]x	Proline-dependent serine/threonine kinase group	0.2241	0.000702238	SRC_HUMAN (swissprot)	T37	GAFPASQtPSKPASA	3.1809
		CDK1 motif 2 - [ST]PxxK	Proline-dependent serine/threonine kinase group	0.3818	0.00410889	SRC_HUMAN (swissprot)	T37	GAFPASQtPSKPASA	3.1809
		Cdc2 Kinase	Proline-dependent serine/threonine kinase group	0.5155	0.00903976	SRC_HUMAN (swissprot)	S75	NSSDTVTsPQRAGPL	1.7254
		Cdk5 Kinase	Proline-dependent serine/threonine kinase group	0.4378	0.00532415	SRC_HUMAN (swissprot)	S75	NSSDTVTsPQRAGPL	1.7254
		CDK1 motif 1 - [ST]Px[KR]x	Proline-dependent serine/threonine kinase group	0.3196	0.0032611	SRC_HUMAN (swissprot)	S75	NSSDTVTsPQRAGPL	1.7254
		PDK1 Binding	Kinase binding site group	0.5771	0.0065115	SRC_HUMAN (swissprot)	D94	TTFVALYdYESRTET	1.79836
		PKC alpha/beta/gamma	Basophilic serine/threonine kinase	0.4444	0.0082885	SRC_HUMAN (swissprot)	S104	SRTETDLsFKKGERL	1.46475
		Clk2 Kinase	Basophilic serine/threonine kinase	0.6666	0.00703881	SRC_HUMAN (swissprot)	S161	GKITRREsERLLLNA	2.91402
		Protein Kinase A	Basophilic serine/threonine kinase	0.3739	0.00362617	SRC_HUMAN (swissprot)	S161	GKITRREsERLLLNA	2.91402
		Aurora B	Basophilic serine/threonine kinase	0.4659	0.00266275	SRC_HUMAN (swissprot)	S161	GKITRREsERLLLNA	2.91402
		Itk Kinase	Tyrosine kinase group	0.4252	0.00830768	SRC_HUMAN (swissprot)	Y216	KLDSGGFyITSRTQF	0.417164
		Erk D-domain	Kinase binding site group	0.5892	0.00753591	SRC_HUMAN (swissprot)	V274	RESLRLEvKLGQGCF	0.396486
		Erk1 Kinase	Proline-dependent serine/threonine kinase group	0.448	0.00238473	SRC_HUMAN (swissprot)	S306	TLKPGTMsPEAFLQE	1.18659
		EGFR Kinase	Tyrosine kinase group	0.4078	0.00682955	SRC_HUMAN (swissprot)	Y338	VVSEEPIyIVTEYMS	0.292244
		Itk Kinase	Tyrosine kinase group	0.3531	0.00151135	SRC_HUMAN (swissprot)	Y338	VVSEEPIyIVTEYMS	0.292244
		Casein Kinase 1	Acidophilic serine/threonine kinase group	0.3457	0.00142964	SRC_HUMAN (swissprot)	S348	TEYMSKGsLLDFLKG	0.69031
		Abl Kinase	Tyrosine kinase group	0.4557	0.00498383	SRC_HUMAN (swissprot)	Y439	TAPEAALyGRFTIKS	0.502107
		Aurora B	Basophilic serine/threonine kinase	0.5427	0.0075048	SRC_HUMAN (swissprot)	T443	AALYGRFtIKSDVWS	1.05377
		PDK1 Binding	Kinase binding site group	0.5888	0.00778504	SRC_HUMAN (swissprot)	T443	AALYGRFtIKSDVWS	1.05377
		Cbl-Associated protein C-SH3	Src homology 3 group	0.6782	0.00577084	SRC_HUMAN (swissprot)	P488	GYRMPCPpECPESLH	0.421621
		PDK1 Binding	Kinase binding site group	0.5975	0.00876548	SRC_HUMAN (swissprot)	E513	PEERPTFeYLQAFLE	1.10992
p130Cas	P56945	Nck 2nd SH3	Src homology 3 group	0.4717	0.00353422	BCAR1_HUMAN (swissprot)	P71	VGMYDKKpAGPGPGP	2.19087
		Cdc2 Kinase	Proline-dependent serine/threonine kinase group	0.5135	0.00880308	BCAR1_HUMAN (swissprot)	T81	PGPGPPAtPAQPQPG	1.39767
		Nck 2nd SH3	Src homology 3 group	0.5245	0.00918888	BCAR1_HUMAN (swissprot)	P92	PQPGLHApAPPASQY	1.17661
		p85 SH2	Src homology 2 group	0.42	0.0033442	BCAR1_HUMAN (swissprot)	Y99	PAPPASQyTPMLPNT	1.84043
		Abl SH2	Src homology 2 group	0.4564	0.00889203	BCAR1_HUMAN (swissprot)	Y115	QPQPDSVyLVPTPSK	0.338038
		Crk SH2	Src homology 2 group	0.3797	0.00245296	BCAR1_HUMAN (swissprot)	Y115	QPQPDSVyLVPTPSK	0.338038
		Itk SH2	Src homology 2 group	0.4817	0.00978856	BCAR1_HUMAN (swissprot)	Y115	QPQPDSVyLVPTPSK	0.338038
		PLCg C-terminal SH2	Src homology 2 group	0.3412	0.00116206	BCAR1_HUMAN (swissprot)	Y115	QPQPDSVyLVPTPSK	0.338038
		Abl Kinase	Tyrosine kinase group	0.3432	0.000490285	BCAR1_HUMAN (swissprot)	Y115	QPQPDSVyLVPTPSK	0.338038
		EGFR Kinase	Tyrosine kinase group	0.3329	0.000946934	BCAR1_HUMAN (swissprot)	Y115	QPQPDSVyLVPTPSK	0.338038
		Fgr Kinase	Tyrosine kinase group	0.3957	0.0042097	BCAR1_HUMAN (swissprot)	Y115	QPQPDSVyLVPTPSK	0.338038
		CDK1 motif 1 - [ST]Px[KR]x	Proline-dependent serine/threonine kinase group	0.3148	0.00309623	BCAR1_HUMAN (swissprot)	T119	DSVYLVPtPSKAQQG	1.57297
		Abl SH2	Src homology 2 group	0.4126	0.00425088	BCAR1_HUMAN (swissprot)	Y128	SKAQQGLyQVPGPSP	0.582466
		Crk SH2	Src homology 2 group	0.3679	0.00178092	BCAR1_HUMAN (swissprot)	Y128	SKAQQGLyQVPGPSP	0.582466
		Abl Kinase	Tyrosine kinase group	0.4024	0.00188387	BCAR1_HUMAN (swissprot)	Y128	SKAQQGLyQVPGPSP	0.582466
		CDK1 motif 2 - [ST]PxxK	Proline-dependent serine/threonine kinase group	0.4302	0.00831494	BCAR1_HUMAN (swissprot)	S139	GPSPQFQsPPAKQTS	1.11243
		Cdc2 Kinase	Proline-dependent serine/threonine kinase group	0.5071	0.00804571	BCAR1_HUMAN (swissprot)	T152	TSTFSKQtPHHPFPS	3.27952
		Cdk5 Kinase	Proline-dependent serine/threonine kinase group	0.448	0.00611692	BCAR1_HUMAN (swissprot)	T152	TSTFSKQtPHHPFPS	3.27952
		Abl SH2	Src homology 2 group	0.3196	0.000493417	BCAR1_HUMAN (swissprot)	Y165	PSPATDLyQVPPGPG	0.982911
		Crk SH2	Src homology 2 group	0.3004	0.000286793	BCAR1_HUMAN (swissprot)	Y165	PSPATDLyQVPPGPG	0.982911
		Itk SH2	Src homology 2 group	0.4113	0.00206134	BCAR1_HUMAN (swissprot)	Y165	PSPATDLyQVPPGPG	0.982911
		Nck SH2	Src homology 2 group	0.4304	0.00445409	BCAR1_HUMAN (swissprot)	Y165	PSPATDLyQVPPGPG	0.982911
		Abl Kinase	Tyrosine kinase group	0.2768	8.55934e-05	BCAR1_HUMAN (swissprot)	Y165	PSPATDLyQVPPGPG	0.982911
		Abl SH2	Src homology 2 group	0.3658	0.00153729	BCAR1_HUMAN (swissprot)	Y179	GGPAQDIyQVPPSAG	0.835475
		Crk SH2	Src homology 2 group	0.2986	0.000279402	BCAR1_HUMAN (swissprot)	Y179	GGPAQDIyQVPPSAG	0.835475
		Itk SH2	Src homology 2 group	0.4548	0.00536348	BCAR1_HUMAN (swissprot)	Y179	GGPAQDIyQVPPSAG	0.835475
		Nck SH2	Src homology 2 group	0.4673	0.00922211	BCAR1_HUMAN (swissprot)	Y179	GGPAQDIyQVPPSAG	0.835475
		Abl Kinase	Tyrosine kinase group	0.3518	0.000623183	BCAR1_HUMAN (swissprot)	Y179	GGPAQDIyQVPPSAG	0.835475
		Abl SH2	Src homology 2 group	0.4136	0.00432321	BCAR1_HUMAN (swissprot)	Y192	AGMGHDIyQVPPSMD	0.835475
		Crk SH2	Src homology 2 group	0.3313	0.000720306	BCAR1_HUMAN (swissprot)	Y192	AGMGHDIyQVPPSMD	0.835475
		Itk SH2	Src homology 2 group	0.4808	0.00962123	BCAR1_HUMAN (swissprot)	Y192	AGMGHDIyQVPPSMD	0.835475
		Crk SH2	Src homology 2 group	0.3933	0.00324717	BCAR1_HUMAN (swissprot)	Y234	AQPEQDEyDIPRHLL	1.87982
		Nck SH2	Src homology 2 group	0.4568	0.00737571	BCAR1_HUMAN (swissprot)	Y234	AQPEQDEyDIPRHLL	1.87982
		Abl SH2	Src homology 2 group	0.3658	0.00153729	BCAR1_HUMAN (swissprot)	Y249	APGPQDIyDVPPVRG	0.805636
		Crk SH2	Src homology 2 group	0.2612	0.000134185	BCAR1_HUMAN (swissprot)	Y249	APGPQDIyDVPPVRG	0.805636
		Itk SH2	Src homology 2 group	0.4376	0.00376726	BCAR1_HUMAN (swissprot)	Y249	APGPQDIyDVPPVRG	0.805636
		Nck SH2	Src homology 2 group	0.3463	0.000687641	BCAR1_HUMAN (swissprot)	Y249	APGPQDIyDVPPVRG	0.805636
		Abl Kinase	Tyrosine kinase group	0.3654	0.000882125	BCAR1_HUMAN (swissprot)	Y249	APGPQDIyDVPPVRG	0.805636
		Abl SH3	Src homology 3 group	0.4198	0.004617	BCAR1_HUMAN (swissprot)	P252	PQDIYDVpPVRGLLP	0.987299
		Abl SH2	Src homology 2 group	0.421	0.00485849	BCAR1_HUMAN (swissprot)	Y267	SQYGQEVyDTPPMAV	1.72009
		Crk SH2	Src homology 2 group	0.3045	0.000334392	BCAR1_HUMAN (swissprot)	Y267	SQYGQEVyDTPPMAV	1.72009
		Itk SH2	Src homology 2 group	0.4639	0.006479	BCAR1_HUMAN (swissprot)	Y267	SQYGQEVyDTPPMAV	1.72009
		Nck SH2	Src homology 2 group	0.3013	0.000206124	BCAR1_HUMAN (swissprot)	Y267	SQYGQEVyDTPPMAV	1.72009
		Abl Kinase	Tyrosine kinase group	0.4815	0.0077567	BCAR1_HUMAN (swissprot)	Y267	SQYGQEVyDTPPMAV	1.72009
		Abl SH2	Src homology 2 group	0.3815	0.00226152	BCAR1_HUMAN (swissprot)	Y287	RDPLLEVyDVPPSVE	0.88462
		Crk SH2	Src homology 2 group	0.2458	8.9834e-05	BCAR1_HUMAN (swissprot)	Y287	RDPLLEVyDVPPSVE	0.88462
		Itk SH2	Src homology 2 group	0.4162	0.00226303	BCAR1_HUMAN (swissprot)	Y287	RDPLLEVyDVPPSVE	0.88462
		Nck SH2	Src homology 2 group	0.3415	0.000617838	BCAR1_HUMAN (swissprot)	Y287	RDPLLEVyDVPPSVE	0.88462
		Abl Kinase	Tyrosine kinase group	0.4421	0.00395179	BCAR1_HUMAN (swissprot)	Y287	RDPLLEVyDVPPSVE	0.88462
		Abl SH2	Src homology 2 group	0.3758	0.00199858	BCAR1_HUMAN (swissprot)	Y306	PSNHHAVyDVPPSVS	0.516028
		Crk SH2	Src homology 2 group	0.261	0.000133609	BCAR1_HUMAN (swissprot)	Y306	PSNHHAVyDVPPSVS	0.516028
		Nck SH2	Src homology 2 group	0.3566	0.000837427	BCAR1_HUMAN (swissprot)	Y306	PSNHHAVyDVPPSVS	0.516028
		p85 SH3 mode1	Src homology 3 group	0.5265	0.00329555	BCAR1_HUMAN (swissprot)	P317	PSVSKDVpDGPLLRE	1.1224
		PKC mu	Basophilic serine/threonine kinase	0.4329	0.00679494	BCAR1_HUMAN (swissprot)	T326	GPLLREEtYDVPPAF	1.92651
		Abl SH2	Src homology 2 group	0.3843	0.00239068	BCAR1_HUMAN (swissprot)	Y327	PLLREETyDVPPAFA	1.72009
		Crk SH2	Src homology 2 group	0.342	0.000987751	BCAR1_HUMAN (swissprot)	Y327	PLLREETyDVPPAFA	1.72009
		Itk SH2	Src homology 2 group	0.4319	0.00323827	BCAR1_HUMAN (swissprot)	Y327	PLLREETyDVPPAFA	1.72009
		Nck SH2	Src homology 2 group	0.4057	0.00267976	BCAR1_HUMAN (swissprot)	Y327	PLLREETyDVPPAFA	1.72009
		Abl Kinase	Tyrosine kinase group	0.4497	0.00449696	BCAR1_HUMAN (swissprot)	Y327	PLLREETyDVPPAFA	1.72009
		Itk SH3	Src homology 3 group	0.603	0.00863553	BCAR1_HUMAN (swissprot)	P338	PAFAKAKpFDPARTP	1.6008
		Erk1 Kinase	Proline-dependent serine/threonine kinase group	0.5257	0.00965015	BCAR1_HUMAN (swissprot)	S355	LAAPPPDsPPAEDVY	1.91554
		Abl SH2	Src homology 2 group	0.2972	0.000239907	BCAR1_HUMAN (swissprot)	Y362	SPPAEDVyDVPPPAP	0.853027
		Crk SH2	Src homology 2 group	0.1754	6.0719e-06	BCAR1_HUMAN (swissprot)	Y362	SPPAEDVyDVPPPAP	0.853027
		Itk SH2	Src homology 2 group	0.3017	0.000140355	BCAR1_HUMAN (swissprot)	Y362	SPPAEDVyDVPPPAP	0.853027
		Nck SH2	Src homology 2 group	0.2655	6.76111e-05	BCAR1_HUMAN (swissprot)	Y362	SPPAEDVyDVPPPAP	0.853027
		PLCg C-terminal SH2	Src homology 2 group	0.392	0.00404718	BCAR1_HUMAN (swissprot)	Y362	SPPAEDVyDVPPPAP	0.853027
		Abl Kinase	Tyrosine kinase group	0.2904	0.000118026	BCAR1_HUMAN (swissprot)	Y362	SPPAEDVyDVPPPAP	0.853027
		EGFR Kinase	Tyrosine kinase group	0.3855	0.00385808	BCAR1_HUMAN (swissprot)	Y362	SPPAEDVyDVPPPAP	0.853027
		Abl SH2	Src homology 2 group	0.3339	0.000701705	BCAR1_HUMAN (swissprot)	Y372	PPPAPDLyDVPPGLR	0.947807
		Crk SH2	Src homology 2 group	0.2883	0.00023711	BCAR1_HUMAN (swissprot)	Y372	PPPAPDLyDVPPGLR	0.947807
		Itk SH2	Src homology 2 group	0.4238	0.00257586	BCAR1_HUMAN (swissprot)	Y372	PPPAPDLyDVPPGLR	0.947807
		Nck SH2	Src homology 2 group	0.3346	0.000517495	BCAR1_HUMAN (swissprot)	Y372	PPPAPDLyDVPPGLR	0.947807
		Abl Kinase	Tyrosine kinase group	0.307	0.000185066	BCAR1_HUMAN (swissprot)	Y372	PPPAPDLyDVPPGLR	0.947807
		Erk D-domain	Kinase binding site group	0.5584	0.00495103	BCAR1_HUMAN (swissprot)	L386	RRPGPGTlYDVPRER	0.524219
		Abl SH2	Src homology 2 group	0.4576	0.00908985	BCAR1_HUMAN (swissprot)	Y387	RPGPGTLyDVPRERV	0.819093
		Crk SH2	Src homology 2 group	0.3816	0.00256392	BCAR1_HUMAN (swissprot)	Y387	RPGPGTLyDVPRERV	0.819093
		Nck SH2	Src homology 2 group	0.4511	0.0067449	BCAR1_HUMAN (swissprot)	Y387	RPGPGTLyDVPRERV	0.819093
		Abl Kinase	Tyrosine kinase group	0.3067	0.000183621	BCAR1_HUMAN (swissprot)	Y387	RPGPGTLyDVPRERV	0.819093
		Crk SH2	Src homology 2 group	0.3631	0.00163393	BCAR1_HUMAN (swissprot)	Y410	GVVDSGVyAVPPPAE	0.305795
		Itk SH2	Src homology 2 group	0.3948	0.00138216	BCAR1_HUMAN (swissprot)	Y410	GVVDSGVyAVPPPAE	0.305795
		PLCg C-terminal SH2	Src homology 2 group	0.3262	0.00085249	BCAR1_HUMAN (swissprot)	Y410	GVVDSGVyAVPPPAE	0.305795
		Abl Kinase	Tyrosine kinase group	0.3754	0.00108731	BCAR1_HUMAN (swissprot)	Y410	GVVDSGVyAVPPPAE	0.305795
		Protein Kinase A	Basophilic serine/threonine kinase	0.4442	0.00772056	BCAR1_HUMAN (swissprot)	S428	PAEGKRLsASSTGST	0.899979
		Aurora A	Basophilic serine/threonine kinase	0.5004	0.00520283	BCAR1_HUMAN (swissprot)	S428	PAEGKRLsASSTGST	0.899979
		Aurora B	Basophilic serine/threonine kinase	0.404	0.00100863	BCAR1_HUMAN (swissprot)	S428	PAEGKRLsASSTGST	0.899979
		Erk D-domain	Kinase binding site group	0.5746	0.00611662	BCAR1_HUMAN (swissprot)	V458	REPLELEvAVEALAR	0.315451
		14-3-3 Mode 1	Phosphoserine/threonine binding group	0.1914	0.000124528	BCAR1_HUMAN (swissprot)	S494	TGSWRSPsEPQEPLV	2.95135
		DNA PK	DNA damage kinase group	0.479	0.00517213	BCAR1_HUMAN (swissprot)	T572	GRGGSGAtLEDLDRL	0.788628
		PKC mu	Basophilic serine/threonine kinase	0.4329	0.00679494	BCAR1_HUMAN (swissprot)	T608	ASLLFRRtKATAPGP	3.69934
		p85 SH3 mode1	Src homology 3 group	0.496	0.00196327	BCAR1_HUMAN (swissprot)	P638	SIQSRPLpSPPKFTS	1.44788
		Src SH3	Src homology 3 group	0.239	5.82586e-05	BCAR1_HUMAN (swissprot)	P638	SIQSRPLpSPPKFTS	1.44788
		Cdc2 Kinase	Proline-dependent serine/threonine kinase group	0.4851	0.00581842	BCAR1_HUMAN (swissprot)	S639	IQSRPLPsPPKFTSQ	1.87258
		Cdk5 Kinase	Proline-dependent serine/threonine kinase group	0.439	0.00541742	BCAR1_HUMAN (swissprot)	S639	IQSRPLPsPPKFTSQ	1.87258
		Erk1 Kinase	Proline-dependent serine/threonine kinase group	0.4769	0.00412745	BCAR1_HUMAN (swissprot)	S639	IQSRPLPsPPKFTSQ	1.87258
		p85 SH3 mode2	Src homology 3 group	0.6046	0.00915819	BCAR1_HUMAN (swissprot)	P641	SRPLPSPpKFTSQDS	1.83513
		GSK3-improved	Acidophilic serine/threonine kinase group	0.4612	0.00838228	BCAR1_HUMAN (swissprot)	T644	LPSPPKFtSQDSPDG	2.21978
		DNA PK	DNA damage kinase group	0.4561	0.0034769	BCAR1_HUMAN (swissprot)	S645	PSPPKFTsQDSPDGQ	1.48748
		Grb2 SH2	Src homology 2 group	0.5	0.00658274	BCAR1_HUMAN (swissprot)	Y653	QDSPDGQyENSEGGW	2.3852
		Src SH2	Src homology 2 group	0.3989	0.00766621	BCAR1_HUMAN (swissprot)	Y664	EGGWMEDyDYVHLQG	2.01693
		EGFR Kinase	Tyrosine kinase group	0.414	0.00805145	BCAR1_HUMAN (swissprot)	Y666	GWMEDYDyVHLQGKE	0.782585
		Fgr Kinase	Tyrosine kinase group	0.4351	0.00982951	BCAR1_HUMAN (swissprot)	Y666	GWMEDYDyVHLQGKE	0.782585
		DNA PK	DNA damage kinase group	0.471	0.00452079	BCAR1_HUMAN (swissprot)	T678	GKEEFEKtQKELLEK	6.87056
		PKC alpha/beta/gamma	Basophilic serine/threonine kinase	0.4329	0.00660184	BCAR1_HUMAN (swissprot)	S687	KELLEKGsITRQGKS	1.20431
		PKC delta	Basophilic serine/threonine kinase	0.4005	0.0054224	BCAR1_HUMAN (swissprot)	S687	KELLEKGsITRQGKS	1.20431
		Crk SH3	Src homology 3 group	0.4547	0.00701153	BCAR1_HUMAN (swissprot)	P727	ANWTPAQpLAPGRTG	0.798669
		Cbl-Associated protein C-SH3	Src homology 3 group	0.564	0.00131332	BCAR1_HUMAN (swissprot)	P730	TPAQPLApGRTGGLG	0.825834
		Intersectin SH3A	Src homology 3 group	0.6666	0.00946073	BCAR1_HUMAN (swissprot)	P730	TPAQPLApGRTGGLG	0.825834
		p85 SH3 mode2	Src homology 3 group	0.5531	0.00426972	BCAR1_HUMAN (swissprot)	P730	TPAQPLApGRTGGLG	0.825834
Calpain II	P17655	PDK1 Binding	Kinase binding site group	0.591	0.00803297	CAN2_HUMAN (swissprot)	S50	GTLFQDPsFPAIPSA	1.0727
		Cortactin SH3	Src homology 3 group	0.5519	0.00592763	CAN2_HUMAN (swissprot)	P52	LFQDPSFpAIPSALG	0.45027
		Protein Kinase A	Basophilic serine/threonine kinase	0.4237	0.00636947	CAN2_HUMAN (swissprot)	T79	GIEWKRPtEICADPQ	0.651819
		Aurora B	Basophilic serine/threonine kinase	0.5373	0.00707792	CAN2_HUMAN (swissprot)	T79	GIEWKRPtEICADPQ	0.651819
		PDK1 Binding	Kinase binding site group	0.5636	0.00504815	CAN2_HUMAN (swissprot)	T208	TEGFEDFtGGIAEWY	0.328327
		Protein Kinase A	Basophilic serine/threonine kinase	0.429	0.00668584	CAN2_HUMAN (swissprot)	S369	DGNWRRGsTAGGCRN	0.858868
		14-3-3 Mode 1	Phosphoserine/threonine binding group	0.4316	0.00742801	CAN2_HUMAN (swissprot)	T370	GNWRRGStAGGCRNY	0.433954
		Shc PTB	Phosphotyrosine binding group	0.5111	0.00431264	CAN2_HUMAN (swissprot)	Y387	TFWMNPQyLIKLEEE	1.11167
		Casein Kinase 1	Acidophilic serine/threonine kinase group	0.3529	0.00183021	CAN2_HUMAN (swissprot)	S403	EDEEDGEsGCTFLVG	0.402957
		Abl Kinase	Tyrosine kinase group	0.4908	0.00896763	CAN2_HUMAN (swissprot)	Y434	HTIGFGIyEVPEELS	0.495096
		PDK1 Binding	Kinase binding site group	0.5975	0.00876548	CAN2_HUMAN (swissprot)	E435	TIGFGIYeVPEELSG	0.866418
		Akt Kinase	Basophilic serine/threonine kinase	0.5449	0.00630711	CAN2_HUMAN (swissprot)	S462	TNRARERsDTFINLR	2.17401
		Akt Kinase	Basophilic serine/threonine kinase	0.3696	0.000349828	CAN2_HUMAN (swissprot)	T464	RARERSDtFINLREV	0.750278
		Erk D-domain	Kinase binding site group	0.5793	0.00657351	CAN2_HUMAN (swissprot)	I466	RERSDTFiNLREVLN	0.541511
		PLCg C-terminal SH2	Src homology 2 group	0.4033	0.00514607	CAN2_HUMAN (swissprot)	Y482	FKLPPGEyILVPSTF	0.264051
		EGFR Kinase	Tyrosine kinase group	0.3113	0.0004981	CAN2_HUMAN (swissprot)	Y482	FKLPPGEyILVPSTF	0.264051
		Casein Kinase 2	Acidophilic serine/threonine kinase group	0.3906	0.00223773	CAN2_HUMAN (swissprot)	S526	NLEEFDIsEDDIDDG	1.73636
		Akt Kinase	Basophilic serine/threonine kinase	0.5494	0.00674879	CAN2_HUMAN (swissprot)	T621	IDVDRSGtMNSYEMR	0.971415
		14-3-3 Mode 1	Phosphoserine/threonine binding group	0.4346	0.0076906	CAN2_HUMAN (swissprot)	T621	IDVDRSGtMNSYEMR	0.971415
		PKC zeta	Basophilic serine/threonine kinase	0.4505	0.00491526	CAN2_HUMAN (swissprot)	T671	RCLVRLEtLFKIFKQ	0.674576
Protein Kinase C (PKC)	P17252	DNA PK	DNA damage kinase group	0.4117	0.0015804	KPCA_HUMAN (swissprot)	S13	PGNDSTAsQDVANRF	0.961141
		Calmodulin dependent Kinase 2	Basophilic serine/threonine kinase	0.4532	0.00378565	KPCA_HUMAN (swissprot)	T48	ARFFKQPtFCSHCTD	0.550918
		PKC delta	Basophilic serine/threonine kinase	0.3521	0.00134376	KPCA_HUMAN (swissprot)	T48	ARFFKQPtFCSHCTD	0.550918
		PKC zeta	Basophilic serine/threonine kinase	0.4232	0.00237291	KPCA_HUMAN (swissprot)	T48	ARFFKQPtFCSHCTD	0.550918
		PDK1 Binding	Kinase binding site group	0.6069	0.00982479	KPCA_HUMAN (swissprot)	T48	ARFFKQPtFCSHCTD	0.550918
		PDK1 Binding	Kinase binding site group	0.5784	0.00665241	KPCA_HUMAN (swissprot)	S85	CHEFVTFsCPGADKG	0.31481
		PDK1 Binding	Kinase binding site group	0.536	0.00276764	KPCA_HUMAN (swissprot)	T108	KHKFKIHtYGSPTFC	0.655544
		Calmodulin dependent Kinase 2	Basophilic serine/threonine kinase	0.4506	0.00355686	KPCA_HUMAN (swissprot)	T212	KNESKQKtKTIRSTL	2.31745
		PKC epsilon	Basophilic serine/threonine kinase	0.3586	0.000988384	KPCA_HUMAN (swissprot)	T214	ESKQKTKtIRSTLNP	1.75629
		PLK1 Kinase	Acidophilic serine/threonine kinase group	0.3277	0.00755814	KPCA_HUMAN (swissprot)	S226	LNPQWNEsFTFKLKP	0.961141
		PDK1 Binding	Kinase binding site group	0.5827	0.00711852	KPCA_HUMAN (swissprot)	T228	PQWNESFtFKLKPSD	0.548093
		Akt Kinase	Basophilic serine/threonine kinase	0.4968	0.0031376	KPCA_HUMAN (swissprot)	S241	SDKDRRLsVEIWDWD	0.446962
		Calmodulin dependent Kinase 2	Basophilic serine/threonine kinase	0.4099	0.00147833	KPCA_HUMAN (swissprot)	S241	SDKDRRLsVEIWDWD	0.446962
		Protein Kinase A	Basophilic serine/threonine kinase	0.2887	0.000958953	KPCA_HUMAN (swissprot)	S241	SDKDRRLsVEIWDWD	0.446962
		Aurora A	Basophilic serine/threonine kinase	0.4141	0.00163641	KPCA_HUMAN (swissprot)	S241	SDKDRRLsVEIWDWD	0.446962
		Aurora B	Basophilic serine/threonine kinase	0.4728	0.00296261	KPCA_HUMAN (swissprot)	S241	SDKDRRLsVEIWDWD	0.446962
		Erk D-domain	Kinase binding site group	0.6072	0.00954951	KPCA_HUMAN (swissprot)	V242	DKDRRLSvEIWDWDR	0.239948
		Fgr SH2	Src homology 2 group	0.3841	0.00191196	KPCA_HUMAN (swissprot)	Y285	LNQEEGEyYNVPIPE	1.19522
		Grb2 SH2	Src homology 2 group	0.1621	1.59778e-05	KPCA_HUMAN (swissprot)	Y285	LNQEEGEyYNVPIPE	1.19522
		Itk SH2	Src homology 2 group	0.4549	0.00537276	KPCA_HUMAN (swissprot)	Y285	LNQEEGEyYNVPIPE	1.19522
		EGFR Kinase	Tyrosine kinase group	0.3406	0.00114902	KPCA_HUMAN (swissprot)	Y285	LNQEEGEyYNVPIPE	1.19522
		Fgr Kinase	Tyrosine kinase group	0.3229	0.000611063	KPCA_HUMAN (swissprot)	Y285	LNQEEGEyYNVPIPE	1.19522
		Insulin Receptor Kinase	Tyrosine kinase group	0.5865	0.0048446	KPCA_HUMAN (swissprot)	Y285	LNQEEGEyYNVPIPE	1.19522
		PDGFR Kin	Tyrosine kinase group	0.3043	0.0010793	KPCA_HUMAN (swissprot)	Y285	LNQEEGEyYNVPIPE	1.19522
		Crk SH2	Src homology 2 group	0.3487	0.00119293	KPCA_HUMAN (swissprot)	Y286	NQEEGEYyNVPIPEG	1.86753
		PLCg C-terminal SH2	Src homology 2 group	0.3893	0.00378462	KPCA_HUMAN (swissprot)	Y286	NQEEGEYyNVPIPEG	1.86753
		Lck Kinase	Tyrosine kinase group	0.4753	0.0073771	KPCA_HUMAN (swissprot)	Y365	RKGTEELyAIKILKK	0.726294
		Grb2 SH2	Src homology 2 group	0.4892	0.00546481	KPCA_HUMAN (swissprot)	Y419	RLYFVMEyVNGGDLM	0.754876
		SHIP SH2	Src homology 2 group	0.4121	0.00871048	KPCA_HUMAN (swissprot)	Y461	LHKRGIIyRDLKLDN	0.475941
		Erk1 Kinase	Proline-dependent serine/threonine kinase group	0.5213	0.00906914	KPCA_HUMAN (swissprot)	T638	TRGQPVLtPPDQLVI	0.808315
		PDK1 Binding	Kinase binding site group	0.0962	2.68186e-05	KPCA_HUMAN (swissprot)	S657	QSDFEGFsYVNPQFV	0.511114
		Grb2 SH2	Src homology 2 group	0.4892	0.00546481	KPCA_HUMAN (swissprot)	Y658	SDFEGFSyVNPQFVH	0.798615

## Sheet: Proteins Analyzed
Protein	Accession		Type Legend
Integrin Alpha 1	P56199		Non-enzyme protein
Integrin Alpha 2	P17301		Ser/Thr kinase
Integrin Alpha 3	P26006		Other enzyme
Integrin Alpha 4	P13612		Modulator of GTPases
Integrin Alpha 5	P08648		Tyrosine kinase
Integrin Alpha 6	P23229		Heparan-sulfate proteoglycan
Integrin Alpha 7	Q13683
Integrin Alpha 8	P53708
Integrin Alpha 9	Q13797
Integrin Alpha V	P06756
Integrin Beta 1	P05556
Integrin Beta 4	P16144
Integrin Beta 5	P18084
Integrin Beta 6	P18564
Integrin Beta 7	P26010
Integrin Beta 8	P26012
Syndecan-4	P31431
Urokinase Plasminogen Activator Receptor (uPAR)	P00749
SHP-2 Substrate 1 (SHPS-1)	P78324
Talin	Q9Y490
Filamin	P21333
Alpha Actinin	P12814
Tensin	Q9HBL0
Syndesmos	Q9BRJ7
Receptor-like tyrosine phosphatase alpha	P18433
Focal Adhesion Kinase	Q05397
Paxillin	P49023
Integrin-Linked Protein Kinase	Q13418
Caveolin	Q03135
PINCH-1	P48059
Vasodilator-stimulated phosphoprotein (VASP)	P50552
Parvin	Q9NVD7
Vinculin	P18206
Zyxin	Q15942
Palladin	Q8WX93
Vinexin	O60504
Ponsin	Q9BX66
ASAP1	Q9ULH1
Syntenin	O00560
p21-activated kinase (PAK)	Q13153
Protein Kinase AKT	P31749
Phosphatidyl inositol 3-kinase (PI3K)	P42336
Fyn	P06241
Src Kinase	P12931
p130Cas	P56945
Calpain II	P17655
Protein Kinase C (PKC)	P17252

## Sheet: Binding Sites Sorted
MOTIF_NAME	MOTIF_GROUP	SCORE	PERCENTILE	PROTEIN	SITE	SITE_SEQUENCE	SURFACE_ACCESS_VALUE
Src SH3	Src homology 3 group	0.2968	0.000208864	ITA5_HUMAN (swissprot)	P24	WGPRRRPpLLPLLLL	1.1286
Src SH3	Src homology 3 group	0.4326	0.00346722	ITA6_HUMAN (swissprot)	P620	RDKLRPIpITASVEI	0.392543
Src SH3	Src homology 3 group	0.4915	0.0093199	FLNA_HUMAN (swissprot)	P1926	TCSVSYLpVLPGDYS	0.433382
Src SH3	Src homology 3 group	0.4727	0.00708992	FLNA_HUMAN (swissprot)	P2151	ITRRRRApSVANVGS	0.70454
Src SH3	Src homology 3 group	0.4867	0.00875055	TENS1_HUMAN (swissprot)	P973	PSGVRSPpGLAKTPL	0.605405
Src SH3	Src homology 3 group	0.4886	0.00897592	TENS1_HUMAN (swissprot)	P1384	FRQGSPTpALPEKRR	1.01871
Src SH3	Src homology 3 group	0.4867	0.00875055	PTPRA_HUMAN (swissprot)	P219	PSTNRKYpPLPVDKL	2.18948
Src SH3	Src homology 3 group	0.327	0.000403986	FAK1_HUMAN (swissprot)	P371	KEGERALpSIPKLAN	0.428828
Src SH3	Src homology 3 group	0.4968	0.00994857	FAK1_HUMAN (swissprot)	P869	QPVGKPDpAAPPKKP	1.44402
Src SH3	Src homology 3 group	0.4902	0.0091657	PAXI_HUMAN (swissprot)	P50	IAVPPPVpPPPSSEA	1.50356
Src SH3	Src homology 3 group	0.4449	0.00439715	VASP_HUMAN (swissprot)	P122	GGGPPPPpALPTWSV	1.09147
Src SH3	Src homology 3 group	0.495	0.00973506	VASP_HUMAN (swissprot)	P176	GPPPPPGpPPPPGPP	2.00475
Src SH3	Src homology 3 group	0.4685	0.00659173	VASP_HUMAN (swissprot)	P186	PPGPPPPpGLPPSGV	1.0692
Src SH3	Src homology 3 group	0.4897	0.00910639	VASP_HUMAN (swissprot)	P208	GGGPPPApPLPAAQG	1.09147
Src SH3	Src homology 3 group	0.409	0.00209974	ZYX_HUMAN (swissprot)	P74	PPEDFPLpPPPLAGD	1.67063
Src SH3	Src homology 3 group	0.4767	0.00756438	ZYX_HUMAN (swissprot)	P132	GGPEAPIpPPPQPRE	1.42003
Src SH3	Src homology 3 group	0.4602	0.00580993	ZYX_HUMAN (swissprot)	P210	PSSSQPLpQVPAPAQ	0.898128
Src SH3	Src homology 3 group	0.4867	0.00875055	PALLD_HUMAN (swissprot)	P648	SPTKEPPpLLAKPKL	0.58212
Src SH3	Src homology 3 group	0.4968	0.00994857	PALLD_HUMAN (swissprot)	P679	EAGARQPpPAPRSAP	2.2921
Src SH3	Src homology 3 group	0.4921	0.00939107	PALLD_HUMAN (swissprot)	P686	PPAPRSApPSPPFPP	1.53716
Src SH3	Src homology 3 group	0.4353	0.00362497	PALLD_HUMAN (swissprot)	P799	WGSSSPSpPPPPPPV	2.71477
Src SH3	Src homology 3 group	0.4483	0.0047111	PALLD_HUMAN (swissprot)	P801	SSSPSPPpPPPPVFS	3.13242
Src SH3	Src homology 3 group	0.399	0.00178294	PALLD_HUMAN (swissprot)	P822	VPDVFPLpPPPPPLP	1.67063
Src SH3	Src homology 3 group	0.4012	0.00185264	PALLD_HUMAN (swissprot)	P826	FPLPPPPpPLPSPGQ	1.67063
Src SH3	Src homology 3 group	0.4685	0.00659173	SRBS1_HUMAN (swissprot)	P246	PSFSPPPpLVPPAPE	0.8019
Src SH3	Src homology 3 group	0.4566	0.00547751	SRBS1_HUMAN (swissprot)	P1008	LALTPPLpPLPEASI	0.891
Src SH3	Src homology 3 group	0.3233	0.000370653	ASAP1_HUMAN (swissprot)	P829	LSKKRPPpPPPGHKR	3.13242
Src SH3	Src homology 3 group	0.4716	0.00695944	ASAP1_HUMAN (swissprot)	P846	SDPPSPLpHGPPNKG	0.940896
Src SH3	Src homology 3 group	0.3564	0.000725587	ASAP1_HUMAN (swissprot)	P895	ALGPRVLpKLPQKVA	0.553133
Src SH3	Src homology 3 group	0.4968	0.00994857	ASAP1_HUMAN (swissprot)	P990	KPQMKDLpPKPQLGD	2.33353
Src SH3	Src homology 3 group	0.4785	0.00777789	PAK1_HUMAN (swissprot)	P42	NHGSKPLpPNPEEKK	1.80428
Src SH3	Src homology 3 group	0.3794	0.0011716	PAK1_HUMAN (swissprot)	P210	RSVIEPLpVTPTRDV	0.74844
Src SH3	Src homology 3 group	0.239	5.82586e-05	BCAR1_HUMAN (swissprot)	P638	SIQSRPLpSPPKFTS	1.44788
Src SH2	Src homology 2 group	0.4029	0.00823545	ITA5_HUMAN (swissprot)	Y830	GPAVHHVyELINQGP	0.36307
Src SH2	Src homology 2 group	0.4149	0.00994315	ITA7_HUMAN (swissprot)	Y400	EELGGAVyVYLNQGG	0.258227
Src SH2	Src homology 2 group	0.3996	0.00776583	ITB6_HUMAN (swissprot)	Y368	LQLIISAyEELRSEV	1.20241
Src SH2	Src homology 2 group	0.3785	0.00527536	ITB7_HUMAN (swissprot)	Y356	TSAALPVyQELSKLI	1.01932
Src SH2	Src homology 2 group	0.4029	0.00823545	FLNA_HUMAN (swissprot)	Y403	NIANKTTyFEIFTAG	0.786194
Src SH2	Src homology 2 group	0.413	0.00967277	FAK1_HUMAN (swissprot)	Y925	DRSNDKVyENVTGLV	1.14411
Src SH2	Src homology 2 group	0.2604	0.00041393	PAXI_HUMAN (swissprot)	Y40	YPTGNHTyQEIAVPP	1.48254
Src SH2	Src homology 2 group	0.3989	0.00766621	BCAR1_HUMAN (swissprot)	Y664	EGGWMEDyDYVHLQG	2.01693
Src Kinase	Tyrosine kinase group	0.4916	0.00724516	ITB6_HUMAN (swissprot)	Y533	LSPYGNIyGPYCQCD	1.00787
SHIP SH2	Src homology 2 group	0.418	0.00963221	ITB4_HUMAN (swissprot)	Y1564	LQGYSVEyQLLNGGE	0.543635
SHIP SH2	Src homology 2 group	0.4142	0.00903855	ITB6_HUMAN (swissprot)	Y202	NPCSSIPyFCLPTFG	0.148987
SHIP SH2	Src homology 2 group	0.2835	0.000419952	SHPS1_HUMAN (swissprot)	Y429	QDTNDITyADLNLPK	0.505411
SHIP SH2	Src homology 2 group	0.3013	0.000704284	FLNA_HUMAN (swissprot)	Y1047	PYEVEVTyDGVPVPG	0.471797
SHIP SH2	Src homology 2 group	0.3887	0.0052812	FLNA_HUMAN (swissprot)	Y1221	DGTHTITyIPLCPGA	0.324716
SHIP SH2	Src homology 2 group	0.4177	0.00958534	PTPRA_HUMAN (swissprot)	Y655	PSDGLVSyGDITVEL	0.413759
SHIP SH2	Src homology 2 group	0.3326	0.00161333	PALLD_HUMAN (swissprot)	Y990	ESGDEVQyGDVPVEN	0.566157
SHIP SH2	Src homology 2 group	0.4177	0.00958534	SRBS1_HUMAN (swissprot)	Y937	LVKNPVDyMDLPFSS	0.606597
SHIP SH2	Src homology 2 group	0.3454	0.00208999	AKT1_HUMAN (swissprot)	Y272	HSEKNVVyRDLKLEN	0.53358
SHIP SH2	Src homology 2 group	0.4121	0.00871048	KPCA_HUMAN (swissprot)	Y461	LHKRGIIyRDLKLDN	0.475941
Shc SH2	Src homology 2 group	0.4426	0.00544862	ITA5_HUMAN (swissprot)	Y703	TAPPEAEySGLVRHP	0.687094
Shc SH2	Src homology 2 group	0.4581	0.0076205	ITB4_HUMAN (swissprot)	Y333	TNYSYSYyEKLHTYF	2.1536
Shc SH2	Src homology 2 group	0.4496	0.00642947	FLNA_HUMAN (swissprot)	Y1047	PYEVEVTyDGVPVPG	0.471797
Shc SH2	Src homology 2 group	0.4256	0.00358821	ACTN1_HUMAN (swissprot)	Y279	NEQLMEDyEKLASDL	2.96621
Shc SH2	Src homology 2 group	0.452	0.00676576	SRBS1_HUMAN (swissprot)	Y1240	LFSYQALySYIPQND	0.44034
Shc PTB	Phosphotyrosine binding group	0.5526	0.00982785	ITB1_HUMAN (swissprot)	Y783	DTGENPIyKSAVTTV	1.05377
Shc PTB	Phosphotyrosine binding group	0.5099	0.00422353	ITB4_HUMAN (swissprot)	Y1596	DLLPNHSyVFRVRAQ	0.82425
Shc PTB	Phosphotyrosine binding group	0.5134	0.00448344	ITB5_HUMAN (swissprot)	Y774	EMASNPLyRKPISTH	2.77335
Shc PTB	Phosphotyrosine binding group	0.495	0.00311709	ITB6_HUMAN (swissprot)	Y762	QTGTNPLyRGSTSTF	1.18939
Shc PTB	Phosphotyrosine binding group	0.5501	0.00940652	ITB7_HUMAN (swissprot)	Y778	KQDSNPLyKSAITTT	1.23973
Shc PTB	Phosphotyrosine binding group	0.5136	0.00449829	FYN_HUMAN (swissprot)	Y213	RKLDNGGyYITTRAQ	0.557441
Shc PTB	Phosphotyrosine binding group	0.5111	0.00431264	CAN2_HUMAN (swissprot)	Y387	TFWMNPQyLIKLEEE	1.11167
Protein Kinase A	Basophilic serine/threonine kinase	0.3323	0.00203852	ITA1_HUMAN (swissprot)	T1058	TDHLKRGtILDCNTC	0.61887
Protein Kinase A	Basophilic serine/threonine kinase	0.458	0.00876766	ITA2_HUMAN (swissprot)	T824	SNQNKRLtFSVTLKN	0.460108
Protein Kinase A	Basophilic serine/threonine kinase	0.3204	0.00168932	ITA4_HUMAN (swissprot)	S1021	QEENRRDsWSYINSK	2.21785
Protein Kinase A	Basophilic serine/threonine kinase	0.4172	0.00598148	ITA6_HUMAN (swissprot)	S570	AEKERRKsGLSSRVQ	1.31564
Protein Kinase A	Basophilic serine/threonine kinase	0.4038	0.0052016	ITA6_HUMAN (swissprot)	S955	IDDNRKFsLFAERKY	0.383665
Protein Kinase A	Basophilic serine/threonine kinase	0.4332	0.00696812	ITA9_HUMAN (swissprot)	T98	TNPDRRCtELDMARG	0.828194
Protein Kinase A	Basophilic serine/threonine kinase	0.3789	0.00385118	ITA9_HUMAN (swissprot)	T245	VIMNRRYtYLGYAVT	1.29796
Protein Kinase A	Basophilic serine/threonine kinase	0.4664	0.0094736	ITA9_HUMAN (swissprot)	T288	RADRRSGtLIKIFQA	0.507079
Protein Kinase A	Basophilic serine/threonine kinase	0.2911	0.00100308	ITB4_HUMAN (swissprot)	T1389	ELDLRRVtWRLPPEL	0.816565
Protein Kinase A	Basophilic serine/threonine kinase	0.4632	0.0091774	SDC4_HUMAN (swissprot)	S117	EVIPKRIsPVEESED	0.838053
Protein Kinase A	Basophilic serine/threonine kinase	0.4034	0.00517859	SHPS1_HUMAN (swissprot)	S128	CVKFRKGsPDDVEFK	2.62102
Protein Kinase A	Basophilic serine/threonine kinase	0.4504	0.00818194	TLN1_HUMAN (swissprot)	T150	GTLRKDKtLLRDEKK	1.47133
Protein Kinase A	Basophilic serine/threonine kinase	0.472	0.00999194	FLNA_HUMAN (swissprot)	S2152	TRRRRAPsVANVGSH	0.600713
Protein Kinase A	Basophilic serine/threonine kinase	0.2918	0.00101595	FLNA_HUMAN (swissprot)	T2336	SGDARRLtVSSLQES	0.712071
Protein Kinase A	Basophilic serine/threonine kinase	0.2957	0.00108765	TENS1_HUMAN (swissprot)	T1335	TPEDRRPtLSRQSSA	2.16817
Protein Kinase A	Basophilic serine/threonine kinase	0.2877	0.000940567	TENS1_HUMAN (swissprot)	S1393	LPEKRRMsVGDRAGS	0.730163
Protein Kinase A	Basophilic serine/threonine kinase	0.4413	0.00752219	FAK1_HUMAN (swissprot)	S517	FLQVRKYsLDLASLI	1.09299
Protein Kinase A	Basophilic serine/threonine kinase	0.3861	0.00422636	FAK1_HUMAN (swissprot)	T600	SINFRRFtSASDVWM	1.01767
Protein Kinase A	Basophilic serine/threonine kinase	0.3406	0.00230805	PAXI_HUMAN (swissprot)	S533	HYHERRGsLCSGCQK	0.352645
Protein Kinase A	Basophilic serine/threonine kinase	0.4516	0.00827442	VASP_HUMAN (swissprot)	S157	EHIERRVsNAGGPPA	0.745374
Protein Kinase A	Basophilic serine/threonine kinase	0.4387	0.00734434	VASP_HUMAN (swissprot)	S239	GAKLRKVsKQEEASG	2.7342
Protein Kinase A	Basophilic serine/threonine kinase	0.4522	0.00832066	VASP_HUMAN (swissprot)	T278	LARRRKAtQVGEKTP	0.849966
Protein Kinase A	Basophilic serine/threonine kinase	0.2796	0.000795233	VASP_HUMAN (swissprot)	S379	QELRKRGsP******	3.91248
Protein Kinase A	Basophilic serine/threonine kinase	0.3766	0.00374767	SRBS1_HUMAN (swissprot)	S259	PEDLRRVsEPDLTGA	1.99654
Protein Kinase A	Basophilic serine/threonine kinase	0.4466	0.00788908	SRBS1_HUMAN (swissprot)	S325	REQQKRLsSLSDPVS	0.734677
Protein Kinase A	Basophilic serine/threonine kinase	0.4252	0.00645901	SRBS1_HUMAN (swissprot)	T762	DIAARRHtGVIPTHH	0.453838
Protein Kinase A	Basophilic serine/threonine kinase	0.4522	0.00832066	SRBS1_HUMAN (swissprot)	S791	DDTAKRKsGSEMRPA	2.76284
Protein Kinase A	Basophilic serine/threonine kinase	0.3752	0.00368467	SRBS1_HUMAN (swissprot)	T1223	QAQQRRVtPDRSQTS	2.43168
Protein Kinase A	Basophilic serine/threonine kinase	0.4132	0.00574271	ASAP1_HUMAN (swissprot)	S348	VWQRRKCsVKNGILT	0.816076
Protein Kinase A	Basophilic serine/threonine kinase	0.4474	0.00795073	ASAP1_HUMAN (swissprot)	T837	PPPGHKRtLSDPPSP	2.39092
Protein Kinase A	Basophilic serine/threonine kinase	0.369	0.00340565	PAK1_HUMAN (swissprot)	T423	PEQSKRStMVGTPYW	0.631005
Protein Kinase A	Basophilic serine/threonine kinase	0.4412	0.00751535	AKT1_HUMAN (swissprot)	T146	AKPKHRVtMNEFEYL	1.37608
Protein Kinase A	Basophilic serine/threonine kinase	0.4222	0.00627994	PK3CA_HUMAN (swissprot)	T229	AEAIRKKtRSMLLSS	3.43584
Protein Kinase A	Basophilic serine/threonine kinase	0.448	0.00799698	PK3CA_HUMAN (swissprot)	S312	PSYSRRIsTATPYMN	0.887198
Protein Kinase A	Basophilic serine/threonine kinase	0.2143	0.00013127	SRC_HUMAN (swissprot)	S17	DASQRRRsLEPAENV	2.6018
Protein Kinase A	Basophilic serine/threonine kinase	0.3739	0.00362617	SRC_HUMAN (swissprot)	S161	GKITRREsERLLLNA	2.91402
Protein Kinase A	Basophilic serine/threonine kinase	0.4442	0.00772056	BCAR1_HUMAN (swissprot)	S428	PAEGKRLsASSTGST	0.899979
Protein Kinase A	Basophilic serine/threonine kinase	0.4237	0.00636947	CAN2_HUMAN (swissprot)	T79	GIEWKRPtEICADPQ	0.651819
Protein Kinase A	Basophilic serine/threonine kinase	0.429	0.00668584	CAN2_HUMAN (swissprot)	S369	DGNWRRGsTAGGCRN	0.858868
Protein Kinase A	Basophilic serine/threonine kinase	0.2887	0.000958953	KPCA_HUMAN (swissprot)	S241	SDKDRRLsVEIWDWD	0.446962
PLK1 Kinase	Acidophilic serine/threonine kinase group	0.3297	0.00781004	ITA1_HUMAN (swissprot)	T420	IIIPRNTtFNVESTK	0.855521
PLK1 Kinase	Acidophilic serine/threonine kinase group	0.2406	0.00100346	ITA1_HUMAN (swissprot)	T714	KLKSKEDtIYEADLQ	1.81948
PLK1 Kinase	Acidophilic serine/threonine kinase group	0.2866	0.00332052	ITA1_HUMAN (swissprot)	S819	EKCISDLsLHVATTE	0.352271
PLK1 Kinase	Acidophilic serine/threonine kinase group	0.3067	0.00511836	ITA1_HUMAN (swissprot)	S842	QNDKFNVsLTVKNTK	0.336259
PLK1 Kinase	Acidophilic serine/threonine kinase group	0.2554	0.0015637	ITA1_HUMAN (swissprot)	S910	ILFQFNTsYLMENVT	0.946507
PLK1 Kinase	Acidophilic serine/threonine kinase group	0.3015	0.0045981	ITA1_HUMAN (swissprot)	T917	SYLMENVtIYLSATS	0.371322
PLK1 Kinase	Acidophilic serine/threonine kinase group	0.2533	0.00147319	ITA1_HUMAN (swissprot)	T1104	YFSSLNLtIRGELRS	0.61887
PLK1 Kinase	Acidophilic serine/threonine kinase group	0.2919	0.00374017	ITA2_HUMAN (swissprot)	S637	GDSITDVsIGAFGQV	0.266766
PLK1 Kinase	Acidophilic serine/threonine kinase group	0.3393	0.00918333	ITA3_HUMAN (swissprot)	T267	ILHPKNItIVTGAPR	0.290706
PLK1 Kinase	Acidophilic serine/threonine kinase group	0.2464	0.00118648	ITA3_HUMAN (swissprot)	T699	GACQANEtIFCELGN	0.311226
PLK1 Kinase	Acidophilic serine/threonine kinase group	0.2945	0.00396194	ITA3_HUMAN (swissprot)	T859	LINPLNLtLSDPGDR	0.840648
PLK1 Kinase	Acidophilic serine/threonine kinase group	0.3096	0.00541392	ITA3_HUMAN (swissprot)	T937	KARVWNStFIEDYRD	0.778066
PLK1 Kinase	Acidophilic serine/threonine kinase group	0.3305	0.00792344	ITA4_HUMAN (swissprot)	S662	KTLMLNVsLFNAGDD	0.45395
PLK1 Kinase	Acidophilic serine/threonine kinase group	0.337	0.00885404	ITA4_HUMAN (swissprot)	S743	SRAEEDLsITVHATC	0.317578
PLK1 Kinase	Acidophilic serine/threonine kinase group	0.3141	0.00591887	ITA4_HUMAN (swissprot)	T808	MVEKMNLtFHVINTG	0.398338
PLK1 Kinase	Acidophilic serine/threonine kinase group	0.3103	0.00549247	ITA5_HUMAN (swissprot)	S124	GSRLLESsLSSSEGE	1.05561
PLK1 Kinase	Acidophilic serine/threonine kinase group	0.3425	0.0096971	ITA5_HUMAN (swissprot)	S270	ASSIYDDsYLGYSVA	1.09524
PLK1 Kinase	Acidophilic serine/threonine kinase group	0.3202	0.00661352	ITA5_HUMAN (swissprot)	T677	DKNALNLtFHAQNVG	0.542182
PLK1 Kinase	Acidophilic serine/threonine kinase group	0.3349	0.00855339	ITA6_HUMAN (swissprot)	T225	RVEQKNNtFFDMNIF	1.15495
PLK1 Kinase	Acidophilic serine/threonine kinase group	0.3097	0.00542514	ITA6_HUMAN (swissprot)	T314	IVSKDEItFVSGAPR	0.345807
PLK1 Kinase	Acidophilic serine/threonine kinase group	0.2381	0.000924577	ITA6_HUMAN (swissprot)	T789	FKRNSNVtFYLVLST	0.458692
PLK1 Kinase	Acidophilic serine/threonine kinase group	0.2774	0.00270039	ITA6_HUMAN (swissprot)	T800	VLSTTEVtFDTPDLD	0.887207
PLK1 Kinase	Acidophilic serine/threonine kinase group	0.3005	0.00449805	ITA6_HUMAN (swissprot)	T999	RSRLWNStFLEEYSK	0.915372
PLK1 Kinase	Acidophilic serine/threonine kinase group	0.3005	0.00449805	ITA7_HUMAN (swissprot)	T1027	WGRLWNStFLEEYSA	0.915372
PLK1 Kinase	Acidophilic serine/threonine kinase group	0.3408	0.00941479	ITA8_HUMAN (swissprot)	T307	IINSTDMtFIQNFTG	0.574572
PLK1 Kinase	Acidophilic serine/threonine kinase group	0.3163	0.00616574	ITA8_HUMAN (swissprot)	S607	INISLNYsLDESTFK	1.91668
PLK1 Kinase	Acidophilic serine/threonine kinase group	0.2856	0.00325189	ITA8_HUMAN (swissprot)	S755	RLEKTNMsINFDLQI	0.514476
PLK1 Kinase	Acidophilic serine/threonine kinase group	0.3015	0.0045981	ITA8_HUMAN (swissprot)	S1007	IWATPNVsFSIPLWV	0.309639
PLK1 Kinase	Acidophilic serine/threonine kinase group	0.3007	0.00451806	ITA9_HUMAN (swissprot)	S468	PVITVDVsIFLPGSI	0.190547
PLK1 Kinase	Acidophilic serine/threonine kinase group	0.2695	0.0022643	ITA9_HUMAN (swissprot)	S660	KNISLNIsISNLGDD	0.563985
PLK1 Kinase	Acidophilic serine/threonine kinase group	0.3245	0.0071551	ITA9_HUMAN (swissprot)	S674	DAYDANVsFNVSREL	0.408555
PLK1 Kinase	Acidophilic serine/threonine kinase group	0.3193	0.00650237	ITA9_HUMAN (swissprot)	S728	FSVIFDTsHLSGEEE	1.11308
PLK1 Kinase	Acidophilic serine/threonine kinase group	0.2837	0.00312149	ITA9_HUMAN (swissprot)	T758	SESLHDNtLVLMVPL	0.46559
PLK1 Kinase	Acidophilic serine/threonine kinase group	0.282	0.00300482	ITA9_HUMAN (swissprot)	S772	LMHEVDTsITGIMSP	0.741015
PLK1 Kinase	Acidophilic serine/threonine kinase group	0.3056	0.00500831	ITAV_HUMAN (swissprot)	S250	AQAIFDDsYLGYSVA	1.09524
PLK1 Kinase	Acidophilic serine/threonine kinase group	0.3086	0.00530846	ITAV_HUMAN (swissprot)	T556	PSHSKNMtISRGGLM	1.00566
PLK1 Kinase	Acidophilic serine/threonine kinase group	0.3092	0.00536904	ITAV_HUMAN (swissprot)	T975	IEDITNStLVTTNVT	0.653837
PLK1 Kinase	Acidophilic serine/threonine kinase group	0.3178	0.00633405	ITB1_HUMAN (swissprot)	T52	CGWCTNStFLQEGMP	0.915372
PLK1 Kinase	Acidophilic serine/threonine kinase group	0.3396	0.00922629	ITB1_HUMAN (swissprot)	S152	LYYLMDLsYSMKDDL	0.8789
PLK1 Kinase	Acidophilic serine/threonine kinase group	0.3104	0.00550369	ITB1_HUMAN (swissprot)	S419	GRKCSNIsIGDEVQF	0.416481
PLK1 Kinase	Acidophilic serine/threonine kinase group	0.3118	0.00566079	ITB1_HUMAN (swissprot)	S429	DEVQFEIsITSNKCP	0.505446
PLK1 Kinase	Acidophilic serine/threonine kinase group	0.3439	0.00992959	ITB1_HUMAN (swissprot)	S597	CDCSLDTsTCEASNG	0.991653
PLK1 Kinase	Acidophilic serine/threonine kinase group	0.3094	0.00539148	ITB4_HUMAN (swissprot)	S329	IFAVTNYsYSYYEKL	2.64402
PLK1 Kinase	Acidophilic serine/threonine kinase group	0.3232	0.00699137	ITB4_HUMAN (swissprot)	T681	RDEDDDCtYSYTMEG	0.974114
PLK1 Kinase	Acidophilic serine/threonine kinase group	0.2929	0.00382547	ITB4_HUMAN (swissprot)	T882	AGKKQDHtIVDTVLM	0.652989
PLK1 Kinase	Acidophilic serine/threonine kinase group	0.272	0.0024023	ITB4_HUMAN (swissprot)	S1111	DPDELDRsFTSQMLS	1.68227
PLK1 Kinase	Acidophilic serine/threonine kinase group	0.3318	0.00810956	ITB6_HUMAN (swissprot)	S302	LDSKNEYsMSTVLEY	1.59504
PLK1 Kinase	Acidophilic serine/threonine kinase group	0.3015	0.0045981	ITB6_HUMAN (swissprot)	S389	DTEGLNLsFTAICNN	0.533967
PLK1 Kinase	Acidophilic serine/threonine kinase group	0.3396	0.00922629	ITB7_HUMAN (swissprot)	S161	LYYLMDLsYSMKDDL	0.8789
PLK1 Kinase	Acidophilic serine/threonine kinase group	0.2319	0.00075691	ITB7_HUMAN (swissprot)	T291	LVFTSDDtFHTAGDG	1.56845
PLK1 Kinase	Acidophilic serine/threonine kinase group	0.3291	0.00773447	SDC4_HUMAN (swissprot)	S72	DLDDLEDsMIGPEVV	0.60975
PLK1 Kinase	Acidophilic serine/threonine kinase group	0.3305	0.00792344	SHPS1_HUMAN (swissprot)	T428	TQDTNDItYADLNLP	1.02346
PLK1 Kinase	Acidophilic serine/threonine kinase group	0.2548	0.00153784	SHPS1_HUMAN (swissprot)	T467	PQPASEDtLTYADLD	1.7838
PLK1 Kinase	Acidophilic serine/threonine kinase group	0.3012	0.00456808	TLN1_HUMAN (swissprot)	S1388	VQPINDMsYFGCLDS	0.681485
PLK1 Kinase	Acidophilic serine/threonine kinase group	0.1827	0.0001433	TLN1_HUMAN (swissprot)	T1995	IIADLDTtIMFATAG	0.47881
PLK1 Kinase	Acidophilic serine/threonine kinase group	0.328	0.00759592	FLNA_HUMAN (swissprot)	T341	ANNDKNRtFSVWYVP	0.931718
PLK1 Kinase	Acidophilic serine/threonine kinase group	0.3236	0.00704175	FLNA_HUMAN (swissprot)	T932	IIDHHDNtYTVKYTP	1.54809
PLK1 Kinase	Acidophilic serine/threonine kinase group	0.3165	0.00618818	FLNA_HUMAN (swissprot)	T1334	GLHSVDVtYDGSPVP	1.06154
PLK1 Kinase	Acidophilic serine/threonine kinase group	0.3427	0.00973031	FLNA_HUMAN (swissprot)	T1427	GTYSLNVtYGGHQVP	0.629063
PLK1 Kinase	Acidophilic serine/threonine kinase group	0.3022	0.00466813	FLNA_HUMAN (swissprot)	S2526	PRLVSNHsLHETSSV	1.35625
PLK1 Kinase	Acidophilic serine/threonine kinase group	0.3156	0.00608719	FAK1_HUMAN (swissprot)	T406	EIIDEEDtYTMPSTR	2.14056
PLK1 Kinase	Acidophilic serine/threonine kinase group	0.3379	0.0089829	FAK1_HUMAN (swissprot)	T575	SRYMEDStYYKASKG	3.63419
PLK1 Kinase	Acidophilic serine/threonine kinase group	0.3374	0.00891131	PAXI_HUMAN (swissprot)	T435	VVTALDRtWHPEHFF	2.39329
PLK1 Kinase	Acidophilic serine/threonine kinase group	0.2567	0.00161973	PARVA_HUMAN (swissprot)	S328	EQKVLNVsFAFELMQ	0.288342
PLK1 Kinase	Acidophilic serine/threonine kinase group	0.3092	0.00536904	PALLD_HUMAN (swissprot)	T1074	LDDDGNYtIMAANPQ	0.606493
PLK1 Kinase	Acidophilic serine/threonine kinase group	0.25	0.00133097	SRBS1_HUMAN (swissprot)	S377	TQDLSDVsMDEVGIP	1.08948
PLK1 Kinase	Acidophilic serine/threonine kinase group	0.293	0.003834	SRBS1_HUMAN (swissprot)	S484	PRSKSEMsYIDGEKV	0.965437
PLK1 Kinase	Acidophilic serine/threonine kinase group	0.2729	0.00245199	ASAP1_HUMAN (swissprot)	T393	DLISHNRtYHFQAED	1.99722
PLK1 Kinase	Acidophilic serine/threonine kinase group	0.2784	0.00275775	SDCB1_HUMAN (swissprot)	T198	RDRPFERtITMHKDS	1.12313
PLK1 Kinase	Acidophilic serine/threonine kinase group	0.2215	0.000535429	PAK1_HUMAN (swissprot)	T84	LPSDFEHtIHVGFDA	0.551772
PLK1 Kinase	Acidophilic serine/threonine kinase group	0.3277	0.00755814	KPCA_HUMAN (swissprot)	S226	LNPQWNEsFTFKLKP	0.961141
PLCg SH3	Src homology 3 group	0.5532	0.00919009	ITB1_HUMAN (swissprot)	P685	KLPQPVQpDPVSHCK	0.87298
PLCg SH3	Src homology 3 group	0.5538	0.00927689	FAK1_HUMAN (swissprot)	P645	GERLPMPpNCPPTLY	0.750578
PLCg SH3	Src homology 3 group	0.4234	0.00060744	PAXI_HUMAN (swissprot)	P51	AVPPPVPpPPSSEAL	1.30309
PLCg SH3	Src homology 3 group	0.4411	0.0010419	PAXI_HUMAN (swissprot)	P328	SSPPGGPpKPGSQLD	1.6594
PLCg SH3	Src homology 3 group	0.5115	0.00409806	VASP_HUMAN (swissprot)	P174	AGGPPPPpGPPPPPG	2.00475
PLCg SH3	Src homology 3 group	0.5131	0.00418848	VASP_HUMAN (swissprot)	P177	PPPPPGPpPPPGPPP	2.00475
PLCg SH3	Src homology 3 group	0.5218	0.00468017	VASP_HUMAN (swissprot)	P180	PPGPPPPpGPPPPPG	2.00475
PLCg SH3	Src homology 3 group	0.4818	0.00241955	VASP_HUMAN (swissprot)	P182	GPPPPPGpPPPPGLP	2.00475
PLCg SH3	Src homology 3 group	0.5131	0.00418848	VASP_HUMAN (swissprot)	P183	PPPPPGPpPPPGLPP	2.00475
PLCg SH3	Src homology 3 group	0.5466	0.00823522	VASP_HUMAN (swissprot)	P209	GGPPPAPpLPAAQGP	0.713097
PLCg SH3	Src homology 3 group	0.4632	0.00158436	ASAP1_HUMAN (swissprot)	P832	KRPPPPPpGHKRTLS	2.28167
PLCg SH3	Src homology 3 group	0.4457	0.00115481	PAK1_HUMAN (swissprot)	P192	TPPPVIApRPEHTKS	1.31617
PLCg N-terminal SH2	Src homology 2 group	0.3539	0.00623915	ITA6_HUMAN (swissprot)	Y1009	EEYSKLNyLDILMRA	0.477414
PLCg N-terminal SH2	Src homology 2 group	0.3788	0.00976926	ITA8_HUMAN (swissprot)	Y361	PREVGQIyLYLQVSS	0.464535
PLCg N-terminal SH2	Src homology 2 group	0.3659	0.00760989	ITB5_HUMAN (swissprot)	Y696	DCVMMFTyVELPSGK	0.475681
PLCg N-terminal SH2	Src homology 2 group	0.3459	0.00547942	ITB8_HUMAN (swissprot)	Y199	VDKTVSPyISIHPER	0.489973
PLCg N-terminal SH2	Src homology 2 group	0.3211	0.00344197	TLN1_HUMAN (swissprot)	Y2247	GRECANGyLELLDHV	0.698959
PLCg N-terminal SH2	Src homology 2 group	0.3786	0.00973578	FLNA_HUMAN (swissprot)	Y1221	DGTHTITyIPLCPGA	0.324716
PLCg N-terminal SH2	Src homology 2 group	0.3448	0.00537496	FLNA_HUMAN (swissprot)	Y1924	DGTCSVSyLPVLPGD	0.338038
PLCg N-terminal SH2	Src homology 2 group	0.3799	0.00995339	ACTN1_HUMAN (swissprot)	Y215	AFDVAEKyLDIPKML	1.20061
PLCg N-terminal SH2	Src homology 2 group	0.3182	0.00327327	PTPRA_HUMAN (swissprot)	Y271	ENKEKNRyVNILPYD	1.02047
PLCg N-terminal SH2	Src homology 2 group	0.3388	0.00480516	FAK1_HUMAN (swissprot)	Y397	SVSETDDyAEIIDEE	1.22815
PLCg N-terminal SH2	Src homology 2 group	0.3252	0.00368048	VINEX_HUMAN (swissprot)	Y433	LGIFPANyVEVLPAD	0.577952
PLCg N-terminal SH2	Src homology 2 group	0.2774	0.00136087	SRBS1_HUMAN (swissprot)	Y846	VGIFPRTyIELLPPA	1.01617
PLCg C-terminal SH2	Src homology 2 group	0.4259	0.00906285	ITA5_HUMAN (swissprot)	Y302	KGNLTYGyVTILNGS	0.418081
PLCg C-terminal SH2	Src homology 2 group	0.4287	0.00969951	ITB8_HUMAN (swissprot)	Y447	DVTGGKNyAIIKPIG	0.595301
PLCg C-terminal SH2	Src homology 2 group	0.3468	0.00134381	PTPRA_HUMAN (swissprot)	Y271	ENKEKNRyVNILPYD	1.02047
PLCg C-terminal SH2	Src homology 2 group	0.4257	0.00901737	ZYX_HUMAN (swissprot)	Y172	KARVSSGyVPPPVAT	0.845096
PLCg C-terminal SH2	Src homology 2 group	0.3975	0.00458204	PK3CA_HUMAN (swissprot)	Y165	SPHSRAMyVYPPNVE	0.645566
PLCg C-terminal SH2	Src homology 2 group	0.3412	0.00116206	BCAR1_HUMAN (swissprot)	Y115	QPQPDSVyLVPTPSK	0.338038
PLCg C-terminal SH2	Src homology 2 group	0.392	0.00404718	BCAR1_HUMAN (swissprot)	Y362	SPPAEDVyDVPPPAP	0.853027
PLCg C-terminal SH2	Src homology 2 group	0.3262	0.00085249	BCAR1_HUMAN (swissprot)	Y410	GVVDSGVyAVPPPAE	0.305795
PLCg C-terminal SH2	Src homology 2 group	0.4033	0.00514607	CAN2_HUMAN (swissprot)	Y482	FKLPPGEyILVPSTF	0.264051
PLCg C-terminal SH2	Src homology 2 group	0.3893	0.00378462	KPCA_HUMAN (swissprot)	Y286	NQEEGEYyNVPIPEG	1.86753
PKC zeta	Basophilic serine/threonine kinase	0.4505	0.00491526	ITA6_HUMAN (swissprot)	S42	RKYGDPGsLFGFSLA	0.332108
PKC zeta	Basophilic serine/threonine kinase	0.459	0.00570683	ITA9_HUMAN (swissprot)	T288	RADRRSGtLIKIFQA	0.507079
PKC zeta	Basophilic serine/threonine kinase	0.4712	0.00684297	ITB4_HUMAN (swissprot)	S1084	RRFHVQLsNPKFGAH	2.26508
PKC zeta	Basophilic serine/threonine kinase	0.4677	0.00651703	FAK1_HUMAN (swissprot)	S239	ANLNREEsILKFFEI	1.06487
PKC zeta	Basophilic serine/threonine kinase	0.4812	0.00879602	ILK_HUMAN (swissprot)	T181	RTRPRNGtLNKHSGI	1.50541
PKC zeta	Basophilic serine/threonine kinase	0.4498	0.00485007	SRBS1_HUMAN (swissprot)	T397	RSKDWYKtMFKQIHK	1.77606
PKC zeta	Basophilic serine/threonine kinase	0.4454	0.00444031	AKT1_HUMAN (swissprot)	T34	FLLKNDGtFIGYKER	0.328327
PKC zeta	Basophilic serine/threonine kinase	0.4505	0.00491526	CAN2_HUMAN (swissprot)	T671	RCLVRLEtLFKIFKQ	0.674576
PKC zeta	Basophilic serine/threonine kinase	0.4232	0.00237291	KPCA_HUMAN (swissprot)	T48	ARFFKQPtFCSHCTD	0.550918
PKC mu	Basophilic serine/threonine kinase	0.4433	0.00881148	ITA4_HUMAN (swissprot)	S592	PHVISKRsTEEFPPL	5.20688
PKC mu	Basophilic serine/threonine kinase	0.4426	0.00861631	ITB4_HUMAN (swissprot)	T164	ARVLSQLtSDYTIGF	1.65639
PKC mu	Basophilic serine/threonine kinase	0.4225	0.00570205	TLN1_HUMAN (swissprot)	S688	ALVLKAKsVAQRTED	0.805697
PKC mu	Basophilic serine/threonine kinase	0.4335	0.00685799	TLN1_HUMAN (swissprot)	T2030	AKVLVEDtKVLVQNA	1.17087
PKC mu	Basophilic serine/threonine kinase	0.4419	0.00842114	FLNA_HUMAN (swissprot)	S2526	PRLVSNHsLHETSSV	1.35625
PKC mu	Basophilic serine/threonine kinase	0.4218	0.00562849	TENS1_HUMAN (swissprot)	S1558	SALVYQHsIIPLALP	0.549881
PKC mu	Basophilic serine/threonine kinase	0.4446	0.00917394	PTPRA_HUMAN (swissprot)	S60	TSSLTSLsVAPTFSP	0.393513
PKC mu	Basophilic serine/threonine kinase	0.411	0.00449356	FAK1_HUMAN (swissprot)	S239	ANLNREEsILKFFEI	1.06487
PKC mu	Basophilic serine/threonine kinase	0.4277	0.00624849	ILK_HUMAN (swissprot)	T285	YNVLHEGtNFVVDQS	0.60837
PKC mu	Basophilic serine/threonine kinase	0.4218	0.00562849	AKT1_HUMAN (swissprot)	T160	LKLLGKGtFGKVILV	1.12172
PKC mu	Basophilic serine/threonine kinase	0.4329	0.00679494	BCAR1_HUMAN (swissprot)	T326	GPLLREEtYDVPPAF	1.92651
PKC mu	Basophilic serine/threonine kinase	0.4329	0.00679494	BCAR1_HUMAN (swissprot)	T608	ASLLFRRtKATAPGP	3.69934
PKC epsilon	Basophilic serine/threonine kinase	0.326	0.000322162	ITA1_HUMAN (swissprot)	T714	KLKSKEDtIYEADLQ	1.81948
PKC epsilon	Basophilic serine/threonine kinase	0.3955	0.00303016	ITA1_HUMAN (swissprot)	S735	SLRQISRsFFSGTQE	0.809981
PKC epsilon	Basophilic serine/threonine kinase	0.4185	0.00576033	ITA1_HUMAN (swissprot)	S994	YLIRKSGsFPMPELK	0.539675
PKC epsilon	Basophilic serine/threonine kinase	0.4311	0.0077033	ITA1_HUMAN (swissprot)	T1092	SLILWKPtFIKSYFS	1.24149
PKC epsilon	Basophilic serine/threonine kinase	0.3979	0.00322977	ITA4_HUMAN (swissprot)	T615	EKDIMKKtINFARFC	1.34081
PKC epsilon	Basophilic serine/threonine kinase	0.4311	0.0077033	ITA5_HUMAN (swissprot)	S124	GSRLLESsLSSSEGE	1.05561
PKC epsilon	Basophilic serine/threonine kinase	0.4142	0.00517079	ITA5_HUMAN (swissprot)	T760	HLRDTKKtIQFDFQI	1.39047
PKC epsilon	Basophilic serine/threonine kinase	0.4415	0.00964232	ITA7_HUMAN (swissprot)	S505	YPDLLVGsLADTAVL	0.313842
PKC epsilon	Basophilic serine/threonine kinase	0.4415	0.00964232	ITA8_HUMAN (swissprot)	S368	YLYLQVSsLLFRDPQ	0.179892
PKC epsilon	Basophilic serine/threonine kinase	0.3526	0.000797229	ITA8_HUMAN (swissprot)	T612	NYSLDEStFKEGLEV	2.30199
PKC epsilon	Basophilic serine/threonine kinase	0.4082	0.00442444	ITAV_HUMAN (swissprot)	S47	EYSGPEGsYFGFAVD	0.706725
PKC epsilon	Basophilic serine/threonine kinase	0.4185	0.00576033	ITAV_HUMAN (swissprot)	S955	YSLKSSAsFNVIEFP	0.446244
PKC epsilon	Basophilic serine/threonine kinase	0.4408	0.00950564	ITB4_HUMAN (swissprot)	S672	EEVVVRCsFRDEDDD	0.913232
PKC epsilon	Basophilic serine/threonine kinase	0.4149	0.00525786	SHPS1_HUMAN (swissprot)	S492	PAPKPEPsFSEYASV	1.65276
PKC epsilon	Basophilic serine/threonine kinase	0.4045	0.00396419	TLN1_HUMAN (swissprot)	S22	KTMQFEPsTMVYDAC	0.871783
PKC epsilon	Basophilic serine/threonine kinase	0.4149	0.00525786	TLN1_HUMAN (swissprot)	T1767	ALLDQTKtLAESALQ	1.37726
PKC epsilon	Basophilic serine/threonine kinase	0.4311	0.0077033	FLNA_HUMAN (swissprot)	T790	GLKAHEPtYFTVDCA	1.73425
PKC epsilon	Basophilic serine/threonine kinase	0.3423	0.000565629	ACTN1_HUMAN (swissprot)	S404	EKFRQKAsIHEAWTD	1.02493
PKC epsilon	Basophilic serine/threonine kinase	0.4149	0.00525786	TENS1_HUMAN (swissprot)	S374	AKVKKKDsLHGSTGA	1.13901
PKC epsilon	Basophilic serine/threonine kinase	0.4311	0.0077033	TENS1_HUMAN (swissprot)	S621	SGMFRSQsFSEAEPQ	1.43239
PKC epsilon	Basophilic serine/threonine kinase	0.4371	0.00878317	FAK1_HUMAN (swissprot)	T678	ELKAQLStILEEEKA	0.365934
PKC epsilon	Basophilic serine/threonine kinase	0.3979	0.00322977	FAK1_HUMAN (swissprot)	S843	DVRLSRGsIDREDGS	1.36483
PKC epsilon	Basophilic serine/threonine kinase	0.4082	0.00442444	PAXI_HUMAN (swissprot)	T572	LKQLNKGtFKEQNDK	1.96302
PKC epsilon	Basophilic serine/threonine kinase	0.4275	0.00714817	VASP_HUMAN (swissprot)	S325	PRMKSSSsVTTSETQ	0.852612
PKC epsilon	Basophilic serine/threonine kinase	0.3586	0.000988384	SRBS1_HUMAN (swissprot)	S484	PRSKSEMsYIDGEKV	0.965437
PKC epsilon	Basophilic serine/threonine kinase	0.4245	0.00668555	SRBS1_HUMAN (swissprot)	S887	GDTQVEMsFRKGERI	1.78522
PKC epsilon	Basophilic serine/threonine kinase	0.4208	0.006115	ASAP1_HUMAN (swissprot)	T870	PSSSSKTtNKFEGLS	2.76049
PKC epsilon	Basophilic serine/threonine kinase	0.4245	0.00668555	PAK1_HUMAN (swissprot)	S144	SNSQKYMsFTDKSAE	0.993833
PKC epsilon	Basophilic serine/threonine kinase	0.4311	0.0077033	AKT1_HUMAN (swissprot)	T87	WTTVIERtFHVETPE	0.981091
PKC epsilon	Basophilic serine/threonine kinase	0.3919	0.00273075	AKT1_HUMAN (swissprot)	T146	AKPKHRVtMNEFEYL	1.37608
PKC epsilon	Basophilic serine/threonine kinase	0.3586	0.000988384	KPCA_HUMAN (swissprot)	T214	ESKQKTKtIRSTLNP	1.75629
PKC delta	Basophilic serine/threonine kinase	0.4028	0.00601156	ITA1_HUMAN (swissprot)	T335	KSIASEPtEKHFFNV	4.17394
PKC delta	Basophilic serine/threonine kinase	0.4183	0.00998199	ITA1_HUMAN (swissprot)	S735	SLRQISRsFFSGTQE	0.809981
PKC delta	Basophilic serine/threonine kinase	0.4143	0.00895736	ITA2_HUMAN (swissprot)	S265	YARKYAYsAASGGRR	0.664877
PKC delta	Basophilic serine/threonine kinase	0.4163	0.00946968	ITA5_HUMAN (swissprot)	T760	HLRDTKKtIQFDFQI	1.39047
PKC delta	Basophilic serine/threonine kinase	0.4128	0.00857313	ITA9_HUMAN (swissprot)	S302	ASGKKMGsYFGSSLC	0.403843
PKC delta	Basophilic serine/threonine kinase	0.4157	0.00931598	ITAV_HUMAN (swissprot)	S433	AARSMPPsFGYSMKG	0.985945
PKC delta	Basophilic serine/threonine kinase	0.3664	0.00237048	UROK_HUMAN (swissprot)	S204	YRRHRGGsVTYVCGG	0.504804
PKC delta	Basophilic serine/threonine kinase	0.4105	0.00798397	SHPS1_HUMAN (swissprot)	S59	TLRCTATsLIPVGPI	0.40024
PKC delta	Basophilic serine/threonine kinase	0.3906	0.00446428	FLNA_HUMAN (swissprot)	T790	GLKAHEPtYFTVDCA	1.73425
PKC delta	Basophilic serine/threonine kinase	0.397	0.00501801	FLNA_HUMAN (swissprot)	T1232	CPGAYTVtIKYGGQP	0.778172
PKC delta	Basophilic serine/threonine kinase	0.3542	0.00139418	FLNA_HUMAN (swissprot)	S2152	TRRRRAPsVANVGSH	0.600713
PKC delta	Basophilic serine/threonine kinase	0.4178	0.00985391	FLNA_HUMAN (swissprot)	S2339	ARRLTVSsLQESGLK	0.755545
PKC delta	Basophilic serine/threonine kinase	0.4005	0.0054224	TENS1_HUMAN (swissprot)	S374	AKVKKKDsLHGSTGA	1.13901
PKC delta	Basophilic serine/threonine kinase	0.4005	0.0054224	BCAR1_HUMAN (swissprot)	S687	KELLEKGsITRQGKS	1.20431
PKC delta	Basophilic serine/threonine kinase	0.3521	0.00134376	KPCA_HUMAN (swissprot)	T48	ARFFKQPtFCSHCTD	0.550918
PKC alpha/beta/gamma	Basophilic serine/threonine kinase	0.4498	0.0090805	ITA1_HUMAN (swissprot)	T750	RKVQRNItVRKSECT	1.12557
PKC alpha/beta/gamma	Basophilic serine/threonine kinase	0.3578	0.00119815	ITA2_HUMAN (swissprot)	T828	KRLTFSVtLKNKRES	0.906032
PKC alpha/beta/gamma	Basophilic serine/threonine kinase	0.4161	0.00458166	ITA6_HUMAN (swissprot)	T592	PKYTQELtLKRQKQK	1.52583
PKC alpha/beta/gamma	Basophilic serine/threonine kinase	0.4291	0.00604451	ITAV_HUMAN (swissprot)	S127	SHQWFGAsVRSKQDK	0.59814
PKC alpha/beta/gamma	Basophilic serine/threonine kinase	0.4317	0.00642585	ITB6_HUMAN (swissprot)	T773	TSTFKNVtYKHREKQ	1.74794
PKC alpha/beta/gamma	Basophilic serine/threonine kinase	0.4005	0.00317014	ITB8_HUMAN (swissprot)	T743	SVCTRAVtYRREKPE	1.49063
PKC alpha/beta/gamma	Basophilic serine/threonine kinase	0.3806	0.00205411	TLN1_HUMAN (swissprot)	T144	KKEEITGtLRKDKTL	1.52583
PKC alpha/beta/gamma	Basophilic serine/threonine kinase	0.4392	0.00752584	TLN1_HUMAN (swissprot)	T150	GTLRKDKtLLRDEKK	1.47133
PKC alpha/beta/gamma	Basophilic serine/threonine kinase	0.4333	0.00666051	TENS1_HUMAN (swissprot)	S176	FSGLLSGsIKMNNKP	0.565031
PKC alpha/beta/gamma	Basophilic serine/threonine kinase	0.4033	0.00342349	FAK1_HUMAN (swissprot)	T219	LDSVKAKtLRKLIQQ	2.15841
PKC alpha/beta/gamma	Basophilic serine/threonine kinase	0.4088	0.00392114	ILK_HUMAN (swissprot)	T172	KDTFWKGtTRTRPRN	2.6702
PKC alpha/beta/gamma	Basophilic serine/threonine kinase	0.4167	0.00463595	PARVA_HUMAN (swissprot)	T36	FLGKLGGtLARRKKA	0.528534
PKC alpha/beta/gamma	Basophilic serine/threonine kinase	0.4369	0.00718851	SRBS1_HUMAN (swissprot)	S506	PLPARSSsLKSSSER	1.21898
PKC alpha/beta/gamma	Basophilic serine/threonine kinase	0.4242	0.00532585	PK3CA_HUMAN (swissprot)	S408	RLCLSICsVKGRKGA	0.169509
PKC alpha/beta/gamma	Basophilic serine/threonine kinase	0.3627	0.0013378	FYN_HUMAN (swissprot)	T75	NSSSHTGtLRTRGGT	1.10111
PKC alpha/beta/gamma	Basophilic serine/threonine kinase	0.4444	0.0082885	SRC_HUMAN (swissprot)	S104	SRTETDLsFKKGERL	1.46475
PKC alpha/beta/gamma	Basophilic serine/threonine kinase	0.4329	0.00660184	BCAR1_HUMAN (swissprot)	S687	KELLEKGsITRQGKS	1.20431
PIP3-binding PH	Lipid binding group	0.6744	0.00473094	ITAV_HUMAN (swissprot)	F503	TALKVSCfNVRFCLK	0.346067
PIP3-binding PH	Lipid binding group	0.6903	0.00605493	ITB1_HUMAN (swissprot)	F443	PKKDSDSfKIRPLGF	1.21937
PIP3-binding PH	Lipid binding group	0.6555	0.00353059	ITB4_HUMAN (swissprot)	F757	NRGHMVGfKEDHYML	0.843027
PIP3-binding PH	Lipid binding group	0.7145	0.00870562	TENS1_HUMAN (swissprot)	F1656	TDNQRKLfFRRHYPL	1.08715
PIP3-binding PH	Lipid binding group	0.6749	0.00476269	VINEX_HUMAN (swissprot)	W146	SVDRPRDwYRRMFQQ	4.73753
PIP3-binding PH	Lipid binding group	0.0944	1.3998e-05	AKT1_HUMAN (swissprot)	W22	RGEYIKTwRPRYFLL	4.12535
PDK1 Binding	Kinase binding site group	0.5706	0.00580692	ITA1_HUMAN (swissprot)	T439	LASYLGYtVNSATAS	0.851856
PDK1 Binding	Kinase binding site group	0.5857	0.00744371	ITA1_HUMAN (swissprot)	E537	ALNQTRFeYQMSLEP	1.80759
PDK1 Binding	Kinase binding site group	0.5686	0.00559013	ITA2_HUMAN (swissprot)	S855	NLFFASFsLPVDGTE	0.337297
PDK1 Binding	Kinase binding site group	0.5781	0.00661989	ITA2_HUMAN (swissprot)	T1088	NGTFASStFQTVQLT	1.28548
PDK1 Binding	Kinase binding site group	0.5341	0.0026331	ITA3_HUMAN (swissprot)	S238	EWDLSEYsYKDPEDQ	4.36103
PDK1 Binding	Kinase binding site group	0.5848	0.00734615	ITA5_HUMAN (swissprot)	S63	PGSFFGFsVEFYRPG	0.292919
PDK1 Binding	Kinase binding site group	0.591	0.00803297	ITA5_HUMAN (swissprot)	D764	TKKTIQFdFQILSKN	0.603301
PDK1 Binding	Kinase binding site group	0.5561	0.00423518	ITA6_HUMAN (swissprot)	S300	MNSYLGFsLDSGKGI	0.485708
PDK1 Binding	Kinase binding site group	0.5644	0.00513487	ITA6_HUMAN (swissprot)	E543	LQVKSCFeYTANPAG	0.420845
PDK1 Binding	Kinase binding site group	0.5478	0.00360318	ITA6_HUMAN (swissprot)	S692	EGNQDKFsYLPIQKG	1.06263
PDK1 Binding	Kinase binding site group	0.5561	0.00423518	ITA7_HUMAN (swissprot)	S310	LNSYLGFsIDSGKGL	0.412851
PDK1 Binding	Kinase binding site group	0.594	0.00837105	ITA8_HUMAN (swissprot)	S185	FSAYAEFsPCRNSNA	0.747675
PDK1 Binding	Kinase binding site group	0.5425	0.00322789	ITA8_HUMAN (swissprot)	E349	APLFMEReFESNPRE	2.70543
PDK1 Binding	Kinase binding site group	0.5845	0.00731363	ITAV_HUMAN (swissprot)	E960	SASFNVIeFPYKNLP	0.433209
PDK1 Binding	Kinase binding site group	0.5644	0.00513487	ITB1_HUMAN (swissprot)	S218	QNCTSPFsYKNVLSL	2.15182
PDK1 Binding	Kinase binding site group	0.307	0.000466378	ITB1_HUMAN (swissprot)	T704	DDCWFYFtYSVNGNN	0.699364
PDK1 Binding	Kinase binding site group	0.5983	0.00885563	ITB1_HUMAN (swissprot)	S706	CWFYFTYsVNGNNEV	0.851856
PDK1 Binding	Kinase binding site group	0.5634	0.00502647	ITB4_HUMAN (swissprot)	D137	VDLYILMdFSNSMSD	0.605266
PDK1 Binding	Kinase binding site group	0.5496	0.00373063	ITB4_HUMAN (swissprot)	S202	PNSDPPFsFKNVISL	1.18917
PDK1 Binding	Kinase binding site group	0.5688	0.00561181	ITB4_HUMAN (swissprot)	D303	YTQYRTQdYPSVPTL	3.10573
PDK1 Binding	Kinase binding site group	0.6037	0.00946417	ITB4_HUMAN (swissprot)	E334	NYSYSYYeKLHTYFP	2.18673
PDK1 Binding	Kinase binding site group	0.6019	0.00926133	ITB4_HUMAN (swissprot)	S683	EDDDCTYsYTMEGDG	1.55414
PDK1 Binding	Kinase binding site group	0.5709	0.00583944	ITB4_HUMAN (swissprot)	E998	VVSFEQPeFSVSRGD	0.915372
PDK1 Binding	Kinase binding site group	0.5201	0.00173783	ITB5_HUMAN (swissprot)	S191	DKDISPFsYTAPRYQ	0.939386
PDK1 Binding	Kinase binding site group	0.5644	0.00513487	ITB5_HUMAN (swissprot)	T349	YMLYKNFtALIPGTT	0.279306
PDK1 Binding	Kinase binding site group	0.5781	0.00661989	ITB5_HUMAN (swissprot)	T786	STHTVDFtFNKFNKS	1.38309
PDK1 Binding	Kinase binding site group	0.5698	0.00572021	ITB6_HUMAN (swissprot)	T773	TSTFKNVtYKHREKQ	1.74794
PDK1 Binding	Kinase binding site group	0.5561	0.00423518	ITB7_HUMAN (swissprot)	D326	YSRSTEFdYPSVGQV	1.86344
PDK1 Binding	Kinase binding site group	0.5359	0.00276055	FLNA_HUMAN (swissprot)	T408	TTYFEIFtAGAGTGE	0.202755
PDK1 Binding	Kinase binding site group	0.5763	0.00642478	FLNA_HUMAN (swissprot)	T507	TADFKVYtKGAGSGE	0.769017
PDK1 Binding	Kinase binding site group	0.5543	0.00406343	FLNA_HUMAN (swissprot)	E541	GDGVYGFeYYPMVPG	1.29113
PDK1 Binding	Kinase binding site group	0.6037	0.00946417	FLNA_HUMAN (swissprot)	E1418	SVEYIPYeAGTYSLN	1.3874
PDK1 Binding	Kinase binding site group	0.59	0.00792028	FLNA_HUMAN (swissprot)	T1421	YIPYEAGtYSLNVTY	0.572578
PDK1 Binding	Kinase binding site group	0.5942	0.00839359	FLNA_HUMAN (swissprot)	E2067	GHTFEPAeFIIDTRD	0.263789
PDK1 Binding	Kinase binding site group	0.56	0.00465792	ACTN1_HUMAN (swissprot)	D759	RASFNHFdRDHSGTL	2.00698
PDK1 Binding	Kinase binding site group	0.5882	0.00771743	TENS1_HUMAN (swissprot)	E301	FPEYGKVeFVFSYGP	0.327844
PDK1 Binding	Kinase binding site group	0.5839	0.00724859	TENS1_HUMAN (swissprot)	S305	GKVEFVFsYGPEKIQ	0.473254
PDK1 Binding	Kinase binding site group	0.5942	0.00839359	TENS1_HUMAN (swissprot)	S343	WDSYDNFsGHRDDGM	1.1713
PDK1 Binding	Kinase binding site group	0.5698	0.00572021	TENS1_HUMAN (swissprot)	S621	SGMFRSQsFSEAEPQ	1.43239
PDK1 Binding	Kinase binding site group	0.1841	0.00026635	TENS1_HUMAN (swissprot)	D797	GRSYSPYdYQPCLAG	3.89069
PDK1 Binding	Kinase binding site group	0.5907	0.00799916	TENS1_HUMAN (swissprot)	D1148	GSSYSSPdYSLQHFS	1.37328
PDK1 Binding	Kinase binding site group	0.5085	0.00142773	TENS1_HUMAN (swissprot)	S1441	LPDFSKYsMPDNSPE	2.45923
PDK1 Binding	Kinase binding site group	0.5605	0.00471212	PTPRA_HUMAN (swissprot)	S299	DSDYINAsFINGYQE	0.525195
PDK1 Binding	Kinase binding site group	0.5921	0.00815693	PTPRA_HUMAN (swissprot)	S592	NTDYVNAsFIDGYRQ	0.525195
PDK1 Binding	Kinase binding site group	0.5305	0.00237819	FAK1_HUMAN (swissprot)	E44	LKVFHYFeSNSEPTT	1.61498
PDK1 Binding	Kinase binding site group	0.578	0.00660905	FAK1_HUMAN (swissprot)	T600	SINFRRFtSASDVWM	1.01767
PDK1 Binding	Kinase binding site group	0.5824	0.007086	PAXI_HUMAN (swissprot)	S32	LSEETPYsYPTGNHT	2.6018
PDK1 Binding	Kinase binding site group	0.567	0.0054167	PAXI_HUMAN (swissprot)	S119	GEEEHVYsFPNKQKS	0.798615
PDK1 Binding	Kinase binding site group	0.5965	0.00865278	PAXI_HUMAN (swissprot)	D408	GQPYCEKdYHNLFSP	4.71945
PDK1 Binding	Kinase binding site group	0.6069	0.00982479	ILK_HUMAN (swissprot)	S343	SMADVKFsFQCPGRM	0.427513
PDK1 Binding	Kinase binding site group	0.5654	0.00524326	CAV1_HUMAN (swissprot)	T93	KASFTTFtVTKYWFY	0.885381
PDK1 Binding	Kinase binding site group	0.6061	0.00973464	LIMS1_HUMAN (swissprot)	E54	EGLFYEFeGRKYCEH	2.30705
PDK1 Binding	Kinase binding site group	0.5435	0.0032987	LIMS1_HUMAN (swissprot)	D295	KNKFVEFdMKPVCKK	1.75631
PDK1 Binding	Kinase binding site group	0.5827	0.00711852	ZYX_HUMAN (swissprot)	T315	SPQPPSFtYAQQREK	1.05211
PDK1 Binding	Kinase binding site group	0.6004	0.00909229	PALLD_HUMAN (swissprot)	E1014	LKHYKIFeGMPVTFT	0.364808
PDK1 Binding	Kinase binding site group	0.5975	0.00876548	VINEX_HUMAN (swissprot)	D390	KAARLKFdFQAQSPK	1.00402
PDK1 Binding	Kinase binding site group	0.5763	0.00642478	VINEX_HUMAN (swissprot)	S570	SPRRTGFsFPTQEPR	0.50854
PDK1 Binding	Kinase binding site group	0.5773	0.00653318	SRBS1_HUMAN (swissprot)	S465	DLYSPRYsFSEDTKS	1.89411
PDK1 Binding	Kinase binding site group	0.554	0.00404219	SRBS1_HUMAN (swissprot)	E537	AEPKSIYeYQPGKSS	1.8291
PDK1 Binding	Kinase binding site group	0.5331	0.00256229	SRBS1_HUMAN (swissprot)	E575	YKFFSELeFGKPPPK	0.97139
PDK1 Binding	Kinase binding site group	0.5774	0.00654402	SRBS1_HUMAN (swissprot)	D721	PRHFIPAdYLESTEE	1.33785
PDK1 Binding	Kinase binding site group	0.5698	0.00572021	SRBS1_HUMAN (swissprot)	S1235	QTSQDLFsYQALYSY	0.601207
PDK1 Binding	Kinase binding site group	0.59	0.00792028	SRBS1_HUMAN (swissprot)	S1241	FSYQALYsYIPQNDD	0.67399
PDK1 Binding	Kinase binding site group	0.5866	0.00754126	ASAP1_HUMAN (swissprot)	S122	GTAFVKFsTLTKELS	0.913489
PDK1 Binding	Kinase binding site group	0.5201	0.00173783	PAK1_HUMAN (swissprot)	T146	SQKYMSFtDKSAEDY	1.71768
PDK1 Binding	Kinase binding site group	0.5975	0.00876548	PAK1_HUMAN (swissprot)	E274	KKKYTRFeKIGQGAS	0.933806
PDK1 Binding	Kinase binding site group	0.1246	6.98237e-05	AKT1_HUMAN (swissprot)	S473	RPHFPQFsYSASGTA	0.976962
PDK1 Binding	Kinase binding site group	0.5747	0.00625135	PK3CA_HUMAN (swissprot)	D431	WGNINLFdYTDTLVS	1.03206
PDK1 Binding	Kinase binding site group	0.5888	0.00778504	FYN_HUMAN (swissprot)	T444	AALYGRFtIKSDVWS	1.05377
PDK1 Binding	Kinase binding site group	0.5626	0.00493975	FYN_HUMAN (swissprot)	E514	PEERPTFeYLQSFLE	1.10992
PDK1 Binding	Kinase binding site group	0.5771	0.0065115	SRC_HUMAN (swissprot)	D94	TTFVALYdYESRTET	1.79836
PDK1 Binding	Kinase binding site group	0.5888	0.00778504	SRC_HUMAN (swissprot)	T443	AALYGRFtIKSDVWS	1.05377
PDK1 Binding	Kinase binding site group	0.5975	0.00876548	SRC_HUMAN (swissprot)	E513	PEERPTFeYLQAFLE	1.10992
PDK1 Binding	Kinase binding site group	0.591	0.00803297	CAN2_HUMAN (swissprot)	S50	GTLFQDPsFPAIPSA	1.0727
PDK1 Binding	Kinase binding site group	0.5636	0.00504815	CAN2_HUMAN (swissprot)	T208	TEGFEDFtGGIAEWY	0.328327
PDK1 Binding	Kinase binding site group	0.5975	0.00876548	CAN2_HUMAN (swissprot)	E435	TIGFGIYeVPEELSG	0.866418
PDK1 Binding	Kinase binding site group	0.6069	0.00982479	KPCA_HUMAN (swissprot)	T48	ARFFKQPtFCSHCTD	0.550918
PDK1 Binding	Kinase binding site group	0.5784	0.00665241	KPCA_HUMAN (swissprot)	S85	CHEFVTFsCPGADKG	0.31481
PDK1 Binding	Kinase binding site group	0.536	0.00276764	KPCA_HUMAN (swissprot)	T108	KHKFKIHtYGSPTFC	0.655544
PDK1 Binding	Kinase binding site group	0.5827	0.00711852	KPCA_HUMAN (swissprot)	T228	PQWNESFtFKLKPSD	0.548093
PDK1 Binding	Kinase binding site group	0.0962	2.68186e-05	KPCA_HUMAN (swissprot)	S657	QSDFEGFsYVNPQFV	0.511114
PDGFR Kin	Tyrosine kinase group	0.3465	0.00301861	ITA8_HUMAN (swissprot)	Y698	MIPEEADyVGIERNN	0.311911
PDGFR Kin	Tyrosine kinase group	0.3697	0.00503412	PTPRA_HUMAN (swissprot)	Y271	ENKEKNRyVNILPYD	1.02047
PDGFR Kin	Tyrosine kinase group	0.3074	0.00116226	FAK1_HUMAN (swissprot)	Y397	SVSETDDyAEIIDEE	1.22815
PDGFR Kin	Tyrosine kinase group	0.2586	0.000278743	FAK1_HUMAN (swissprot)	Y950	QPAPPEEyVPMVKEV	1.22318
PDGFR Kin	Tyrosine kinase group	0.3953	0.00835076	VINEX_HUMAN (swissprot)	Y509	QGIFPASyVQVSREP	0.463789
PDGFR Kin	Tyrosine kinase group	0.3601	0.00403612	SRBS1_HUMAN (swissprot)	Y415	DTPEENPyFPTYKFP	1.79177
PDGFR Kin	Tyrosine kinase group	0.3892	0.00748293	SRBS1_HUMAN (swissprot)	Y922	QGIFPITyVDVIKRP	0.33419
PDGFR Kin	Tyrosine kinase group	0.3043	0.0010793	KPCA_HUMAN (swissprot)	Y285	LNQEEGEyYNVPIPE	1.19522
p85 SH3 mode2	Src homology 3 group	0.6091	0.00974408	ITA3_HUMAN (swissprot)	P870	PGDRPSSpQRRRRQL	4.22792
p85 SH3 mode2	Src homology 3 group	0.4475	0.000580167	ITA5_HUMAN (swissprot)	P27	RRRPPLLpLLLLLLP	0.135168
p85 SH3 mode2	Src homology 3 group	0.6037	0.00904101	ITB4_HUMAN (swissprot)	P1478	THLSPHVpHRVLSTS	0.70793
p85 SH3 mode2	Src homology 3 group	0.3921	0.000159518	FLNA_HUMAN (swissprot)	P274	AKLKPGApLRPKLNP	0.884822
p85 SH3 mode2	Src homology 3 group	0.5801	0.00642049	FLNA_HUMAN (swissprot)	P861	DQATPTSpIRVKVEP	0.698378
p85 SH3 mode2	Src homology 3 group	0.5034	0.00186218	TENS1_HUMAN (swissprot)	P633	EPQLPPApVRGGSSR	0.79634
p85 SH3 mode2	Src homology 3 group	0.5842	0.00679485	TENS1_HUMAN (swissprot)	P892	QPAEPPApLRRRAAS	1.75121
p85 SH3 mode2	Src homology 3 group	0.4711	0.000979395	PTPRA_HUMAN (swissprot)	P222	NRKYPPLpVDKLEEE	1.12009
p85 SH3 mode2	Src homology 3 group	0.4798	0.00118679	FAK1_HUMAN (swissprot)	P715	SDEAPPKpSRPGYPS	4.44739
p85 SH3 mode2	Src homology 3 group	0.5046	0.00190491	FAK1_HUMAN (swissprot)	P876	PAAPPKKpPRPGAPG	6.63687
p85 SH3 mode2	Src homology 3 group	0.5699	0.00548916	PAXI_HUMAN (swissprot)	P327	SSSPPGGpPKPGSQL	1.6594
p85 SH3 mode2	Src homology 3 group	0.583	0.00668528	PARVA_HUMAN (swissprot)	P12	PQKSPSVpKSPTPKS	1.46062
p85 SH3 mode2	Src homology 3 group	0.5767	0.00611005	ZYX_HUMAN (swissprot)	P199	GGTAPLPpWKSPSSS	1.27336
p85 SH3 mode2	Src homology 3 group	0.6072	0.00949671	SRBS1_HUMAN (swissprot)	P142	RSVHPNLpSDKSQDA	2.18418
p85 SH3 mode2	Src homology 3 group	0.5711	0.00559873	SRBS1_HUMAN (swissprot)	P1143	GERGPGGpKISKKSC	0.651959
p85 SH3 mode2	Src homology 3 group	0.5012	0.00178383	ASAP1_HUMAN (swissprot)	P794	TTEAPPLpPRNAGKG	2.28541
p85 SH3 mode2	Src homology 3 group	0.4925	0.00151754	ASAP1_HUMAN (swissprot)	P898	PRVLPKLpQKVALRK	1.50231
p85 SH3 mode2	Src homology 3 group	0.5553	0.00442434	PAK1_HUMAN (swissprot)	P16	QDKPPAPpMRNTSTM	1.79177
p85 SH3 mode2	Src homology 3 group	0.6046	0.00915819	BCAR1_HUMAN (swissprot)	P641	SRPLPSPpKFTSQDS	1.83513
p85 SH3 mode2	Src homology 3 group	0.5531	0.00426972	BCAR1_HUMAN (swissprot)	P730	TPAQPLApGRTGGLG	0.825834
p85 SH3 mode1	Src homology 3 group	0.4315	0.000503478	ITA5_HUMAN (swissprot)	P24	WGPRRRPpLLPLLLL	1.1286
p85 SH3 mode1	Src homology 3 group	0.4539	0.000824646	FLNA_HUMAN (swissprot)	P271	FPKAKLKpGAPLRPK	0.90345
p85 SH3 mode1	Src homology 3 group	0.5862	0.00849597	FLNA_HUMAN (swissprot)	P274	AKLKPGApLRPKLNP	0.884822
p85 SH3 mode1	Src homology 3 group	0.4079	0.000274687	FAK1_HUMAN (swissprot)	P371	KEGERALpSIPKLAN	0.428828
p85 SH3 mode1	Src homology 3 group	0.5605	0.00568554	FAK1_HUMAN (swissprot)	P869	QPVGKPDpAAPPKKP	1.44402
p85 SH3 mode1	Src homology 3 group	0.504	0.00224152	FAK1_HUMAN (swissprot)	P873	KPDPAAPpKKPPRPG	3.42323
p85 SH3 mode1	Src homology 3 group	0.573	0.00688076	VASP_HUMAN (swissprot)	P183	PPPPPGPpPPPGLPP	2.00475
p85 SH3 mode1	Src homology 3 group	0.5797	0.00763541	ZYX_HUMAN (swissprot)	P74	PPEDFPLpPPPLAGD	1.67063
p85 SH3 mode1	Src homology 3 group	0.5938	0.00950216	PALLD_HUMAN (swissprot)	P679	EAGARQPpPAPRSAP	2.2921
p85 SH3 mode1	Src homology 3 group	0.5749	0.00706243	PALLD_HUMAN (swissprot)	P686	PPAPRSApPSPPFPP	1.53716
p85 SH3 mode1	Src homology 3 group	0.5291	0.00342733	SRBS1_HUMAN (swissprot)	P1005	RRSLALTpPLPPLPE	0.8316
p85 SH3 mode1	Src homology 3 group	0.5283	0.00338039	ASAP1_HUMAN (swissprot)	P829	LSKKRPPpPPPGHKR	3.13242
p85 SH3 mode1	Src homology 3 group	0.5052	0.00229159	ASAP1_HUMAN (swissprot)	P895	ALGPRVLpKLPQKVA	0.553133
p85 SH3 mode1	Src homology 3 group	0.5936	0.00947568	ASAP1_HUMAN (swissprot)	P931	SSQLAELpQKPPPGD	2.71035
p85 SH3 mode1	Src homology 3 group	0.5572	0.00537	ASAP1_HUMAN (swissprot)	P963	PPKPGELpPKPQLGD	2.41996
p85 SH3 mode1	Src homology 3 group	0.5238	0.00316829	ASAP1_HUMAN (swissprot)	P972	KPQLGDLpPKPQLSD	2.33353
p85 SH3 mode1	Src homology 3 group	0.5699	0.00658435	ASAP1_HUMAN (swissprot)	P981	KPQLSDLpPKPQMKD	2.33353
p85 SH3 mode1	Src homology 3 group	0.4526	0.000805745	ASAP1_HUMAN (swissprot)	P990	KPQMKDLpPKPQLGD	2.33353
p85 SH3 mode1	Src homology 3 group	0.5909	0.00911822	PAK1_HUMAN (swissprot)	P42	NHGSKPLpPNPEEKK	1.80428
p85 SH3 mode1	Src homology 3 group	0.5265	0.00329555	BCAR1_HUMAN (swissprot)	P317	PSVSKDVpDGPLLRE	1.1224
p85 SH3 mode1	Src homology 3 group	0.496	0.00196327	BCAR1_HUMAN (swissprot)	P638	SIQSRPLpSPPKFTS	1.44788
p85 SH2	Src homology 2 group	0.3427	0.00115612	ITA3_HUMAN (swissprot)	Y343	EEVGGAIyVFMNQAG	0.161731
p85 SH2	Src homology 2 group	0.3427	0.00115612	ITA6_HUMAN (swissprot)	Y391	GEVGGAVyVYMNQQG	0.309872
p85 SH2	Src homology 2 group	0.5024	0.00811764	ITB1_HUMAN (swissprot)	Y146	EDYPIDLyYLMDLSY	0.632392
p85 SH2	Src homology 2 group	0.368	0.0016598	ITB4_HUMAN (swissprot)	Y133	LESPVDLyILMDFSN	0.282912
p85 SH2	Src homology 2 group	0.5024	0.00811764	ITB5_HUMAN (swissprot)	Y141	EDYPVDLyYLMDLSL	0.632392
p85 SH2	Src homology 2 group	0.5024	0.00811764	ITB6_HUMAN (swissprot)	Y136	EDYPVDLyYLMDLSA	0.632392
p85 SH2	Src homology 2 group	0.5024	0.00811764	ITB7_HUMAN (swissprot)	Y155	EGYPVDLyYLMDLSY	0.632392
p85 SH2	Src homology 2 group	0.4583	0.00528594	FLNA_HUMAN (swissprot)	Y542	DGVYGFEyYPMVPGT	1.29113
p85 SH2	Src homology 2 group	0.423	0.00347901	ACTN1_HUMAN (swissprot)	Y842	ILAGDKNyITMDELR	1.20061
p85 SH2	Src homology 2 group	0.5024	0.00811764	FAK1_HUMAN (swissprot)	Y652	PNCPPTLySLMTKCW	0.467411
p85 SH2	Src homology 2 group	0.1916	0.000121227	FAK1_HUMAN (swissprot)	Y950	QPAPPEEyVPMVKEV	1.22318
p85 SH2	Src homology 2 group	0.3984	0.00263022	PALLD_HUMAN (swissprot)	Y548	ANTENCSyESMGESN	0.592443
p85 SH2	Src homology 2 group	0.5191	0.00955447	PALLD_HUMAN (swissprot)	Y1073	TLDDDGNyTIMAANP	0.594115
p85 SH2	Src homology 2 group	0.4887	0.00732811	PAK1_HUMAN (swissprot)	Y285	QGASGTVyTAMDVAT	0.554961
p85 SH2	Src homology 2 group	0.42	0.0033442	BCAR1_HUMAN (swissprot)	Y99	PAPPASQyTPMLPNT	1.84043
p38 MAPK	Proline-dependent serine/threonine kinase group	0.2518	0.000502142	ITB4_HUMAN (swissprot)	S1626	ESQVHPQsPLCPLPG	0.562162
p38 MAPK	Proline-dependent serine/threonine kinase group	0.3132	0.00391994	PALLD_HUMAN (swissprot)	S766	SSLPSPMsPTPRQFG	1.62162
Nck SH2	Src homology 2 group	0.4596	0.00768557	ITB1_HUMAN (swissprot)	Y314	MYTMSHYyDYPSIAH	3.09773
Nck SH2	Src homology 2 group	0.4537	0.00703264	FLNA_HUMAN (swissprot)	Y1047	PYEVEVTyDGVPVPG	0.471797
Nck SH2	Src homology 2 group	0.3328	0.000491319	ACTN1_HUMAN (swissprot)	Y467	ELNELDYyDSPSVNA	3.25151
Nck SH2	Src homology 2 group	0.4709	0.00994991	PALLD_HUMAN (swissprot)	Y204	SSSPDSGyLSPKNQP	0.813796
Nck SH2	Src homology 2 group	0.4199	0.00361108	ASAP1_HUMAN (swissprot)	Y38	IAETTEDyNSPTTSS	3.59377
Nck SH2	Src homology 2 group	0.4304	0.00445409	BCAR1_HUMAN (swissprot)	Y165	PSPATDLyQVPPGPG	0.982911
Nck SH2	Src homology 2 group	0.4673	0.00922211	BCAR1_HUMAN (swissprot)	Y179	GGPAQDIyQVPPSAG	0.835475
Nck SH2	Src homology 2 group	0.4568	0.00737571	BCAR1_HUMAN (swissprot)	Y234	AQPEQDEyDIPRHLL	1.87982
Nck SH2	Src homology 2 group	0.3463	0.000687641	BCAR1_HUMAN (swissprot)	Y249	APGPQDIyDVPPVRG	0.805636
Nck SH2	Src homology 2 group	0.3013	0.000206124	BCAR1_HUMAN (swissprot)	Y267	SQYGQEVyDTPPMAV	1.72009
Nck SH2	Src homology 2 group	0.3415	0.000617838	BCAR1_HUMAN (swissprot)	Y287	RDPLLEVyDVPPSVE	0.88462
Nck SH2	Src homology 2 group	0.3566	0.000837427	BCAR1_HUMAN (swissprot)	Y306	PSNHHAVyDVPPSVS	0.516028
Nck SH2	Src homology 2 group	0.4057	0.00267976	BCAR1_HUMAN (swissprot)	Y327	PLLREETyDVPPAFA	1.72009
Nck SH2	Src homology 2 group	0.2655	6.76111e-05	BCAR1_HUMAN (swissprot)	Y362	SPPAEDVyDVPPPAP	0.853027
Nck SH2	Src homology 2 group	0.3346	0.000517495	BCAR1_HUMAN (swissprot)	Y372	PPPAPDLyDVPPGLR	0.947807
Nck SH2	Src homology 2 group	0.4511	0.0067449	BCAR1_HUMAN (swissprot)	Y387	RPGPGTLyDVPRERV	0.819093
Nck 2nd SH3	Src homology 3 group	0.4985	0.00616395	ITA5_HUMAN (swissprot)	P34	PLLLLLLpPPPRVGG	0.891
Nck 2nd SH3	Src homology 3 group	0.4958	0.00586585	ITA7_HUMAN (swissprot)	P657	APGQGLPpVAPILNA	0.523908
Nck 2nd SH3	Src homology 3 group	0.4617	0.00284908	TENS1_HUMAN (swissprot)	P631	EAEPQLPpAPVRGGS	0.523908
Nck 2nd SH3	Src homology 3 group	0.4797	0.00419109	TENS1_HUMAN (swissprot)	P886	VQAREKQpAEPPAPL	3.32018
Nck 2nd SH3	Src homology 3 group	0.5245	0.00918888	FAK1_HUMAN (swissprot)	P642	IENGERLpMPPNCPP	1.35432
Nck 2nd SH3	Src homology 3 group	0.5078	0.0071572	FAK1_HUMAN (swissprot)	P712	SGGSDEApPKPSRPG	2.96445
Nck 2nd SH3	Src homology 3 group	0.49	0.00522548	PAXI_HUMAN (swissprot)	P48	QEIAVPPpVPPPPSS	1.50356
Nck 2nd SH3	Src homology 3 group	0.4676	0.00319758	VASP_HUMAN (swissprot)	P119	ALEGGGPpPPPALPT	2.00475
Nck 2nd SH3	Src homology 3 group	0.3864	0.000504941	VASP_HUMAN (swissprot)	P163	VSNAGGPpAPPAGGP	1.30977
Nck 2nd SH3	Src homology 3 group	0.5059	0.0069556	VASP_HUMAN (swissprot)	P171	APPAGGPpPPPGPPP	2.00475
Nck 2nd SH3	Src homology 3 group	0.4147	0.00115233	VASP_HUMAN (swissprot)	P174	AGGPPPPpGPPPPPG	2.00475
Nck 2nd SH3	Src homology 3 group	0.5059	0.0069556	VASP_HUMAN (swissprot)	P177	PPPPPGPpPPPGPPP	2.00475
Nck 2nd SH3	Src homology 3 group	0.4292	0.00154585	VASP_HUMAN (swissprot)	P180	PPGPPPPpGPPPPPG	2.00475
Nck 2nd SH3	Src homology 3 group	0.5059	0.0069556	VASP_HUMAN (swissprot)	P183	PPPPPGPpPPPGLPP	2.00475
Nck 2nd SH3	Src homology 3 group	0.4631	0.00292571	VASP_HUMAN (swissprot)	P206	GAGGGPPpAPPLPAA	2.04652
Nck 2nd SH3	Src homology 3 group	0.4169	0.00121359	VINC_HUMAN (swissprot)	P844	PQEPDFPpPPPDLEQ	1.75416
Nck 2nd SH3	Src homology 3 group	0.5138	0.00779385	VINC_HUMAN (swissprot)	P861	LTDELAPpKPPLPEG	2.64683
Nck 2nd SH3	Src homology 3 group	0.4631	0.00292571	ZYX_HUMAN (swissprot)	P65	GRVGEIPpPPPEDFP	1.42003
Nck 2nd SH3	Src homology 3 group	0.5138	0.00779385	ZYX_HUMAN (swissprot)	P96	LGGAFPPpPPPIEES	3.13242
Nck 2nd SH3	Src homology 3 group	0.4355	0.00172915	ZYX_HUMAN (swissprot)	P115	PLEEEIFpSPPPPPE	0.689188
Nck 2nd SH3	Src homology 3 group	0.49	0.00522548	ZYX_HUMAN (swissprot)	P118	EEIFPSPpPPPEEEG	2.71477
Nck 2nd SH3	Src homology 3 group	0.4755	0.00384624	PALLD_HUMAN (swissprot)	P564	DHFQHFPpPPPILET	1.75416
Nck 2nd SH3	Src homology 3 group	0.4169	0.00121359	PALLD_HUMAN (swissprot)	P687	PAPRSAPpSPPFPPP	1.77365
Nck 2nd SH3	Src homology 3 group	0.5245	0.00918888	PALLD_HUMAN (swissprot)	P797	APWGSSSpSPPPPPP	2.03909
Nck 2nd SH3	Src homology 3 group	0.4993	0.00625228	PALLD_HUMAN (swissprot)	P802	SSPSPPPpPPPVFSP	3.13242
Nck 2nd SH3	Src homology 3 group	0.5245	0.00918888	PALLD_HUMAN (swissprot)	P820	FPVPDVFpLPPPPPP	0.449064
Nck 2nd SH3	Src homology 3 group	0.4068	0.000931563	PALLD_HUMAN (swissprot)	P823	PDVFPLPpPPPPLPS	1.67063
Nck 2nd SH3	Src homology 3 group	0.5138	0.00779385	PALLD_HUMAN (swissprot)	P824	DVFPLPPpPPPLPSP	3.13242
Nck 2nd SH3	Src homology 3 group	0.4248	0.00142699	ASAP1_HUMAN (swissprot)	P792	SPTTEAPpLPPRNAG	1.09147
Nck 2nd SH3	Src homology 3 group	0.4169	0.00121359	ASAP1_HUMAN (swissprot)	P957	PQIGDLPpKPGELPP	1.38283
Nck 2nd SH3	Src homology 3 group	0.516	0.00802729	ASAP1_HUMAN (swissprot)	P973	PQLGDLPpKPQLSDL	2.41996
Nck 2nd SH3	Src homology 3 group	0.516	0.00802729	ASAP1_HUMAN (swissprot)	P982	PQLSDLPpKPQMKDL	2.41996
Nck 2nd SH3	Src homology 3 group	0.516	0.00802729	ASAP1_HUMAN (swissprot)	P991	PQMKDLPpKPQLGDL	2.41996
Nck 2nd SH3	Src homology 3 group	0.1136	2.48763e-06	PAK1_HUMAN (swissprot)	P13	LDIQDKPpAPPMRNT	2.64683
Nck 2nd SH3	Src homology 3 group	0.4717	0.00353422	BCAR1_HUMAN (swissprot)	P71	VGMYDKKpAGPGPGP	2.19087
Nck 2nd SH3	Src homology 3 group	0.5245	0.00918888	BCAR1_HUMAN (swissprot)	P92	PQPGLHApAPPASQY	1.17661
Lck SH2	Src homology 2 group	0.4084	0.00938442	ITA5_HUMAN (swissprot)	Y830	GPAVHHVyELINQGP	0.36307
Lck SH2	Src homology 2 group	0.4017	0.0082996	ITB7_HUMAN (swissprot)	Y356	TSAALPVyQELSKLI	1.01932
Lck SH2	Src homology 2 group	0.3892	0.00640692	FAK1_HUMAN (swissprot)	Y397	SVSETDDyAEIIDEE	1.22815
Lck SH2	Src homology 2 group	0.4028	0.00847771	FAK1_HUMAN (swissprot)	Y407	IIDEEDTyTMPSTRD	1.91122
Lck SH2	Src homology 2 group	0.4024	0.00841294	FAK1_HUMAN (swissprot)	Y925	DRSNDKVyENVTGLV	1.14411
Lck SH2	Src homology 2 group	0.282	0.000543167	PAXI_HUMAN (swissprot)	Y40	YPTGNHTyQEIAVPP	1.48254
Lck Kinase	Tyrosine kinase group	0.4841	0.00879943	FLNA_HUMAN (swissprot)	Y538	KDLGDGVyGFEYYPM	0.391417
Lck Kinase	Tyrosine kinase group	0.4662	0.00621777	PTPRA_HUMAN (swissprot)	Y471	TERKVDVyGFVSRIR	0.283078
Lck Kinase	Tyrosine kinase group	0.4666	0.00626207	PALLD_HUMAN (swissprot)	Y990	ESGDEVQyGDVPVEN	0.566157
Lck Kinase	Tyrosine kinase group	0.4753	0.0073771	KPCA_HUMAN (swissprot)	Y365	RKGTEELyAIKILKK	0.726294
Itk SH3	Src homology 3 group	0.5614	0.00376378	FLNA_HUMAN (swissprot)	P271	FPKAKLKpGAPLRPK	0.90345
Itk SH3	Src homology 3 group	0.6069	0.00948815	TENS1_HUMAN (swissprot)	P630	SEAEPQLpPAPVRGG	1.22245
Itk SH3	Src homology 3 group	0.5933	0.00714269	FAK1_HUMAN (swissprot)	P712	SGGSDEApPKPSRPG	2.96445
Itk SH3	Src homology 3 group	0.5938	0.00719565	FAK1_HUMAN (swissprot)	P873	KPDPAAPpKKPPRPG	3.42323
Itk SH3	Src homology 3 group	0.5962	0.00744987	VASP_HUMAN (swissprot)	P172	PPAGGPPpPPGPPPP	2.00475
Itk SH3	Src homology 3 group	0.603	0.00863553	VASP_HUMAN (swissprot)	P206	GAGGGPPpAPPLPAA	2.04652
Itk SH3	Src homology 3 group	0.6055	0.00918208	ZYX_HUMAN (swissprot)	P74	PPEDFPLpPPPLAGD	1.67063
Itk SH3	Src homology 3 group	0.6069	0.00948815	ZYX_HUMAN (swissprot)	P133	GPEAPIPpPPQPREK	1.59044
Itk SH3	Src homology 3 group	0.5488	0.00286619	PALLD_HUMAN (swissprot)	P799	WGSSSPSpPPPPPPV	2.71477
Itk SH3	Src homology 3 group	0.6055	0.00918208	PALLD_HUMAN (swissprot)	P801	SSSPSPPpPPPPVFS	3.13242
Itk SH3	Src homology 3 group	0.5962	0.00744987	PALLD_HUMAN (swissprot)	P824	DVFPLPPpPPPLPSP	3.13242
Itk SH3	Src homology 3 group	0.6031	0.00865739	PALLD_HUMAN (swissprot)	P826	FPLPPPPpPLPSPGQ	1.67063
Itk SH3	Src homology 3 group	0.524	0.00172523	ASAP1_HUMAN (swissprot)	P827	STLSKKRpPPPPPGH	5.1316
Itk SH3	Src homology 3 group	0.5745	0.00515136	ASAP1_HUMAN (swissprot)	P828	TLSKKRPpPPPPGHK	3.96773
Itk SH3	Src homology 3 group	0.5677	0.00443109	ASAP1_HUMAN (swissprot)	P829	LSKKRPPpPPPGHKR	3.13242
Itk SH3	Src homology 3 group	0.4989	0.000977833	PAK1_HUMAN (swissprot)	P13	LDIQDKPpAPPMRNT	2.64683
Itk SH3	Src homology 3 group	0.603	0.00863553	PAK1_HUMAN (swissprot)	P188	DDDATPPpVIAPRPE	0.445322
Itk SH3	Src homology 3 group	0.603	0.00863553	BCAR1_HUMAN (swissprot)	P338	PAFAKAKpFDPARTP	1.6008
Itk SH2	Src homology 2 group	0.468	0.00724131	SHPS1_HUMAN (swissprot)	Y453	EPNNHTEyASIQTSP	0.85171
Itk SH2	Src homology 2 group	0.4094	0.00198313	FAK1_HUMAN (swissprot)	Y407	IIDEEDTyTMPSTRD	1.91122
Itk SH2	Src homology 2 group	0.4534	0.00523356	PAXI_HUMAN (swissprot)	Y31	FLSEETPySYPTGNH	2.6018
Itk SH2	Src homology 2 group	0.47	0.00761317	PAXI_HUMAN (swissprot)	Y118	VGEEEHVySFPNKQK	0.650724
Itk SH2	Src homology 2 group	0.4714	0.00787348	ASAP1_HUMAN (swissprot)	Y38	IAETTEDyNSPTTSS	3.59377
Itk SH2	Src homology 2 group	0.4817	0.00978856	BCAR1_HUMAN (swissprot)	Y115	QPQPDSVyLVPTPSK	0.338038
Itk SH2	Src homology 2 group	0.4113	0.00206134	BCAR1_HUMAN (swissprot)	Y165	PSPATDLyQVPPGPG	0.982911
Itk SH2	Src homology 2 group	0.4548	0.00536348	BCAR1_HUMAN (swissprot)	Y179	GGPAQDIyQVPPSAG	0.835475
Itk SH2	Src homology 2 group	0.4808	0.00962123	BCAR1_HUMAN (swissprot)	Y192	AGMGHDIyQVPPSMD	0.835475
Itk SH2	Src homology 2 group	0.4376	0.00376726	BCAR1_HUMAN (swissprot)	Y249	APGPQDIyDVPPVRG	0.805636
Itk SH2	Src homology 2 group	0.4639	0.006479	BCAR1_HUMAN (swissprot)	Y267	SQYGQEVyDTPPMAV	1.72009
Itk SH2	Src homology 2 group	0.4162	0.00226303	BCAR1_HUMAN (swissprot)	Y287	RDPLLEVyDVPPSVE	0.88462
Itk SH2	Src homology 2 group	0.4319	0.00323827	BCAR1_HUMAN (swissprot)	Y327	PLLREETyDVPPAFA	1.72009
Itk SH2	Src homology 2 group	0.3017	0.000140355	BCAR1_HUMAN (swissprot)	Y362	SPPAEDVyDVPPPAP	0.853027
Itk SH2	Src homology 2 group	0.4238	0.00257586	BCAR1_HUMAN (swissprot)	Y372	PPPAPDLyDVPPGLR	0.947807
Itk SH2	Src homology 2 group	0.3948	0.00138216	BCAR1_HUMAN (swissprot)	Y410	GVVDSGVyAVPPPAE	0.305795
Itk SH2	Src homology 2 group	0.4549	0.00537276	KPCA_HUMAN (swissprot)	Y285	LNQEEGEyYNVPIPE	1.19522
Itk Kinase	Tyrosine kinase group	0.3707	0.00239423	ITA1_HUMAN (swissprot)	Y604	DDHGGAVyIYHGSGK	0.402403
Itk Kinase	Tyrosine kinase group	0.4059	0.00545326	ITA3_HUMAN (swissprot)	Y249	PEDQGNLyIGYTMQV	0.537533
Itk Kinase	Tyrosine kinase group	0.4131	0.00642448	ITA3_HUMAN (swissprot)	Y400	FEGLGKVyIYHSSSK	0.796594
Itk Kinase	Tyrosine kinase group	0.4185	0.0071529	ITA4_HUMAN (swissprot)	Y717	DCSIGYIyVDHLSRI	0.665197
Itk Kinase	Tyrosine kinase group	0.3117	0.000472161	ITA8_HUMAN (swissprot)	Y855	ARDEFLLyIFHIQTL	0.201706
Itk Kinase	Tyrosine kinase group	0.4078	0.00570956	ITA9_HUMAN (swissprot)	Y397	DDFAGAVyIYHGDAG	0.402403
Itk Kinase	Tyrosine kinase group	0.2986	0.000331279	ITAV_HUMAN (swissprot)	Y840	YNNNTLLyILHYDID	0.192101
Itk Kinase	Tyrosine kinase group	0.4236	0.00799558	ILK_HUMAN (swissprot)	Y278	WMPYGSLyNVLHEGT	0.405646
Itk Kinase	Tyrosine kinase group	0.4235	0.00797607	CAV1_HUMAN (swissprot)	Y14	VDSEGHLyTVPIREQ	0.667409
Itk Kinase	Tyrosine kinase group	0.4178	0.00705848	SRBS1_HUMAN (swissprot)	Y460	EDDDSDLySPRYSFS	2.0071
Itk Kinase	Tyrosine kinase group	0.3531	0.00151135	FYN_HUMAN (swissprot)	Y339	VVSEEPIyIVTEYMN	0.292244
Itk Kinase	Tyrosine kinase group	0.4252	0.00830768	SRC_HUMAN (swissprot)	Y216	KLDSGGFyITSRTQF	0.417164
Itk Kinase	Tyrosine kinase group	0.3531	0.00151135	SRC_HUMAN (swissprot)	Y338	VVSEEPIyIVTEYMS	0.292244
Intersectin SH3A	Src homology 3 group	0.6709	0.0098922	ITA5_HUMAN (swissprot)	P36	LLLLLPPpPRVGGFN	1.90451
Intersectin SH3A	Src homology 3 group	0.586	0.00307722	ITB4_HUMAN (swissprot)	P1478	THLSPHVpHRVLSTS	0.70793
Intersectin SH3A	Src homology 3 group	0.5689	0.00248361	FLNA_HUMAN (swissprot)	P274	AKLKPGApLRPKLNP	0.884822
Intersectin SH3A	Src homology 3 group	0.4264	0.00043802	TENS1_HUMAN (swissprot)	P633	EPQLPPApVRGGSSR	0.79634
Intersectin SH3A	Src homology 3 group	0.586	0.00307722	TENS1_HUMAN (swissprot)	P663	QQQQPRPpPRQQERA	5.62889
Intersectin SH3A	Src homology 3 group	0.4032	0.000342663	TENS1_HUMAN (swissprot)	P892	QPAEPPApLRRRAAS	1.75121
Intersectin SH3A	Src homology 3 group	0.5765	0.00274744	FAK1_HUMAN (swissprot)	P715	SDEAPPKpSRPGYPS	4.44739
Intersectin SH3A	Src homology 3 group	0.6248	0.00560164	FAK1_HUMAN (swissprot)	P872	GKPDPAApPKKPPRP	2.23651
Intersectin SH3A	Src homology 3 group	0.4448	0.000548888	FAK1_HUMAN (swissprot)	P876	PAAPPKKpPRPGAPG	6.63687
Intersectin SH3A	Src homology 3 group	0.4783	0.000787444	PAXI_HUMAN (swissprot)	P50	IAVPPPVpPPPSSEA	1.50356
Intersectin SH3A	Src homology 3 group	0.6461	0.0075102	PAXI_HUMAN (swissprot)	P327	SSSPPGGpPKPGSQL	1.6594
Intersectin SH3A	Src homology 3 group	0.6536	0.00822371	ILK_HUMAN (swissprot)	P414	EGLRPTIpPGISPHV	0.384532
Intersectin SH3A	Src homology 3 group	0.5983	0.00375448	VASP_HUMAN (swissprot)	P165	NAGGPPApPAGGPPP	0.855716
Intersectin SH3A	Src homology 3 group	0.6569	0.00853766	VASP_HUMAN (swissprot)	P176	GPPPPPGpPPPPGPP	2.00475
Intersectin SH3A	Src homology 3 group	0.5116	0.00117037	VASP_HUMAN (swissprot)	P208	GGGPPPApPLPAAQG	1.09147
Intersectin SH3A	Src homology 3 group	0.6569	0.00853766	VINC_HUMAN (swissprot)	P875	GEVPPPRpPPPEEKD	3.96773
Intersectin SH3A	Src homology 3 group	0.6644	0.00925117	ZYX_HUMAN (swissprot)	P97	GGAFPPPpPPIEESF	1.42003
Intersectin SH3A	Src homology 3 group	0.6611	0.00893722	PALLD_HUMAN (swissprot)	P803	SPSPPPPpPPVFSPT	1.50356
Intersectin SH3A	Src homology 3 group	0.6611	0.00893722	PALLD_HUMAN (swissprot)	P804	PSPPPPPpPVFSPTA	0.841995
Intersectin SH3A	Src homology 3 group	0.61	0.0044101	SRBS1_HUMAN (swissprot)	P249	SPPPPLVpPAPEDLR	0.523908
Intersectin SH3A	Src homology 3 group	0.6556	0.00841398	SRBS1_HUMAN (swissprot)	P1008	LALTPPLpPLPEASI	0.891
Intersectin SH3A	Src homology 3 group	0.3002	7.67199e-05	ASAP1_HUMAN (swissprot)	P794	TTEAPPLpPRNAGKG	2.28541
Intersectin SH3A	Src homology 3 group	0.655	0.0083569	ASAP1_HUMAN (swissprot)	P830	SKKRPPPpPPGHKRT	2.00475
Intersectin SH3A	Src homology 3 group	0.6495	0.00783366	ASAP1_HUMAN (swissprot)	P831	KKRPPPPpPGHKRTL	1.76418
Intersectin SH3A	Src homology 3 group	0.6673	0.00953097	PAK1_HUMAN (swissprot)	P15	IQDKPPApPMRNTST	1.65904
Intersectin SH3A	Src homology 3 group	0.6338	0.00638757	PAK1_HUMAN (swissprot)	P16	QDKPPAPpMRNTSTM	1.79177
Intersectin SH3A	Src homology 3 group	0.5855	0.00305987	PAK1_HUMAN (swissprot)	P171	VSETPAVpPVSEDED	0.408648
Intersectin SH3A	Src homology 3 group	0.6666	0.00946073	BCAR1_HUMAN (swissprot)	P730	TPAQPLApGRTGGLG	0.825834
Insulin Receptor Kinase	Tyrosine kinase group	0.6137	0.00822985	ITB4_HUMAN (swissprot)	Y1343	DAQSGEDyDSFLMYS	2.01251
Insulin Receptor Kinase	Tyrosine kinase group	0.5438	0.00226071	FLNA_HUMAN (swissprot)	Y542	DGVYGFEyYPMVPGT	1.29113
Insulin Receptor Kinase	Tyrosine kinase group	0.6139	0.00825848	FLNA_HUMAN (swissprot)	Y846	TPRGAGSyTIMVLFA	0.476759
Insulin Receptor Kinase	Tyrosine kinase group	0.553	0.00261967	ACTN1_HUMAN (swissprot)	Y879	SVPGALDyMSFSTAL	0.567904
Insulin Receptor Kinase	Tyrosine kinase group	0.6233	0.00979639	FAK1_HUMAN (swissprot)	Y397	SVSETDDyAEIIDEE	1.22815
Insulin Receptor Kinase	Tyrosine kinase group	0.5377	0.00202271	FAK1_HUMAN (swissprot)	Y950	QPAPPEEyVPMVKEV	1.22318
Insulin Receptor Kinase	Tyrosine kinase group	0.5865	0.0048446	KPCA_HUMAN (swissprot)	Y285	LNQEEGEyYNVPIPE	1.19522
GSK3-improved	Acidophilic serine/threonine kinase group	0.4173	0.00398421	ITB4_HUMAN (swissprot)	S1404	IPRLSASsGRSSDAE	1.07997
GSK3-improved	Acidophilic serine/threonine kinase group	0.4716	0.00991182	FLNA_HUMAN (swissprot)	S962	PIPKSPFsVAVSPSL	0.228843
GSK3-improved	Acidophilic serine/threonine kinase group	0.3633	0.00128141	TENS1_HUMAN (swissprot)	T688	SPQPLAEtPIPSLPE	0.969812
GSK3-improved	Acidophilic serine/threonine kinase group	0.3663	0.00141098	TENS1_HUMAN (swissprot)	S746	PGASPLSsQPLSGSS	0.749549
GSK3-improved	Acidophilic serine/threonine kinase group	0.4241	0.00440374	TENS1_HUMAN (swissprot)	T911	ENQSPEAtSPRSPGV	2.34847
GSK3-improved	Acidophilic serine/threonine kinase group	0.4094	0.00352098	TENS1_HUMAN (swissprot)	S963	MEGTSPSsPPPSGVR	2.3528
GSK3-improved	Acidophilic serine/threonine kinase group	0.2917	0.000245565	TENS1_HUMAN (swissprot)	S967	SPSSPPPsGVRSPPG	1.05637
GSK3-improved	Acidophilic serine/threonine kinase group	0.4465	0.00658419	TENS1_HUMAN (swissprot)	S1080	PSPLSTSsPILSADS	0.53093
GSK3-improved	Acidophilic serine/threonine kinase group	0.4124	0.00369689	TENS1_HUMAN (swissprot)	T1139	QSSSPLPtVGSSYSS	0.415135
GSK3-improved	Acidophilic serine/threonine kinase group	0.4326	0.00523115	TENS1_HUMAN (swissprot)	S1236	TVSSPQSsAATTPGS	1.04981
GSK3-improved	Acidophilic serine/threonine kinase group	0.3695	0.00154918	TENS1_HUMAN (swissprot)	T1239	SPQSSAAtTPGSPSL	0.745424
GSK3-improved	Acidophilic serine/threonine kinase group	0.3269	0.000559145	TENS1_HUMAN (swissprot)	S1365	AYYPGLSsPATSPSP	0.765164
GSK3-improved	Acidophilic serine/threonine kinase group	0.3646	0.00133756	TENS1_HUMAN (swissprot)	S1417	KVSSPVAsGMSSPSG	0.302218
GSK3-improved	Acidophilic serine/threonine kinase group	0.4599	0.00819109	TENS1_HUMAN (swissprot)	T1427	SSPSGGStVSFSHTL	0.377773
GSK3-improved	Acidophilic serine/threonine kinase group	0.4416	0.00610722	PTPRA_HUMAN (swissprot)	S54	AKTSNPTsSLTSLSV	1.09309
GSK3-improved	Acidophilic serine/threonine kinase group	0.4599	0.00819109	FAK1_HUMAN (swissprot)	S893	GSLASLSsPADSYNE	0.885405
GSK3-improved	Acidophilic serine/threonine kinase group	0.4362	0.00558158	VASP_HUMAN (swissprot)	T335	TSETQPCtPSSSDYS	0.761261
GSK3-improved	Acidophilic serine/threonine kinase group	0.4612	0.00838228	PARVA_HUMAN (swissprot)	S10	TSPQKSPsVPKSPTP	1.46062
GSK3-improved	Acidophilic serine/threonine kinase group	0.4313	0.0051046	ZYX_HUMAN (swissprot)	T179	YVPPPVAtPFSSKSS	0.444973
GSK3-improved	Acidophilic serine/threonine kinase group	0.4635	0.00872054	PALLD_HUMAN (swissprot)	S125	SKRKPAMsPLLTRPS	0.322883
GSK3-improved	Acidophilic serine/threonine kinase group	0.4216	0.00423634	PALLD_HUMAN (swissprot)	S202	GESSSPDsGYLSPKN	1.01411
GSK3-improved	Acidophilic serine/threonine kinase group	0.4495	0.00687622	PALLD_HUMAN (swissprot)	S365	EVFIEGAsSTDSDSE	0.991653
GSK3-improved	Acidophilic serine/threonine kinase group	0.4345	0.00541609	PALLD_HUMAN (swissprot)	S684	QPPPAPRsAPPSPPF	2.24662
GSK3-improved	Acidophilic serine/threonine kinase group	0.4612	0.00838228	PALLD_HUMAN (swissprot)	T704	FPELAACtPPASPEP	0.432612
GSK3-improved	Acidophilic serine/threonine kinase group	0.2729	0.000143302	PALLD_HUMAN (swissprot)	T751	GPASGHGtPASSPSS	0.932323
GSK3-improved	Acidophilic serine/threonine kinase group	0.3851	0.00222292	PALLD_HUMAN (swissprot)	S755	GHGTPASsPSSSSLP	1.15458
GSK3-improved	Acidophilic serine/threonine kinase group	0.3512	0.00101612	PALLD_HUMAN (swissprot)	S759	PASSPSSsSLPSPMS	0.942513
GSK3-improved	Acidophilic serine/threonine kinase group	0.4508	0.00700276	PALLD_HUMAN (swissprot)	S794	EPEAPWGsSSPSPPP	0.887412
GSK3-improved	Acidophilic serine/threonine kinase group	0.4228	0.0043067	PALLD_HUMAN (swissprot)	T1163	CKVSGLPtPDLSWQL	0.898128
GSK3-improved	Acidophilic serine/threonine kinase group	0.3646	0.00133756	VINEX_HUMAN (swissprot)	S299	AIETRLPsPKSSPAP	1.62291
GSK3-improved	Acidophilic serine/threonine kinase group	0.3646	0.00133756	SRBS1_HUMAN (swissprot)	T82	ASSSYREtPSSSPAS	3.11531
GSK3-improved	Acidophilic serine/threonine kinase group	0.4394	0.00589307	SRBS1_HUMAN (swissprot)	S85	SYRETPSsSPASPQE	1.33221
GSK3-improved	Acidophilic serine/threonine kinase group	0.4689	0.00951473	SRBS1_HUMAN (swissprot)	S89	TPSSSPAsPQETRQH	2.22486
GSK3-improved	Acidophilic serine/threonine kinase group	0.404	0.00320435	SRBS1_HUMAN (swissprot)	S707	KRPSSSAsTKDSESP	2.00397
GSK3-improved	Acidophilic serine/threonine kinase group	0.3747	0.00177376	SRBS1_HUMAN (swissprot)	S947	LPFSSSPsRSATASP	1.68746
GSK3-improved	Acidophilic serine/threonine kinase group	0.4143	0.0038083	SRBS1_HUMAN (swissprot)	T964	SSHSKLItPAPSSLP	0.461815
GSK3-improved	Acidophilic serine/threonine kinase group	0.3936	0.00259454	SRBS1_HUMAN (swissprot)	S1028	LALSPRAsPSLSLSL	1.03844
GSK3-improved	Acidophilic serine/threonine kinase group	0.4004	0.00299326	ASAP1_HUMAN (swissprot)	S527	EANLPSPsPKPTPSS	3.04295
GSK3-improved	Acidophilic serine/threonine kinase group	0.4612	0.00838228	ASAP1_HUMAN (swissprot)	S742	RPQSFCHsSSISPQD	0.282
GSK3-improved	Acidophilic serine/threonine kinase group	0.4094	0.00352098	ASAP1_HUMAN (swissprot)	T784	STSTDSPtSPTTEAP	2.04955
GSK3-improved	Acidophilic serine/threonine kinase group	0.4684	0.00944119	ASAP1_HUMAN (swissprot)	S817	PLSTQTSsGSSTLSK	1.05561
GSK3-improved	Acidophilic serine/threonine kinase group	0.4612	0.00838228	BCAR1_HUMAN (swissprot)	T644	LPSPPKFtSQDSPDG	2.21978
GSK3 Kinase	Acidophilic serine/threonine kinase group	0.5236	0.00967495	FLNA_HUMAN (swissprot)	S962	PIPKSPFsVAVSPSL	0.228843
GSK3 Kinase	Acidophilic serine/threonine kinase group	0.4549	0.00256703	FLNA_HUMAN (swissprot)	S966	SPFSVAVsPSLDLSK	0.393513
GSK3 Kinase	Acidophilic serine/threonine kinase group	0.4798	0.00432253	TENS1_HUMAN (swissprot)	T688	SPQPLAEtPIPSLPE	0.969812
GSK3 Kinase	Acidophilic serine/threonine kinase group	0.4005	0.000891102	TENS1_HUMAN (swissprot)	S746	PGASPLSsQPLSGSS	0.749549
GSK3 Kinase	Acidophilic serine/threonine kinase group	0.4911	0.0051192	TENS1_HUMAN (swissprot)	T911	ENQSPEAtSPRSPGV	2.34847
GSK3 Kinase	Acidophilic serine/threonine kinase group	0.4843	0.00463979	TENS1_HUMAN (swissprot)	S963	MEGTSPSsPPPSGVR	2.3528
GSK3 Kinase	Acidophilic serine/threonine kinase group	0.3979	0.00085244	TENS1_HUMAN (swissprot)	S967	SPSSPPPsGVRSPPG	1.05637
GSK3 Kinase	Acidophilic serine/threonine kinase group	0.5029	0.00666851	TENS1_HUMAN (swissprot)	T1078	VSPSPLStSSPILSA	1.01501
GSK3 Kinase	Acidophilic serine/threonine kinase group	0.5211	0.00931186	TENS1_HUMAN (swissprot)	S1080	PSPLSTSsPILSADS	0.53093
GSK3 Kinase	Acidophilic serine/threonine kinase group	0.4485	0.0022569	TENS1_HUMAN (swissprot)	T1139	QSSSPLPtVGSSYSS	0.415135
GSK3 Kinase	Acidophilic serine/threonine kinase group	0.5239	0.00971853	TENS1_HUMAN (swissprot)	S1236	TVSSPQSsAATTPGS	1.04981
GSK3 Kinase	Acidophilic serine/threonine kinase group	0.4481	0.00224398	TENS1_HUMAN (swissprot)	T1239	SPQSSAAtTPGSPSL	0.745424
GSK3 Kinase	Acidophilic serine/threonine kinase group	0.4176	0.00125893	TENS1_HUMAN (swissprot)	S1365	AYYPGLSsPATSPSP	0.765164
GSK3 Kinase	Acidophilic serine/threonine kinase group	0.4675	0.00345535	TENS1_HUMAN (swissprot)	S1369	GLSSPATsPSPDSAA	1.43468
GSK3 Kinase	Acidophilic serine/threonine kinase group	0.4853	0.00471029	TENS1_HUMAN (swissprot)	S1417	KVSSPVAsGMSSPSG	0.302218
GSK3 Kinase	Acidophilic serine/threonine kinase group	0.4937	0.00533232	PTPRA_HUMAN (swissprot)	S54	AKTSNPTsSLTSLSV	1.09309
GSK3 Kinase	Acidophilic serine/threonine kinase group	0.4897	0.0050205	FAK1_HUMAN (swissprot)	T914	QEISPPPtANLDRSN	1.10021
GSK3 Kinase	Acidophilic serine/threonine kinase group	0.4662	0.0033637	ZYX_HUMAN (swissprot)	T179	YVPPPVAtPFSSKSS	0.444973
GSK3 Kinase	Acidophilic serine/threonine kinase group	0.5132	0.00816447	PALLD_HUMAN (swissprot)	S125	SKRKPAMsPLLTRPS	0.322883
GSK3 Kinase	Acidophilic serine/threonine kinase group	0.5221	0.0094571	PALLD_HUMAN (swissprot)	S216	NQPSALLsASASQSP	0.285661
GSK3 Kinase	Acidophilic serine/threonine kinase group	0.4843	0.00463979	PALLD_HUMAN (swissprot)	S684	QPPPAPRsAPPSPPF	2.24662
GSK3 Kinase	Acidophilic serine/threonine kinase group	0.4499	0.00230211	PALLD_HUMAN (swissprot)	S688	APRSAPPsPPFPPPP	1.52027
GSK3 Kinase	Acidophilic serine/threonine kinase group	0.5058	0.0070897	PALLD_HUMAN (swissprot)	T704	FPELAACtPPASPEP	0.432612
GSK3 Kinase	Acidophilic serine/threonine kinase group	0.3204	0.000155037	PALLD_HUMAN (swissprot)	T751	GPASGHGtPASSPSS	0.932323
GSK3 Kinase	Acidophilic serine/threonine kinase group	0.4715	0.00373736	PALLD_HUMAN (swissprot)	S755	GHGTPASsPSSSSLP	1.15458
GSK3 Kinase	Acidophilic serine/threonine kinase group	0.469	0.00356111	PALLD_HUMAN (swissprot)	S759	PASSPSSsSLPSPMS	0.942513
GSK3 Kinase	Acidophilic serine/threonine kinase group	0.4951	0.00553565	PALLD_HUMAN (swissprot)	S798	PWGSSSPsPPPPPPP	2.3528
GSK3 Kinase	Acidophilic serine/threonine kinase group	0.4759	0.00404757	PALLD_HUMAN (swissprot)	T1163	CKVSGLPtPDLSWQL	0.898128
GSK3 Kinase	Acidophilic serine/threonine kinase group	0.4386	0.00193716	VINEX_HUMAN (swissprot)	S299	AIETRLPsPKSSPAP	1.62291
GSK3 Kinase	Acidophilic serine/threonine kinase group	0.4071	0.000989245	VINEX_HUMAN (swissprot)	S303	RLPSPKSsPAPRRAP	1.98806
GSK3 Kinase	Acidophilic serine/threonine kinase group	0.4607	0.00297594	SRBS1_HUMAN (swissprot)	T82	ASSSYREtPSSSPAS	3.11531
GSK3 Kinase	Acidophilic serine/threonine kinase group	0.5186	0.00894876	SRBS1_HUMAN (swissprot)	S85	SYRETPSsSPASPQE	1.33221
GSK3 Kinase	Acidophilic serine/threonine kinase group	0.5173	0.00875995	SRBS1_HUMAN (swissprot)	S475	EDTKSPLsVPRSKSE	0.880308
GSK3 Kinase	Acidophilic serine/threonine kinase group	0.4441	0.00211479	SRBS1_HUMAN (swissprot)	S640	VPQSSAIsPTPEISS	0.75045
GSK3 Kinase	Acidophilic serine/threonine kinase group	0.4961	0.00568089	SRBS1_HUMAN (swissprot)	S947	LPFSSSPsRSATASP	1.68746
GSK3 Kinase	Acidophilic serine/threonine kinase group	0.5127	0.00809185	SRBS1_HUMAN (swissprot)	T1004	GRRSLALtPPLPPLP	0.543312
GSK3 Kinase	Acidophilic serine/threonine kinase group	0.4205	0.00135259	SRBS1_HUMAN (swissprot)	S1028	LALSPRAsPSLSLSL	1.03844
GSK3 Kinase	Acidophilic serine/threonine kinase group	0.4097	0.00102791	ASAP1_HUMAN (swissprot)	S527	EANLPSPsPKPTPSS	3.04295
GSK3 Kinase	Acidophilic serine/threonine kinase group	0.4979	0.00594232	ASAP1_HUMAN (swissprot)	T531	PSPSPKPtPSSDMTV	2.84009
GSK3 Kinase	Acidophilic serine/threonine kinase group	0.5255	0.00995091	ASAP1_HUMAN (swissprot)	T808	GPTGPPStLPLSTQT	0.72072
Grb2 SH3	Src homology 3 group	0.4519	0.00471377	ITB8_HUMAN (swissprot)	P356	HWYKDLLpLLPGTIA	0.25344
Grb2 SH3	Src homology 3 group	0.4757	0.00818085	TENS1_HUMAN (swissprot)	P1384	FRQGSPTpALPEKRR	1.01871
Grb2 SH3	Src homology 3 group	0.4852	0.00969752	VASP_HUMAN (swissprot)	P176	GPPPPPGpPPPPGPP	2.00475
Grb2 SH3	Src homology 3 group	0.4852	0.00969752	VASP_HUMAN (swissprot)	P182	GPPPPPGpPPPPGLP	2.00475
Grb2 SH3	Src homology 3 group	0.4599	0.00565839	VASP_HUMAN (swissprot)	P208	GGGPPPApPLPAAQG	1.09147
Grb2 SH3	Src homology 3 group	0.4809	0.00901103	VINC_HUMAN (swissprot)	P863	DELAPPKpPLPEGEV	2.16067
Grb2 SH3	Src homology 3 group	0.3493	0.000346763	ZYX_HUMAN (swissprot)	P74	PPEDFPLpPPPLAGD	1.67063
Grb2 SH3	Src homology 3 group	0.4761	0.00824471	ZYX_HUMAN (swissprot)	P76	EDFPLPPpPLAGDGD	1.09147
Grb2 SH3	Src homology 3 group	0.4733	0.00779769	ZYX_HUMAN (swissprot)	P210	PSSSQPLpQVPAPAQ	0.898128
Grb2 SH3	Src homology 3 group	0.436	0.00360971	PALLD_HUMAN (swissprot)	P689	PRSAPPSpPFPPPPA	1.52027
Grb2 SH3	Src homology 3 group	0.4294	0.00315142	PALLD_HUMAN (swissprot)	P822	VPDVFPLpPPPPPLP	1.67063
Grb2 SH3	Src homology 3 group	0.48	0.00886735	PALLD_HUMAN (swissprot)	P826	FPLPPPPpPLPSPGQ	1.67063
Grb2 SH3	Src homology 3 group	0.4442	0.0041791	SRBS1_HUMAN (swissprot)	P246	PSFSPPPpLVPPAPE	0.8019
Grb2 SH3	Src homology 3 group	0.385	0.00102992	SRBS1_HUMAN (swissprot)	P1008	LALTPPLpPLPEASI	0.891
Grb2 SH3	Src homology 3 group	0.4089	0.00172794	ASAP1_HUMAN (swissprot)	P846	SDPPSPLpHGPPNKG	0.940896
Grb2 SH3	Src homology 3 group	0.4155	0.00218623	PAK1_HUMAN (swissprot)	P42	NHGSKPLpPNPEEKK	1.80428
Grb2 SH2	Src homology 2 group	0.5301	0.00909775	ITA8_HUMAN (swissprot)	Y209	AGFSLDFyKNGDLIV	1.71616
Grb2 SH2	Src homology 2 group	0.5132	0.00766237	ITB1_HUMAN (swissprot)	Y219	NCTSPFSyKNVLSLT	1.03288
Grb2 SH2	Src homology 2 group	0.5301	0.00909775	FLNA_HUMAN (swissprot)	Y1862	PLQFYVDyVNCGHVT	0.295716
Grb2 SH2	Src homology 2 group	0.3365	0.000424778	TENS1_HUMAN (swissprot)	Y903	RAASDGQyENQSPEA	3.08241
Grb2 SH2	Src homology 2 group	0.4182	0.00202628	PTPRA_HUMAN (swissprot)	Y295	EGVPDSDyINASFIN	0.950352
Grb2 SH2	Src homology 2 group	0.4075	0.0016273	PTPRA_HUMAN (swissprot)	Y588	RGEENTDyVNASFID	1.08366
Grb2 SH2	Src homology 2 group	0.5	0.00658274	PAK1_HUMAN (swissprot)	Y464	MIEGEPPyLNENPLR	2.04773
Grb2 SH2	Src homology 2 group	0.4892	0.00546481	PK3CA_HUMAN (swissprot)	Y343	IKILCATyVNVNIRD	0.481627
Grb2 SH2	Src homology 2 group	0.5	0.00658274	BCAR1_HUMAN (swissprot)	Y653	QDSPDGQyENSEGGW	2.3852
Grb2 SH2	Src homology 2 group	0.1621	1.59778e-05	KPCA_HUMAN (swissprot)	Y285	LNQEEGEyYNVPIPE	1.19522
Grb2 SH2	Src homology 2 group	0.4892	0.00546481	KPCA_HUMAN (swissprot)	Y419	RLYFVMEyVNGGDLM	0.754876
Grb2 SH2	Src homology 2 group	0.4892	0.00546481	KPCA_HUMAN (swissprot)	Y658	SDFEGFSyVNPQFVH	0.798615
Fyn SH2	Src homology 2 group	0.425	0.00514055	ACTN1_HUMAN (swissprot)	Y592	NMAGTNPyTTITPQE	1.35378
Fyn SH2	Src homology 2 group	0.3305	0.000697055	PAXI_HUMAN (swissprot)	Y40	YPTGNHTyQEIAVPP	1.48254
Fgr SH2	Src homology 2 group	0.4375	0.00602701	FLNA_HUMAN (swissprot)	Y1047	PYEVEVTyDGVPVPG	0.471797
Fgr SH2	Src homology 2 group	0.4287	0.00519877	FAK1_HUMAN (swissprot)	Y397	SVSETDDyAEIIDEE	1.22815
Fgr SH2	Src homology 2 group	0.3782	0.00157691	FAK1_HUMAN (swissprot)	Y925	DRSNDKVyENVTGLV	1.14411
Fgr SH2	Src homology 2 group	0.3497	0.000824025	PAXI_HUMAN (swissprot)	Y40	YPTGNHTyQEIAVPP	1.48254
Fgr SH2	Src homology 2 group	0.3841	0.00191196	KPCA_HUMAN (swissprot)	Y285	LNQEEGEyYNVPIPE	1.19522
Fgr Kinase	Tyrosine kinase group	0.4089	0.00564683	ITA5_HUMAN (swissprot)	Y703	TAPPEAEySGLVRHP	0.687094
Fgr Kinase	Tyrosine kinase group	0.3798	0.00287637	ITA8_HUMAN (swissprot)	Y698	MIPEEADyVGIERNN	0.311911
Fgr Kinase	Tyrosine kinase group	0.4023	0.0048265	UROK_HUMAN (swissprot)	Y235	DYPKKEDyIVYLGRS	0.846614
Fgr Kinase	Tyrosine kinase group	0.4213	0.00718806	SHPS1_HUMAN (swissprot)	Y429	QDTNDITyADLNLPK	0.505411
Fgr Kinase	Tyrosine kinase group	0.4163	0.00656659	FLNA_HUMAN (swissprot)	Y791	LKAHEPTyFTVDCAE	0.743251
Fgr Kinase	Tyrosine kinase group	0.3592	0.00167657	FAK1_HUMAN (swissprot)	Y397	SVSETDDyAEIIDEE	1.22815
Fgr Kinase	Tyrosine kinase group	0.3883	0.00358915	FAK1_HUMAN (swissprot)	Y950	QPAPPEEyVPMVKEV	1.22318
Fgr Kinase	Tyrosine kinase group	0.3957	0.0042097	BCAR1_HUMAN (swissprot)	Y115	QPQPDSVyLVPTPSK	0.338038
Fgr Kinase	Tyrosine kinase group	0.4351	0.00982951	BCAR1_HUMAN (swissprot)	Y666	GWMEDYDyVHLQGKE	0.782585
Fgr Kinase	Tyrosine kinase group	0.3229	0.000611063	KPCA_HUMAN (swissprot)	Y285	LNQEEGEyYNVPIPE	1.19522
Erk1 Kinase	Proline-dependent serine/threonine kinase group	0.3405	0.000240007	ITA9_HUMAN (swissprot)	S778	TSITGIMsPTSFVYG	0.637116
Erk1 Kinase	Proline-dependent serine/threonine kinase group	0.5205	0.0089635	ITB4_HUMAN (swissprot)	S1626	ESQVHPQsPLCPLPG	0.562162
Erk1 Kinase	Proline-dependent serine/threonine kinase group	0.5225	0.0092276	FLNA_HUMAN (swissprot)	S1055	DGVPVPGsPFPLEAV	0.972972
Erk1 Kinase	Proline-dependent serine/threonine kinase group	0.5197	0.00885786	FLNA_HUMAN (swissprot)	S1343	DGSPVPSsPFQVPVT	1.47567
Erk1 Kinase	Proline-dependent serine/threonine kinase group	0.5253	0.00959733	TENS1_HUMAN (swissprot)	S538	GGYPEALsPLTNGLD	0.47087
Erk1 Kinase	Proline-dependent serine/threonine kinase group	0.4941	0.00569642	TENS1_HUMAN (swissprot)	T688	SPQPLAEtPIPSLPE	0.969812
Erk1 Kinase	Proline-dependent serine/threonine kinase group	0.4414	0.00205058	TENS1_HUMAN (swissprot)	S963	MEGTSPSsPPPSGVR	2.3528
Erk1 Kinase	Proline-dependent serine/threonine kinase group	0.4553	0.00275432	TENS1_HUMAN (swissprot)	S971	PPPSGVRsPPGLAKT	1.05637
Erk1 Kinase	Proline-dependent serine/threonine kinase group	0.4552	0.00274926	TENS1_HUMAN (swissprot)	T1105	SSDQGPRtPTQPLLE	3.8711
Erk1 Kinase	Proline-dependent serine/threonine kinase group	0.4743	0.00394046	TENS1_HUMAN (swissprot)	T1189	HRTVGTNtPPSPGFG	2.55405
Erk1 Kinase	Proline-dependent serine/threonine kinase group	0.4934	0.00561354	TENS1_HUMAN (swissprot)	T1350	SGYQAPStPSFPVSP	1.22973
Erk1 Kinase	Proline-dependent serine/threonine kinase group	0.4295	0.0016577	TENS1_HUMAN (swissprot)	S1356	STPSFPVsPAYYPGL	0.862702
Erk1 Kinase	Proline-dependent serine/threonine kinase group	0.4941	0.00569642	TENS1_HUMAN (swissprot)	S1365	AYYPGLSsPATSPSP	0.765164
Erk1 Kinase	Proline-dependent serine/threonine kinase group	0.5237	0.00938606	TENS1_HUMAN (swissprot)	S1369	GLSSPATsPSPDSAA	1.43468
Erk1 Kinase	Proline-dependent serine/threonine kinase group	0.4451	0.00223791	PTPRA_HUMAN (swissprot)	T131	NSSTAATtPETFPPS	1.86356
Erk1 Kinase	Proline-dependent serine/threonine kinase group	0.5186	0.00871261	PTPRA_HUMAN (swissprot)	T416	PDFGVPFtPIGMLKF	0.47501
Erk1 Kinase	Proline-dependent serine/threonine kinase group	0.5145	0.00817121	FAK1_HUMAN (swissprot)	S910	KLQPQEIsPPPTANL	1.37838
Erk1 Kinase	Proline-dependent serine/threonine kinase group	0.431	0.00170527	PAXI_HUMAN (swissprot)	S178	PPLPGALsPLYGVPE	0.511231
Erk1 Kinase	Proline-dependent serine/threonine kinase group	0.3473	0.000273963	PAXI_HUMAN (swissprot)	S322	QGKTGSSsPPGGPPK	1.30502
Erk1 Kinase	Proline-dependent serine/threonine kinase group	0.5065	0.0071646	VASP_HUMAN (swissprot)	T335	TSETQPCtPSSSDYS	0.761261
Erk1 Kinase	Proline-dependent serine/threonine kinase group	0.4303	0.00168307	PARVA_HUMAN (swissprot)	S14	KSPSVPKsPTPKSPP	3.27702
Erk1 Kinase	Proline-dependent serine/threonine kinase group	0.4941	0.00569642	PARVA_HUMAN (swissprot)	S19	PKSPTPKsPPSRKKD	3.04295
Erk1 Kinase	Proline-dependent serine/threonine kinase group	0.3498	0.000292181	PARVA_HUMAN (swissprot)	S62	NAINLPLsPIPFELD	0.65637
Erk1 Kinase	Proline-dependent serine/threonine kinase group	0.4118	0.0011515	ZYX_HUMAN (swissprot)	S116	LEEEIFPsPPPPPEE	1.52027
Erk1 Kinase	Proline-dependent serine/threonine kinase group	0.452	0.00258725	ZYX_HUMAN (swissprot)	S259	PRGPPASsPAPAPKF	1.00428
Erk1 Kinase	Proline-dependent serine/threonine kinase group	0.5256	0.00963695	ZYX_HUMAN (swissprot)	S308	ALSAGTGsPQPPSFT	1.81621
Erk1 Kinase	Proline-dependent serine/threonine kinase group	0.4679	0.00348017	PALLD_HUMAN (swissprot)	S206	SPDSGYLsPKNQPSA	2.04936
Erk1 Kinase	Proline-dependent serine/threonine kinase group	0.4864	0.00481069	PALLD_HUMAN (swissprot)	S641	PTPAVLLsPTKEPPP	0.932131
Erk1 Kinase	Proline-dependent serine/threonine kinase group	0.4699	0.00362401	PALLD_HUMAN (swissprot)	S684	QPPPAPRsAPPSPPF	2.24662
Erk1 Kinase	Proline-dependent serine/threonine kinase group	0.2959	7.67333e-05	PALLD_HUMAN (swissprot)	S688	APRSAPPsPPFPPPP	1.52027
Erk1 Kinase	Proline-dependent serine/threonine kinase group	0.4947	0.00576746	PALLD_HUMAN (swissprot)	S708	AACTPPAsPEPMSAL	1.98648
Erk1 Kinase	Proline-dependent serine/threonine kinase group	0.3946	0.000775581	PALLD_HUMAN (swissprot)	S766	SSLPSPMsPTPRQFG	1.62162
Erk1 Kinase	Proline-dependent serine/threonine kinase group	0.3881	0.000686083	PALLD_HUMAN (swissprot)	S796	EAPWGSSsPSPPPPP	1.76721
Erk1 Kinase	Proline-dependent serine/threonine kinase group	0.3387	0.000231018	PALLD_HUMAN (swissprot)	S798	PWGSSSPsPPPPPPP	2.3528
Erk1 Kinase	Proline-dependent serine/threonine kinase group	0.5257	0.00965015	PALLD_HUMAN (swissprot)	S1104	QRGRSPRsPSGHPHV	1.90733
Erk1 Kinase	Proline-dependent serine/threonine kinase group	0.5001	0.00640683	SRBS1_HUMAN (swissprot)	T181	EGTARPPtPLGPLGC	0.99792
Erk1 Kinase	Proline-dependent serine/threonine kinase group	0.498	0.00615818	SRBS1_HUMAN (swissprot)	T237	SFAPISQtPPSFSPP	2.45946
Erk1 Kinase	Proline-dependent serine/threonine kinase group	0.3966	0.000819292	SRBS1_HUMAN (swissprot)	S242	SQTPPSFsPPPPLVP	1.31757
Erk1 Kinase	Proline-dependent serine/threonine kinase group	0.5092	0.00748428	SRBS1_HUMAN (swissprot)	T438	SEEDNPYtPTYQFPA	2.80194
Erk1 Kinase	Proline-dependent serine/threonine kinase group	0.4869	0.00484665	SRBS1_HUMAN (swissprot)	S640	VPQSSAIsPTPEISS	0.75045
Erk1 Kinase	Proline-dependent serine/threonine kinase group	0.439	0.00195899	SRBS1_HUMAN (swissprot)	T1004	GRRSLALtPPLPPLP	0.543312
Erk1 Kinase	Proline-dependent serine/threonine kinase group	0.4888	0.00506889	ASAP1_HUMAN (swissprot)	S525	IMEANLPsPSPKPTP	1.25483
Erk1 Kinase	Proline-dependent serine/threonine kinase group	0.492	0.00544778	ASAP1_HUMAN (swissprot)	S527	EANLPSPsPKPTPSS	3.04295
Erk1 Kinase	Proline-dependent serine/threonine kinase group	0.5065	0.0071646	ASAP1_HUMAN (swissprot)	S785	TSTDSPTsPTTEAPP	2.2072
Erk1 Kinase	Proline-dependent serine/threonine kinase group	0.4341	0.00180359	ASAP1_HUMAN (swissprot)	S843	RTLSDPPsPLPHGPP	1.44788
Erk1 Kinase	Proline-dependent serine/threonine kinase group	0.4374	0.00190825	ASAP1_HUMAN (swissprot)	T1054	LTPTLPEtPVPLPRK	1.57172
Erk1 Kinase	Proline-dependent serine/threonine kinase group	0.4739	0.00391169	AKT1_HUMAN (swissprot)	S422	HVYEKKLsPPFKPQV	1.04865
Erk1 Kinase	Proline-dependent serine/threonine kinase group	0.4018	0.000932941	FYN_HUMAN (swissprot)	S307	TLKPGTMsPESFLEE	1.57405
Erk1 Kinase	Proline-dependent serine/threonine kinase group	0.448	0.00238473	SRC_HUMAN (swissprot)	S306	TLKPGTMsPEAFLQE	1.18659
Erk1 Kinase	Proline-dependent serine/threonine kinase group	0.5257	0.00965015	BCAR1_HUMAN (swissprot)	S355	LAAPPPDsPPAEDVY	1.91554
Erk1 Kinase	Proline-dependent serine/threonine kinase group	0.4769	0.00412745	BCAR1_HUMAN (swissprot)	S639	IQSRPLPsPPKFTSQ	1.87258
Erk1 Kinase	Proline-dependent serine/threonine kinase group	0.5213	0.00906914	KPCA_HUMAN (swissprot)	T638	TRGQPVLtPPDQLVI	0.808315
Erk1 Binding	Kinase binding site group	0.224	0.00111985	ITA5_HUMAN (swissprot)	P429	QGVVFVFpGGPGGLG	0.344881
Erk1 Binding	Kinase binding site group	0.5468	0.00524559	ITB1_HUMAN (swissprot)	P317	MSHYYDYpSIAHLVQ	0.879956
Erk1 Binding	Kinase binding site group	0.2094	0.00097975	ITB4_HUMAN (swissprot)	P1452	GRMDFAFpGSTNSLH	0.593297
Erk1 Binding	Kinase binding site group	0.3396	0.00270874	ITB7_HUMAN (swissprot)	P328	RSTEFDYpSVGQVAQ	0.912703
Erk1 Binding	Kinase binding site group	0.4722	0.00456839	UROK_HUMAN (swissprot)	P329	NSTDYLYpEQLKMTV	1.13257
Erk1 Binding	Kinase binding site group	0.4918	0.00482209	TENS1_HUMAN (swissprot)	P80	KVLEFGWpDLHTPAL	0.690994
Erk1 Binding	Kinase binding site group	0.4059	0.00364726	PAXI_HUMAN (swissprot)	P34	EETPYSYpTGNHTYQ	1.7747
Erk1 Binding	Kinase binding site group	0.2968	0.00192516	PAXI_HUMAN (swissprot)	P121	EEHVYSFpNKQKSAE	2.37833
Erk1 Binding	Kinase binding site group	0.3312	0.00255495	VINEX_HUMAN (swissprot)	P359	GRRDFVYpSSTRDPS	1.06811
Erk1 Binding	Kinase binding site group	0.1794	0.000671029	VINEX_HUMAN (swissprot)	P572	RRTGFSFpTQEPRPQ	1.77989
Erk1 Binding	Kinase binding site group	0.3373	0.00266663	SRBS1_HUMAN (swissprot)	P422	YFPTYKFpELPEIQQ	1.35518
Erk1 Binding	Kinase binding site group	0.2649	0.00154646	SRBS1_HUMAN (swissprot)	P444	YTPTYQFpASTPSPK	1.03827
Erk1 Binding	Kinase binding site group	0.4914	0.00481885	PK3CA_HUMAN (swissprot)	P168	SRAMYVYpPNVESSP	0.789839
Erk D-domain	Kinase binding site group	0.6101	0.00992394	ITA3_HUMAN (swissprot)	L19	PRLMLCAlALMVAAG	0.08438
Erk D-domain	Kinase binding site group	0.5584	0.00495103	ITA3_HUMAN (swissprot)	L555	MRCQKLElLLMDNLR	0.181666
Erk D-domain	Kinase binding site group	0.6054	0.00931711	ITA3_HUMAN (swissprot)	L591	PRLGLRSlDAYPILN	1.31131
Erk D-domain	Kinase binding site group	0.5376	0.00369948	ITA3_HUMAN (swissprot)	L653	RDVRKLLlSINVTNT	0.201637
Erk D-domain	Kinase binding site group	0.5323	0.00344794	ITA3_HUMAN (swissprot)	I655	VRKLLLSiNVTNTRT	0.317578
Erk D-domain	Kinase binding site group	0.6054	0.00931711	ITA3_HUMAN (swissprot)	L716	KRNQRMElLIAFEVI	0.18916
Erk D-domain	Kinase binding site group	0.5503	0.00441274	ITA4_HUMAN (swissprot)	V129	RDNQWLGvTLSRQPG	0.221405
Erk D-domain	Kinase binding site group	0.6101	0.00992394	ITA4_HUMAN (swissprot)	L572	RKDVRDIlTPIQIEA	0.346079
Erk D-domain	Kinase binding site group	0.5765	0.00630132	ITA4_HUMAN (swissprot)	I744	RAEEDLSiTVHATCE	0.258767
Erk D-domain	Kinase binding site group	0.495	0.00196953	ITA5_HUMAN (swissprot)	L26	PRRRPPLlPLLLLLL	0.25344
Erk D-domain	Kinase binding site group	0.2923	4.85483e-05	ITA5_HUMAN (swissprot)	L28	RRPPLLPlLLLLLPP	0.135168
Erk D-domain	Kinase binding site group	0.5644	0.00534977	ITA5_HUMAN (swissprot)	I606	DKLSPIHiALNFSLD	0.213184
Erk D-domain	Kinase binding site group	0.5939	0.00799281	ITA6_HUMAN (swissprot)	I715	QKDIALEiTVTNSPS	0.354674
Erk D-domain	Kinase binding site group	0.5853	0.00715678	ITA7_HUMAN (swissprot)	V635	DKLRAIVvTLSYSLQ	0.141146
Erk D-domain	Kinase binding site group	0.5464	0.00415356	ITA7_HUMAN (swissprot)	L849	RARVFIElPLSIAGM	0.392072
Erk D-domain	Kinase binding site group	0.5149	0.00265305	ITA7_HUMAN (swissprot)	L948	PRPNILHlDVDSRDR	0.438984
Erk D-domain	Kinase binding site group	0.5156	0.00267709	ITA8_HUMAN (swissprot)	I602	DKLSPINiSLNYSLD	0.347067
Erk D-domain	Kinase binding site group	0.5665	0.00548933	ITA9_HUMAN (swissprot)	L18	GRLRALLlALVVAGI	0.0794788
Erk D-domain	Kinase binding site group	0.5973	0.00832333	ITA9_HUMAN (swissprot)	I1015	RRRYKEIiEAEKNRK	0.590887
Erk D-domain	Kinase binding site group	0.6054	0.00931711	ITB1_HUMAN (swissprot)	I143	KRAEDYPiDLYYLMD	0.839895
Erk D-domain	Kinase binding site group	0.6051	0.00927838	ITB1_HUMAN (swissprot)	I420	RKCSNISiGDEVQFE	0.431906
Erk D-domain	Kinase binding site group	0.5062	0.00235422	ITB4_HUMAN (swissprot)	I1328	KRPMSIPiIPDIPIV	0.315179
Erk D-domain	Kinase binding site group	0.5028	0.00223744	ITB6_HUMAN (swissprot)	I435	RRSRHIIiKPVGLGD	0.181169
Erk D-domain	Kinase binding site group	0.5746	0.00611662	UROK_HUMAN (swissprot)	V135	RRRPWCYvQVGLKPL	0.181729
Erk D-domain	Kinase binding site group	0.555	0.00472508	UROK_HUMAN (swissprot)	V205	RRHRGGSvTYVCGGS	0.378603
Erk D-domain	Kinase binding site group	0.6002	0.00864574	SHPS1_HUMAN (swissprot)	L17	RLGPLLClLLAASCA	0.0574013
Erk D-domain	Kinase binding site group	0.602	0.00887814	SHPS1_HUMAN (swissprot)	L142	KSGAGTElSVRAKPS	0.920215
Erk D-domain	Kinase binding site group	0.5485	0.00429312	SHPS1_HUMAN (swissprot)	L283	RKFYPQRlQLTWLEN	1.32133
Erk D-domain	Kinase binding site group	0.5927	0.00787615	SHPS1_HUMAN (swissprot)	V349	SKSHDLKvSAHPKEQ	0.516774
Erk D-domain	Kinase binding site group	0.5584	0.00495103	TLN1_HUMAN (swissprot)	L1228	KRLLSDSlPPSTGTF	1.35521
Erk D-domain	Kinase binding site group	0.6072	0.00954951	FLNA_HUMAN (swissprot)	V965	KSPFSVAvSPSLDLS	0.354162
Erk D-domain	Kinase binding site group	0.4869	0.00173474	FLNA_HUMAN (swissprot)	V2007	KRLRNGHvGISFVPK	0.212929
Erk D-domain	Kinase binding site group	0.6072	0.00954951	FLNA_HUMAN (swissprot)	V2153	RRRRAPSvANVGSHC	0.44134
Erk D-domain	Kinase binding site group	0.5712	0.00580167	ACTN1_HUMAN (swissprot)	L67	RDGLKLMlLLEVISG	0.181666
Erk D-domain	Kinase binding site group	0.5212	0.00292113	TENS1_HUMAN (swissprot)	L70	RRPDITKlHAKVLEF	1.49953
Erk D-domain	Kinase binding site group	0.5647	0.00536971	PTPRA_HUMAN (swissprot)	I567	KKNRVLQiIPYEFNR	0.389659
Erk D-domain	Kinase binding site group	0.3747	0.000302637	FAK1_HUMAN (swissprot)	L672	RRPRFTElKAQLSTI	1.65271
Erk D-domain	Kinase binding site group	0.5631	0.00526338	ILK_HUMAN (swissprot)	V16	REGNAVAvRLWLDNT	0.216605
Erk D-domain	Kinase binding site group	0.6101	0.00992394	ILK_HUMAN (swissprot)	L71	NRGDDTPlHLAASHG	0.478115
Erk D-domain	Kinase binding site group	0.5973	0.00832333	ILK_HUMAN (swissprot)	I442	KRPKFDMiVPILEKM	0.21358
Erk D-domain	Kinase binding site group	0.5289	0.00328658	VINC_HUMAN (swissprot)	L765	RRANRILlVAKREVE	0.163826
Erk D-domain	Kinase binding site group	0.602	0.00887814	ZYX_HUMAN (swissprot)	I144	PREKVSSiDLEIDSL	0.688086
Erk D-domain	Kinase binding site group	0.4689	0.00136589	PALLD_HUMAN (swissprot)	L395	KKTTSVSlTIGSSSP	0.188194
Erk D-domain	Kinase binding site group	0.5765	0.00630132	VINEX_HUMAN (swissprot)	L12	PRSLRAGlSLDDFIP	0.348713
Erk D-domain	Kinase binding site group	0.4462	0.000979375	SRBS1_HUMAN (swissprot)	L500	KRSATLPlPARSSSL	0.737352
Erk D-domain	Kinase binding site group	0.5538	0.00464534	SRBS1_HUMAN (swissprot)	L1033	RASPSLSlSLPHLSW	0.356928
Erk D-domain	Kinase binding site group	0.5991	0.00850371	ASAP1_HUMAN (swissprot)	L655	SKPECLKlLLRSKPT	0.415191
Erk D-domain	Kinase binding site group	0.5177	0.00275502	ASAP1_HUMAN (swissprot)	L955	PKPQIGDlPPKPGEL	1.49346
Erk D-domain	Kinase binding site group	0.4997	0.00213096	ASAP1_HUMAN (swissprot)	L971	PKPQLGDlPPKPQLS	1.49346
Erk D-domain	Kinase binding site group	0.5793	0.00657351	ASAP1_HUMAN (swissprot)	L980	PKPQLSDlPPKPQMK	2.02239
Erk D-domain	Kinase binding site group	0.5973	0.00832333	ASAP1_HUMAN (swissprot)	L989	PKPQMKDlPPKPQLG	3.01803
Erk D-domain	Kinase binding site group	0.5665	0.00548933	PAK1_HUMAN (swissprot)	V445	RKAYGPKvDIWSLGI	0.647414
Erk D-domain	Kinase binding site group	0.5149	0.00265305	PK3CA_HUMAN (swissprot)	L404	PRAARLClSICSVKG	0.0420699
Erk D-domain	Kinase binding site group	0.6101	0.00992394	FYN_HUMAN (swissprot)	V84	RTRGGTGvTLFVALY	0.250358
Erk D-domain	Kinase binding site group	0.602	0.00887814	FYN_HUMAN (swissprot)	L86	RGGTGVTlFVALYDY	0.131438
Erk D-domain	Kinase binding site group	0.5892	0.00753591	SRC_HUMAN (swissprot)	V274	RESLRLEvKLGQGCF	0.396486
Erk D-domain	Kinase binding site group	0.5584	0.00495103	BCAR1_HUMAN (swissprot)	L386	RRPGPGTlYDVPRER	0.524219
Erk D-domain	Kinase binding site group	0.5746	0.00611662	BCAR1_HUMAN (swissprot)	V458	REPLELEvAVEALAR	0.315451
Erk D-domain	Kinase binding site group	0.5793	0.00657351	CAN2_HUMAN (swissprot)	I466	RERSDTFiNLREVLN	0.541511
Erk D-domain	Kinase binding site group	0.6072	0.00954951	KPCA_HUMAN (swissprot)	V242	DKDRRLSvEIWDWDR	0.239948
EGFR Kinase	Tyrosine kinase group	0.3417	0.00117789	FAK1_HUMAN (swissprot)	Y950	QPAPPEEyVPMVKEV	1.22318
EGFR Kinase	Tyrosine kinase group	0.4124	0.00773612	VINEX_HUMAN (swissprot)	Y451	KPIKPPTyQVLEYGE	0.84943
EGFR Kinase	Tyrosine kinase group	0.3978	0.00544351	SRBS1_HUMAN (swissprot)	Y441	DNPYTPTyQFPASTP	1.85813
EGFR Kinase	Tyrosine kinase group	0.3816	0.00354023	SRBS1_HUMAN (swissprot)	Y937	LVKNPVDyMDLPFSS	0.606597
EGFR Kinase	Tyrosine kinase group	0.3732	0.00291578	PK3CA_HUMAN (swissprot)	Y68	LLQDESSyIFVSVTQ	0.290525
EGFR Kinase	Tyrosine kinase group	0.4078	0.00682955	SRC_HUMAN (swissprot)	Y338	VVSEEPIyIVTEYMS	0.292244
EGFR Kinase	Tyrosine kinase group	0.3329	0.000946934	BCAR1_HUMAN (swissprot)	Y115	QPQPDSVyLVPTPSK	0.338038
EGFR Kinase	Tyrosine kinase group	0.3855	0.00385808	BCAR1_HUMAN (swissprot)	Y362	SPPAEDVyDVPPPAP	0.853027
EGFR Kinase	Tyrosine kinase group	0.414	0.00805145	BCAR1_HUMAN (swissprot)	Y666	GWMEDYDyVHLQGKE	0.782585
EGFR Kinase	Tyrosine kinase group	0.3113	0.0004981	CAN2_HUMAN (swissprot)	Y482	FKLPPGEyILVPSTF	0.264051
EGFR Kinase	Tyrosine kinase group	0.3406	0.00114902	KPCA_HUMAN (swissprot)	Y285	LNQEEGEyYNVPIPE	1.19522
DNA PK	DNA damage kinase group	0.4784	0.00512328	ITA1_HUMAN (swissprot)	S387	TGFSAHYsQDWVMLG	1.99121
DNA PK	DNA damage kinase group	0.4729	0.00467549	ITA1_HUMAN (swissprot)	T740	SRSFFSGtQERKVQR	2.5766
DNA PK	DNA damage kinase group	0.4285	0.00216481	ITA2_HUMAN (swissprot)	S389	GFSADYSsQNDILML	3.1146
DNA PK	DNA damage kinase group	0.4109	0.00155925	ITA2_HUMAN (swissprot)	S916	SFQALSEsQEENKAD	3.70217
DNA PK	DNA damage kinase group	0.5021	0.00746679	ITA3_HUMAN (swissprot)	T206	LGTSGGFtQNTVYFG	1.18294
DNA PK	DNA damage kinase group	0.3192	0.000185721	ITA5_HUMAN (swissprot)	T237	QGQILSAtQEQIAES	2.32572
DNA PK	DNA damage kinase group	0.5165	0.00947428	ITA5_HUMAN (swissprot)	T420	GAPFGGEtQQGVVFV	1.68241
DNA PK	DNA damage kinase group	0.3979	0.00121554	ITA6_HUMAN (swissprot)	T588	QGSEPKYtQELTLKR	2.56339
DNA PK	DNA damage kinase group	0.4179	0.00174432	ITA8_HUMAN (swissprot)	S83	GAPKANTsQPDIVEG	3.31005
DNA PK	DNA damage kinase group	0.3904	0.0010561	ITA8_HUMAN (swissprot)	S280	AGEFTGDsQQELVAG	2.63627
DNA PK	DNA damage kinase group	0.4737	0.00474062	ITA9_HUMAN (swissprot)	S370	HFGESIAsLDDLDND	0.500185
DNA PK	DNA damage kinase group	0.4821	0.00542452	ITAV_HUMAN (swissprot)	T76	GAPKANTtQPGIVEG	2.1124
DNA PK	DNA damage kinase group	0.4494	0.00312134	ITB4_HUMAN (swissprot)	T301	GTYTQYRtQDYPSVP	4.59966
DNA PK	DNA damage kinase group	0.4983	0.00707016	ITB4_HUMAN (swissprot)	S1736	EGIITIEsQDGGPFP	1.06706
DNA PK	DNA damage kinase group	0.4608	0.00372631	ITB6_HUMAN (swissprot)	S80	NFIENPVsQVEILKN	0.784605
DNA PK	DNA damage kinase group	0.5082	0.00820631	ITB8_HUMAN (swissprot)	T116	PTENEINtQVTPGEV	0.718215
DNA PK	DNA damage kinase group	0.4552	0.00342913	TLN1_HUMAN (swissprot)	S1181	GHPGDPEsQQRLAQV	4.83113
DNA PK	DNA damage kinase group	0.4698	0.00442309	TLN1_HUMAN (swissprot)	S1294	EMAGQAPsQEDRAQV	2.40285
DNA PK	DNA damage kinase group	0.4935	0.00656914	TLN1_HUMAN (swissprot)	S1694	LAPREGIsQEALHTQ	0.645507
DNA PK	DNA damage kinase group	0.4761	0.00493602	TLN1_HUMAN (swissprot)	T1792	NPKQAAHtQEALEEA	1.37754
DNA PK	DNA damage kinase group	0.4935	0.00656914	TLN1_HUMAN (swissprot)	S2040	LVQNAAGsQEKLAQA	1.84159
DNA PK	DNA damage kinase group	0.4523	0.00327524	TLN1_HUMAN (swissprot)	T2076	LGAEDPEtQVVLINA	0.844959
DNA PK	DNA damage kinase group	0.4041	0.00137946	TLN1_HUMAN (swissprot)	S2420	AAVQGHAsQEKLISS	2.53219
DNA PK	DNA damage kinase group	0.4576	0.0035565	ACTN1_HUMAN (swissprot)	S744	TRDAKGIsQEQMNEF	1.10658
DNA PK	DNA damage kinase group	0.5097	0.00843546	TENS1_HUMAN (swissprot)	S701	PEFPRAAsQQEIEQS	1.62801
DNA PK	DNA damage kinase group	0.4576	0.0035565	PAXI_HUMAN (swissprot)	S216	GLEDVRPsVESLLDE	1.60216
DNA PK	DNA damage kinase group	0.512	0.00878682	VINC_HUMAN (swissprot)	T65	GKETVQTtEDQILKR	4.1403
DNA PK	DNA damage kinase group	0.4133	0.0016227	PALLD_HUMAN (swissprot)	S35	PGLSAFLsQEEINKS	1.13913
DNA PK	DNA damage kinase group	0.4982	0.00705972	PALLD_HUMAN (swissprot)	S356	PSGSDTTsAEVFIEG	0.830615
DNA PK	DNA damage kinase group	0.4622	0.00380432	VINEX_HUMAN (swissprot)	T573	RTGFSFPtQEPRPQT	2.05372
DNA PK	DNA damage kinase group	0.4041	0.00137946	SRBS1_HUMAN (swissprot)	T344	GEQDSAPtQEKPTSP	3.09883
DNA PK	DNA damage kinase group	0.4561	0.0034769	SRBS1_HUMAN (swissprot)	S1230	TPDRSQTsQDLFSYQ	1.83074
DNA PK	DNA damage kinase group	0.5097	0.00843546	ASAP1_HUMAN (swissprot)	T278	DLYNIKQtQDEEKKQ	5.73727
DNA PK	DNA damage kinase group	0.4906	0.00626645	PK3CA_HUMAN (swissprot)	T74	SYIFVSVtQEAEREE	0.996738
DNA PK	DNA damage kinase group	0.479	0.00517213	BCAR1_HUMAN (swissprot)	T572	GRGGSGAtLEDLDRL	0.788628
DNA PK	DNA damage kinase group	0.4561	0.0034769	BCAR1_HUMAN (swissprot)	S645	PSPPKFTsQDSPDGQ	1.48748
DNA PK	DNA damage kinase group	0.471	0.00452079	BCAR1_HUMAN (swissprot)	T678	GKEEFEKtQKELLEK	6.87056
DNA PK	DNA damage kinase group	0.4117	0.0015804	KPCA_HUMAN (swissprot)	S13	PGNDSTAsQDVANRF	0.961141
Crk SH3	Src homology 3 group	0.4299	0.00454252	ITA6_HUMAN (swissprot)	P724	VTNSPSNpRNPTKDG	4.0109
Crk SH3	Src homology 3 group	0.3962	0.00206169	TENS1_HUMAN (swissprot)	P630	SEAEPQLpPAPVRGG	1.22245
Crk SH3	Src homology 3 group	0.415	0.00337507	FAK1_HUMAN (swissprot)	P873	KPDPAAPpKKPPRPG	3.42323
Crk SH3	Src homology 3 group	0.4519	0.00651228	PAXI_HUMAN (swissprot)	P47	YQEIAVPpPVPPPPS	0.72171
Crk SH3	Src homology 3 group	0.379	0.00154584	PAXI_HUMAN (swissprot)	P324	KTGSSSPpGGPPKPG	1.11197
Crk SH3	Src homology 3 group	0.431	0.00462871	VASP_HUMAN (swissprot)	P122	GGGPPPPpALPTWSV	1.09147
Crk SH3	Src homology 3 group	0.4614	0.00820615	VASP_HUMAN (swissprot)	P162	RVSNAGGpPAPPAGG	0.838253
Crk SH3	Src homology 3 group	0.4564	0.00731464	VASP_HUMAN (swissprot)	P173	PAGGPPPpPGPPPPP	2.00475
Crk SH3	Src homology 3 group	0.4194	0.00371982	VASP_HUMAN (swissprot)	P186	PPGPPPPpGLPPSGV	1.0692
Crk SH3	Src homology 3 group	0.4049	0.00258372	VASP_HUMAN (swissprot)	P208	GGGPPPApPLPAAQG	1.09147
Crk SH3	Src homology 3 group	0.4547	0.00701153	VINC_HUMAN (swissprot)	P861	LTDELAPpKPPLPEG	2.64683
Crk SH3	Src homology 3 group	0.4342	0.00487943	PALLD_HUMAN (swissprot)	P800	GSSSPSPpPPPPPVF	2.71477
Crk SH3	Src homology 3 group	0.4679	0.00936511	PALLD_HUMAN (swissprot)	P802	SSPSPPPpPPPVFSP	3.13242
Crk SH3	Src homology 3 group	0.4487	0.00601554	PALLD_HUMAN (swissprot)	P826	FPLPPPPpPLPSPGQ	1.67063
Crk SH3	Src homology 3 group	0.4392	0.00527119	ASAP1_HUMAN (swissprot)	P791	TSPTTEApPLPPRNA	1.22245
Crk SH3	Src homology 3 group	0.4547	0.00701153	BCAR1_HUMAN (swissprot)	P727	ANWTPAQpLAPGRTG	0.798669
Crk SH2	Src homology 2 group	0.443	0.0083691	ITA1_HUMAN (swissprot)	Y80	KNRTGDVyKCPVGRG	0.737769
Crk SH2	Src homology 2 group	0.42	0.00562895	ITB1_HUMAN (swissprot)	Y314	MYTMSHYyDYPSIAH	3.09773
Crk SH2	Src homology 2 group	0.4248	0.0061288	ACTN1_HUMAN (swissprot)	Y467	ELNELDYyDSPSVNA	3.25151
Crk SH2	Src homology 2 group	0.3862	0.00283255	TENS1_HUMAN (swissprot)	Y222	PVYTSGIyNIPGDSQ	0.450891
Crk SH2	Src homology 2 group	0.4506	0.00951094	PAXI_HUMAN (swissprot)	Y31	FLSEETPySYPTGNH	2.6018
Crk SH2	Src homology 2 group	0.3979	0.0035158	PAXI_HUMAN (swissprot)	Y118	VGEEEHVySFPNKQK	0.650724
Crk SH2	Src homology 2 group	0.449	0.00927055	CAV1_HUMAN (swissprot)	Y14	VDSEGHLyTVPIREQ	0.667409
Crk SH2	Src homology 2 group	0.3585	0.00149305	SRBS1_HUMAN (swissprot)	Y419	ENPYFPTyKFPELPE	2.14569
Crk SH2	Src homology 2 group	0.3467	0.00113169	SRBS1_HUMAN (swissprot)	Y441	DNPYTPTyQFPASTP	1.85813
Crk SH2	Src homology 2 group	0.4313	0.00680567	ASAP1_HUMAN (swissprot)	Y38	IAETTEDyNSPTTSS	3.59377
Crk SH2	Src homology 2 group	0.3797	0.00245296	BCAR1_HUMAN (swissprot)	Y115	QPQPDSVyLVPTPSK	0.338038
Crk SH2	Src homology 2 group	0.3679	0.00178092	BCAR1_HUMAN (swissprot)	Y128	SKAQQGLyQVPGPSP	0.582466
Crk SH2	Src homology 2 group	0.3004	0.000286793	BCAR1_HUMAN (swissprot)	Y165	PSPATDLyQVPPGPG	0.982911
Crk SH2	Src homology 2 group	0.2986	0.000279402	BCAR1_HUMAN (swissprot)	Y179	GGPAQDIyQVPPSAG	0.835475
Crk SH2	Src homology 2 group	0.3313	0.000720306	BCAR1_HUMAN (swissprot)	Y192	AGMGHDIyQVPPSMD	0.835475
Crk SH2	Src homology 2 group	0.3933	0.00324717	BCAR1_HUMAN (swissprot)	Y234	AQPEQDEyDIPRHLL	1.87982
Crk SH2	Src homology 2 group	0.2612	0.000134185	BCAR1_HUMAN (swissprot)	Y249	APGPQDIyDVPPVRG	0.805636
Crk SH2	Src homology 2 group	0.3045	0.000334392	BCAR1_HUMAN (swissprot)	Y267	SQYGQEVyDTPPMAV	1.72009
Crk SH2	Src homology 2 group	0.2458	8.9834e-05	BCAR1_HUMAN (swissprot)	Y287	RDPLLEVyDVPPSVE	0.88462
Crk SH2	Src homology 2 group	0.261	0.000133609	BCAR1_HUMAN (swissprot)	Y306	PSNHHAVyDVPPSVS	0.516028
Crk SH2	Src homology 2 group	0.342	0.000987751	BCAR1_HUMAN (swissprot)	Y327	PLLREETyDVPPAFA	1.72009
Crk SH2	Src homology 2 group	0.1754	6.0719e-06	BCAR1_HUMAN (swissprot)	Y362	SPPAEDVyDVPPPAP	0.853027
Crk SH2	Src homology 2 group	0.2883	0.00023711	BCAR1_HUMAN (swissprot)	Y372	PPPAPDLyDVPPGLR	0.947807
Crk SH2	Src homology 2 group	0.3816	0.00256392	BCAR1_HUMAN (swissprot)	Y387	RPGPGTLyDVPRERV	0.819093
Crk SH2	Src homology 2 group	0.3631	0.00163393	BCAR1_HUMAN (swissprot)	Y410	GVVDSGVyAVPPPAE	0.305795
Crk SH2	Src homology 2 group	0.3487	0.00119293	KPCA_HUMAN (swissprot)	Y286	NQEEGEYyNVPIPEG	1.86753
Cortactin SH3	Src homology 3 group	0.5524	0.00598814	FLNA_HUMAN (swissprot)	P1241	KYGGQPVpNFPSKLQ	0.909355
Cortactin SH3	Src homology 3 group	0.5398	0.00447648	TENS1_HUMAN (swissprot)	P630	SEAEPQLpPAPVRGG	1.22245
Cortactin SH3	Src homology 3 group	0.5569	0.00653279	FAK1_HUMAN (swissprot)	P712	SGGSDEApPKPSRPG	2.96445
Cortactin SH3	Src homology 3 group	0.55	0.00569767	FAK1_HUMAN (swissprot)	P715	SDEAPPKpSRPGYPS	4.44739
Cortactin SH3	Src homology 3 group	0.5735	0.00854193	FAK1_HUMAN (swissprot)	P876	PAAPPKKpPRPGAPG	6.63687
Cortactin SH3	Src homology 3 group	0.4744	0.00125791	FAK1_HUMAN (swissprot)	P879	PPKKPPRpGAPGHLG	1.65904
Cortactin SH3	Src homology 3 group	0.4701	0.00114509	PAXI_HUMAN (swissprot)	P50	IAVPPPVpPPPSSEA	1.50356
Cortactin SH3	Src homology 3 group	0.5264	0.00363751	PAXI_HUMAN (swissprot)	P327	SSSPPGGpPKPGSQL	1.6594
Cortactin SH3	Src homology 3 group	0.5238	0.00347472	VASP_HUMAN (swissprot)	P122	GGGPPPPpALPTWSV	1.09147
Cortactin SH3	Src homology 3 group	0.5592	0.00681116	VASP_HUMAN (swissprot)	P173	PAGGPPPpPGPPPPP	2.00475
Cortactin SH3	Src homology 3 group	0.5744	0.00865086	VASP_HUMAN (swissprot)	P176	GPPPPPGpPPPPGPP	2.00475
Cortactin SH3	Src homology 3 group	0.5837	0.00997878	VASP_HUMAN (swissprot)	P179	PPPGPPPpPGPPPPP	2.00475
Cortactin SH3	Src homology 3 group	0.4868	0.00158326	VASP_HUMAN (swissprot)	P182	GPPPPPGpPPPPGLP	2.00475
Cortactin SH3	Src homology 3 group	0.5163	0.00300514	VASP_HUMAN (swissprot)	P208	GGGPPPApPLPAAQG	1.09147
Cortactin SH3	Src homology 3 group	0.5744	0.00865086	VINC_HUMAN (swissprot)	P875	GEVPPPRpPPPEEKD	3.96773
Cortactin SH3	Src homology 3 group	0.5819	0.00959002	ZYX_HUMAN (swissprot)	P74	PPEDFPLpPPPLAGD	1.67063
Cortactin SH3	Src homology 3 group	0.5514	0.00586711	PALLD_HUMAN (swissprot)	P689	PRSAPPSpPFPPPPA	1.52027
Cortactin SH3	Src homology 3 group	0.5694	0.00804569	PALLD_HUMAN (swissprot)	P692	APPSPPFpPPPAFPE	1.75416
Cortactin SH3	Src homology 3 group	0.5473	0.00537088	PALLD_HUMAN (swissprot)	P778	QFGRAPVpPFAQPFG	0.550103
Cortactin SH3	Src homology 3 group	0.5264	0.00363751	PALLD_HUMAN (swissprot)	P802	SSPSPPPpPPPVFSP	3.13242
Cortactin SH3	Src homology 3 group	0.4942	0.00177742	PALLD_HUMAN (swissprot)	P822	VPDVFPLpPPPPPLP	1.67063
Cortactin SH3	Src homology 3 group	0.5514	0.00586711	PALLD_HUMAN (swissprot)	P826	FPLPPPPpPLPSPGQ	1.67063
Cortactin SH3	Src homology 3 group	0.568	0.00787625	SRBS1_HUMAN (swissprot)	P182	GTARPPTpLGPLGCV	0.99792
Cortactin SH3	Src homology 3 group	0.5255	0.00358116	SRBS1_HUMAN (swissprot)	P249	SPPPPLVpPAPEDLR	0.523908
Cortactin SH3	Src homology 3 group	0.5269	0.00366881	SRBS1_HUMAN (swissprot)	P1008	LALTPPLpPLPEASI	0.891
Cortactin SH3	Src homology 3 group	0.5615	0.00708954	ASAP1_HUMAN (swissprot)	P794	TTEAPPLpPRNAGKG	2.28541
Cortactin SH3	Src homology 3 group	0.4979	0.0018745	ASAP1_HUMAN (swissprot)	P940	KPPPGDLpPKPTELA	2.33353
Cortactin SH3	Src homology 3 group	0.4878	0.0016095	ASAP1_HUMAN (swissprot)	P956	KPQIGDLpPKPGELP	2.33353
Cortactin SH3	Src homology 3 group	0.5754	0.00877189	ASAP1_HUMAN (swissprot)	P972	KPQLGDLpPKPQLSD	2.33353
Cortactin SH3	Src homology 3 group	0.5754	0.00877189	ASAP1_HUMAN (swissprot)	P981	KPQLSDLpPKPQMKD	2.33353
Cortactin SH3	Src homology 3 group	0.5754	0.00877189	ASAP1_HUMAN (swissprot)	P990	KPQMKDLpPKPQLGD	2.33353
Cortactin SH3	Src homology 3 group	0.5823	0.00967641	ASAP1_HUMAN (swissprot)	P1052	NDLTPTLpETPVPLP	1.62994
Cortactin SH3	Src homology 3 group	0.5726	0.008433	PAK1_HUMAN (swissprot)	P42	NHGSKPLpPNPEEKK	1.80428
Cortactin SH3	Src homology 3 group	0.5519	0.00592763	CAN2_HUMAN (swissprot)	P52	LFQDPSFpAIPSALG	0.45027
Clk2 Kinase	Basophilic serine/threonine kinase	0.5715	0.00275791	ITB7_HUMAN (swissprot)	S759	IYDRREYsRFEKEQQ	2.44777
Clk2 Kinase	Basophilic serine/threonine kinase	0.6924	0.00933767	UROK_HUMAN (swissprot)	S204	YRRHRGGsVTYVCGG	0.504804
Clk2 Kinase	Basophilic serine/threonine kinase	0.6229	0.00450867	FLNA_HUMAN (swissprot)	S2152	TRRRRAPsVANVGSH	0.600713
Clk2 Kinase	Basophilic serine/threonine kinase	0.6657	0.00697731	FAK1_HUMAN (swissprot)	S695	EERMRMEsRRQATVS	3.49682
Clk2 Kinase	Basophilic serine/threonine kinase	0.5111	0.00164915	PALLD_HUMAN (swissprot)	S1116	PHVRRPRsRSRDSGD	4.78158
Clk2 Kinase	Basophilic serine/threonine kinase	0.3971	0.00059462	PALLD_HUMAN (swissprot)	S1118	VRRPRSRsRDSGDEN	3.53334
Clk2 Kinase	Basophilic serine/threonine kinase	0.6688	0.00722069	SRBS1_HUMAN (swissprot)	S77	AVTLRASsSYRETPS	1.70996
Clk2 Kinase	Basophilic serine/threonine kinase	0.6941	0.00951222	SRBS1_HUMAN (swissprot)	S363	EKRAKDDsRRVVKST	2.43863
Clk2 Kinase	Basophilic serine/threonine kinase	0.6581	0.00646249	ASAP1_HUMAN (swissprot)	S10	SSASRLSsFSSRDSL	0.527807
Clk2 Kinase	Basophilic serine/threonine kinase	0.6187	0.00431871	AKT1_HUMAN (swissprot)	S246	LSRERVFsEDRARFY	1.11806
Clk2 Kinase	Basophilic serine/threonine kinase	0.6666	0.00703881	SRC_HUMAN (swissprot)	S161	GKITRREsERLLLNA	2.91402
Cdk5 Kinase	Proline-dependent serine/threonine kinase group	0.1655	2.23077e-05	ITA3_HUMAN (swissprot)	S869	DPGDRPSsPQRRRRQ	3.33783
Cdk5 Kinase	Proline-dependent serine/threonine kinase group	0.4809	0.0094495	ITA4_HUMAN (swissprot)	S529	DVNRKAEsPPRFYFS	2.51621
Cdk5 Kinase	Proline-dependent serine/threonine kinase group	0.4837	0.00980469	ITA5_HUMAN (swissprot)	S8	MGSRTPEsPLHAVQL	1.42703
Cdk5 Kinase	Proline-dependent serine/threonine kinase group	0.4041	0.00307002	ITA7_HUMAN (swissprot)	T643	TLSYSLQtPRLRRQA	1.17976
Cdk5 Kinase	Proline-dependent serine/threonine kinase group	0.4035	0.00304296	ITA7_HUMAN (swissprot)	S1150	ILRNNWGsPRREGPD	1.8956
Cdk5 Kinase	Proline-dependent serine/threonine kinase group	0.4735	0.00852279	ITA9_HUMAN (swissprot)	T597	ERELPPLtPVLRWKK	0.399168
Cdk5 Kinase	Proline-dependent serine/threonine kinase group	0.4695	0.00813163	ITAV_HUMAN (swissprot)	S548	ALFLYSRsPSHSKNM	2.27291
Cdk5 Kinase	Proline-dependent serine/threonine kinase group	0.3634	0.0015921	ITB1_HUMAN (swissprot)	S474	QSEGIPEsPKCHEGN	1.36324
Cdk5 Kinase	Proline-dependent serine/threonine kinase group	0.4634	0.00753513	ITB7_HUMAN (swissprot)	T643	DQCPGCKtPCERHRD	0.508944
Cdk5 Kinase	Proline-dependent serine/threonine kinase group	0.452	0.00642781	SHPS1_HUMAN (swissprot)	T161	SGPAARAtPQHTVSF	2.3846
Cdk5 Kinase	Proline-dependent serine/threonine kinase group	0.4388	0.00540187	TLN1_HUMAN (swissprot)	S425	TMLEDSVsPKKSTVL	1.88906
Cdk5 Kinase	Proline-dependent serine/threonine kinase group	0.452	0.00642781	FLNA_HUMAN (swissprot)	T167	DEEAKKQtPKQRLLG	6.13443
Cdk5 Kinase	Proline-dependent serine/threonine kinase group	0.4502	0.00628791	FLNA_HUMAN (swissprot)	S860	ADQATPTsPIRVKVE	1.45495
Cdk5 Kinase	Proline-dependent serine/threonine kinase group	0.4707	0.00824898	FLNA_HUMAN (swissprot)	S1084	LQGGSAGsPARFTID	0.939386
Cdk5 Kinase	Proline-dependent serine/threonine kinase group	0.4455	0.00592261	FLNA_HUMAN (swissprot)	S1148	ADTHIPGsPFKAHVV	1.25838
Cdk5 Kinase	Proline-dependent serine/threonine kinase group	0.4717	0.00834677	FLNA_HUMAN (swissprot)	S1436	GGHQVPGsPFKVPVH	1.25838
Cdk5 Kinase	Proline-dependent serine/threonine kinase group	0.4457	0.00593816	FLNA_HUMAN (swissprot)	S1533	GDEEVPRsPFKVKVL	2.49054
Cdk5 Kinase	Proline-dependent serine/threonine kinase group	0.4559	0.00680172	FLNA_HUMAN (swissprot)	S1630	GGDEIPFsPYRVRAV	1.95135
Cdk5 Kinase	Proline-dependent serine/threonine kinase group	0.3643	0.00161273	FLNA_HUMAN (swissprot)	S2414	NGTHIPGsPFKIRVG	1.25838
Cdk5 Kinase	Proline-dependent serine/threonine kinase group	0.4223	0.00419703	FLNA_HUMAN (swissprot)	S2510	GPYHIGGsPFKAKVT	0.805361
Cdk5 Kinase	Proline-dependent serine/threonine kinase group	0.4064	0.00317378	FLNA_HUMAN (swissprot)	S2640	GDEHIPGsPYRVVVP	2.23011
Cdk5 Kinase	Proline-dependent serine/threonine kinase group	0.478	0.00908162	TENS1_HUMAN (swissprot)	S433	SSATAALsPQEKREL	1.18659
Cdk5 Kinase	Proline-dependent serine/threonine kinase group	0.4481	0.00612469	TENS1_HUMAN (swissprot)	S915	PEATSPRsPGVRSPV	1.05637
Cdk5 Kinase	Proline-dependent serine/threonine kinase group	0.3472	0.00122082	TENS1_HUMAN (swissprot)	S1177	GVHTVPGsPQARHRT	1.27135
Cdk5 Kinase	Proline-dependent serine/threonine kinase group	0.477	0.00895476	TENS1_HUMAN (swissprot)	T1328	VAYGGYStPEDRRPT	3.10573
Cdk5 Kinase	Proline-dependent serine/threonine kinase group	0.4202	0.00405291	FAK1_HUMAN (swissprot)	S732	SSEGFYPsPQHMVQT	2.71135
Cdk5 Kinase	Proline-dependent serine/threonine kinase group	0.4827	0.00967784	PAXI_HUMAN (swissprot)	S106	NPQDSVGsPCSRVGE	0.250563
Cdk5 Kinase	Proline-dependent serine/threonine kinase group	0.4145	0.00366173	PAXI_HUMAN (swissprot)	S244	VNQGEMSsPQRVTST	2.13621
Cdk5 Kinase	Proline-dependent serine/threonine kinase group	0.3856	0.00226496	PARVA_HUMAN (swissprot)	S14	KSPSVPKsPTPKSPP	3.27702
Cdk5 Kinase	Proline-dependent serine/threonine kinase group	0.2559	0.000202238	PARVA_HUMAN (swissprot)	S19	PKSPTPKsPPSRKKD	3.04295
Cdk5 Kinase	Proline-dependent serine/threonine kinase group	0.4202	0.00405291	PALLD_HUMAN (swissprot)	S115	KQTKSISsPVSKRKP	0.443706
Cdk5 Kinase	Proline-dependent serine/threonine kinase group	0.3127	0.000661352	PALLD_HUMAN (swissprot)	T156	STNVKPKtPHQRKGG	3.72673
Cdk5 Kinase	Proline-dependent serine/threonine kinase group	0.4839	0.00983007	PALLD_HUMAN (swissprot)	S236	EMEREVKsPGARHCY	0.704691
Cdk5 Kinase	Proline-dependent serine/threonine kinase group	0.464	0.0075938	PALLD_HUMAN (swissprot)	S766	SSLPSPMsPTPRQFG	1.62162
Cdk5 Kinase	Proline-dependent serine/threonine kinase group	0.4493	0.00621796	PALLD_HUMAN (swissprot)	S1104	QRGRSPRsPSGHPHV	1.90733
Cdk5 Kinase	Proline-dependent serine/threonine kinase group	0.4315	0.0048345	VINEX_HUMAN (swissprot)	T64	TVCNGGYtPRRDASQ	3.0421
Cdk5 Kinase	Proline-dependent serine/threonine kinase group	0.4827	0.00967784	VINEX_HUMAN (swissprot)	S303	RLPSPKSsPAPRRAP	1.98806
Cdk5 Kinase	Proline-dependent serine/threonine kinase group	0.34	0.00108242	VINEX_HUMAN (swissprot)	S373	SASNGGGsPARREEK	0.920215
Cdk5 Kinase	Proline-dependent serine/threonine kinase group	0.4025	0.00299785	VINEX_HUMAN (swissprot)	S563	IDLGGQTsPRRTGFS	4.55315
Cdk5 Kinase	Proline-dependent serine/threonine kinase group	0.4752	0.00872642	VINEX_HUMAN (swissprot)	T615	NTSQIHWtPYRAMYQ	2.24555
Cdk5 Kinase	Proline-dependent serine/threonine kinase group	0.477	0.00895476	SRBS1_HUMAN (swissprot)	S89	TPSSSPAsPQETRQH	2.22486
Cdk5 Kinase	Proline-dependent serine/threonine kinase group	0.4419	0.00564281	SRBS1_HUMAN (swissprot)	S350	PTQEKPTsPGKAIEK	2.0973
Cdk5 Kinase	Proline-dependent serine/threonine kinase group	0.4098	0.00333918	SRBS1_HUMAN (swissprot)	S713	ASTKDSEsPRHFIPA	2.93729
Cdk5 Kinase	Proline-dependent serine/threonine kinase group	0.3877	0.00233085	ASAP1_HUMAN (swissprot)	S726	DDLDDKPsPIKKERS	2.0586
Cdk5 Kinase	Proline-dependent serine/threonine kinase group	0.453	0.00651813	ASAP1_HUMAN (swissprot)	T758	LALPGFStPRDKQRL	1.94108
Cdk5 Kinase	Proline-dependent serine/threonine kinase group	0.426	0.00445095	FYN_HUMAN (swissprot)	T35	YRYGTDPtPQHYPSF	3.11201
Cdk5 Kinase	Proline-dependent serine/threonine kinase group	0.4378	0.00532415	SRC_HUMAN (swissprot)	S75	NSSDTVTsPQRAGPL	1.7254
Cdk5 Kinase	Proline-dependent serine/threonine kinase group	0.448	0.00611692	BCAR1_HUMAN (swissprot)	T152	TSTFSKQtPHHPFPS	3.27952
Cdk5 Kinase	Proline-dependent serine/threonine kinase group	0.439	0.00541742	BCAR1_HUMAN (swissprot)	S639	IQSRPLPsPPKFTSQ	1.87258
CDK1 motif 2 - [ST]PxxK	Proline-dependent serine/threonine kinase group	0.444	0.00998208	ITA2_HUMAN (swissprot)	S163	FQLSASFsPATQPCP	0.803423
CDK1 motif 2 - [ST]PxxK	Proline-dependent serine/threonine kinase group	0.4211	0.00732857	ITA3_HUMAN (swissprot)	S869	DPGDRPSsPQRRRRQ	3.33783
CDK1 motif 2 - [ST]PxxK	Proline-dependent serine/threonine kinase group	0.422	0.00741676	ITA6_HUMAN (swissprot)	S720	LEITVTNsPSNPRNP	2.56135
CDK1 motif 2 - [ST]PxxK	Proline-dependent serine/threonine kinase group	0.3408	0.002178	ITA9_HUMAN (swissprot)	S75	PKADSKYsPSVKSPG	1.48009
CDK1 motif 2 - [ST]PxxK	Proline-dependent serine/threonine kinase group	0.4262	0.00786546	ITAV_HUMAN (swissprot)	S548	ALFLYSRsPSHSKNM	2.27291
CDK1 motif 2 - [ST]PxxK	Proline-dependent serine/threonine kinase group	0.4208	0.00729917	ITB1_HUMAN (swissprot)	T199	VMPYISTtPAKLRNP	1.99826
CDK1 motif 2 - [ST]PxxK	Proline-dependent serine/threonine kinase group	0.4334	0.00867452	ITB4_HUMAN (swissprot)	T1434	GSLPRSAtPGPPGEH	1.05946
CDK1 motif 2 - [ST]PxxK	Proline-dependent serine/threonine kinase group	0.4189	0.007113	ITB4_HUMAN (swissprot)	T1530	LTAGVPDtPTRLVFS	3.73284
CDK1 motif 2 - [ST]PxxK	Proline-dependent serine/threonine kinase group	0.2828	0.000920401	FLNA_HUMAN (swissprot)	S2180	DMTAQVTsPSGKTHE	0.674594
CDK1 motif 2 - [ST]PxxK	Proline-dependent serine/threonine kinase group	0.4317	0.00848349	TENS1_HUMAN (swissprot)	S742	PGAWPGAsPLSSQPL	0.524684
CDK1 motif 2 - [ST]PxxK	Proline-dependent serine/threonine kinase group	0.4414	0.0096498	TENS1_HUMAN (swissprot)	S813	NQDFHSKsPASSSLP	1.72299
CDK1 motif 2 - [ST]PxxK	Proline-dependent serine/threonine kinase group	0.4089	0.00615927	TENS1_HUMAN (swissprot)	S1232	FHGSTVSsPQSSAAT	1.09622
CDK1 motif 2 - [ST]PxxK	Proline-dependent serine/threonine kinase group	0.3764	0.00379052	TENS1_HUMAN (swissprot)	T1240	PQSSAATtPGSPSLC	0.988828
CDK1 motif 2 - [ST]PxxK	Proline-dependent serine/threonine kinase group	0.408	0.0060836	TENS1_HUMAN (swissprot)	S1294	LHSNAIAsPGSPSLG	0.445982
CDK1 motif 2 - [ST]PxxK	Proline-dependent serine/threonine kinase group	0.4292	0.00820257	TENS1_HUMAN (swissprot)	S1369	GLSSPATsPSPDSAA	1.43468
CDK1 motif 2 - [ST]PxxK	Proline-dependent serine/threonine kinase group	0.4408	0.00957312	TENS1_HUMAN (swissprot)	S1381	SAAFRQGsPTPALPE	1.81621
CDK1 motif 2 - [ST]PxxK	Proline-dependent serine/threonine kinase group	0.439	0.00934308	PTPRA_HUMAN (swissprot)	S211	SVPLLARsPSTNRKY	1.81727
CDK1 motif 2 - [ST]PxxK	Proline-dependent serine/threonine kinase group	0.3836	0.00421501	PAXI_HUMAN (swissprot)	S106	NPQDSVGsPCSRVGE	0.250563
CDK1 motif 2 - [ST]PxxK	Proline-dependent serine/threonine kinase group	0.3819	0.00411478	VASP_HUMAN (swissprot)	T335	TSETQPCtPSSSDYS	0.761261
CDK1 motif 2 - [ST]PxxK	Proline-dependent serine/threonine kinase group	0.2249	0.000355513	PARVA_HUMAN (swissprot)	S14	KSPSVPKsPTPKSPP	3.27702
CDK1 motif 2 - [ST]PxxK	Proline-dependent serine/threonine kinase group	0.4422	0.00975204	PARVA_HUMAN (swissprot)	T16	PSVPKSPtPKSPPSR	2.84009
CDK1 motif 2 - [ST]PxxK	Proline-dependent serine/threonine kinase group	0.4329	0.00861834	VINC_HUMAN (swissprot)	T604	DVFSDTTtPIKLLAV	1.4932
CDK1 motif 2 - [ST]PxxK	Proline-dependent serine/threonine kinase group	0.3965	0.00513307	ZYX_HUMAN (swissprot)	S308	ALSAGTGsPQPPSFT	1.81621
CDK1 motif 2 - [ST]PxxK	Proline-dependent serine/threonine kinase group	0.1891	0.000168006	PALLD_HUMAN (swissprot)	S115	KQTKSISsPVSKRKP	0.443706
CDK1 motif 2 - [ST]PxxK	Proline-dependent serine/threonine kinase group	0.4074	0.00603316	PALLD_HUMAN (swissprot)	S401	SLTIGSSsPKTGVTT	2.46141
CDK1 motif 2 - [ST]PxxK	Proline-dependent serine/threonine kinase group	0.4182	0.0070444	PALLD_HUMAN (swissprot)	T751	GPASGHGtPASSPSS	0.932323
CDK1 motif 2 - [ST]PxxK	Proline-dependent serine/threonine kinase group	0.3506	0.00254645	PALLD_HUMAN (swissprot)	S755	GHGTPASsPSSSSLP	1.15458
CDK1 motif 2 - [ST]PxxK	Proline-dependent serine/threonine kinase group	0.4341	0.00875318	PALLD_HUMAN (swissprot)	S763	PSSSSLPsPMSPTPR	0.803088
CDK1 motif 2 - [ST]PxxK	Proline-dependent serine/threonine kinase group	0.4105	0.00629378	PALLD_HUMAN (swissprot)	S766	SSLPSPMsPTPRQFG	1.62162
CDK1 motif 2 - [ST]PxxK	Proline-dependent serine/threonine kinase group	0.4175	0.00697581	PALLD_HUMAN (swissprot)	S796	EAPWGSSsPSPPPPP	1.76721
CDK1 motif 2 - [ST]PxxK	Proline-dependent serine/threonine kinase group	0.316	0.00150428	PALLD_HUMAN (swissprot)	S839	GQASHCSsPATRFGH	0.497357
CDK1 motif 2 - [ST]PxxK	Proline-dependent serine/threonine kinase group	0.4425	0.00979038	PALLD_HUMAN (swissprot)	S1101	AVNQRGRsPRSPSGH	2.41596
CDK1 motif 2 - [ST]PxxK	Proline-dependent serine/threonine kinase group	0.4301	0.0083037	VINEX_HUMAN (swissprot)	S303	RLPSPKSsPAPRRAP	1.98806
CDK1 motif 2 - [ST]PxxK	Proline-dependent serine/threonine kinase group	0.396	0.00509668	VINEX_HUMAN (swissprot)	S339	LGSARSLsPHKMADG	1.42816
CDK1 motif 2 - [ST]PxxK	Proline-dependent serine/threonine kinase group	0.3953	0.00504573	VINEX_HUMAN (swissprot)	S373	SASNGGGsPARREEK	0.920215
CDK1 motif 2 - [ST]PxxK	Proline-dependent serine/threonine kinase group	0.4138	0.00661325	VINEX_HUMAN (swissprot)	S606	PLDLGTSsPNTSQIH	2.21351
CDK1 motif 2 - [ST]PxxK	Proline-dependent serine/threonine kinase group	0.4034	0.00569687	SRBS1_HUMAN (swissprot)	T82	ASSSYREtPSSSPAS	3.11531
CDK1 motif 2 - [ST]PxxK	Proline-dependent serine/threonine kinase group	0.365	0.00318566	SRBS1_HUMAN (swissprot)	S86	YRETPSSsPASPQET	1.15458
CDK1 motif 2 - [ST]PxxK	Proline-dependent serine/threonine kinase group	0.2213	0.000330268	SRBS1_HUMAN (swissprot)	T447	TYQFPAStPSPKSED	1.43468
CDK1 motif 2 - [ST]PxxK	Proline-dependent serine/threonine kinase group	0.4291	0.00819133	SRBS1_HUMAN (swissprot)	S449	QFPASTPsPKSEDDD	2.84009
CDK1 motif 2 - [ST]PxxK	Proline-dependent serine/threonine kinase group	0.4437	0.00994374	SRBS1_HUMAN (swissprot)	S640	VPQSSAIsPTPEISS	0.75045
CDK1 motif 2 - [ST]PxxK	Proline-dependent serine/threonine kinase group	0.4396	0.00941976	SRBS1_HUMAN (swissprot)	T964	SSHSKLItPAPSSLP	0.461815
CDK1 motif 2 - [ST]PxxK	Proline-dependent serine/threonine kinase group	0.4178	0.00700521	SRBS1_HUMAN (swissprot)	T1082	NGDGGVHtPSSGIHQ	0.927567
CDK1 motif 2 - [ST]PxxK	Proline-dependent serine/threonine kinase group	0.3047	0.00128593	ASAP1_HUMAN (swissprot)	S525	IMEANLPsPSPKPTP	1.25483
CDK1 motif 2 - [ST]PxxK	Proline-dependent serine/threonine kinase group	0.4066	0.0059659	ASAP1_HUMAN (swissprot)	S726	DDLDDKPsPIKKERS	2.0586
CDK1 motif 2 - [ST]PxxK	Proline-dependent serine/threonine kinase group	0.4103	0.00627697	ASAP1_HUMAN (swissprot)	S746	FCHSSSIsPQDKLAL	1.29016
CDK1 motif 2 - [ST]PxxK	Proline-dependent serine/threonine kinase group	0.2652	0.0006991	ASAP1_HUMAN (swissprot)	S782	FVSTSTDsPTSPTTE	2.21351
CDK1 motif 2 - [ST]PxxK	Proline-dependent serine/threonine kinase group	0.4223	0.00744616	ASAP1_HUMAN (swissprot)	S785	TSTDSPTsPTTEAPP	2.2072
CDK1 motif 2 - [ST]PxxK	Proline-dependent serine/threonine kinase group	0.3818	0.00410889	SRC_HUMAN (swissprot)	T37	GAFPASQtPSKPASA	3.1809
CDK1 motif 2 - [ST]PxxK	Proline-dependent serine/threonine kinase group	0.4302	0.00831494	BCAR1_HUMAN (swissprot)	S139	GPSPQFQsPPAKQTS	1.11243
CDK1 motif 1 - [ST]Px[KR]x	Proline-dependent serine/threonine kinase group	0.2739	0.00179425	ITA3_HUMAN (swissprot)	S869	DPGDRPSsPQRRRRQ	3.33783
CDK1 motif 1 - [ST]Px[KR]x	Proline-dependent serine/threonine kinase group	0.2998	0.0025872	ITA6_HUMAN (swissprot)	T516	IQKTITVtPNRIDLR	1.79177
CDK1 motif 1 - [ST]Px[KR]x	Proline-dependent serine/threonine kinase group	0.3262	0.00348935	ITA7_HUMAN (swissprot)	S413	GGHWAGIsPLRLCGS	0.532097
CDK1 motif 1 - [ST]Px[KR]x	Proline-dependent serine/threonine kinase group	0.3559	0.00453344	ITA7_HUMAN (swissprot)	S1150	ILRNNWGsPRREGPD	1.8956
CDK1 motif 1 - [ST]Px[KR]x	Proline-dependent serine/threonine kinase group	0.4189	0.00758614	ITA8_HUMAN (swissprot)	T162	HWRTLKPtPEKDPVG	5.47717
CDK1 motif 1 - [ST]Px[KR]x	Proline-dependent serine/threonine kinase group	0.3521	0.00438762	ITA8_HUMAN (swissprot)	S185	FSAYAEFsPCRNSNA	0.747675
CDK1 motif 1 - [ST]Px[KR]x	Proline-dependent serine/threonine kinase group	0.3545	0.00447972	ITA8_HUMAN (swissprot)	S917	VVEFHRQsPAKILNC	3.2543
CDK1 motif 1 - [ST]Px[KR]x	Proline-dependent serine/threonine kinase group	0.261	0.00144161	ITB1_HUMAN (swissprot)	T199	VMPYISTtPAKLRNP	1.99826
CDK1 motif 1 - [ST]Px[KR]x	Proline-dependent serine/threonine kinase group	0.2718	0.00173601	ITB4_HUMAN (swissprot)	T1530	LTAGVPDtPTRLVFS	3.73284
CDK1 motif 1 - [ST]Px[KR]x	Proline-dependent serine/threonine kinase group	0.335	0.00380436	FLNA_HUMAN (swissprot)	S860	ADQATPTsPIRVKVE	1.45495
CDK1 motif 1 - [ST]Px[KR]x	Proline-dependent serine/threonine kinase group	0.3404	0.00399222	FLNA_HUMAN (swissprot)	S1084	LQGGSAGsPARFTID	0.939386
CDK1 motif 1 - [ST]Px[KR]x	Proline-dependent serine/threonine kinase group	0.3794	0.00550024	FLNA_HUMAN (swissprot)	S1148	ADTHIPGsPFKAHVV	1.25838
CDK1 motif 1 - [ST]Px[KR]x	Proline-dependent serine/threonine kinase group	0.4309	0.00847114	FLNA_HUMAN (swissprot)	S1436	GGHQVPGsPFKVPVH	1.25838
CDK1 motif 1 - [ST]Px[KR]x	Proline-dependent serine/threonine kinase group	0.3947	0.00622748	FLNA_HUMAN (swissprot)	S2414	NGTHIPGsPFKIRVG	1.25838
CDK1 motif 1 - [ST]Px[KR]x	Proline-dependent serine/threonine kinase group	0.4031	0.00664215	FLNA_HUMAN (swissprot)	S2510	GPYHIGGsPFKAKVT	0.805361
CDK1 motif 1 - [ST]Px[KR]x	Proline-dependent serine/threonine kinase group	0.3424	0.004059	TENS1_HUMAN (swissprot)	S257	CYHKKFRsPARDVIF	1.5936
CDK1 motif 1 - [ST]Px[KR]x	Proline-dependent serine/threonine kinase group	0.4406	0.00923807	TENS1_HUMAN (swissprot)	S1232	FHGSTVSsPQSSAAT	1.09622
CDK1 motif 1 - [ST]Px[KR]x	Proline-dependent serine/threonine kinase group	0.4099	0.00702957	TENS1_HUMAN (swissprot)	T1240	PQSSAATtPGSPSLC	0.988828
CDK1 motif 1 - [ST]Px[KR]x	Proline-dependent serine/threonine kinase group	0.4398	0.00917482	TENS1_HUMAN (swissprot)	S1294	LHSNAIAsPGSPSLG	0.445982
CDK1 motif 1 - [ST]Px[KR]x	Proline-dependent serine/threonine kinase group	0.4167	0.00742585	PAXI_HUMAN (swissprot)	S106	NPQDSVGsPCSRVGE	0.250563
CDK1 motif 1 - [ST]Px[KR]x	Proline-dependent serine/threonine kinase group	0.382	0.00562181	PAXI_HUMAN (swissprot)	S244	VNQGEMSsPQRVTST	2.13621
CDK1 motif 1 - [ST]Px[KR]x	Proline-dependent serine/threonine kinase group	0.4151	0.00732623	VASP_HUMAN (swissprot)	T335	TSETQPCtPSSSDYS	0.761261
CDK1 motif 1 - [ST]Px[KR]x	Proline-dependent serine/threonine kinase group	0.4037	0.00667587	PARVA_HUMAN (swissprot)	S14	KSPSVPKsPTPKSPP	3.27702
CDK1 motif 1 - [ST]Px[KR]x	Proline-dependent serine/threonine kinase group	0.2724	0.00175236	VINC_HUMAN (swissprot)	T604	DVFSDTTtPIKLLAV	1.4932
CDK1 motif 1 - [ST]Px[KR]x	Proline-dependent serine/threonine kinase group	0.4289	0.00831474	ZYX_HUMAN (swissprot)	S308	ALSAGTGsPQPPSFT	1.81621
CDK1 motif 1 - [ST]Px[KR]x	Proline-dependent serine/threonine kinase group	0.3698	0.00508691	PALLD_HUMAN (swissprot)	S115	KQTKSISsPVSKRKP	0.443706
CDK1 motif 1 - [ST]Px[KR]x	Proline-dependent serine/threonine kinase group	0.4393	0.00913528	PALLD_HUMAN (swissprot)	S401	SLTIGSSsPKTGVTT	2.46141
CDK1 motif 1 - [ST]Px[KR]x	Proline-dependent serine/threonine kinase group	0.3552	0.00450658	PALLD_HUMAN (swissprot)	S641	PTPAVLLsPTKEPPP	0.932131
CDK1 motif 1 - [ST]Px[KR]x	Proline-dependent serine/threonine kinase group	0.3855	0.00578547	PALLD_HUMAN (swissprot)	S755	GHGTPASsPSSSSLP	1.15458
CDK1 motif 1 - [ST]Px[KR]x	Proline-dependent serine/threonine kinase group	0.4421	0.00935667	PALLD_HUMAN (swissprot)	S766	SSLPSPMsPTPRQFG	1.62162
CDK1 motif 1 - [ST]Px[KR]x	Proline-dependent serine/threonine kinase group	0.4488	0.00995963	PALLD_HUMAN (swissprot)	S796	EAPWGSSsPSPPPPP	1.76721
CDK1 motif 1 - [ST]Px[KR]x	Proline-dependent serine/threonine kinase group	0.3527	0.00441065	PALLD_HUMAN (swissprot)	S839	GQASHCSsPATRFGH	0.497357
CDK1 motif 1 - [ST]Px[KR]x	Proline-dependent serine/threonine kinase group	0.3802	0.00553764	VINEX_HUMAN (swissprot)	T64	TVCNGGYtPRRDASQ	3.0421
CDK1 motif 1 - [ST]Px[KR]x	Proline-dependent serine/threonine kinase group	0.2376	0.000943386	VINEX_HUMAN (swissprot)	S339	LGSARSLsPHKMADG	1.42816
CDK1 motif 1 - [ST]Px[KR]x	Proline-dependent serine/threonine kinase group	0.2494	0.00117764	VINEX_HUMAN (swissprot)	S373	SASNGGGsPARREEK	0.920215
CDK1 motif 1 - [ST]Px[KR]x	Proline-dependent serine/threonine kinase group	0.3401	0.00398221	VINEX_HUMAN (swissprot)	S563	IDLGGQTsPRRTGFS	4.55315
CDK1 motif 1 - [ST]Px[KR]x	Proline-dependent serine/threonine kinase group	0.4453	0.00964417	VINEX_HUMAN (swissprot)	S606	PLDLGTSsPNTSQIH	2.21351
CDK1 motif 1 - [ST]Px[KR]x	Proline-dependent serine/threonine kinase group	0.4355	0.00883484	SRBS1_HUMAN (swissprot)	T82	ASSSYREtPSSSPAS	3.11531
CDK1 motif 1 - [ST]Px[KR]x	Proline-dependent serine/threonine kinase group	0.3991	0.00644469	SRBS1_HUMAN (swissprot)	S86	YRETPSSsPASPQET	1.15458
CDK1 motif 1 - [ST]Px[KR]x	Proline-dependent serine/threonine kinase group	0.3541	0.00446437	SRBS1_HUMAN (swissprot)	S350	PTQEKPTsPGKAIEK	2.0973
CDK1 motif 1 - [ST]Px[KR]x	Proline-dependent serine/threonine kinase group	0.4003	0.00650393	SRBS1_HUMAN (swissprot)	T447	TYQFPAStPSPKSED	1.43468
CDK1 motif 1 - [ST]Px[KR]x	Proline-dependent serine/threonine kinase group	0.3184	0.00321989	SRBS1_HUMAN (swissprot)	S945	MDLPFSSsPSRSATA	2.23847
CDK1 motif 1 - [ST]Px[KR]x	Proline-dependent serine/threonine kinase group	0.3482	0.00425265	SRBS1_HUMAN (swissprot)	S1057	ASPLALPsPHKTYSL	1.64787
CDK1 motif 1 - [ST]Px[KR]x	Proline-dependent serine/threonine kinase group	0.4491	0.00998667	SRBS1_HUMAN (swissprot)	T1082	NGDGGVHtPSSGIHQ	0.927567
CDK1 motif 1 - [ST]Px[KR]x	Proline-dependent serine/threonine kinase group	0.3827	0.00565454	SRBS1_HUMAN (swissprot)	T1223	QAQQRRVtPDRSQTS	2.43168
CDK1 motif 1 - [ST]Px[KR]x	Proline-dependent serine/threonine kinase group	0.3847	0.00574806	ASAP1_HUMAN (swissprot)	S726	DDLDDKPsPIKKERS	2.0586
CDK1 motif 1 - [ST]Px[KR]x	Proline-dependent serine/threonine kinase group	0.3047	0.00275304	ASAP1_HUMAN (swissprot)	S782	FVSTSTDsPTSPTTE	2.21351
CDK1 motif 1 - [ST]Px[KR]x	Proline-dependent serine/threonine kinase group	0.3754	0.00532169	PAK1_HUMAN (swissprot)	T212	VIEPLPVtPTRDVAT	1.65904
CDK1 motif 1 - [ST]Px[KR]x	Proline-dependent serine/threonine kinase group	0.2241	0.000702238	SRC_HUMAN (swissprot)	T37	GAFPASQtPSKPASA	3.1809
CDK1 motif 1 - [ST]Px[KR]x	Proline-dependent serine/threonine kinase group	0.3196	0.0032611	SRC_HUMAN (swissprot)	S75	NSSDTVTsPQRAGPL	1.7254
CDK1 motif 1 - [ST]Px[KR]x	Proline-dependent serine/threonine kinase group	0.3148	0.00309623	BCAR1_HUMAN (swissprot)	T119	DSVYLVPtPSKAQQG	1.57297
Cdc2 Kinase	Proline-dependent serine/threonine kinase group	0.2361	3.03704e-05	ITA3_HUMAN (swissprot)	S869	DPGDRPSsPQRRRRQ	3.33783
Cdc2 Kinase	Proline-dependent serine/threonine kinase group	0.5075	0.00809304	ITA5_HUMAN (swissprot)	S8	MGSRTPEsPLHAVQL	1.42703
Cdc2 Kinase	Proline-dependent serine/threonine kinase group	0.4468	0.00303084	ITA7_HUMAN (swissprot)	T643	TLSYSLQtPRLRRQA	1.17976
Cdc2 Kinase	Proline-dependent serine/threonine kinase group	0.4463	0.00300304	ITA7_HUMAN (swissprot)	S1150	ILRNNWGsPRREGPD	1.8956
Cdc2 Kinase	Proline-dependent serine/threonine kinase group	0.4709	0.00462525	ITA9_HUMAN (swissprot)	T597	ERELPPLtPVLRWKK	0.399168
Cdc2 Kinase	Proline-dependent serine/threonine kinase group	0.3777	0.000869376	ITB1_HUMAN (swissprot)	S474	QSEGIPEsPKCHEGN	1.36324
Cdc2 Kinase	Proline-dependent serine/threonine kinase group	0.4606	0.00380914	ITB4_HUMAN (swissprot)	T1530	LTAGVPDtPTRLVFS	3.73284
Cdc2 Kinase	Proline-dependent serine/threonine kinase group	0.5125	0.00868474	ITB7_HUMAN (swissprot)	T643	DQCPGCKtPCERHRD	0.508944
Cdc2 Kinase	Proline-dependent serine/threonine kinase group	0.5133	0.00877941	FLNA_HUMAN (swissprot)	S757	GGVSIPNsPFRVNVG	2.07973
Cdc2 Kinase	Proline-dependent serine/threonine kinase group	0.4684	0.00442716	FLNA_HUMAN (swissprot)	S860	ADQATPTsPIRVKVE	1.45495
Cdc2 Kinase	Proline-dependent serine/threonine kinase group	0.4624	0.00395176	FLNA_HUMAN (swissprot)	S1084	LQGGSAGsPARFTID	0.939386
Cdc2 Kinase	Proline-dependent serine/threonine kinase group	0.4581	0.00365913	FLNA_HUMAN (swissprot)	S1148	ADTHIPGsPFKAHVV	1.25838
Cdc2 Kinase	Proline-dependent serine/threonine kinase group	0.4896	0.00625057	FLNA_HUMAN (swissprot)	S1436	GGHQVPGsPFKVPVH	1.25838
Cdc2 Kinase	Proline-dependent serine/threonine kinase group	0.4896	0.00625057	FLNA_HUMAN (swissprot)	S1533	GDEEVPRsPFKVKVL	2.49054
Cdc2 Kinase	Proline-dependent serine/threonine kinase group	0.4854	0.00584723	FLNA_HUMAN (swissprot)	S1630	GGDEIPFsPYRVRAV	1.95135
Cdc2 Kinase	Proline-dependent serine/threonine kinase group	0.4887	0.00616414	FLNA_HUMAN (swissprot)	S1946	NEQHVPGsPFTARVT	0.908107
Cdc2 Kinase	Proline-dependent serine/threonine kinase group	0.5057	0.00788003	FLNA_HUMAN (swissprot)	S2128	ADQHVPGsPFSVKVT	0.843242
Cdc2 Kinase	Proline-dependent serine/threonine kinase group	0.3843	0.000993825	FLNA_HUMAN (swissprot)	S2414	NGTHIPGsPFKIRVG	1.25838
Cdc2 Kinase	Proline-dependent serine/threonine kinase group	0.4692	0.00449055	FLNA_HUMAN (swissprot)	S2510	GPYHIGGsPFKAKVT	0.805361
Cdc2 Kinase	Proline-dependent serine/threonine kinase group	0.4092	0.00157385	FLNA_HUMAN (swissprot)	S2640	GDEHIPGsPYRVVVP	2.23011
Cdc2 Kinase	Proline-dependent serine/threonine kinase group	0.4665	0.00427662	TENS1_HUMAN (swissprot)	S915	PEATSPRsPGVRSPV	1.05637
Cdc2 Kinase	Proline-dependent serine/threonine kinase group	0.3893	0.0010881	TENS1_HUMAN (swissprot)	S1177	GVHTVPGsPQARHRT	1.27135
Cdc2 Kinase	Proline-dependent serine/threonine kinase group	0.5216	0.00976164	TENS1_HUMAN (swissprot)	S1243	SAATTPGsPSLCRHP	0.803088
Cdc2 Kinase	Proline-dependent serine/threonine kinase group	0.515	0.00898059	TENS1_HUMAN (swissprot)	S1269	KVATTPGsPSLGRHP	0.803088
Cdc2 Kinase	Proline-dependent serine/threonine kinase group	0.4799	0.00533836	TENS1_HUMAN (swissprot)	T1328	VAYGGYStPEDRRPT	3.10573
Cdc2 Kinase	Proline-dependent serine/threonine kinase group	0.4633	0.00402307	FAK1_HUMAN (swissprot)	S732	SSEGFYPsPQHMVQT	2.71135
Cdc2 Kinase	Proline-dependent serine/threonine kinase group	0.5182	0.00935928	PAXI_HUMAN (swissprot)	S106	NPQDSVGsPCSRVGE	0.250563
Cdc2 Kinase	Proline-dependent serine/threonine kinase group	0.4613	0.0038646	PAXI_HUMAN (swissprot)	S244	VNQGEMSsPQRVTST	2.13621
Cdc2 Kinase	Proline-dependent serine/threonine kinase group	0.4097	0.00158796	PARVA_HUMAN (swissprot)	S14	KSPSVPKsPTPKSPP	3.27702
Cdc2 Kinase	Proline-dependent serine/threonine kinase group	0.2919	0.000134993	PARVA_HUMAN (swissprot)	S19	PKSPTPKsPPSRKKD	3.04295
Cdc2 Kinase	Proline-dependent serine/threonine kinase group	0.4851	0.00581842	PALLD_HUMAN (swissprot)	S115	KQTKSISsPVSKRKP	0.443706
Cdc2 Kinase	Proline-dependent serine/threonine kinase group	0.3435	0.000445268	PALLD_HUMAN (swissprot)	T156	STNVKPKtPHQRKGG	3.72673
Cdc2 Kinase	Proline-dependent serine/threonine kinase group	0.481	0.00542552	PALLD_HUMAN (swissprot)	S766	SSLPSPMsPTPRQFG	1.62162
Cdc2 Kinase	Proline-dependent serine/threonine kinase group	0.4676	0.00436378	PALLD_HUMAN (swissprot)	S1104	QRGRSPRsPSGHPHV	1.90733
Cdc2 Kinase	Proline-dependent serine/threonine kinase group	0.4716	0.00468072	VINEX_HUMAN (swissprot)	T64	TVCNGGYtPRRDASQ	3.0421
Cdc2 Kinase	Proline-dependent serine/threonine kinase group	0.5114	0.00855457	VINEX_HUMAN (swissprot)	S303	RLPSPKSsPAPRRAP	1.98806
Cdc2 Kinase	Proline-dependent serine/threonine kinase group	0.3886	0.00107491	VINEX_HUMAN (swissprot)	S373	SASNGGGsPARREEK	0.920215
Cdc2 Kinase	Proline-dependent serine/threonine kinase group	0.4004	0.00132558	VINEX_HUMAN (swissprot)	S563	IDLGGQTsPRRTGFS	4.55315
Cdc2 Kinase	Proline-dependent serine/threonine kinase group	0.5232	0.00996285	VINEX_HUMAN (swissprot)	T615	NTSQIHWtPYRAMYQ	2.24555
Cdc2 Kinase	Proline-dependent serine/threonine kinase group	0.5191	0.00946579	SRBS1_HUMAN (swissprot)	S89	TPSSSPAsPQETRQH	2.22486
Cdc2 Kinase	Proline-dependent serine/threonine kinase group	0.4861	0.00591446	SRBS1_HUMAN (swissprot)	S350	PTQEKPTsPGKAIEK	2.0973
Cdc2 Kinase	Proline-dependent serine/threonine kinase group	0.4725	0.00475203	SRBS1_HUMAN (swissprot)	S713	ASTKDSEsPRHFIPA	2.93729
Cdc2 Kinase	Proline-dependent serine/threonine kinase group	0.4572	0.00360909	ASAP1_HUMAN (swissprot)	S726	DDLDDKPsPIKKERS	2.0586
Cdc2 Kinase	Proline-dependent serine/threonine kinase group	0.4912	0.00640423	ASAP1_HUMAN (swissprot)	T758	LALPGFStPRDKQRL	1.94108
Cdc2 Kinase	Proline-dependent serine/threonine kinase group	0.5032	0.00758418	ASAP1_HUMAN (swissprot)	S843	RTLSDPPsPLPHGPP	1.44788
Cdc2 Kinase	Proline-dependent serine/threonine kinase group	0.4685	0.00443509	FYN_HUMAN (swissprot)	T35	YRYGTDPtPQHYPSF	3.11201
Cdc2 Kinase	Proline-dependent serine/threonine kinase group	0.5155	0.00903976	SRC_HUMAN (swissprot)	S75	NSSDTVTsPQRAGPL	1.7254
Cdc2 Kinase	Proline-dependent serine/threonine kinase group	0.5135	0.00880308	BCAR1_HUMAN (swissprot)	T81	PGPGPPAtPAQPQPG	1.39767
Cdc2 Kinase	Proline-dependent serine/threonine kinase group	0.5071	0.00804571	BCAR1_HUMAN (swissprot)	T152	TSTFSKQtPHHPFPS	3.27952
Cdc2 Kinase	Proline-dependent serine/threonine kinase group	0.4851	0.00581842	BCAR1_HUMAN (swissprot)	S639	IQSRPLPsPPKFTSQ	1.87258
Cbl-Associated protein C-SH3	Src homology 3 group	0.5875	0.00181965	ITB4_HUMAN (swissprot)	P1478	THLSPHVpHRVLSTS	0.70793
Cbl-Associated protein C-SH3	Src homology 3 group	0.7057	0.00834914	TLN1_HUMAN (swissprot)	P1329	LSTDPAApNLKSQLA	0.996054
Cbl-Associated protein C-SH3	Src homology 3 group	0.7148	0.00937192	TLN1_HUMAN (swissprot)	P1627	LAVNPRDpPSWSVLA	2.52538
Cbl-Associated protein C-SH3	Src homology 3 group	0.6341	0.00324374	TLN1_HUMAN (swissprot)	P2166	VFCSPEPpAKTSTPE	2.76682
Cbl-Associated protein C-SH3	Src homology 3 group	0.6854	0.00631595	FLNA_HUMAN (swissprot)	P740	CSYVPRKpVKHTAMV	2.80342
Cbl-Associated protein C-SH3	Src homology 3 group	0.684	0.00620996	FLNA_HUMAN (swissprot)	P1631	GDEIPFSpYRVRAVP	0.936648
Cbl-Associated protein C-SH3	Src homology 3 group	0.5752	0.00152043	TENS1_HUMAN (swissprot)	P633	EPQLPPApVRGGSSR	0.79634
Cbl-Associated protein C-SH3	Src homology 3 group	0.6534	0.00416713	TENS1_HUMAN (swissprot)	P663	QQQQPRPpPRQQERA	5.62889
Cbl-Associated protein C-SH3	Src homology 3 group	0.6991	0.00760734	TENS1_HUMAN (swissprot)	P892	QPAEPPApLRRRAAS	1.75121
Cbl-Associated protein C-SH3	Src homology 3 group	0.6958	0.00723644	SDOS_HUMAN (swissprot)	P45	GQLFGRIpMRFSVLM	0.816565
Cbl-Associated protein C-SH3	Src homology 3 group	0.7057	0.00834914	FAK1_HUMAN (swissprot)	P648	LPMPPNCpPTLYSLM	0.583783
Cbl-Associated protein C-SH3	Src homology 3 group	0.72	0.00995637	FAK1_HUMAN (swissprot)	P721	KPSRPGYpSPRSSEG	2.23011
Cbl-Associated protein C-SH3	Src homology 3 group	0.6391	0.00347886	FAK1_HUMAN (swissprot)	P876	PAAPPKKpPRPGAPG	6.63687
Cbl-Associated protein C-SH3	Src homology 3 group	0.6998	0.00768601	FAK1_HUMAN (swissprot)	P882	KPPRPGApGHLGSLA	0.39342
Cbl-Associated protein C-SH3	Src homology 3 group	0.7025	0.00798948	PAXI_HUMAN (swissprot)	P50	IAVPPPVpPPPSSEA	1.50356
Cbl-Associated protein C-SH3	Src homology 3 group	0.6966	0.00732635	PAXI_HUMAN (swissprot)	P51	AVPPPVPpPPSSEAL	1.30309
Cbl-Associated protein C-SH3	Src homology 3 group	0.6966	0.00732635	PAXI_HUMAN (swissprot)	P327	SSSPPGGpPKPGSQL	1.6594
Cbl-Associated protein C-SH3	Src homology 3 group	0.6136	0.00254723	ZYX_HUMAN (swissprot)	P199	GGTAPLPpWKSPSSS	1.27336
Cbl-Associated protein C-SH3	Src homology 3 group	0.6456	0.00379171	PALLD_HUMAN (swissprot)	P709	ACTPPASpEPMSALA	1.27135
Cbl-Associated protein C-SH3	Src homology 3 group	0.6163	0.00263897	SRBS1_HUMAN (swissprot)	P501	RSATLPLpARSSSLK	1.1982
Cbl-Associated protein C-SH3	Src homology 3 group	0.7025	0.00798948	SRBS1_HUMAN (swissprot)	P1009	ALTPPLPpLPEASIY	0.99792
Cbl-Associated protein C-SH3	Src homology 3 group	0.6097	0.00241472	ASAP1_HUMAN (swissprot)	P794	TTEAPPLpPRNAGKG	2.28541
Cbl-Associated protein C-SH3	Src homology 3 group	0.662	0.00458105	ASAP1_HUMAN (swissprot)	P832	KRPPPPPpGHKRTLS	2.28167
Cbl-Associated protein C-SH3	Src homology 3 group	0.4002	0.000121979	PAK1_HUMAN (swissprot)	P16	QDKPPAPpMRNTSTM	1.79177
Cbl-Associated protein C-SH3	Src homology 3 group	0.6789	0.00582384	PAK1_HUMAN (swissprot)	P213	IEPLPVTpTRDVATS	1.79177
Cbl-Associated protein C-SH3	Src homology 3 group	0.6782	0.00577084	SRC_HUMAN (swissprot)	P488	GYRMPCPpECPESLH	0.421621
Cbl-Associated protein C-SH3	Src homology 3 group	0.564	0.00131332	BCAR1_HUMAN (swissprot)	P730	TPAQPLApGRTGGLG	0.825834
Casein Kinase 2	Acidophilic serine/threonine kinase group	0.4627	0.00683907	ITA1_HUMAN (swissprot)	S924	TIYLSATsDSEEPPE	1.73539
Casein Kinase 2	Acidophilic serine/threonine kinase group	0.4268	0.00393954	ITA6_HUMAN (swissprot)	S107	DNDADPTsESKEDQW	3.1809
Casein Kinase 2	Acidophilic serine/threonine kinase group	0.4716	0.00795648	ITA6_HUMAN (swissprot)	T243	PYEVGGEtEHDESLV	2.23069
Casein Kinase 2	Acidophilic serine/threonine kinase group	0.4594	0.00653186	ITAV_HUMAN (swissprot)	T798	EHKENPEtEEDVGPV	4.43603
Casein Kinase 2	Acidophilic serine/threonine kinase group	0.4378	0.00466516	TLN1_HUMAN (swissprot)	S417	GLEGDEEsTMLEDSV	1.08489
Casein Kinase 2	Acidophilic serine/threonine kinase group	0.414	0.00323026	FLNA_HUMAN (swissprot)	T2094	PSKVDINtEDLEDGT	0.923419
Casein Kinase 2	Acidophilic serine/threonine kinase group	0.4749	0.00839275	PARVA_HUMAN (swissprot)	T73	FELDPEDtMLEENEV	1.35193
Casein Kinase 2	Acidophilic serine/threonine kinase group	0.4495	0.00561023	VINC_HUMAN (swissprot)	S1084	TNISDEEsEQATEML	2.79087
Casein Kinase 2	Acidophilic serine/threonine kinase group	0.3659	0.00151501	PALLD_HUMAN (swissprot)	T55	RAIADSEtEDFDSEK	1.92228
Casein Kinase 2	Acidophilic serine/threonine kinase group	0.4493	0.00559161	PALLD_HUMAN (swissprot)	S60	SETEDFDsEKEISQI	2.66373
Casein Kinase 2	Acidophilic serine/threonine kinase group	0.4615	0.00672736	SRBS1_HUMAN (swissprot)	S452	ASTPSPKsEDDDSDL	4.58678
Casein Kinase 2	Acidophilic serine/threonine kinase group	0.4289	0.00407807	SRBS1_HUMAN (swissprot)	S457	PKSEDDDsDLYSPRY	1.84822
Casein Kinase 2	Acidophilic serine/threonine kinase group	0.3067	0.000577527	ASAP1_HUMAN (swissprot)	S717	RQEEIDEsDDDLDDK	4.13662
Casein Kinase 2	Acidophilic serine/threonine kinase group	0.4426	0.0049818	PAK1_HUMAN (swissprot)	S174	TPAVPPVsEDEDDDD	1.76536
Casein Kinase 2	Acidophilic serine/threonine kinase group	0.3906	0.00223773	CAN2_HUMAN (swissprot)	S526	NLEEFDIsEDDIDDG	1.73636
Casein Kinase 1	Acidophilic serine/threonine kinase group	0.3902	0.00517429	ITA6_HUMAN (swissprot)	S867	KSEDEVGsLIEYEFR	0.225833
Casein Kinase 1	Acidophilic serine/threonine kinase group	0.3947	0.00573774	ITB4_HUMAN (swissprot)	T681	RDEDDDCtYSYTMEG	0.974114
Casein Kinase 1	Acidophilic serine/threonine kinase group	0.4169	0.00983629	ITB6_HUMAN (swissprot)	T305	KNEYSMStVLEYPTI	0.464951
Casein Kinase 1	Acidophilic serine/threonine kinase group	0.3572	0.00209745	SHPS1_HUMAN (swissprot)	T301	SRTETAStVTENKDG	0.830615
Casein Kinase 1	Acidophilic serine/threonine kinase group	0.3957	0.00586296	TLN1_HUMAN (swissprot)	S1055	LEMDSALsVVQNLEK	0.244099
Casein Kinase 1	Acidophilic serine/threonine kinase group	0.4125	0.00892844	TENS1_HUMAN (swissprot)	S515	QDGHSAGsMGTLSSL	0.433954
Casein Kinase 1	Acidophilic serine/threonine kinase group	0.374	0.00314585	TENS1_HUMAN (swissprot)	S1092	ADSTSVGsFPSGESS	0.404756
Casein Kinase 1	Acidophilic serine/threonine kinase group	0.3098	0.000490723	PTPRA_HUMAN (swissprot)	T130	GNSSTAAtTPETFPP	1.30449
Casein Kinase 1	Acidophilic serine/threonine kinase group	0.4126	0.00894907	FAK1_HUMAN (swissprot)	S54	SEPTTWAsIIRHGDA	0.31396
Casein Kinase 1	Acidophilic serine/threonine kinase group	0.3419	0.00131054	FAK1_HUMAN (swissprot)	T408	IDEEDTYtMPSTRDY	1.53369
Casein Kinase 1	Acidophilic serine/threonine kinase group	0.4054	0.00746351	CAV1_HUMAN (swissprot)	T93	KASFTTFtVTKYWFY	0.885381
Casein Kinase 1	Acidophilic serine/threonine kinase group	0.4109	0.00859831	VASP_HUMAN (swissprot)	S258	PKAESGRsGGGGLME	0.576919
Casein Kinase 1	Acidophilic serine/threonine kinase group	0.3919	0.00538715	VINC_HUMAN (swissprot)	T603	SDVFSDTtTPIKLLA	1.2469
Casein Kinase 1	Acidophilic serine/threonine kinase group	0.4045	0.00727781	PALLD_HUMAN (swissprot)	S9	SGTSSHEsFYDSLSD	1.63982
Casein Kinase 1	Acidophilic serine/threonine kinase group	0.4018	0.00672072	PALLD_HUMAN (swissprot)	S394	QKKTTSVsLTIGSSS	0.254847
Casein Kinase 1	Acidophilic serine/threonine kinase group	0.4169	0.00983629	SRBS1_HUMAN (swissprot)	S461	DDDSDLYsPRYSFSE	1.88321
Casein Kinase 1	Acidophilic serine/threonine kinase group	0.4017	0.00670009	PAK1_HUMAN (swissprot)	S149	YMSFTDKsAEDYNSS	2.9967
Casein Kinase 1	Acidophilic serine/threonine kinase group	0.3849	0.00451066	PAK1_HUMAN (swissprot)	T185	DDDDDDAtPPPVIAP	2.06289
Casein Kinase 1	Acidophilic serine/threonine kinase group	0.3973	0.0060633	PAK1_HUMAN (swissprot)	S204	TKSVYTRsVIEPLPV	0.782183
Casein Kinase 1	Acidophilic serine/threonine kinase group	0.3457	0.00142964	SRC_HUMAN (swissprot)	S348	TEYMSKGsLLDFLKG	0.69031
Casein Kinase 1	Acidophilic serine/threonine kinase group	0.3529	0.00183021	CAN2_HUMAN (swissprot)	S403	EDEEDGEsGCTFLVG	0.402957
Calmodulin dependent Kinase 2	Basophilic serine/threonine kinase	0.444	0.00305556	ITA1_HUMAN (swissprot)	S733	LDSLRQIsRSFFSGT	0.847365
Calmodulin dependent Kinase 2	Basophilic serine/threonine kinase	0.4212	0.00185485	ITA4_HUMAN (swissprot)	T977	QRPKRYFtIVIISSS	0.163657
Calmodulin dependent Kinase 2	Basophilic serine/threonine kinase	0.4196	0.00177924	ITA6_HUMAN (swissprot)	S147	HVNTKQEsRDIFGRC	2.11189
Calmodulin dependent Kinase 2	Basophilic serine/threonine kinase	0.4767	0.00606585	ITA8_HUMAN (swissprot)	S577	LVIKRQKsHQCQDFI	1.34361
Calmodulin dependent Kinase 2	Basophilic serine/threonine kinase	0.476	0.00596888	ITA8_HUMAN (swissprot)	S712	NKGFRPLsCEYKMEN	0.569657
Calmodulin dependent Kinase 2	Basophilic serine/threonine kinase	0.3993	0.00114949	ITB4_HUMAN (swissprot)	S1325	TQPKRPMsIPIIPDI	0.357065
Calmodulin dependent Kinase 2	Basophilic serine/threonine kinase	0.4351	0.00258686	TLN1_HUMAN (swissprot)	S1225	DASKRLLsDSLPPST	0.385482
Calmodulin dependent Kinase 2	Basophilic serine/threonine kinase	0.4401	0.00285018	FLNA_HUMAN (swissprot)	T2336	SGDARRLtVSSLQES	0.712071
Calmodulin dependent Kinase 2	Basophilic serine/threonine kinase	0.3872	0.000856351	TENS1_HUMAN (swissprot)	S621	SGMFRSQsFSEAEPQ	1.43239
Calmodulin dependent Kinase 2	Basophilic serine/threonine kinase	0.4743	0.00573338	TENS1_HUMAN (swissprot)	S1341	PTLSRQSsASGYQAP	0.954925
Calmodulin dependent Kinase 2	Basophilic serine/threonine kinase	0.4758	0.00594118	TENS1_HUMAN (swissprot)	S1381	SAAFRQGsPTPALPE	1.81621
Calmodulin dependent Kinase 2	Basophilic serine/threonine kinase	0.4931	0.00833775	TENS1_HUMAN (swissprot)	S1393	LPEKRRMsVGDRAGS	0.730163
Calmodulin dependent Kinase 2	Basophilic serine/threonine kinase	0.4359	0.00262899	SDOS_HUMAN (swissprot)	T118	HLYARQLtLEQLHAV	1.16834
Calmodulin dependent Kinase 2	Basophilic serine/threonine kinase	0.4441	0.00306083	FAK1_HUMAN (swissprot)	S677	TELKAQLsTILEEEK	0.365934
Calmodulin dependent Kinase 2	Basophilic serine/threonine kinase	0.3918	0.000941305	FAK1_HUMAN (swissprot)	T700	MESRRQAtVSWDSGG	0.605163
Calmodulin dependent Kinase 2	Basophilic serine/threonine kinase	0.4823	0.00684162	VASP_HUMAN (swissprot)	S322	TTLPRMKsSSSVTTS	1.46278
Calmodulin dependent Kinase 2	Basophilic serine/threonine kinase	0.4286	0.00224456	VINC_HUMAN (swissprot)	T233	ALKNRNFtVEKMSAE	1.22942
Calmodulin dependent Kinase 2	Basophilic serine/threonine kinase	0.4654	0.00485922	PALLD_HUMAN (swissprot)	S392	QAQKKTTsVSLTIGS	0.524684
Calmodulin dependent Kinase 2	Basophilic serine/threonine kinase	0.4644	0.00477122	PALLD_HUMAN (swissprot)	S479	VQWFRQGsEIQDSPD	1.10658
Calmodulin dependent Kinase 2	Basophilic serine/threonine kinase	0.4133	0.0015838	PALLD_HUMAN (swissprot)	S1333	YTQWHQQsQSTKPKK	3.08514
Calmodulin dependent Kinase 2	Basophilic serine/threonine kinase	0.4654	0.00485922	SRBS1_HUMAN (swissprot)	S326	EQQKRLSsLSDPVSE	0.626409
Calmodulin dependent Kinase 2	Basophilic serine/threonine kinase	0.4392	0.00280278	SRBS1_HUMAN (swissprot)	S1230	TPDRSQTsQDLFSYQ	1.83074
Calmodulin dependent Kinase 2	Basophilic serine/threonine kinase	0.489	0.00776978	ASAP1_HUMAN (swissprot)	S10	SSASRLSsFSSRDSL	0.527807
Calmodulin dependent Kinase 2	Basophilic serine/threonine kinase	0.4981	0.0090304	ASAP1_HUMAN (swissprot)	S493	VHISRIQsLELDKLG	0.43912
Calmodulin dependent Kinase 2	Basophilic serine/threonine kinase	0.4523	0.00370645	PAK1_HUMAN (swissprot)	S144	SNSQKYMsFTDKSAE	0.993833
Calmodulin dependent Kinase 2	Basophilic serine/threonine kinase	0.4907	0.00800528	AKT1_HUMAN (swissprot)	S473	RPHFPQFsYSASGTA	0.976962
Calmodulin dependent Kinase 2	Basophilic serine/threonine kinase	0.4532	0.00378565	KPCA_HUMAN (swissprot)	T48	ARFFKQPtFCSHCTD	0.550918
Calmodulin dependent Kinase 2	Basophilic serine/threonine kinase	0.4506	0.00355686	KPCA_HUMAN (swissprot)	T212	KNESKQKtKTIRSTL	2.31745
Calmodulin dependent Kinase 2	Basophilic serine/threonine kinase	0.4099	0.00147833	KPCA_HUMAN (swissprot)	S241	SDKDRRLsVEIWDWD	0.446962
Aurora B	Basophilic serine/threonine kinase	0.5368	0.00703962	ITA1_HUMAN (swissprot)	S306	DENIQRFsIAILGSY	0.258555
Aurora B	Basophilic serine/threonine kinase	0.4074	0.00105872	ITA2_HUMAN (swissprot)	T824	SNQNKRLtFSVTLKN	0.460108
Aurora B	Basophilic serine/threonine kinase	0.5483	0.00795232	ITA2_HUMAN (swissprot)	S835	TLKNKREsAYNTGIV	2.75374
Aurora B	Basophilic serine/threonine kinase	0.5708	0.00982321	ITA4_HUMAN (swissprot)	T777	LKYEVKLtVHGFVNP	0.545168
Aurora B	Basophilic serine/threonine kinase	0.4682	0.00275057	ITA4_HUMAN (swissprot)	S1021	QEENRRDsWSYINSK	2.21785
Aurora B	Basophilic serine/threonine kinase	0.4946	0.00409006	ITA6_HUMAN (swissprot)	S570	AEKERRKsGLSSRVQ	1.31564
Aurora B	Basophilic serine/threonine kinase	0.5576	0.0087184	ITA6_HUMAN (swissprot)	S786	GNPFKRNsNVTFYLV	1.79688
Aurora B	Basophilic serine/threonine kinase	0.4467	0.00196383	ITA7_HUMAN (swissprot)	T361	MLSGERLtSGFGYSL	0.613477
Aurora B	Basophilic serine/threonine kinase	0.5552	0.00851896	ITA9_HUMAN (swissprot)	T98	TNPDRRCtELDMARG	0.828194
Aurora B	Basophilic serine/threonine kinase	0.5095	0.00502386	ITA9_HUMAN (swissprot)	T245	VIMNRRYtYLGYAVT	1.29796
Aurora B	Basophilic serine/threonine kinase	0.3781	0.000677248	ITA9_HUMAN (swissprot)	S834	ISFPNRLsSGGAEMF	0.651037
Aurora B	Basophilic serine/threonine kinase	0.5368	0.00703962	ITAV_HUMAN (swissprot)	S697	NEALARLsCAFKTEN	0.23261
Aurora B	Basophilic serine/threonine kinase	0.4682	0.00275057	ITB1_HUMAN (swissprot)	T177	MNEMRRItSDFRIGF	0.879956
Aurora B	Basophilic serine/threonine kinase	0.5631	0.00917632	ITB1_HUMAN (swissprot)	S390	ILENGKLsEGVTISY	0.644289
Aurora B	Basophilic serine/threonine kinase	0.5653	0.00936115	ITB4_HUMAN (swissprot)	S76	AAGCQREsIVVMESS	0.402266
Aurora B	Basophilic serine/threonine kinase	0.5264	0.00624431	ITB4_HUMAN (swissprot)	S558	CNDRGRCsMGQCVCE	0.546871
Aurora B	Basophilic serine/threonine kinase	0.5553	0.00852727	ITB4_HUMAN (swissprot)	S1401	PELIPRLsASSGRSS	0.899979
Aurora B	Basophilic serine/threonine kinase	0.4233	0.00135083	ITB4_HUMAN (swissprot)	T1524	SSHDSRLtAGVPDTP	0.3964
Aurora B	Basophilic serine/threonine kinase	0.5685	0.00962999	ITB4_HUMAN (swissprot)	T1702	DSPESRLtVPGLSEN	0.606735
Aurora B	Basophilic serine/threonine kinase	0.5289	0.00643452	ITB4_HUMAN (swissprot)	T1721	FKVQARTtEGFGPER	1.3874
Aurora B	Basophilic serine/threonine kinase	0.4787	0.00323711	ITB5_HUMAN (swissprot)	T172	AEEMRKLtSNFRLGF	1.05704
Aurora B	Basophilic serine/threonine kinase	0.5195	0.00573075	ITB5_HUMAN (swissprot)	T438	RSCPSRHtEHVFALR	1.54171
Aurora B	Basophilic serine/threonine kinase	0.3464	0.000387916	FLNA_HUMAN (swissprot)	T2336	SGDARRLtVSSLQES	0.712071
Aurora B	Basophilic serine/threonine kinase	0.521	0.0058424	ACTN1_HUMAN (swissprot)	T293	LLEWIRRtIPWLENR	1.446
Aurora B	Basophilic serine/threonine kinase	0.5543	0.00844418	TENS1_HUMAN (swissprot)	S374	AKVKKKDsLHGSTGA	1.13901
Aurora B	Basophilic serine/threonine kinase	0.4864	0.00363728	TENS1_HUMAN (swissprot)	T1335	TPEDRRPtLSRQSSA	2.16817
Aurora B	Basophilic serine/threonine kinase	0.3024	0.000140177	TENS1_HUMAN (swissprot)	S1393	LPEKRRMsVGDRAGS	0.730163
Aurora B	Basophilic serine/threonine kinase	0.4716	0.00290677	PTPRA_HUMAN (swissprot)	S193	HSNSFRLsNGRTEDV	1.60568
Aurora B	Basophilic serine/threonine kinase	0.5131	0.00526852	FAK1_HUMAN (swissprot)	S88	ACYGFRLsHLRSEEV	1.09028
Aurora B	Basophilic serine/threonine kinase	0.4753	0.00307892	FAK1_HUMAN (swissprot)	T600	SINFRRFtSASDVWM	1.01767
Aurora B	Basophilic serine/threonine kinase	0.569	0.00967199	FAK1_HUMAN (swissprot)	S726	GYPSPRSsEGFYPSP	1.19628
Aurora B	Basophilic serine/threonine kinase	0.4924	0.00395988	FAK1_HUMAN (swissprot)	S840	LKPDVRLsRGSIDRE	1.28851
Aurora B	Basophilic serine/threonine kinase	0.4274	0.00145128	SRBS1_HUMAN (swissprot)	S325	REQQKRLsSLSDPVS	0.734677
Aurora B	Basophilic serine/threonine kinase	0.4457	0.00192905	SRBS1_HUMAN (swissprot)	S665	FHAVKREsDGAPGDL	1.73921
Aurora B	Basophilic serine/threonine kinase	0.5563	0.00861037	SRBS1_HUMAN (swissprot)	S703	LSGLKRPsSSASTKD	1.68746
Aurora B	Basophilic serine/threonine kinase	0.4358	0.00166185	SRBS1_HUMAN (swissprot)	T762	DIAARRHtGVIPTHH	0.453838
Aurora B	Basophilic serine/threonine kinase	0.5543	0.00844418	SRBS1_HUMAN (swissprot)	S791	DDTAKRKsGSEMRPA	2.76284
Aurora B	Basophilic serine/threonine kinase	0.5526	0.00830291	ASAP1_HUMAN (swissprot)	S9	RSSASRLsSFSSRDS	0.771411
Aurora B	Basophilic serine/threonine kinase	0.4515	0.00213076	ASAP1_HUMAN (swissprot)	S766	PRDKQRLsYGAFTNQ	0.777071
Aurora B	Basophilic serine/threonine kinase	0.5346	0.00687111	PAK1_HUMAN (swissprot)	T423	PEQSKRStMVGTPYW	0.631005
Aurora B	Basophilic serine/threonine kinase	0.4748	0.00305566	PK3CA_HUMAN (swissprot)	S312	PSYSRRIsTATPYMN	0.887198
Aurora B	Basophilic serine/threonine kinase	0.5671	0.00951237	FYN_HUMAN (swissprot)	T254	HKGMPRLtDLSVKTK	0.985945
Aurora B	Basophilic serine/threonine kinase	0.5427	0.0075048	FYN_HUMAN (swissprot)	T444	AALYGRFtIKSDVWS	1.05377
Aurora B	Basophilic serine/threonine kinase	0.4659	0.00266275	SRC_HUMAN (swissprot)	S161	GKITRREsERLLLNA	2.91402
Aurora B	Basophilic serine/threonine kinase	0.5427	0.0075048	SRC_HUMAN (swissprot)	T443	AALYGRFtIKSDVWS	1.05377
Aurora B	Basophilic serine/threonine kinase	0.404	0.00100863	BCAR1_HUMAN (swissprot)	S428	PAEGKRLsASSTGST	0.899979
Aurora B	Basophilic serine/threonine kinase	0.5373	0.00707792	CAN2_HUMAN (swissprot)	T79	GIEWKRPtEICADPQ	0.651819
Aurora B	Basophilic serine/threonine kinase	0.4728	0.00296261	KPCA_HUMAN (swissprot)	S241	SDKDRRLsVEIWDWD	0.446962
Aurora A	Basophilic serine/threonine kinase	0.521	0.00670062	ITA1_HUMAN (swissprot)	T248	VQRGGRQtMTALGID	1.61864
Aurora A	Basophilic serine/threonine kinase	0.5167	0.00634926	ITA1_HUMAN (swissprot)	S760	KSECTKHsFYMLDKH	1.12214
Aurora A	Basophilic serine/threonine kinase	0.349	0.000571188	ITA2_HUMAN (swissprot)	T824	SNQNKRLtFSVTLKN	0.460108
Aurora A	Basophilic serine/threonine kinase	0.4997	0.00515865	ITA2_HUMAN (swissprot)	S835	TLKNKREsAYNTGIV	2.75374
Aurora A	Basophilic serine/threonine kinase	0.4159	0.0016754	ITA4_HUMAN (swissprot)	S1021	QEENRRDsWSYINSK	2.21785
Aurora A	Basophilic serine/threonine kinase	0.4143	0.00164074	ITA7_HUMAN (swissprot)	T361	MLSGERLtSGFGYSL	0.613477
Aurora A	Basophilic serine/threonine kinase	0.5373	0.00823103	ITA7_HUMAN (swissprot)	T588	RGQVPRVtFLSRNLE	0.460108
Aurora A	Basophilic serine/threonine kinase	0.3617	0.000712299	ITA9_HUMAN (swissprot)	T245	VIMNRRYtYLGYAVT	1.29796
Aurora A	Basophilic serine/threonine kinase	0.4449	0.00256498	ITA9_HUMAN (swissprot)	S834	ISFPNRLsSGGAEMF	0.651037
Aurora A	Basophilic serine/threonine kinase	0.5448	0.00902586	ITAV_HUMAN (swissprot)	S697	NEALARLsCAFKTEN	0.23261
Aurora A	Basophilic serine/threonine kinase	0.4909	0.00462448	ITB1_HUMAN (swissprot)	T177	MNEMRRItSDFRIGF	0.879956
Aurora A	Basophilic serine/threonine kinase	0.5368	0.00817891	ITB4_HUMAN (swissprot)	S469	EVRSARCsFNGDFVC	0.461422
Aurora A	Basophilic serine/threonine kinase	0.4107	0.00156275	ITB4_HUMAN (swissprot)	S558	CNDRGRCsMGQCVCE	0.546871
Aurora A	Basophilic serine/threonine kinase	0.5347	0.00796	ITB4_HUMAN (swissprot)	T1524	SSHDSRLtAGVPDTP	0.3964
Aurora A	Basophilic serine/threonine kinase	0.4738	0.00374937	UROK_HUMAN (swissprot)	T389	CSLQGRMtLTGIVSW	0.755048
Aurora A	Basophilic serine/threonine kinase	0.5513	0.00979748	FLNA_HUMAN (swissprot)	T1089	AGSPARFtIDTKGAG	0.947645
Aurora A	Basophilic serine/threonine kinase	0.4807	0.00407062	FLNA_HUMAN (swissprot)	T1617	PDVTGRYtILIKYGG	0.411307
Aurora A	Basophilic serine/threonine kinase	0.3716	0.000841775	FLNA_HUMAN (swissprot)	T2336	SGDARRLtVSSLQES	0.712071
Aurora A	Basophilic serine/threonine kinase	0.5465	0.00922767	TENS1_HUMAN (swissprot)	S374	AKVKKKDsLHGSTGA	1.13901
Aurora A	Basophilic serine/threonine kinase	0.3645	0.000744911	TENS1_HUMAN (swissprot)	T1335	TPEDRRPtLSRQSSA	2.16817
Aurora A	Basophilic serine/threonine kinase	0.2987	0.000219048	TENS1_HUMAN (swissprot)	S1393	LPEKRRMsVGDRAGS	0.730163
Aurora A	Basophilic serine/threonine kinase	0.4826	0.00417379	PTPRA_HUMAN (swissprot)	S193	HSNSFRLsNGRTEDV	1.60568
Aurora A	Basophilic serine/threonine kinase	0.4803	0.00405168	FAK1_HUMAN (swissprot)	S517	FLQVRKYsLDLASLI	1.09299
Aurora A	Basophilic serine/threonine kinase	0.4674	0.00345445	FAK1_HUMAN (swissprot)	T600	SINFRRFtSASDVWM	1.01767
Aurora A	Basophilic serine/threonine kinase	0.5319	0.00766813	FAK1_HUMAN (swissprot)	S726	GYPSPRSsEGFYPSP	1.19628
Aurora A	Basophilic serine/threonine kinase	0.5447	0.00901399	FAK1_HUMAN (swissprot)	S840	LKPDVRLsRGSIDRE	1.28851
Aurora A	Basophilic serine/threonine kinase	0.4564	0.00299251	PAXI_HUMAN (swissprot)	S533	HYHERRGsLCSGCQK	0.352645
Aurora A	Basophilic serine/threonine kinase	0.4787	0.00397726	CAV1_HUMAN (swissprot)	S149	QCISRVYsIYVHTVC	0.291164
Aurora A	Basophilic serine/threonine kinase	0.5154	0.00625297	ZYX_HUMAN (swissprot)	S169	DPFKARVsSGYVPPP	0.927727
Aurora A	Basophilic serine/threonine kinase	0.5331	0.00779322	VINEX_HUMAN (swissprot)	T208	SEELPRStFNYRPGA	1.96696
Aurora A	Basophilic serine/threonine kinase	0.4429	0.00249159	SRBS1_HUMAN (swissprot)	S325	REQQKRLsSLSDPVS	0.734677
Aurora A	Basophilic serine/threonine kinase	0.5001	0.0051839	SRBS1_HUMAN (swissprot)	S465	DLYSPRYsFSEDTKS	1.89411
Aurora A	Basophilic serine/threonine kinase	0.4787	0.00397726	SRBS1_HUMAN (swissprot)	S665	FHAVKREsDGAPGDL	1.73921
Aurora A	Basophilic serine/threonine kinase	0.4495	0.00273379	SRBS1_HUMAN (swissprot)	T762	DIAARRHtGVIPTHH	0.453838
Aurora A	Basophilic serine/threonine kinase	0.5507	0.00972625	SRBS1_HUMAN (swissprot)	S1000	VGVPGRRsLALTPPL	0.809449
Aurora A	Basophilic serine/threonine kinase	0.4929	0.00473308	ASAP1_HUMAN (swissprot)	S9	RSSASRLsSFSSRDS	0.771411
Aurora A	Basophilic serine/threonine kinase	0.5067	0.00560859	ASAP1_HUMAN (swissprot)	S16	SSFSSRDsLWNRMPD	1.45462
Aurora A	Basophilic serine/threonine kinase	0.4428	0.00248792	ASAP1_HUMAN (swissprot)	S766	PRDKQRLsYGAFTNQ	0.777071
Aurora A	Basophilic serine/threonine kinase	0.425	0.00193165	PAK1_HUMAN (swissprot)	T423	PEQSKRStMVGTPYW	0.631005
Aurora A	Basophilic serine/threonine kinase	0.489	0.00452131	PK3CA_HUMAN (swissprot)	S312	PSYSRRIsTATPYMN	0.887198
Aurora A	Basophilic serine/threonine kinase	0.3652	0.000753063	SRC_HUMAN (swissprot)	S17	DASQRRRsLEPAENV	2.6018
Aurora A	Basophilic serine/threonine kinase	0.5004	0.00520283	BCAR1_HUMAN (swissprot)	S428	PAEGKRLsASSTGST	0.899979
Aurora A	Basophilic serine/threonine kinase	0.4141	0.00163641	KPCA_HUMAN (swissprot)	S241	SDKDRRLsVEIWDWD	0.446962
ATM Kinase	DNA damage kinase group	0.5045	0.00804201	ITA1_HUMAN (swissprot)	S378	ASFEMEMsQTGFSAH	1.30186
ATM Kinase	DNA damage kinase group	0.5114	0.00901013	ITA1_HUMAN (swissprot)	T725	ADLQYRVtLDSLRQI	0.88735
ATM Kinase	DNA damage kinase group	0.4743	0.00457605	ITA2_HUMAN (swissprot)	S916	SFQALSEsQEENKAD	3.70217
ATM Kinase	DNA damage kinase group	0.4089	0.0012012	ITA3_HUMAN (swissprot)	S285	MGAVFLLsQEAGGDL	0.63285
ATM Kinase	DNA damage kinase group	0.4763	0.0047789	ITA5_HUMAN (swissprot)	T237	QGQILSAtQEQIAES	2.32572
ATM Kinase	DNA damage kinase group	0.4624	0.00369689	ITA5_HUMAN (swissprot)	T571	ASRQATLtQTLLIQN	0.811346
ATM Kinase	DNA damage kinase group	0.5095	0.00874355	ITA6_HUMAN (swissprot)	T588	QGSEPKYtQELTLKR	2.56339
ATM Kinase	DNA damage kinase group	0.4685	0.00412058	ITA7_HUMAN (swissprot)	S167	IGRCFVLsQDLAIRD	0.448345
ATM Kinase	DNA damage kinase group	0.4882	0.00598588	ITB4_HUMAN (swissprot)	T301	GTYTQYRtQDYPSVP	4.59966
ATM Kinase	DNA damage kinase group	0.5019	0.00767721	ITB4_HUMAN (swissprot)	S1022	RVLDGGKsQVSYRTQ	1.04697
ATM Kinase	DNA damage kinase group	0.5069	0.00837875	ITB4_HUMAN (swissprot)	T1733	PEREGIItIESQDGG	0.264387
ATM Kinase	DNA damage kinase group	0.4364	0.00219633	ITB4_HUMAN (swissprot)	T1797	GSLTRHVtQEFVSRT	0.867491
ATM Kinase	DNA damage kinase group	0.4462	0.00267442	ITB6_HUMAN (swissprot)	S80	NFIENPVsQVEILKN	0.784605
ATM Kinase	DNA damage kinase group	0.5115	0.00902416	ITB6_HUMAN (swissprot)	T331	VLLIFAVtQEQVHLY	1.28809
ATM Kinase	DNA damage kinase group	0.4879	0.00595545	TLN1_HUMAN (swissprot)	S52	SDFGLFLsDDDPKKG	1.02139
ATM Kinase	DNA damage kinase group	0.5048	0.0080841	TLN1_HUMAN (swissprot)	S1294	EMAGQAPsQEDRAQV	2.40285
ATM Kinase	DNA damage kinase group	0.4815	0.00530632	TLN1_HUMAN (swissprot)	T1792	NPKQAAHtQEALEEA	1.37754
ATM Kinase	DNA damage kinase group	0.4521	0.00298148	TLN1_HUMAN (swissprot)	T2076	LGAEDPEtQVVLINA	0.844959
ATM Kinase	DNA damage kinase group	0.4213	0.00159945	TLN1_HUMAN (swissprot)	S2420	AAVQGHAsQEKLISS	2.53219
ATM Kinase	DNA damage kinase group	0.5128	0.00920656	FLNA_HUMAN (swissprot)	S2083	GYGGLSLsIEGPSKV	0.407755
ATM Kinase	DNA damage kinase group	0.5115	0.00902416	ACTN1_HUMAN (swissprot)	T663	ISIEMHGtLEDQLSH	1.06223
ATM Kinase	DNA damage kinase group	0.4613	0.00362048	TENS1_HUMAN (swissprot)	S708	SQQEIEQsIETLNML	1.61377
ATM Kinase	DNA damage kinase group	0.4807	0.00522518	PARVA_HUMAN (swissprot)	T316	PLHSFFLtPDSFEQK	0.817296
ATM Kinase	DNA damage kinase group	0.5128	0.00920656	VINC_HUMAN (swissprot)	T153	TVAEVVEtMEDLVTY	1.21674
ATM Kinase	DNA damage kinase group	0.5122	0.00912238	ZYX_HUMAN (swissprot)	T363	VEELEQLtQQLMQDM	1.16834
ATM Kinase	DNA damage kinase group	0.3632	0.000430458	PALLD_HUMAN (swissprot)	S35	PGLSAFLsQEEINKS	1.13913
ATM Kinase	DNA damage kinase group	0.5	0.00741062	PALLD_HUMAN (swissprot)	S279	RFIQKLRsQEVAEGS	1.10426
ATM Kinase	DNA damage kinase group	0.4788	0.00503247	VINEX_HUMAN (swissprot)	S13	RSLRAGLsLDDFIPG	0.576444
ATM Kinase	DNA damage kinase group	0.516	0.00967978	VINEX_HUMAN (swissprot)	T573	RTGFSFPtQEPRPQT	2.05372
ATM Kinase	DNA damage kinase group	0.5037	0.00792976	SRBS1_HUMAN (swissprot)	S235	SGSFAPIsQTPPSFS	1.28649
ATM Kinase	DNA damage kinase group	0.4769	0.00483976	SRBS1_HUMAN (swissprot)	T344	GEQDSAPtQEKPTSP	3.09883
ATM Kinase	DNA damage kinase group	0.4501	0.00286468	SRBS1_HUMAN (swissprot)	S1230	TPDRSQTsQDLFSYQ	1.83074
ATM Kinase	DNA damage kinase group	0.4658	0.00393304	ASAP1_HUMAN (swissprot)	S717	RQEEIDEsDDDLDDK	4.13662
ATM Kinase	DNA damage kinase group	0.5031	0.00784558	ASAP1_HUMAN (swissprot)	S877	TNKFEGLsQQSSTSS	1.00739
ATM Kinase	DNA damage kinase group	0.4814	0.00529618	PK3CA_HUMAN (swissprot)	T74	SYIFVSVtQEAEREE	0.996738
ATM Kinase	DNA damage kinase group	0.4155	0.00141318	PK3CA_HUMAN (swissprot)	T624	RCLEKYLtDDKLSQY	2.38356
ATM Kinase	DNA damage kinase group	0.3861	0.000705757	PK3CA_HUMAN (swissprot)	T957	ERVPFVLtQDFLIVI	0.506975
Amphiphysin SH3	Src homology 3 group	0.5411	0.00582662	ITA3_HUMAN (swissprot)	P577	ISMNYSLpLRMPDRP	0.625997
Amphiphysin SH3	Src homology 3 group	0.5553	0.00746458	ITA3_HUMAN (swissprot)	P845	VHGNGSWpCRPPGDL	0.810617
Amphiphysin SH3	Src homology 3 group	0.4151	0.000402996	ITA3_HUMAN (swissprot)	P867	LSDPGDRpSSPQRRR	3.21863
Amphiphysin SH3	Src homology 3 group	0.5329	0.00492961	ITA9_HUMAN (swissprot)	P34	AGAYNLDpQRPVHFQ	2.55966
Amphiphysin SH3	Src homology 3 group	0.4962	0.00224341	ITB4_HUMAN (swissprot)	P1664	LQLSWERpRRPNGDI	7.12993
Amphiphysin SH3	Src homology 3 group	0.5398	0.00568366	TENS1_HUMAN (swissprot)	P660	QQQQQQQpRPPPRQQ	4.97713
Amphiphysin SH3	Src homology 3 group	0.5334	0.00497984	TENS1_HUMAN (swissprot)	P663	QQQQPRPpPRQQERA	5.62889
Amphiphysin SH3	Src homology 3 group	0.4652	0.00121572	TENS1_HUMAN (swissprot)	P889	REKQPAEpPAPLRRR	1.4975
Amphiphysin SH3	Src homology 3 group	0.4511	0.00092368	FAK1_HUMAN (swissprot)	P715	SDEAPPKpSRPGYPS	4.44739
Amphiphysin SH3	Src homology 3 group	0.4897	0.0019811	FAK1_HUMAN (swissprot)	P718	APPKPSRpGYPSPRS	2.23011
Amphiphysin SH3	Src homology 3 group	0.5707	0.00965409	FAK1_HUMAN (swissprot)	P873	KPDPAAPpKKPPRPG	3.42323
Amphiphysin SH3	Src homology 3 group	0.5643	0.00858401	FAK1_HUMAN (swissprot)	P876	PAAPPKKpPRPGAPG	6.63687
Amphiphysin SH3	Src homology 3 group	0.5707	0.00965409	VASP_HUMAN (swissprot)	P174	AGGPPPPpGPPPPPG	2.00475
Amphiphysin SH3	Src homology 3 group	0.5565	0.00761383	VASP_HUMAN (swissprot)	P180	PPGPPPPpGPPPPPG	2.00475
Amphiphysin SH3	Src homology 3 group	0.5643	0.00858401	PARVA_HUMAN (swissprot)	P17	SVPKSPTpKSPPSRK	3.27702
Amphiphysin SH3	Src homology 3 group	0.5038	0.00260779	VINC_HUMAN (swissprot)	P872	LPEGEVPpPRPPPPE	1.90451
Amphiphysin SH3	Src homology 3 group	0.572	0.00990411	ZYX_HUMAN (swissprot)	P132	GGPEAPIpPPPQPRE	1.42003
Amphiphysin SH3	Src homology 3 group	0.5643	0.00858401	PALLD_HUMAN (swissprot)	P764	SSSSLPSpMSPTPRQ	1.50579
Amphiphysin SH3	Src homology 3 group	0.5123	0.00307982	VINEX_HUMAN (swissprot)	P170	LDWTFEEpPRDPRHL	5.3753
Amphiphysin SH3	Src homology 3 group	0.551	0.00692974	ASAP1_HUMAN (swissprot)	P828	TLSKKRPpPPPPGHK	3.96773
Amphiphysin SH3	Src homology 3 group	0.5243	0.0040781	PAK1_HUMAN (swissprot)	P13	LDIQDKPpAPPMRNT	2.64683
AMP_Kinase	Basophilic serine/threonine kinase	0.6044	0.00716152	ITA1_HUMAN (swissprot)	T419	QIIIPRNtTFNVEST	2.25762
AMP_Kinase	Basophilic serine/threonine kinase	0.6189	0.00912483	ITA1_HUMAN (swissprot)	S1005	PELKLSIsFPNMTSN	0.64508
AMP_Kinase	Basophilic serine/threonine kinase	0.5576	0.00306878	ITA1_HUMAN (swissprot)	S1099	TFIKSYFsSLNLTIR	0.769037
AMP_Kinase	Basophilic serine/threonine kinase	0.6241	0.00996687	ITA2_HUMAN (swissprot)	T275	SGGRRSAtKVMVVVT	0.657712
AMP_Kinase	Basophilic serine/threonine kinase	0.6145	0.00848194	ITA2_HUMAN (swissprot)	S1033	LKIGQTSsSVSFKSE	0.791711
AMP_Kinase	Basophilic serine/threonine kinase	0.5591	0.00315042	ITA6_HUMAN (swissprot)	S638	SSRRRVNsLPEVLPI	0.840648
AMP_Kinase	Basophilic serine/threonine kinase	0.6235	0.00986972	ITA6_HUMAN (swissprot)	S985	CPLRGLDsKASLILR	1.14512
AMP_Kinase	Basophilic serine/threonine kinase	0.6085	0.00769753	ITA8_HUMAN (swissprot)	T898	SAFLRNStIPHLVRK	1.09167
AMP_Kinase	Basophilic serine/threonine kinase	0.5844	0.00502557	ITAV_HUMAN (swissprot)	S955	YSLKSSAsFNVIEFP	0.446244
AMP_Kinase	Basophilic serine/threonine kinase	0.5483	0.00256263	ITB1_HUMAN (swissprot)	S178	NEMRRITsDFRIGFG	0.879956
AMP_Kinase	Basophilic serine/threonine kinase	0.6195	0.00922199	ITB1_HUMAN (swissprot)	S327	AHLVQKLsENNIQTI	2.44629
AMP_Kinase	Basophilic serine/threonine kinase	0.6015	0.00678239	ITB4_HUMAN (swissprot)	S161	QNLARVLsQLTSDYT	0.387459
AMP_Kinase	Basophilic serine/threonine kinase	0.5741	0.00418131	ITB4_HUMAN (swissprot)	T309	QDYPSVPtLVRLLAK	0.455052
AMP_Kinase	Basophilic serine/threonine kinase	0.5361	0.00202318	ITB4_HUMAN (swissprot)	T1113	DELDRSFtSQMLSSQ	0.881469
AMP_Kinase	Basophilic serine/threonine kinase	0.5456	0.00241568	ITB5_HUMAN (swissprot)	S173	EEMRKLTsNFRLGFG	1.03524
AMP_Kinase	Basophilic serine/threonine kinase	0.493	0.00085326	SHPS1_HUMAN (swissprot)	T92	GHFPRVTtVSDLTKR	0.588453
AMP_Kinase	Basophilic serine/threonine kinase	0.6129	0.00827276	TLN1_HUMAN (swissprot)	T150	GTLRKDKtLLRDEKK	1.47133
AMP_Kinase	Basophilic serine/threonine kinase	0.5933	0.00588888	TLN1_HUMAN (swissprot)	S405	IILKKKKsKDHFGLE	5.58175
AMP_Kinase	Basophilic serine/threonine kinase	0.5049	0.00108779	FLNA_HUMAN (swissprot)	S2152	TRRRRAPsVANVGSH	0.600713
AMP_Kinase	Basophilic serine/threonine kinase	0.6107	0.00798515	FLNA_HUMAN (swissprot)	S2526	PRLVSNHsLHETSSV	1.35625
AMP_Kinase	Basophilic serine/threonine kinase	0.5541	0.0028783	ACTN1_HUMAN (swissprot)	T50	SHLRKAGtQIENIEE	0.695161
AMP_Kinase	Basophilic serine/threonine kinase	0.6132	0.00831198	PTPRA_HUMAN (swissprot)	S213	PLLARSPsTNRKYPP	3.00405
AMP_Kinase	Basophilic serine/threonine kinase	0.5809	0.00468607	PTPRA_HUMAN (swissprot)	S280	NILPYDHsRVHLTPV	1.38046
AMP_Kinase	Basophilic serine/threonine kinase	0.6064	0.00742299	PAXI_HUMAN (swissprot)	S143	TSLGSNLsELDRLLL	1.00878
AMP_Kinase	Basophilic serine/threonine kinase	0.475	0.000575612	VASP_HUMAN (swissprot)	S322	TTLPRMKsSSSVTTS	1.46278
AMP_Kinase	Basophilic serine/threonine kinase	0.5656	0.003564	VASP_HUMAN (swissprot)	S325	PRMKSSSsVTTSETQ	0.852612
AMP_Kinase	Basophilic serine/threonine kinase	0.5863	0.00520988	ZYX_HUMAN (swissprot)	S205	PPWKSPSsSQPLPQV	2.28378
AMP_Kinase	Basophilic serine/threonine kinase	0.5761	0.00432656	PALLD_HUMAN (swissprot)	S1116	PHVRRPRsRSRDSGD	4.78158
AMP_Kinase	Basophilic serine/threonine kinase	0.5859	0.00517107	SRBS1_HUMAN (swissprot)	S369	DSRRVVKsTQDLSDV	1.90267
AMP_Kinase	Basophilic serine/threonine kinase	0.6055	0.00730533	SRBS1_HUMAN (swissprot)	S479	SPLSVPRsKSEMSYI	4.31693
AMP_Kinase	Basophilic serine/threonine kinase	0.6123	0.00819432	SRBS1_HUMAN (swissprot)	S505	LPLPARSsSLKSSSE	1.78159
AMP_Kinase	Basophilic serine/threonine kinase	0.5525	0.00279122	SRBS1_HUMAN (swissprot)	S704	SGLKRPSsSASTKDS	1.15458
AMP_Kinase	Basophilic serine/threonine kinase	0.6112	0.00805051	ASAP1_HUMAN (swissprot)	S13	SRLSSFSsRDSLWNR	1.56211
AMP_Kinase	Basophilic serine/threonine kinase	0.543	0.00229229	PAK1_HUMAN (swissprot)	T22	PPMRNTStMIGAGSK	0.43912
Akt Kinase	Basophilic serine/threonine kinase	0.5332	0.00535476	ITA4_HUMAN (swissprot)	S1021	QEENRRDsWSYINSK	2.21785
Akt Kinase	Basophilic serine/threonine kinase	0.5449	0.00630711	ITA5_HUMAN (swissprot)	S514	NPEERSCsLEGNPVA	0.311812
Akt Kinase	Basophilic serine/threonine kinase	0.3241	0.000137029	ITA6_HUMAN (swissprot)	S638	SSRRRVNsLPEVLPI	0.840648
Akt Kinase	Basophilic serine/threonine kinase	0.5476	0.00657212	ITA9_HUMAN (swissprot)	S753	GNTERSEsLHDNTLV	1.3357
Akt Kinase	Basophilic serine/threonine kinase	0.5177	0.00426885	ITB4_HUMAN (swissprot)	S397	FQKTRTGsFHIRRGE	0.362274
Akt Kinase	Basophilic serine/threonine kinase	0.5392	0.00580736	ITB4_HUMAN (swissprot)	S1325	TQPKRPMsIPIIPDI	0.357065
Akt Kinase	Basophilic serine/threonine kinase	0.4634	0.00184174	ITB5_HUMAN (swissprot)	S229	PLTDRVDsFNEEVRK	0.953295
Akt Kinase	Basophilic serine/threonine kinase	0.4278	0.00101862	UROK_HUMAN (swissprot)	S204	YRRHRGGsVTYVCGG	0.504804
Akt Kinase	Basophilic serine/threonine kinase	0.5572	0.00751436	UROK_HUMAN (swissprot)	S246	LGRSRLNsNTQGEMK	1.76536
Akt Kinase	Basophilic serine/threonine kinase	0.4941	0.00301551	SHPS1_HUMAN (swissprot)	T92	GHFPRVTtVSDLTKR	0.588453
Akt Kinase	Basophilic serine/threonine kinase	0.5609	0.00787751	SHPS1_HUMAN (swissprot)	T298	GNVSRTEtASTVTEN	1.61509
Akt Kinase	Basophilic serine/threonine kinase	0.5367	0.00561878	TLN1_HUMAN (swissprot)	S1227	SKRLLSDsLPPSTGT	1.35521
Akt Kinase	Basophilic serine/threonine kinase	0.5318	0.00524915	FLNA_HUMAN (swissprot)	S343	NDKNRTFsVWYVPEV	0.46931
Akt Kinase	Basophilic serine/threonine kinase	0.4869	0.00268995	FLNA_HUMAN (swissprot)	S2152	TRRRRAPsVANVGSH	0.600713
Akt Kinase	Basophilic serine/threonine kinase	0.5375	0.00567913	FLNA_HUMAN (swissprot)	T2336	SGDARRLtVSSLQES	0.712071
Akt Kinase	Basophilic serine/threonine kinase	0.5299	0.00510583	FLNA_HUMAN (swissprot)	S2615	HVGSRLYsVSYLLKD	0.618485
Akt Kinase	Basophilic serine/threonine kinase	0.5318	0.00524915	ACTN1_HUMAN (swissprot)	T765	FDRDHSGtLGPEEFK	0.553513
Akt Kinase	Basophilic serine/threonine kinase	0.5206	0.00443704	TENS1_HUMAN (swissprot)	S621	SGMFRSQsFSEAEPQ	1.43239
Akt Kinase	Basophilic serine/threonine kinase	0.4795	0.00239836	TENS1_HUMAN (swissprot)	S899	PLRRRAAsDGQYENQ	0.897065
Akt Kinase	Basophilic serine/threonine kinase	0.5258	0.00479655	TENS1_HUMAN (swissprot)	S1119	ESGFRSGsLGQPSPS	0.575653
Akt Kinase	Basophilic serine/threonine kinase	0.5568	0.0074751	TENS1_HUMAN (swissprot)	T1184	SPQARHRtVGTNTPP	0.934372
Akt Kinase	Basophilic serine/threonine kinase	0.5456	0.00637582	TENS1_HUMAN (swissprot)	T1335	TPEDRRPtLSRQSSA	2.16817
Akt Kinase	Basophilic serine/threonine kinase	0.5366	0.00561124	TENS1_HUMAN (swissprot)	S1393	LPEKRRMsVGDRAGS	0.730163
Akt Kinase	Basophilic serine/threonine kinase	0.4904	0.00284821	TENS1_HUMAN (swissprot)	S1400	SVGDRAGsLPNYATI	0.653837
Akt Kinase	Basophilic serine/threonine kinase	0.5659	0.00846626	PTPRA_HUMAN (swissprot)	T741	AGAGRTGtFCALSTV	0.221497
Akt Kinase	Basophilic serine/threonine kinase	0.5561	0.00740639	FAK1_HUMAN (swissprot)	S390	GMRTHAVsVSETDDY	0.396661
Akt Kinase	Basophilic serine/threonine kinase	0.4055	0.000659091	ILK_HUMAN (swissprot)	T181	RTRPRNGtLNKHSGI	1.50541
Akt Kinase	Basophilic serine/threonine kinase	0.5764	0.00971481	CAV1_HUMAN (swissprot)	S149	QCISRVYsIYVHTVC	0.291164
Akt Kinase	Basophilic serine/threonine kinase	0.5006	0.00330943	ZYX_HUMAN (swissprot)	S143	QPREKVSsIDLEIDS	0.294894
Akt Kinase	Basophilic serine/threonine kinase	0.4993	0.00325064	PALLD_HUMAN (swissprot)	S1118	VRRPRSRsRDSGDEN	3.53334
Akt Kinase	Basophilic serine/threonine kinase	0.5649	0.00834735	VINEX_HUMAN (swissprot)	S570	SPRRTGFsFPTQEPR	0.50854
Akt Kinase	Basophilic serine/threonine kinase	0.5289	0.0050304	SRBS1_HUMAN (swissprot)	S37	PLRARSIsAVKIIPV	0.432602
Akt Kinase	Basophilic serine/threonine kinase	0.5253	0.00475884	SRBS1_HUMAN (swissprot)	S326	EQQKRLSsLSDPVSE	0.626409
Akt Kinase	Basophilic serine/threonine kinase	0.5471	0.00652304	SRBS1_HUMAN (swissprot)	T497	KVVKRSAtLPLPARS	0.47087
Akt Kinase	Basophilic serine/threonine kinase	0.5666	0.0085495	SRBS1_HUMAN (swissprot)	T951	SSPSRSAtASPQFSS	0.937326
Akt Kinase	Basophilic serine/threonine kinase	0.4513	0.0015272	ASAP1_HUMAN (swissprot)	S10	SSASRLSsFSSRDSL	0.527807
Akt Kinase	Basophilic serine/threonine kinase	0.5531	0.00711194	ASAP1_HUMAN (swissprot)	S839	PGHKRTLsDPPSPLP	1.45946
Akt Kinase	Basophilic serine/threonine kinase	0.569	0.00883488	SDCB1_HUMAN (swissprot)	T200	RPFERTItMHKDSTG	0.901041
Akt Kinase	Basophilic serine/threonine kinase	0.4705	0.00208196	AKT1_HUMAN (swissprot)	T72	TERPRPNtFIIRCLQ	0.363383
Akt Kinase	Basophilic serine/threonine kinase	0.5015	0.00335012	AKT1_HUMAN (swissprot)	S246	LSRERVFsEDRARFY	1.11806
Akt Kinase	Basophilic serine/threonine kinase	0.5532	0.00712176	PK3CA_HUMAN (swissprot)	S231	AIRKKTRsMLLSSEQ	0.584264
Akt Kinase	Basophilic serine/threonine kinase	0.5485	0.00666045	FYN_HUMAN (swissprot)	T82	TLRTRGGtGVTLFVA	0.343348
Akt Kinase	Basophilic serine/threonine kinase	0.5449	0.00630711	CAN2_HUMAN (swissprot)	S462	TNRARERsDTFINLR	2.17401
Akt Kinase	Basophilic serine/threonine kinase	0.3696	0.000349828	CAN2_HUMAN (swissprot)	T464	RARERSDtFINLREV	0.750278
Akt Kinase	Basophilic serine/threonine kinase	0.5494	0.00674879	CAN2_HUMAN (swissprot)	T621	IDVDRSGtMNSYEMR	0.971415
Akt Kinase	Basophilic serine/threonine kinase	0.4968	0.0031376	KPCA_HUMAN (swissprot)	S241	SDKDRRLsVEIWDWD	0.446962
Abl SH3	Src homology 3 group	0.4591	0.0085268	ITA5_HUMAN (swissprot)	P24	WGPRRRPpLLPLLLL	1.1286
Abl SH3	Src homology 3 group	0.4166	0.00441062	ITA5_HUMAN (swissprot)	P752	GGLRFTVpHLRDTKK	0.834261
Abl SH3	Src homology 3 group	0.46	0.00864541	PTPRA_HUMAN (swissprot)	P414	SWPDFGVpFTPIGML	0.502952
Abl SH3	Src homology 3 group	0.4565	0.00818412	PAXI_HUMAN (swissprot)	P47	YQEIAVPpPVPPPPS	0.72171
Abl SH3	Src homology 3 group	0.4483	0.00717762	VASP_HUMAN (swissprot)	P130	ALPTWSVpNGPSPEE	0.900694
Abl SH3	Src homology 3 group	0.4344	0.00587162	VASP_HUMAN (swissprot)	P170	PAPPAGGpPPPPGPP	1.28304
Abl SH3	Src homology 3 group	0.3373	0.00106928	VASP_HUMAN (swissprot)	P171	APPAGGPpPPPGPPP	2.00475
Abl SH3	Src homology 3 group	0.4381	0.00621926	VASP_HUMAN (swissprot)	P176	GPPPPPGpPPPPGPP	2.00475
Abl SH3	Src homology 3 group	0.3849	0.00260155	VASP_HUMAN (swissprot)	P177	PPPPPGPpPPPGPPP	2.00475
Abl SH3	Src homology 3 group	0.3956	0.00308835	VASP_HUMAN (swissprot)	P179	PPPGPPPpPGPPPPP	2.00475
Abl SH3	Src homology 3 group	0.4655	0.0093703	VASP_HUMAN (swissprot)	P182	GPPPPPGpPPPPGLP	2.00475
Abl SH3	Src homology 3 group	0.3688	0.00190413	VASP_HUMAN (swissprot)	P183	PPPPPGPpPPPGLPP	2.00475
Abl SH3	Src homology 3 group	0.4675	0.0096339	VASP_HUMAN (swissprot)	P206	GAGGGPPpAPPLPAA	2.04652
Abl SH3	Src homology 3 group	0.2612	0.000132728	ZYX_HUMAN (swissprot)	P74	PPEDFPLpPPPLAGD	1.67063
Abl SH3	Src homology 3 group	0.3454	0.00124899	ZYX_HUMAN (swissprot)	P96	LGGAFPPpPPPIEES	3.13242
Abl SH3	Src homology 3 group	0.4638	0.00914625	ZYX_HUMAN (swissprot)	P117	EEEIFPSpPPPPEEE	2.71477
Abl SH3	Src homology 3 group	0.4628	0.00901445	ZYX_HUMAN (swissprot)	P132	GGPEAPIpPPPQPRE	1.42003
Abl SH3	Src homology 3 group	0.443	0.00667965	ZYX_HUMAN (swissprot)	P175	VSSGYVPpPVATPFS	0.471517
Abl SH3	Src homology 3 group	0.4391	0.00631322	ZYX_HUMAN (swissprot)	P196	PAAGGTApLPPWKSP	1.01871
Abl SH3	Src homology 3 group	0.4437	0.00674542	PALLD_HUMAN (swissprot)	P680	AGARQPPpAPRSAPP	2.59225
Abl SH3	Src homology 3 group	0.4371	0.00612531	PALLD_HUMAN (swissprot)	P686	PPAPRSApPSPPFPP	1.53716
Abl SH3	Src homology 3 group	0.3826	0.00249691	PALLD_HUMAN (swissprot)	P687	PAPRSAPpSPPFPPP	1.77365
Abl SH3	Src homology 3 group	0.4586	0.0084609	PALLD_HUMAN (swissprot)	P802	SSPSPPPpPPPVFSP	3.13242
Abl SH3	Src homology 3 group	0.3321	0.000958564	PALLD_HUMAN (swissprot)	P822	VPDVFPLpPPPPPLP	1.67063
Abl SH3	Src homology 3 group	0.4628	0.00901445	PALLD_HUMAN (swissprot)	P824	DVFPLPPpPPPLPSP	3.13242
Abl SH3	Src homology 3 group	0.3461	0.00126859	SRBS1_HUMAN (swissprot)	P244	TPPSFSPpPPLVPPA	1.44788
Abl SH3	Src homology 3 group	0.3889	0.00278353	ASAP1_HUMAN (swissprot)	P792	SPTTEAPpLPPRNAG	1.09147
Abl SH3	Src homology 3 group	0.4198	0.004617	BCAR1_HUMAN (swissprot)	P252	PQDIYDVpPVRGLLP	0.987299
Abl SH2	Src homology 2 group	0.4614	0.00971626	ITA3_HUMAN (swissprot)	Y239	WDLSEYSyKDPEDQG	3.89378
Abl SH2	Src homology 2 group	0.4099	0.00405557	ITA6_HUMAN (swissprot)	Y268	LFLTSVSyTDPDQFV	1.33103
Abl SH2	Src homology 2 group	0.4256	0.00533055	ITB5_HUMAN (swissprot)	Y192	KDISPFSyTAPRYQT	0.939386
Abl SH2	Src homology 2 group	0.4591	0.00933712	TENS1_HUMAN (swissprot)	Y1345	RQSSASGyQAPSTPS	1.2883
Abl SH2	Src homology 2 group	0.3936	0.00287651	FAK1_HUMAN (swissprot)	Y407	IIDEEDTyTMPSTRD	1.91122
Abl SH2	Src homology 2 group	0.3543	0.00116964	SRBS1_HUMAN (swissprot)	Y441	DNPYTPTyQFPASTP	1.85813
Abl SH2	Src homology 2 group	0.4564	0.00889203	BCAR1_HUMAN (swissprot)	Y115	QPQPDSVyLVPTPSK	0.338038
Abl SH2	Src homology 2 group	0.4126	0.00425088	BCAR1_HUMAN (swissprot)	Y128	SKAQQGLyQVPGPSP	0.582466
Abl SH2	Src homology 2 group	0.3196	0.000493417	BCAR1_HUMAN (swissprot)	Y165	PSPATDLyQVPPGPG	0.982911
Abl SH2	Src homology 2 group	0.3658	0.00153729	BCAR1_HUMAN (swissprot)	Y179	GGPAQDIyQVPPSAG	0.835475
Abl SH2	Src homology 2 group	0.4136	0.00432321	BCAR1_HUMAN (swissprot)	Y192	AGMGHDIyQVPPSMD	0.835475
Abl SH2	Src homology 2 group	0.3658	0.00153729	BCAR1_HUMAN (swissprot)	Y249	APGPQDIyDVPPVRG	0.805636
Abl SH2	Src homology 2 group	0.421	0.00485849	BCAR1_HUMAN (swissprot)	Y267	SQYGQEVyDTPPMAV	1.72009
Abl SH2	Src homology 2 group	0.3815	0.00226152	BCAR1_HUMAN (swissprot)	Y287	RDPLLEVyDVPPSVE	0.88462
Abl SH2	Src homology 2 group	0.3758	0.00199858	BCAR1_HUMAN (swissprot)	Y306	PSNHHAVyDVPPSVS	0.516028
Abl SH2	Src homology 2 group	0.3843	0.00239068	BCAR1_HUMAN (swissprot)	Y327	PLLREETyDVPPAFA	1.72009
Abl SH2	Src homology 2 group	0.2972	0.000239907	BCAR1_HUMAN (swissprot)	Y362	SPPAEDVyDVPPPAP	0.853027
Abl SH2	Src homology 2 group	0.3339	0.000701705	BCAR1_HUMAN (swissprot)	Y372	PPPAPDLyDVPPGLR	0.947807
Abl SH2	Src homology 2 group	0.4576	0.00908985	BCAR1_HUMAN (swissprot)	Y387	RPGPGTLyDVPRERV	0.819093
Abl Kinase	Tyrosine kinase group	0.3814	0.00123955	ITA1_HUMAN (swissprot)	Y80	KNRTGDVyKCPVGRG	0.737769
Abl Kinase	Tyrosine kinase group	0.4772	0.00719681	ITA2_HUMAN (swissprot)	Y81	ENRMGDVyKCPVDLS	0.737769
Abl Kinase	Tyrosine kinase group	0.3845	0.00131821	ITA3_HUMAN (swissprot)	Y92	TNRTGAVyLCPLTAH	0.184043
Abl Kinase	Tyrosine kinase group	0.4818	0.00779576	ITA4_HUMAN (swissprot)	Y166	KLPTGGCyGVPPDLR	0.216344
Abl Kinase	Tyrosine kinase group	0.4641	0.00579512	ITA5_HUMAN (swissprot)	Y995	WTKAEGSyGVPLWII	0.540861
Abl Kinase	Tyrosine kinase group	0.4636	0.00574683	ITA8_HUMAN (swissprot)	Y94	IVEGGAVyYCPWPAE	0.349682
Abl Kinase	Tyrosine kinase group	0.4901	0.00887648	ITB4_HUMAN (swissprot)	Y408	RRGEVGIyQVQLRAL	0.554508
Abl Kinase	Tyrosine kinase group	0.4158	0.00243002	ITB5_HUMAN (swissprot)	Y9	PRAPAPLyACLLGLC	0.204492
Abl Kinase	Tyrosine kinase group	0.4813	0.00773066	TENS1_HUMAN (swissprot)	Y222	PVYTSGIyNIPGDSQ	0.450891
Abl Kinase	Tyrosine kinase group	0.423	0.00279987	TENS1_HUMAN (swissprot)	Y1345	RQSSASGyQAPSTPS	1.2883
Abl Kinase	Tyrosine kinase group	0.4222	0.00275877	FAK1_HUMAN (swissprot)	Y407	IIDEEDTyTMPSTRD	1.91122
Abl Kinase	Tyrosine kinase group	0.4335	0.00333923	FAK1_HUMAN (swissprot)	Y441	GDVHQGIyMSPENPA	0.510813
Abl Kinase	Tyrosine kinase group	0.3502	0.000598458	PAXI_HUMAN (swissprot)	Y181	PGALSPLyGVPETNS	0.520059
Abl Kinase	Tyrosine kinase group	0.4543	0.00484861	CAV1_HUMAN (swissprot)	Y14	VDSEGHLyTVPIREQ	0.667409
Abl Kinase	Tyrosine kinase group	0.4124	0.00227497	SRBS1_HUMAN (swissprot)	Y419	ENPYFPTyKFPELPE	2.14569
Abl Kinase	Tyrosine kinase group	0.3162	0.000231152	SRBS1_HUMAN (swissprot)	Y441	DNPYTPTyQFPASTP	1.85813
Abl Kinase	Tyrosine kinase group	0.4557	0.00498383	FYN_HUMAN (swissprot)	Y440	TAPEAALyGRFTIKS	0.502107
Abl Kinase	Tyrosine kinase group	0.4557	0.00498383	SRC_HUMAN (swissprot)	Y439	TAPEAALyGRFTIKS	0.502107
Abl Kinase	Tyrosine kinase group	0.3432	0.000490285	BCAR1_HUMAN (swissprot)	Y115	QPQPDSVyLVPTPSK	0.338038
Abl Kinase	Tyrosine kinase group	0.4024	0.00188387	BCAR1_HUMAN (swissprot)	Y128	SKAQQGLyQVPGPSP	0.582466
Abl Kinase	Tyrosine kinase group	0.2768	8.55934e-05	BCAR1_HUMAN (swissprot)	Y165	PSPATDLyQVPPGPG	0.982911
Abl Kinase	Tyrosine kinase group	0.3518	0.000623183	BCAR1_HUMAN (swissprot)	Y179	GGPAQDIyQVPPSAG	0.835475
Abl Kinase	Tyrosine kinase group	0.3654	0.000882125	BCAR1_HUMAN (swissprot)	Y249	APGPQDIyDVPPVRG	0.805636
Abl Kinase	Tyrosine kinase group	0.4815	0.0077567	BCAR1_HUMAN (swissprot)	Y267	SQYGQEVyDTPPMAV	1.72009
Abl Kinase	Tyrosine kinase group	0.4421	0.00395179	BCAR1_HUMAN (swissprot)	Y287	RDPLLEVyDVPPSVE	0.88462
Abl Kinase	Tyrosine kinase group	0.4497	0.00449696	BCAR1_HUMAN (swissprot)	Y327	PLLREETyDVPPAFA	1.72009
Abl Kinase	Tyrosine kinase group	0.2904	0.000118026	BCAR1_HUMAN (swissprot)	Y362	SPPAEDVyDVPPPAP	0.853027
Abl Kinase	Tyrosine kinase group	0.307	0.000185066	BCAR1_HUMAN (swissprot)	Y372	PPPAPDLyDVPPGLR	0.947807
Abl Kinase	Tyrosine kinase group	0.3067	0.000183621	BCAR1_HUMAN (swissprot)	Y387	RPGPGTLyDVPRERV	0.819093
Abl Kinase	Tyrosine kinase group	0.3754	0.00108731	BCAR1_HUMAN (swissprot)	Y410	GVVDSGVyAVPPPAE	0.305795
Abl Kinase	Tyrosine kinase group	0.4908	0.00896763	CAN2_HUMAN (swissprot)	Y434	HTIGFGIyEVPEELS	0.495096
14-3-3 Mode 1	Phosphoserine/threonine binding group	0.3112	0.00155782	ITA1_HUMAN (swissprot)	S89	CPVGRGEsLPCVKLD	0.359783
14-3-3 Mode 1	Phosphoserine/threonine binding group	0.4567	0.00992426	ITA1_HUMAN (swissprot)	S994	YLIRKSGsFPMPELK	0.539675
14-3-3 Mode 1	Phosphoserine/threonine binding group	0.4446	0.00857433	ITA5_HUMAN (swissprot)	S514	NPEERSCsLEGNPVA	0.311812
14-3-3 Mode 1	Phosphoserine/threonine binding group	0.3054	0.00139448	ITA6_HUMAN (swissprot)	S638	SSRRRVNsLPEVLPI	0.840648
14-3-3 Mode 1	Phosphoserine/threonine binding group	0.3928	0.00469572	ITA8_HUMAN (swissprot)	S793	QVEIRGVsHPPQIVL	0.733899
14-3-3 Mode 1	Phosphoserine/threonine binding group	0.413	0.00597923	ITA9_HUMAN (swissprot)	T91	VFKCRVHtNPDRRCT	1.44042
14-3-3 Mode 1	Phosphoserine/threonine binding group	0.4166	0.00624877	ITAV_HUMAN (swissprot)	S492	NQDNKTCsLPGTALK	0.29982
14-3-3 Mode 1	Phosphoserine/threonine binding group	0.454	0.00962303	ITAV_HUMAN (swissprot)	S550	FLYSRSPsHSKNMTI	2.32076
14-3-3 Mode 1	Phosphoserine/threonine binding group	0.409	0.0056939	ITAV_HUMAN (swissprot)	S778	AVEIRGVsSPDHVFL	0.780602
14-3-3 Mode 1	Phosphoserine/threonine binding group	0.4346	0.0076906	ITB4_HUMAN (swissprot)	T1434	GSLPRSAtPGPPGEH	1.05946
14-3-3 Mode 1	Phosphoserine/threonine binding group	0.4333	0.00757681	ITB4_HUMAN (swissprot)	T1505	SEHSHSTtLPRDYST	1.5976
14-3-3 Mode 1	Phosphoserine/threonine binding group	0.3939	0.00476188	ITB5_HUMAN (swissprot)	T199	YTAPRYQtNPCIGYK	1.24229
14-3-3 Mode 1	Phosphoserine/threonine binding group	0.4334	0.00758556	SHPS1_HUMAN (swissprot)	T298	GNVSRTEtASTVTEN	1.61509
14-3-3 Mode 1	Phosphoserine/threonine binding group	0.2759	0.000750706	TLN1_HUMAN (swissprot)	T1562	RAQCRAAtAPLLEAV	0.434831
14-3-3 Mode 1	Phosphoserine/threonine binding group	0.4289	0.00719167	TLN1_HUMAN (swissprot)	T1877	EMVTKSNtSPEELGP	2.65621
14-3-3 Mode 1	Phosphoserine/threonine binding group	0.3705	0.00358269	TENS1_HUMAN (swissprot)	S621	SGMFRSQsFSEAEPQ	1.43239
14-3-3 Mode 1	Phosphoserine/threonine binding group	0.3617	0.00321782	TENS1_HUMAN (swissprot)	S733	APLHKSQsVPGAWPG	0.809513
14-3-3 Mode 1	Phosphoserine/threonine binding group	0.3083	0.00147514	TENS1_HUMAN (swissprot)	S1048	DSEPKSFsAPATQAY	0.562396
14-3-3 Mode 1	Phosphoserine/threonine binding group	0.3917	0.00463784	TENS1_HUMAN (swissprot)	T1107	DQGPRTPtQPLLESG	1.62994
14-3-3 Mode 1	Phosphoserine/threonine binding group	0.317	0.00172319	TENS1_HUMAN (swissprot)	S1119	ESGFRSGsLGQPSPS	0.575653
14-3-3 Mode 1	Phosphoserine/threonine binding group	0.3452	0.00261112	TENS1_HUMAN (swissprot)	T1184	SPQARHRtVGTNTPP	0.934372
14-3-3 Mode 1	Phosphoserine/threonine binding group	0.4502	0.00919909	TENS1_HUMAN (swissprot)	T1335	TPEDRRPtLSRQSSA	2.16817
14-3-3 Mode 1	Phosphoserine/threonine binding group	0.4431	0.00843462	TENS1_HUMAN (swissprot)	S1341	PTLSRQSsASGYQAP	0.954925
14-3-3 Mode 1	Phosphoserine/threonine binding group	0.259	0.000544874	TENS1_HUMAN (swissprot)	S1400	SVGDRAGsLPNYATI	0.653837
14-3-3 Mode 1	Phosphoserine/threonine binding group	0.4468	0.00881977	TENS1_HUMAN (swissprot)	T1433	STVSFSHtLPDFSKY	1.28432
14-3-3 Mode 1	Phosphoserine/threonine binding group	0.3656	0.00337952	ILK_HUMAN (swissprot)	S246	CPRLRIFsHPNVLPV	0.655005
14-3-3 Mode 1	Phosphoserine/threonine binding group	0.4026	0.00529888	PARVA_HUMAN (swissprot)	S10	TSPQKSPsVPKSPTP	1.46062
14-3-3 Mode 1	Phosphoserine/threonine binding group	0.4506	0.00924372	PALLD_HUMAN (swissprot)	S114	EKQTKSIsSPVSKRK	0.443706
14-3-3 Mode 1	Phosphoserine/threonine binding group	0.4546	0.00968997	PALLD_HUMAN (swissprot)	S1116	PHVRRPRsRSRDSGD	4.78158
14-3-3 Mode 1	Phosphoserine/threonine binding group	0.3632	0.00328001	VINEX_HUMAN (swissprot)	S544	ARSARHPsSPSALRS	1.7944
14-3-3 Mode 1	Phosphoserine/threonine binding group	0.4146	0.00609903	VINEX_HUMAN (swissprot)	S597	LSHSRGPsHPLDLGT	0.815443
14-3-3 Mode 1	Phosphoserine/threonine binding group	0.3039	0.00135313	SRBS1_HUMAN (swissprot)	S259	PEDLRRVsEPDLTGA	1.99654
14-3-3 Mode 1	Phosphoserine/threonine binding group	0.443	0.00842587	SRBS1_HUMAN (swissprot)	S326	EQQKRLSsLSDPVSE	0.626409
14-3-3 Mode 1	Phosphoserine/threonine binding group	0.4352	0.00774312	SRBS1_HUMAN (swissprot)	S481	LSVPRSKsEMSYIDG	1.89036
14-3-3 Mode 1	Phosphoserine/threonine binding group	0.1843	0.00010685	SRBS1_HUMAN (swissprot)	T497	KVVKRSAtLPLPARS	0.47087
14-3-3 Mode 1	Phosphoserine/threonine binding group	0.3105	0.00153787	SRBS1_HUMAN (swissprot)	T951	SSPSRSAtASPQFSS	0.937326
14-3-3 Mode 1	Phosphoserine/threonine binding group	0.4117	0.0058819	ASAP1_HUMAN (swissprot)	S839	PGHKRTLsDPPSPLP	1.45946
14-3-3 Mode 1	Phosphoserine/threonine binding group	0.3831	0.00418536	FYN_HUMAN (swissprot)	T32	SSGYRYGtDPTPQHY	1.91122
14-3-3 Mode 1	Phosphoserine/threonine binding group	0.4265	0.00698999	FYN_HUMAN (swissprot)	T126	WWEARSLtTGETGYI	0.904071
14-3-3 Mode 1	Phosphoserine/threonine binding group	0.1914	0.000124528	BCAR1_HUMAN (swissprot)	S494	TGSWRSPsEPQEPLV	2.95135
14-3-3 Mode 1	Phosphoserine/threonine binding group	0.4316	0.00742801	CAN2_HUMAN (swissprot)	T370	GNWRRGStAGGCRNY	0.433954
14-3-3 Mode 1	Phosphoserine/threonine binding group	0.4346	0.0076906	CAN2_HUMAN (swissprot)	T621	IDVDRSGtMNSYEMR	0.971415

## Sheet: Binding Sites Statistics
Kinase	Count	Accessibility
ABL1	34	1.18344
AKT1	10	0.7784
AMPH	5	3.7048
ATM	9	1.38233
CAMK2G	15	1.05513
CDC2	10	2.498
CDK5	10	2.4809
CLK2	3	3.061
CRK	29	1.3088
CSNK1G2	6	0.861167
CSNK2B	3	2.59833
EGFR	5	0.6622
FGR	6	1.10143
FYN	1	1.483
GRB2	13	1.30423
GSK3A	20	1.199
GSK3B	2	0.944
HCLS1	12	1.65792
PRKCA	4	1.256
ITSN	8	2.4245
ITK	19	1.48889
MAPK1	39	0.535231
MAPK3	27	1.47981
NCK1	19	1.61173
PDPK1	14	1.67579
PIK3R1	19	1.57916
PLCG1	15	1.39893
PRKACG	10	1.48
PRKCD	9	1.30811
PRKCZ	10	1.0629
PRKDC	12	2.34783
YWHAZ	11	0.974364
SRC	11	1.288
SORBS1	7	1.26829
PIP3-E	1	4.125
PRKCM	6	0.706667
PRKCE	5	1.4848
INPP5D	5	0.503
SHC1	2	2.0775
PRKACD	1	0.619
LCK	1	1.483
PDGFRB	4	1.19975
PRKAA1	5	0.8838
INSR	2	1.257
